# Supplementary material for: Novel mechanism of HIV elite control by enriching gut dipeptides as HIV-1 antagonist but Prevotella agonist
Source: Research Square preprint supplement (doi:10.21203/rs.3.rs-100746/v1), 2020-11-10
Supplement: Supplementary file 1 [file 8517d36aa4136760580f8adf.xlsx]

## Sheet: OrigScale
													SAMPLE_NAME	KARO-00419	KARO-00420	KARO-00421	KARO-00422	KARO-00423	KARO-00424	KARO-00425	KARO-00426	KARO-00427	KARO-00428	KARO-00429	KARO-00430	KARO-00431	KARO-00432	KARO-00433	KARO-00434	KARO-00435	KARO-00436	KARO-00437	KARO-00438	KARO-00439	KARO-00440	KARO-00441	KARO-00442	KARO-00443	KARO-00444	KARO-00445	KARO-00446	KARO-00447	KARO-00448	KARO-00449	KARO-00450	KARO-00451	KARO-00452	KARO-00453	KARO-00454
													SAMPLE_ID	4771208	4771209	4771210	4771211	4771212	4771213	4771214	4771215	4771216	4771217	4771218	4771219	4771220	4771221	4771222	4771223	4771224	4771225	4771226	4771227	4771228	4771229	4771230	4771231	4771232	4771233	4771234	4771235	4771236	4771237	4771238	4771239	4771240	4771241	4771242	4771243
													CLIENT_IDENTIFIER	MB_EC01_Faeces	MB_EC02_Faeces	MB_EC03_Faeces	MB_EC04_Faeces	MB_EC05_Faeces	MB_EC06_Faeces	MB_EC07_Faeces	MB_EC08_Faeces	MB_EC09_Faeces	MB_EC10_Faeces	MB_EC11_Faeces	MB_EC12_Faeces	MB_EC13_Faeces	MB_EC14_Faeces	MB_VP01_Faeces	MB_VP02_Faeces	MB_VP03_Faeces	MB_VP04_Faeces	MB_VP05_Faeces	MB_VP06_Faeces	MB_VP07_Faeces	MB_VP08_Faeces	MB_VP09_Faeces	MB_VP10_Faeces	MB_VP11_Faeces	MB_VP12_Faeces	MB_VP13_Faeces	MB_VP14_Faeces	MB_VP15_Faeces	MB_VP16_Faeces	MB_HC01_Faeces	MB_HC02_Faeces	MB_HC03_Faeces	MB_HC04_Faeces	MB_HC05_Faeces	MB_HC06_Faeces
													AGE	49	68	45	51	44	62	46	32	28	40	41	48	40	52	53	45	48	42	58	36	45	45	47	41	58	38	40	54	38	59	44	48	46	44	39	44
													BMI	26.3	25.7	22.1	25.7	19.4	26.5	38.2	32	32.8	23.9	29	24.5	32.3	35	29	30	27	24	23	25	24	23	34	28	21	32	24	33	23	36	22.9	23	20	23.9	19.7	26
													GENDER	M	M	M	M	F	M	F	F	F	F	F	M	F	M	M	F	M	M	M	M	M	F	F	M	M	M	F	F	F	F	F	M	F	F	F	M
													GROUP_DESCRIPTION	Elite Controller	Elite Controller	Elite Controller	Elite Controller	Elite Controller	Elite Controller	Elite Controller	Elite Controller	Elite Controller	Elite Controller	Elite Controller	Elite Controller	Elite Controller	Elite Controller	Viremic Progressor	Viremic Progressor	Viremic Progressor	Viremic Progressor	Viremic Progressor	Viremic Progressor	Viremic Progressor	Viremic Progressor	Viremic Progressor	Viremic Progressor	Viremic Progressor	Viremic Progressor	Viremic Progressor	Viremic Progressor	Viremic Progressor	Viremic Progressor	Healthy Control	Healthy Control	Healthy Control	Healthy Control	Healthy Control	Healthy Control
													GROUP_NUMBER	1	1	1	1	1	1	1	1	1	1	1	1	1	1	2	2	2	2	2	2	2	2	2	2	2	2	2	2	2	2	3	3	3	3	3	3
													RACE	Black	Caucasian	Caucasian	Caucasian	Black	Caucasian	Black	Black	Black	Black	Black	Latin	Black	Black	Caucasian	Caucasian	Latin	Black	Caucasian	Black	Caucasian	Black	Black	Black	Caucasian	Caucasian	Black	Black	Caucasian	Caucasian	Caucasian	Caucasian	Caucasian	Caucasian	Caucasian	Black
PATHWAY_SORTORDER	BIOCHEMICAL	SUPER_PATHWAY	SUB_PATHWAY	COMP_ID	PLATFORM	CHEMICAL_ID	RI	MASS	CAS	PUBCHEM	CHEMSPIDER	KEGG	Group HMDB_ID	EC	EC	EC	EC	EC	EC	EC	EC	EC	EC	EC	EC	EC	EC	VP	VP	VP	VP	VP	VP	VP	VP	VP	VP	VP	VP	VP	VP	VP	VP	HC	HC	HC	HC	HC	HC
1290	(12 or 13)-methylmyristate (a15:0 or i15:0)	Lipid	Fatty Acid, Branched	38293	LC/MS Neg	100002344	5499	241.217	2485-71-4	151014	133106			1131225088	103156360	121600400	61749016	150903488	1053009600	134115960	52794720	2255867136	580969024	1827687936	22067702	192746560	2019095680	143597840	631122368	914183488	716950720	318349536	1747052288	449058400	207741440	478940064	57696024	936779584	554056320	1392710400	819545856	637102976	97344344	54322900	969604608	213668112	87604160	217520800	583754112
1293	(14 or 15)-methylpalmitate (a17:0 or i17:0)	Lipid	Fatty Acid, Branched	38768	LC/MS Neg	100002945	5695	269.249		17903417				915890944	102247296			116729768	114912368	28406594	8316178				22650808	201635280	137960640	29808072	804416576	242938240	461799616	174733888	613418688	60963148	93492576	136505920	34948880	566456320	143104976	1064590080	205534736	168241504	103008624	48656824	434179648	27556820		172267248	314578528
1296	(16 or 17)-methylstearate (a19:0 or i19:0)	Lipid	Fatty Acid, Branched	38296	LC/MS Neg	100002356	5993	297.28	2724-59-6	3083779	2340933		HMDB37397	4787312	11432536	7173927	9424525	3587940	3893298	1072312	984357	10066517	37723980	27789378	972585	6919630	8046242	2459804	39794640	2123470	9728607	2871310	9522861	1467166	6537015	9334274	7336883	3774700	3952808	14441617	4757621	2109801	3212506	3577857	36871792	2504492	1993479	9127080	5813779
3539	(3'-5')-adenylyladenosine*	Nucleotide	Dinucleotide	62396	LC/MS Neg	100020723	2173	595.142		94231	85040								1660792					160193			1241635	733905	77739	374712	96656	477587			949318		318266	49074			278187	213839	2402505	1304106					21683
3536	(3'-5')-adenylylcytidine	Nucleotide	Dinucleotide	52753	LC/MS Neg	100009062	1920	571.131	4833-63-0	10875494	9050769								387705								126043	88712		291237		166733			271481		95689					70495	400266	269920
3537	(3'-5')-adenylyluridine	Nucleotide	Dinucleotide	52740	LC/MS Neg	100009060	2002	572.115	3051-84-1	112074	100483								1311835				62959	107198			457920	562148	92309	501981	110085	586309			1469597		805955	37010			159961	162243	2313506	1014567
3546	(3'-5')-cytidylylcytidine*	Nucleotide	Dinucleotide	62397	LC/MS Neg	100020727	1472	547.12		94237	85046								229057											577251		311377			243450		82806	207608				81156		212831
3547	(3'-5')-cytidylylguanosine	Nucleotide	Dinucleotide	52745	LC/MS Neg	100009063	1537	587.126	2382-65-2	65101	58611								272164					25715			179529	66085	74987	713979		339969		47888	365294		64135	283408					51521	256177					77043
3540	(3'-5')-cytidylyluridine*	Nucleotide	Dinucleotide	62399	LC/MS Neg	100020728	1522	548.104											422613				31132	71545			143981	113353	92556	416993	73350	296008		100520	433109		194072	198548			115796	153265	297519	209493				23209	43178
3541	(3'-5')-guanylylcytidine	Nucleotide	Dinucleotide	52746	LC/MS Neg	100009064	1670	587.126	4785-04-0	107595	96791				36024				441002				52926				107200	162303		121760		158306			257771		152821				54204	55986	642498	357197					37142
3542	(3'-5')-guanylyluridine	Nucleotide	Dinucleotide	52743	LC/MS Neg	100009056	1772	588.11	4785-07-03		32821064								419871				53323				113574	175875				110118			195554		320189				43309		1054821	354211
3543	(3'-5')-uridylylcytidine*	Nucleotide	Dinucleotide	62398	LC/MS Neg	100020729	1591	548.104											167487									17057	32093	251247		126528			157233		85761	98942				38512		156350					20821
3544	(3'-5')-uridylylguanosine	Nucleotide	Dinucleotide	52742	LC/MS Neg	100009057	1637	588.11	3474-04-02	107394	96654								286070								159164	73302	92369	506109	80665	272154			286050		115074	208784					83642	247937					70545
3538	(3'-5')-uridylyluridine	Nucleotide	Dinucleotide	52741	LC/MS Neg	100009058	1688	549.088	2415-43-2	102258	92384								352602			57196	37744				80236	162929	119881	194456	72121	160696		93447	469169		349416	110654			57432	118640	325899	246610					27938
174	(R)-salsolinol	Amino Acid	Tyrosine Metabolism	38665	LC/MS Pos Early	100002814	2525	180.102	70681-20-8	54456	49181	C09642	HMDB05199	1257615				2052450	6291106			3756852		2391364			480168	8487739		7348364	44748904	9263433	2868247	5981946	106199856		741335	5954023		1168379	5457772				6793902		3277702	6409050
4238	1,2-dilinolenoyl-digalactosylglycerol (18:3/18:3)	Xenobiotics	Food Component/Plant	54892	LC/MS Pos Late	100009392	1941	954.615																			308807			878302	221460	191190													1324175				795442
2229	1,2-dilinolenoyl-galactosylglycerol (18:3/18:3)*	Lipid	Glycolipid Metabolism	54891	LC/MS Pos Late	100010877	2046	792.562		5282287	4445458	C13871							305048								591066			1695593	112472	115540									141206				463515				167568
2225	1,2-dilinoleoyl-digalactosylglycerol (18:2/18:2)*	Lipid	Glycolipid Metabolism	54897	LC/MS Pos Late	100010873	2256	958.646			24785309								1494231								853169	174825	1290014	1492781	815007	1984526		322759	475301			531344			145046		239252	354779	1316701		392059	407045	188496
2226	1,2-dilinoleoyl-galactosylglycerol (18:2/18:2)*	Lipid	Glycolipid Metabolism	54899	LC/MS Pos Late	100010879	2415	796.593		6535011	5019375								885239								850688		642166	1095447	1134980	1160999		139653	737698						263821				776023			196750
1854	1,2-dilinoleoyl-GPC (18:2/18:2)	Lipid	Phosphatidylcholine (PC)	52603	LC/MS Pos Late	100008903	2006	782.569	998-06-1	5288075	4450312		HMDB08138	501049					2495877								859986		560071	986632	2280446	491162	329598					410296	892373	558214		624261			13482515		1470322	218741	162942
3785	1,3,7-trimethylurate	Xenobiotics	Xanthine Metabolism	34404	LC/MS Pos Early	100001397	1955	211.083	5415-44-1	79437	71754	C16361	HMDB02123	2412379	388226			4090738	385684	180766		177283	322503	1698238	792258	1527082		773527	124044	4507797	5371525	3191043		782315				2490683	354012	8342098	3496819	35364288	826566	5864312	356697		6614548	12934334	2942480
3782	1,3-dimethylurate	Xenobiotics	Xanthine Metabolism	32391	LC/MS Neg	100001106	1671.4	195.052	944-73-0	70346	63527		HMDB01857	71639	311547	163326	369068	198153	1518795	57414		140288	695905	217253	95639	93762	349635	742517	325495	1460206	717961	1176310	154061	517200	43745	99469	357708	1394140	673255	364667	393725	1812648	2292757	348724	476203		188014	704337	556567
4741	1,3-propanediol	Xenobiotics	Chemical	45434	LC/MS Pos Early	100001175	832	77.0597	504-63-2	10442	13839553	C02457						241071	867599	194743		359118	206234	218052		128809	240235								380290	72220	136545	780592		218322	134758		245024	827850	125156	110083
3783	1,7-dimethylurate	Xenobiotics	Xanthine Metabolism	34400	LC/MS Neg	100001399	1578.6	195.052	33868-03-0	91611	82720	C16356	HMDB11103	74838	7962115	5746997	5230479	518003	41821572	1152529	22908	7877714	13087576	716518			9578845	29582358		5432931	83538	3373204		52791128	6405691	3104774	7511547	942921	41561072	803704	792046	132658	54193060	3088205	7054131	1227856	47541	35641536	5111434
2284	1-(1-enyl-oleoyl)-GPE (P-18:1)*	Lipid	Lysoplasmalogen	44621	LC/MS Pos Late	100005372	1566	464.314						371018		284658		1661087	13067160			1585977	6458938	830856			4038160	178571	1661476	3316641	257754	3756088	2552988	767620	4735783	144603	858060	1934948	200407	641280	5165417	447344			377571			689264	634978
2256	1-(1-enyl-palmitoyl)-2-oleoyl-GPC (P-16:0/18:1)*	Lipid	Plasmalogen	52478	LC/MS Pos Late	100009007	2443	744.59						103934					701662					304484			1884741		2706138	671185	759462	2109009	283225	535477			702891			592925									170300
2250	1-(1-enyl-palmitoyl)-2-oleoyl-GPE (P-16:0/18:1)*	Lipid	Plasmalogen	52477	LC/MS Pos Late	100009005	2600	702.543			24769228		HMDB11342			340369	281949	398838		2177765			274487	1239468	1001522	1770283	95912		1477356	830995	727528	848627	916503	265262	327296										570774				626167
2282	1-(1-enyl-palmitoyl)-GPE (P-16:0)*	Lipid	Lysoplasmalogen	39270	LC/MS Pos Late	100003000	1558	438.298			10471193			1154170		858299		1207891	19900518			49252912	26355342	4391226			7774064		792386	9766254	670380	12226920	9014992	1678825	3262782	337444	2581176	5119572	1327461	465778	9382014	1603884			1239282			630877	1134139
2286	1-(1-enyl-stearoyl)-GPE (P-18:0)*	Lipid	Lysoplasmalogen	39271	LC/MS Pos Late	100003001	1649	466.329						668232			1733982	754216	2032423			1827886	969920	3508023			8635130	83040	2242371	2632937	934813	23137838	1761963	4203640	3080901	583872	4914788	1551399	535302	301453	760962	3269290		270845	1052051		305282	816967	1126531
259	1-carboxyethylleucine	Amino Acid	Leucine, Isoleucine and Valine Metabolism	62559	LC/MS Neg	100020425	2663	202.108						55882	17076				160951					137851			84616	61088		275195	55616	112843	133865	125299	43361		28611	242126	40780	252396	142299	448529	199287	28695	183278			244100
118	1-carboxyethylphenylalanine	Amino Acid	Phenylalanine Metabolism	62566	LC/MS Neg	100020419	2844	236.093			19276386			101626				50269	361626			40324	77002	108697			161970	205570	52302	381494	73011		23220	140136		56513	26224			263731	355868	760132	329265	88943				378917
316	1-carboxyethylvaline	Amino Acid	Leucine, Isoleucine and Valine Metabolism	62562	LC/MS Neg	100020423	2008	188.093						41373					125708					90556			94217	45045		97496	30423	65536	77781				43503	79335	51592	507812	52663	138619	131061		79662			107330
2305	1-linolenoylglycerol (18:3)	Lipid	Monoacylglycerol	34393	LC/MS Neg	100001435	6214	277.217	124151-74-2	53480978	21403134		HMDB11569		455367			651874	1498645								1124990		291627		1437380	743721		634439	235828		242695	677416	1198502				67675376	1039231	2632510		859525	246854	909477
2228	1-linoleoyl-2-linolenoyl-digalactosylglycerol (18:2/18:3)*	Lipid	Glycolipid Metabolism	54896	LC/MS Pos Late	100010872	2073	956.63			24785583																189688		154587	263735		559784													346316
2068	1-linoleoyl-GPC (18:2)	Lipid	Lysophospholipid	34419	LC/MS Pos Late	100001395	1465	520.34		11988421	10160888	C04100	HMDB10386						4589063								1863307		151244		1682798	1138640	180700	278628	226824		592062	670028	358488	305310	219189	759346	186127	271158	1564826			771024	268809
2304	1-linoleoylglycerol (18:2)	Lipid	Monoacylglycerol	27447	LC/MS Neg	100001040	6477	279.233	2277-28-3	5283469	4446589			4587249	12007358	37376876	12496919	6270395	16723490	14270494	775498	18537678	20005916	6462762	1282406	2934634	20862424	2002777	1409703	13967987	7734515	17919096	3900296	17643564	3020257	5664106	192640208	10896569	44045572	2837561	2618420	541256	1694088320	30709210	46204704		23355902	6871147	8087939
2301	1-margaroylglycerol (17:0)	Lipid	Monoacylglycerol	34391	LC/MS Neg	100001429	6571	269.249	68002-72-2	107036	96316			18799182	34513584	30774448	26068322	25077138	14924574	30702200	36964168	28748010	29478872	34669616	28074044	32254694	30178830	25765118	25382480	13852341	20815288	16363547	30672218	11447884	13973209	21299272	13404056	11776002	19881644	18214720	18524204	9857374	14401373	15201505	21940964	30023132	32149812	30857214	33291390
83	1-methyl-4-imidazoleacetate	Amino Acid	Histidine Metabolism	32350	LC/MS Pos Early	100001208	2064	141.066	2625-49-2	75810	68319	C05828	HMDB02820	18773404		2339334	668987		7246856			3631539	2140602	15246142	296743		12911254	2201036	23798330	16945328	20836600	10803855	8206130	5638363	8660953	4354195	2879517	52387060	6870124	41299648	13964226	18242442	2430924		5826640	167489		6412679	8939035
3867	1-methyl-beta-carboline-3-carboxylic acid	Xenobiotics	Food Component/Plant	43449	LC/MS Neg	100004434	3190	225.067	22329-38-0	5406157	4546099			154534					54068					83769	24287		59565	46073	5328504	214078	11369927	18883220	110402	62381	139447	84673	16242	48656892	109566	111332	59647	233734	120341		13911335	1999088	40340	148647	3334767
3413	1-methyladenine	Nucleotide	Purine Metabolism, Adenine containing	1527	LC/MS Pos Early	54	2133	150.077	5142-22-3	78821	71157	C02216	HMDB11599	5911888	886583	107142	62059		59899580	611725		6352097	3013055	4040852			96986472	8104923	6044124	10481943	10246550	6717351	17028914	4434286	24968356	8950328	2106724	7189407	10778368	9008787	4519773	5016014	7815473	3185747	11329826			10029021	6718235
428	1-methylguanidine	Amino Acid	Guanidino and Acetamido Metabolism	48114	LC/MS Pos Early	100000715	2149	74.0713	22661-87-6	10111	28576	C02294	HMDB01522	2128550					1014512			3284146		1442762		1071770	729003	1385231	1791332	992422	2117836	670962	1386310	941018	1665432	919693	1793864	685602	945176	2033530	1021454	1053896	957679	320804	790827			555001	326591
82	1-methylhistamine	Amino Acid	Histidine Metabolism	43831	LC/MS Pos Early	100001204	3040	126.103	501-75-7	3614	3488	C05127	HMDB00898	258955				142302	2824918	946995		6348704		4608198		102781	35939856	168948		31970914	593686	5967604		195540	672685	600269	17119988	5477463	739878	6186099	12272317		537856						2364282
3401	1-methylhypoxanthine	Nucleotide	Purine Metabolism, (Hypo)Xanthine/Inosine containing	57771	LC/MS Pos Early	100004644	1530	151.061	1125-39-9	70765	63930						204350		9537668								25599314	1259486	343542				687011	5965934	28984530	10453809	16758054		15877537				12829711
3565	1-methylnicotinamide	Cofactors and Vitamins	Nicotinate and Nicotinamide Metabolism	27665	LC/MS Pos Early	55	1940	137.071	1005-24-9	10129985	8305504	C02918	HMDB00699	192064			961502	212716	2795448			148476	544710				3856665	7592596	313530			235774	1604316	4400529		1779847	3443935	5466774	7447080		606970	687534	8599757	175073	110949		75514	406558
3780	1-methylurate	Xenobiotics	Xanthine Metabolism	34395	LC/MS Pos Early	100001400	1461	183.051	708-79-2	69726	62926	C16359	HMDB03099				5442595		19949754			4174942	5504786				9321498	1618396						12130579	446704	692373			8251641				9947351
3786	1-methylxanthine	Xenobiotics	Xanthine Metabolism	34389	LC/MS Neg	100001405	1568.8	165.042	6136-37-4	80220	72464	C16358	HMDB10738	201501		112741	5702319	270348	41106616		113313	6947668	15216412	405423			16841484	14535760	396480	195686	200222	142693	787687	30911564	15230433	8256213	15376232	400228	46081492	466088	85560		109751288		616577			572611	323546
2296	1-myristoylglycerol (14:0)	Lipid	Monoacylglycerol	35625	LC/MS Neg	100001618	6353.3	227.202	75685-84-6	79050	71382	C01885	HMDB11561	9441929	10742563	13934877	6673032	14904748	7808474	15767770	19130842	11348531	9690585		19461144	12664051	13791573	11827716	14871818	5630019	5670379	7624548	6890762	7284656	6939416	8269356	6571932	4890603	7870063	7835971	5367045	7117219	39595828	12999685	11197291	11374317	9696780	23008354	13454825
1843	1-oleoyl-2-linoleoyl-GPC (18:1/18:2)*	Lipid	Phosphatidylcholine (PC)	52453	LC/MS Pos Late	100008981	2165	784.585								533834	494233		2698787					243558		229913	1000970		1253519	3159059	1959186	1534145	539384	517715	316907			733140	1287379	968939	258374	3010146		280694	12427421		1822886	1116699	264512
2065	1-oleoyl-GPC (18:1)	Lipid	Lysophospholipid	48258	LC/MS Pos Late	100001272	1540	522.355	19420-56-5	16081932	17240641		HMDB02815			950593	509269		6854416								2021148	279502	144582	5768404	1049340	2503452	149430	443362			1896180	2421566	1596338	262497		2277317	340018	1499613	2035001			4518041	370584
2112	1-oleoyl-GPE (18:1)	Lipid	Lysophospholipid	35628	LC/MS Pos Late	100001569	1554	480.308	89576-29-4	9547071	7826021		HMDB11506	197263	556675	931338	1086007	925434	786575		468302	757787	2231050			752960	1112174	100985	3976696	2201430	621762	2151921	1314886	701736	1008708	117998	1383175	1624927	111096	151482	1207047	443372	137017	1744062	1081555		643130	448269	254440
2303	1-oleoylglycerol (18:1)	Lipid	Monoacylglycerol	21184	LC/MS Neg	100000924	6650	281.249	111-03-5	5283468	4446588		HMDB11567	17927182	25035008	58213392	26834276	22768176	168451584	26011256	16110238	51157840	44755208	32693696	21743912	28026288	44787260	17953560	22641242	45523256	19282404	28301620	25822524	28072746	26916322	17892878	32005850	21200314	101794000	18846152	15493977	8061788	2243740160	106225992	35732192	14712762	36424556	36811520	64277380
4239	1-palmitoyl-2-linolenoyl-digalactosylglycerol (16:0/18:3)	Xenobiotics	Food Component/Plant	54893	LC/MS Pos Late	100010875	2278	932.63			24785524								207476								342843	301902		501997		71517		182335											323062			1468710
2219	1-palmitoyl-2-linoleoyl-digalactosylglycerol (16:0/18:2)*	Lipid	Glycolipid Metabolism	54887	LC/MS Pos Late	100010874	2498	934.646			24785221								1399026								2920844	1166783	2013184	1231280	748843	1157616	279436	1192458	815052		822383	164164		578594	170438		512243	428177	1112495		308616	556791	190884
2220	1-palmitoyl-2-linoleoyl-galactosylglycerol (16:0/18:2)*	Lipid	Glycolipid Metabolism	54901	LC/MS Pos Late	100010893	2731	772.593			23326991				331260				2285270			552894		364512			10676104		1290177		544208	1647156	1771035	2585489	8709119	1224047	1063476			1263885		1055741			3153714			7264939	675675
1901	1-palmitoyl-2-linoleoyl-GPE (16:0/18:2)	Lipid	Phosphatidylethanolamine (PE)	42449	LC/MS Pos Late	100001870	2275	716.522		9546747	7825697		HMDB05322							4461138				493100	1247439	667046			4337234		859022		371747	161313										460061	2104020	520404	987751
1784	1-palmitoyl-2-oleoyl-GPC (16:0/18:1)	Lipid	Phosphatidylcholine (PC)	52461	LC/MS Pos Late	1539	2358	760.585	26853-31-6;26853-31-6	6436017	4940699		HMDB07972	1020401	1306730	2608968	5118496	701899	13629695	607670	329484	667446	451569	4270785	1567602	3096853	4389318	392782	10276080	15902145	10149882	20254434	2392046	5466410	2079152	778740	5181755	1044434	2178367	7088965	1098333	7636673	927593	1156248	7844364	645730	2383352	7754639	1914512
1900	1-palmitoyl-2-oleoyl-GPE (16:0/18:1)	Lipid	Phosphatidylethanolamine (PE)	19263	LC/MS Pos Late	1526	2509	718.538	26662-94-2	5283496	4446615		HMDB05320	387056	167421	2000343	1816045	126684		28103068		356901	732562	2639099	4643953	11855102			8105732		1711430	436518	2096324						200737					1935717	3269285	1448418	1778422		547535
1782	1-palmitoyl-2-stearoyl-GPC (16:0/18:0)	Lipid	Phosphatidylcholine (PC)	52616	LC/MS Pos Late	100008921	2653	762.601	59403-51-9		24766643		HMDB07970													689988	475036		1132679	722280	735250	662920			193378		1163960			317684									239251
2234	1-palmitoyl-galactosylglycerol (16:0)*	Lipid	Glycolipid Metabolism	62372	LC/MS Neg	100010885	6161	491.323		10413348	8588782			45216	350034			126475	232769	76740	99116	533237	104852			322745	1392906	463524	185475		264192	521747	759544	382370	2098822	1003583	884418	232501	85982		299817	101172	1805136		699074		199236	714085	400591
2055	1-palmitoyl-GPC (16:0)	Lipid	Lysophospholipid	33955	LC/MS Pos Late	100001263	1525	496.34	17364-16-8	86554	78064		HMDB10382	2662554	2892692	2099763	3827831	1366263	58253688	623531	687477	691022	790615	4620802	832674	1232754	27203048	1103568	3712621	53535908	4969015	36835088	1621617	7139669	11059700	852213	92049904	14632800	17332056	2596679	13340053	25801218	5627991	8173005	5558779		977597	18660088	1699414
2103	1-palmitoyl-GPE (16:0)	Lipid	Lysophospholipid	35631	LC/MS Pos Late	100001567	1544	454.293	53862-35-4	9547069	7826019		HMDB11503	3881582	11301501	22103184	4391141	12648749	21945856	3992351	7397185	14594650	52982888	12215643	1124838	3108783	39407980	389183	15622886	14659851	4122204	15499555	10389138	21734448	8782480	2716196	16857024	17974146	22356144	1564863	34844184	8223559	2513136	19840308	10483287		13988129	4185925	2027388
2141	1-palmitoyl-GPG (16:0)*	Lipid	Lysophospholipid	45970	LC/MS Pos Late	100005717	1617	485.287		3300276	2548639			181834				138508	200603			444145					463216	93883	138738	282012	371435	1378572		202722	465601	185406	1174380	204481	119043		338809	149542	314840	236244	479579			449431	170184
2148	1-palmitoyl-GPI (16:0)	Lipid	Lysophospholipid	35305	LC/MS Neg	100001655	5564	571.289					HMDB61695						5391391								2403418	130756				1336521	898189	295399		189207	1097495	472239			531026	259575	535415		1653724			294168	226555
2134	1-palmitoyl-GPS (16:0)*	Lipid	Lysophospholipid	46130	LC/MS Pos Late	100005805	1551	498.283		9547100	7826050								1324276			635969	838246				5960087				592684	1147089		92428			857580		156141						177564
2299	1-palmitoylglycerol (16:0)	Lipid	Monoacylglycerol	21127	LC/MS Neg	100000827	6550	255.233	542-44-9	14900	14201		HMDB31074	1641837056	2459429120	2321440000	2327071744	2341836032	1236305536	2359712000	2436041984	2463830528	2421000448	2568582144	2691566336	2507598080	2090781056	2057175680	2233101312	669364288	1523306112	1322386816	2405185280	1071819520	1259754624	1905891968	1185847552	1033274048	923712640	1729534080	1028817792	938377664	1149795584	1450078592	1952713600	2080315392	2766085632	2069255936	2943000064
2298	1-pentadecanoylglycerol (15:0)	Lipid	Monoacylglycerol	47898	LC/MS Neg	100001431	6200	241.217	104140-07-0	190750	165667			3775816	7419196	7115899	4885312	5857907	3303823	6393902	6329409	6282051	11770163	6431867	5851925	6863416	6162177	4846510	5207781	2549841	4805757	3473874	5188144	3462454	3261462	6680017	3504656	5593232	2441261	6003352	3101379	2301640	5643695	4475200	10589553	4607617	8680711	3923832	5883890
1819	1-stearoyl-2-oleoyl-GPC (18:0/18:1)	Lipid	Phosphatidylcholine (PC)	52438	LC/MS Pos Late	100008904	2644	788.616	56421-10-4		24766704		HMDB08038		266586	625210	1161934		2818316					807069		1181580	1081656		5059753	3319368	5805836	3498070	662626	767459			1118032		187138	3350327		2894180		122359	1017661		745066	1741027	290865
2063	1-stearoyl-GPC (18:0)	Lipid	Lysophospholipid	33961	LC/MS Pos Late	100001271	1606	524.371	19420-57-6	497299	435389		HMDB10384	255565	886481	1011765	1449370	353948	4420462			141321		1252694		650875	2541289	293805	2435636	5768183	3840103	7684521	767760	1594238	2060942	278468	12386812	1322937	658947	1718883	544883	2066214	2189646	395678	497292		781534	1688193	554679
2110	1-stearoyl-GPE (18:0)	Lipid	Lysophospholipid	42398	LC/MS Pos Late	100001461	1626	482.324	69747-55-3	9547068	7826018		HMDB11130	289438	437138	750325	551610	858695	2119397		151784	840388	1403921	1097260		706003	4520865	99729	2828501	2661012	1834140	4018263	1414632	979008	1218841	454488	2842550	1046843	128852	1218456	922370	900892	214185	423003	827167		212034	403891	460585
2143	1-stearoyl-GPG (18:0)	Lipid	Lysophospholipid	34437	LC/MS Neg	100001462	5816	511.304			21403138			180477					249085								3960424	171903	1179759	360804	707031	1148904	1250587	635627	1169315	763774	1692770	517682	225858	551309	480105	404943	807177		2008428			367950	783535
2151	1-stearoyl-GPI (18:0)	Lipid	Lysophospholipid	19324	LC/MS Neg	100000656	5794	599.32	796963-93-4		21403067		HMDB61696						661834								1199254	344098	290377	74070	179716	1946857	342658	310625	486305	238640	2163460	136715			58457	337529	776819		195827				269728
2135	1-stearoyl-GPS (18:0)*	Lipid	Lysophospholipid	45966	LC/MS Pos Late	100004327	1634	526.314		9547101	7826051			510745	161901		1058967	809588	898412			586840		2271810			2333818	126530	812149	405684	1399765	6792008	811754	1520595	578393	317185	11046819	183093	273573	178619		410395	438688	318717	646124		201006	324041	722954
1569	10-hydroxystearate	Lipid	Fatty Acid, Monohydroxy	47123	LC/MS Neg	100005852	5370	299.259		9561835	7838048		HMDB37396	596075328	39513208	18921290	33881952	119358112	2686208000	179316112	165802464	3948604672	38599848	988578688	4926449		456496256	613750592	3207194368	1712824704	3815457024	299172544	789713344	1486243840	2243926272	763885056	1750384512	1114990720	1829744512	635781760	971369408	305514720	3276239360	1413909760	1028309504	1021784192	84845000	7423902208	1000794432
2680	11-ketoetiocholanolone sulfate	Lipid	Androgenic Steroids	38167	LC/MS Neg	100002125	4420	383.153											743440			86671						282296						289255	158753								602596	220852
1578	12,13-DiHOME	Lipid	Fatty Acid, Dihydroxy	38395	LC/MS Neg	62	5137	313.238	263399-35-5	10236635	8412123	C14829	HMDB04705	5194620		1883139		332437	13267885	960462	748201	2621617	7760181	930554			10417692	4167774	716128	22517112	2986353	3604819	3253130	3956210	14071597	1261275	13564071	4573079	7919993	6032371	8166693	993804	19360520	2100460	2808600			5443102	1369788
2808	12-dehydrocholate	Lipid	Secondary Bile Acid Metabolism	44644	LC/MS Neg	100001072	4871	405.265	2458-08-4;2458-08-4	94235	85044		HMDB00400			241664			186080992				124664	1427481	121143		1161705	600701	334623	296909	257954	261512		212273	203731	92925	313904	154547	193239	621408	278418	142288	14233940	210467	1069975		39586	94112
1557	13-HODE + 9-HODE	Lipid	Fatty Acid, Monohydroxy	37752	LC/MS Neg	100002196	5275	295.228		43013				5637972	2615414	30269900	16932788	2651825	33489810	1918678	2015450	53045192		18816040		1081216	20159834	7402878	18616914	31375448	25719812	23881196	12358464	16104951	25316924	4798873	93104192	11974124	31048032	15166386	11292616	3957529	264361024	16617151	25591566	15502593	43491112	42416012	10982033
2683	16a-hydroxy DHEA 3-sulfate	Lipid	Androgenic Steroids	38168	LC/MS Neg	100002126	4240	383.153											226774				91600				24907	153615						910565			126505		74347				1102149	37466
3432	2'-deoxyadenosine	Nucleotide	Purine Metabolism, Adenine containing	1553	LC/MS Pos Early	211	2252	252.109	16373-93-6	13730	13135	C00559	HMDB00101	14515786		315873	626671		902817	346637			233572	275162		1341008	1195623	693517	7421464	60652504	15571876	99618080	9501981	2004513	33476832	1174264	36634468	18146708	207253	6361065	2541100	4479025	5926824	1021101	721517		71828	1497270	20374870
3518	2'-deoxycytidine	Nucleotide	Pyrimidine Metabolism, Cytidine containing	15949	LC/MS Pos Early	100000125	2193	228.098	951-77-9	13711	13117	C00881	HMDB00014	9600989					5984814			214427		964949			33860008	8341139	1756818	9496033	10431652	17239836	2738923	2613798	13236363	5096747	30414764	6841001	1196116	5039599	3488218	2111219	19712278	3010077	6070244		54002	12418740	14207671
3461	2'-deoxyguanosine	Nucleotide	Purine Metabolism, Guanine containing	1411	LC/MS Neg	348	1751	266.089	961-07-9	187790	163230	C00330	HMDB00085	264813			53124		3339437			75573		28609			2687854	1096124	557224	2682449	665252	4146727	232995	1108214	2938052	1057595	3077604	1758123			2055404	2035055	8128818	753174	277649		16817	258714	1433076
3394	2'-deoxyinosine	Nucleotide	Purine Metabolism, (Hypo)Xanthine/Inosine containing	15076	LC/MS Neg	100000135	1688	251.079	890-38-0	65058	58569	C05512	HMDB00071	801441		14524	42273		13665862			163237		94092			28150282	4193582	1415461	12759414	1879658	12892808	771647	3938280	14342555	2378615	2644880	12030820	23289		14135976	4446649	9306568	891181	1503138		46695	660678	14553122
3494	2'-deoxyuridine	Nucleotide	Pyrimidine Metabolism, Uracil containing	52602	LC/MS Neg	536	1586	227.067	951-78-0	13712	13118	C00526	HMDB00012	2497246	133072		178193	80986	2078267	52538		310468	147453	134844		81723	8282185	3825956	1369576	5650446	3588742	8843965	3542044	3841195	14278490	5979904	3502074	4490418	439285	2630620	5165717	7845992	12391625	578281	3179853			3896527	6145626
3519	2'-O-methylcytidine	Nucleotide	Pyrimidine Metabolism, Cytidine containing	57554	LC/MS Pos Early	100010895	2411	258.108	2140-72-9	150971	133067								2202998					675687		171188	1271729	3037853	2060599	1513617	2392310	1755863	1411224	479500	3971220	1162115	992222	835305	506914	1389839	833588	573706	1625924	648557	1816060		106361	1257895	1123401
3482	2'-O-methyluridine	Nucleotide	Pyrimidine Metabolism, Uracil containing	57655	LC/MS Neg	100010896	1831	257.078	2140-76-3	102212	92343			159933	124481				127086			265586	153398	153612		38332	274016	142138	243003	280139	286870	197955	604246	248090	720203	271263	53616	471939	319970	225383	100338	246794	189072	100687	534748			270624	490970
324	2,3-dihydroxy-2-methylbutyrate	Amino Acid	Leucine, Isoleucine and Valine Metabolism	57547	LC/MS Polar	100010869	1318	133.051	14868-24-7	301941	266858		HMDB29576						104549568			1560347	84195	1090742			7830501	705855	595738	413888	3341654	1592146	7846230		4300512		67403416	1422662	7077630	5897813			4686523	915364	1567809			326314
3896	2,3-dihydroxyisovalerate	Xenobiotics	Food Component/Plant	38276	LC/MS Polar	100002417	1050	133.051	1756-18-9	677	657	C04039	HMDB12141	315533					9338373			741320		419187			61082788	3791037	5070661	1206934	13028470	481151	1831547	1870472	2597112	1138316	526318	1888712	515172	2254095	1062195		10622557	274900	1165608			669211	243767
312	2,3-dimethylsuccinate	Amino Acid	Leucine, Isoleucine and Valine Metabolism	20703	LC/MS Polar	100000849	2800	145.051	13545-04-5	11848	11355			12230124	2180090	928701	1321985	4936518	11946357	1021065		5774423	3778484	11471340	411479	1452940	8065707	8100963	17158840	27273848	16618062	11837659	23264810	7316994	12745840	6708451	8390241	26450652	8210931	15821957	21199348	30690004	10518125	8174071	32118696		3035534	23555066	3971902
3712	2,4,6-trihydroxybenzoate	Xenobiotics	Benzoate Metabolism	35892	LC/MS Neg	100001718	1574	169.014	83-30-7	66520	59891		HMDB29649	168748		28818		282052	959843			113761		141448			1046223	157446	147150	141892	402133	2154097	324495	69043	329104	493175	696179	394178	194979	304644	183404		322050	122144	3971959	75047		142699	168782
4862	2,4-dihydroxyhydrocinnamate	Xenobiotics	Chemical	47113	LC/MS Neg	100005258	1759	181.051	5631-68-5	96384	87007								184753			195915								427692		136789	87091		157973		43140	136778	330579		1604683								56590
3899	2,8-quinolinediol	Xenobiotics	Food Component/Plant	42975	LC/MS Pos Early	100004206	2514	162.055	15450-76-7	97250	87777	C06342						151076								427402		1076261	388925	110326	34794588	366098	27240750			400941			731509		585834		1728732	145693				251768	4244453
4306	2-acetamidobutanoate	Xenobiotics	Bacterial/Fungal	53232	LC/MS Polar	100009237	1340	144.067		306107	270613			1163335				334151	723338					3999816			856319	1889902	335754	3416238		328346	3341762		641469	787773	2837894	528839	2085115	1570173	1232468		2264122
102	2-aminoadipate	Amino Acid	Lysine Metabolism	6146	LC/MS Polar	381	3500	160.062	542-32-5;1118-90-7	469	456	C00956	HMDB00510	1497776					927117				271904	250949			630243	317691		435842	560736		907460	2324276	377289	252658	550527	674025	603385	502116	601907	289195	549415	638092				490181
442	2-aminobutyrate	Amino Acid	Glutathione Metabolism	42374	LC/MS Polar	1128	2451.5	102.056	1492-24-6	439691	388757	C02261	HMDB00650	139710					675690					324023			2236669	1318632	3938255		1882966	424090	11621100	383002	1289551	203236	1335756	1340504	1218168	1914205	666070	1254615	2110336		1152628			123850	997613
1386	2-aminoheptanoate	Lipid	Fatty Acid, Amino	43761	LC/MS Pos Early	100004542	3160	146.118	1115-90-8	227939	198338			31794288	129319		398750			94726			378877	318053			1044664	2466428	340309	5296924		1353421	665871				640315	639868	321421	2681100	264061	872609	1846647	1182344	3917599			3584828	349544
252	2-aminophenol	Amino Acid	Tryptophan Metabolism	38109	LC/MS Pos Early	100002382	2644	110.06	95-55-6	5801	5596	C01987		9097784	2902086	4332111	1692956	3294683	4180338	1730090	898743	5415079	7669629	9487853	558773	1180796	29784772	1278980	1448901	7297268	1673821	3681151	8305728	3189344	6133995	10947969	9437722	7595651	4727491	972930	4024319	2200950	2223061	1521014	1370506	2216014	1759809	2399755	1573540
984	2-deoxyribose	Carbohydrate	Pentose Metabolism	537	LC/MS Polar	909	1216	179.056	533-67-5	22833604	4573703	C01801	HMDB03224	961446					20915146			1229382		930599		146604	23977960	6144165	6841015	9475912	5453683	5334103	14293725	11038446	17380306	7801770	1075973	8645681	9447661	4347753	11466745	10142774	3097134	372195	15005959			9976424	5712526
319	2-hydroxy-3-methylvalerate	Amino Acid	Leucine, Isoleucine and Valine Metabolism	36746	LC/MS Neg	100001541	1800	131.071	488-15-3	164623	144317		HMDB00317	4674168	2853470	179370	82539	1063463	3359856	466131		6230991	439338	8732207		232671	36932724	1146515	4489090	1338187	1595787	852133	50270788	1157680	1557166	3342757	7453763	12715587	2694868	146591184	348316	5291807	24200376	229459	8823132		95820	528415	7926183
1527	2-hydroxyarachidate*	Lipid	Fatty Acid, Monohydroxy	61700	LC/MS Neg	100019892	5990	327.29		5225199	4395406			30857744	35443104	42139932	34633504	49461760	24656472	39817664	12509895	258239344	61326288	57613328	7166226	159025264	32747778	14098028	42916956	5966977	97348760	10662453	81793408	1702000	69040760	28254052	19169204	8502101	7133355	210679984	12392482	6372951	3337320	44272912	23807462	24329852	40302220	14694454	42738440
1528	2-hydroxybehenate	Lipid	Fatty Acid, Monohydroxy	57663	LC/MS Neg	100015637	6384	355.322		193484	167899			26258780	111252600	154923344	165497792	128271408	40044688	125035504	38173088	301947680	62754580	119523928	58062484	326925216	55409012	14619930	27892796	3322952	53090376	16587804	145280240	1791286	31017588	43491432	14785247	8401997	7618665	92738392	11424990	12877442	2283444	76167832	55041412	125053656	217068688	16450019	56204400
444	2-hydroxybutyrate/2-hydroxyisobutyrate	Amino Acid	Glutathione Metabolism	52281	LC/MS Polar	100008928	1258	103.04						12191121	8776566	1033364	829386	2422746	5557532	1402953	682651	3393763	1830090	15072928		961377	22386568	1331453	7016060	5272681	3939176	3728496	7915577	1480862	7067794	1968222	42950820	9528980	6215569	25452084	7868979	3396032	39166724	2836610	2418377			1916185	3507340
1521	2-hydroxydecanoate	Lipid	Fatty Acid, Monohydroxy	42489	LC/MS Neg	100004089	4840	187.134	5393-81-7	21488	20195			626786				104345	782751					192509			338173	204753	100739	1273171	169358	266069	151814	315491	626553	164224	471601	328590	685595	322799	906360	401096	661193	331904	494228	132543	306399	1295809	169141
1311	2-hydroxyglutarate	Lipid	Fatty Acid, Dicarboxylate	52294	LC/MS Pos Early	100002070	958	166.071	40951-21-1	43	42	C02630	HMDB00606	2860419	3233132	238636	522898	2365745	2413172	612438		8358169	2462890	10781961	88636	1154112	8369378	2710357	15242224	842486	10344629	706195	34244168	2687293	3860861	4543453	120645	18471716	8545066	40862636	767528	3855673	1020588	2071279	13556160		758793	1178902	11100442
1519	2-hydroxyheptanoate*	Lipid	Fatty Acid, Monohydroxy	61827	LC/MS Neg	100019960	2900	145.087		2750949	2032206			127659					98130				193081					61592	95573	212237	83121	288866	60998				122626	142133		187770	200560	93593	267970	91261	65493		43812	204417
4357	2-hydroxyibuprofen	Xenobiotics	Drug - Analgesics, Anesthetics	43330	LC/MS Neg	100004169	3462	221.118	51146-55-5	10443535			HMDB60920																	804782																	413001
1522	2-hydroxylaurate	Lipid	Fatty Acid, Monohydroxy	52916	LC/MS Neg	100008934	5211	215.165	2984-55-6	97783	88259			592374	469906	193885	472325	140469	397218	101555	81680	363690	79272	272251	135498	421520	196869	70653	213803	600625	270588	191897	383130	111779	568406	229967	109094	425880	569147	400593	488475	627524	341470	164947	271168	163560		626168	153901
1529	2-hydroxylignocerate*	Lipid	Fatty Acid, Monohydroxy	61699	LC/MS Polar	100019894	710	383.353		102430	92507	C17873	HMDB39540		11945103	27602120	15182147	20755528	6696674	70719336	7231846			4408898	89072368	45522624	4510847	2696172	8400010		49330948		79774480		8147138	14427188		11259742		37820324	4831032			9379155	19453740	202102160	49569832	4204326	29009194
1523	2-hydroxymyristate	Lipid	Fatty Acid, Monohydroxy	32413	LC/MS Neg	100001180	5364	243.197	2507-55-3	1563	1508	C13790	HMDB02261	5354010	6068190	2852297	5471345		3974128	284510	711106	7512763	9684624	4832270	350939	2822752	4491003	1166098	3626709	2568606	5112583	1952686	4073111	131480	6775235	4545768	977963	3123083	6561345	8376566	5450836	2728745	1838865	3973626	2366305			4756976	2033566
1530	2-hydroxynervonate*	Lipid	Fatty Acid, Monohydroxy	61698	LC/MS Neg	100015638	6345	381.337		5312783	4472208			78108872	201993968	157029040	127067712	96519056	99242232	59243556	46974176	528295648	588515840	301040384	69815568	276075456	133961136	18082560	297327200	25843148	169923504	54515908	227022304	1590775	58706844	95015568	54827324	36301120	59663704	203540144	37799048	29422598	7383222	84267368	82809176	59247172	67782424	30370034	104720544
1520	2-hydroxyoctanoate	Lipid	Fatty Acid, Monohydroxy	22036	LC/MS Neg	100000743	3736.8	159.103	617-73-2	94180	84994		HMDB02264	450181																103834		370153	95757														135869	651964
1525	2-hydroxyoleate	Lipid	Fatty Acid, Monohydroxy	54920	LC/MS Neg	100010866	5560	297.244	56472-29-8	9796304	7972070			6370860		18482658		10105501	13022526	4943127	627123	4901030	3375000	2724138		594202	17411684	4948921	19305308		14067287	3374796	10504913	2272990	10203082	9349453	4840020		9574494	25775448	4733908	4133765	3270083	6581445		4241461			9645722
1524	2-hydroxypalmitate	Lipid	Fatty Acid, Monohydroxy	35675	LC/MS Neg	100001579	5511.2	271.228	764-67-0	92836	83805		HMDB31057	329686752	16280715	71907848	23800236	46653000	456470752	79917008	44422952	1553591936	73406840	407465504	9183856	30919966	671841792	68563320	420191168	145230288	398144640	109477008	355884960	4215376	484257824	305112704	97253800	195737248	163292496	713826368	298444352	159541184	48303180	179251984	148490688	71086136	159418336	154282944	185246544
180	2-hydroxyphenylacetate	Amino Acid	Tyrosine Metabolism	1432	LC/MS Neg	235	2164.6	151.04	614-75-5	11970	11476	C05852	HMDB00669	434162					534217					386529			731540	101463	176371	962285	178005	136298	253439		598712		427035	268860	144927	195584	49978	135319
1526	2-hydroxystearate	Lipid	Fatty Acid, Monohydroxy	17945	LC/MS Neg	1239	5695	299.259	629-22-1	69417	62625	C03045		32459930	6845402	3480298	6503776	5368776	39698128	4521732	1804594	21620524	11417190	8131215	1625805	10875684	50307864	10585002	76219368	10332939	85622016	15164159	73237152	2397560	46763496	65936344	14603261	13400986	15567119	131120640	25560376	15241294	5336104	34602312	25614646	2672448	6648761	17751268	30857902
3903	2-isopropylmalate	Xenobiotics	Food Component/Plant	15667	LC/MS Polar	100000409	2605	175.061	3237-44-3	77	76	C02504	HMDB00402	4624165	3114849	211138		6543927	1322074624	1417903		55063356	4600729	12192948		372062	890411072	11645242	16184285	4425691	31870548	4700670	29927794	14287786	19776426	3347074	40624836	4990773	4664939	13307919	2105890	2753724	36760876	13596503	38020728		1142438	5231319	3152412
2319	2-linoleoylglycerol (18:2)	Lipid	Monoacylglycerol	32506	LC/MS Neg	100000987	6250	279.233	3443-82-1	5365676	4517636		HMDB11538	1944165	1886633	5515189	870773	824285	2905376	1808561		4646413	3497982	2146087	527296	855984				1640424	1012168	2898874	832540	7101996	539695	1092700	46225032	2610620	6291083	710797	697404		175962160	8925728	6207673		3087708		2141002
1143	2-methylcitrate/homocitrate	Energy	TCA Cycle	52282	LC/MS Neg	100008929	575	205.035						3496583	144996			68387	4768730	151887	96970	534794	91682	256710			5291347	606420	1608969	1123914	1229891	781525	1893684	1767819	474763	1084487	519181	3729540	343550	739115	567937	678711	1364305	316468	2538184		143173	1549312	790777
1151	2-methylmalonylcarnitine (C4-DC)	Lipid	Fatty Acid Synthesis	35482	LC/MS Pos Early	100001596	2440	262.129	149181-64-6	53481628	21403178		HMDB13133	657221	402983			274689	2761987			562022		3042979			3380311	523338	9131362	3150408	6889157	1226738	1976446	6196047	362566	3881705		4614748	2333230		15807879	1281510	1621479	1461676	379015			3922735	2000028
15	2-methylserine	Amino Acid	Glycine, Serine and Threonine Metabolism	53229	LC/MS Pos Early	100009246	1652	120.066		94309	85112	C02115		6104500	7860673	921351	1060344	2936009	14795313	2071066		3308888	1612947	7213003		4581179	21354924	4307913	7540773		17983494	4115745	2656835	2330370		2136189	2372498	2972189	14855891	1934579	3242674			2373007			680447	5138983
2318	2-oleoylglycerol (18:1)	Lipid	Monoacylglycerol	21232	LC/MS Neg	100000943	6500	281.249	3443-84-3	5319879	4478086		HMDB11537	5140333	5076629	13387806	8397880	3543939	36853364	7318702	3076491	16358507	12049729		2385795	6769494	10219080	3181755	4835271	9162763	6600940	7289284	7687791	10757875	7690178	3905277	10470007	8715831	13849746	6391321	5712910	3286167	228940208	27896468	11633509	5405438	13690624	18740260	11423758
3904	2-oxindole-3-acetate	Xenobiotics	Food Component/Plant	40479	LC/MS Pos Early	100003109	2378	192.066	2971-31-5	3080590	2338343		HMDB35514	43003296	1180402		2289643		37806648	998993	603571	4959775	4546129	349990			16102778	14960158	2573189	15263411	4094616	13177397	1318174	56479196	44226912	27036344	26279832	1008381	32729730	34046712	51693480	15517573	28285420	48759612	8556751		30561552	4518016	1961730
4752	2-oxo-1-pyrrolidinepropionate	Xenobiotics	Chemical	40452	LC/MS Pos Early	100003265	1600	158.081	77191-38-9	3146688	2398914			5393526	4564477	1823074	2374875	3175261	6656558	7854998	535310	9854187	8119560	6990422	2229523	3627058	5623449	3251768	3267688	8172801	8240410	5702000	3960654	4348258	5763614	3459969	1719485	8593686	4872394	3695141	5230075	11534531	5348612	7039248	3985579	3234456	2852027	9408867	1137326
372	2-oxoarginine*	Amino Acid	Urea cycle; Arginine and Proline Metabolism	55072	LC/MS Pos Early	100002784	1760	174.087	3715-10-04	558	542	C03771	HMDB04225	3704688	1844017	223892	215267	2380616	5152912	810796		3023433	2630372	1909846	74508	583179	12045575	6280276	2670875	1058140	9709081	1920549	3068757	2160378	8189274	1546575	3645421	2564435	1464235	3045361	1636183	5640567	9442347	946669	4385361	135850	412780	4097131	2665034
2315	2-palmitoylglycerol (16:0)	Lipid	Monoacylglycerol	33419	LC/MS Neg	100001048	6400	255.233	23470-00-0	123409	110006		HMDB11533	71074024	217981696	211906592	205592432	160402048	67210352	187289264	171823168	200536000	234102256	146154464	226333328	233798688	109400784	92745888	163557120	43087564	75616472	53976104	118228672	41371604	66233816	74516448	55883568	46434488	52948060	80196016	52834176	48914064	54622984	62472512	94176896	148362800	292572992	100566176	132227536
3812	2-piperidinone	Xenobiotics	Food Component/Plant	43400	LC/MS Pos Early	100004295	1675	100.076	675-20-7	12665	12144		HMDB11749	330362656	90896384	32559294	22703344	84584032	1085687296	65129476	48176808	96661984	75751640	487345312	16842556	32800096	163411632	16337551	32106182	329299424	21553514	112092024	116724944	35788876	99711664	43945792	871851392	268355040	397177888	353052640	106493616	143431248	74021968	46456008	119052624	20797770	8154942	32695908	43589668
57	2-pyrrolidinone	Amino Acid	Glutamate Metabolism	31675	LC/MS Pos Early	100001081	1262	86.06	616-45-5	12025	11530		HMDB02039	341558624	1388112384	608642432	813593664	1541761408	59361192	2239539456	206085392	1667911680	1963384448	1712554496	1099081344	962810816	41168736	20257372	15291448	18720676	10433002	31898364	18132544	31030572	32121066	16212921	36251636	106529664	25280380	25141808	42137316	55491024	35160856	1054615168	10276305	996701760	790018944	7382696	9236505
3901	20-hydroxyecdysone	Xenobiotics	Food Component/Plant	27446	LC/MS Neg	100001037	4021	479.301	5289-74-7	5459840	4573597	C02633	HMDB30180						568175					31744																					672732
166	3,4-dihydroxyphenylacetate	Amino Acid	Tyrosine Metabolism	18296	LC/MS Neg	100000449	1040	123.045	102-32-9	547	532	C01161	HMDB01336						10773902					94877			1480835	382513		151760							2661116		106584	58020			1373922	60845
3784	3,7-dimethylurate	Xenobiotics	Xanthine Metabolism	34399	LC/MS Neg	100001398	1418.2	195.052	13087-49-5	83126	74994	C16360	HMDB01982	71923	916482	316812	491753	254986	2688492	34316		450590	1271298	51081			132277	1042856	454066	2735374	327105	1046218	486462	1334316	1217506	223944	469782	1139776	2229222	160017	190170	66030	3275137	269882	1279140	38613	19872	1138135	196807
3748	3-(2-hydroxyphenyl)propionate	Xenobiotics	Benzoate Metabolism	35634	LC/MS Neg	100001623	2530	165.056	495-78-3	873	850	C01198	HMDB33752	137806				261893				333526	265481	309573			2239512	266651	418048	1454701	199139	995697	1434784		2592714	128238		460110	278816	140073	2014410			585368	183896			127749	184505
3772	3-(3-hydroxyphenyl)propionate	Xenobiotics	Benzoate Metabolism	35635	LC/MS Neg	100001624	1980	165.056	621-54-5	91	89	C11457	HMDB00375	1788783		3086725		6725837	3811203840	544457		286400960	214710	3623964			4165575	18821782	5080315	49987992	4544281	56484320	14624102	3453020	8937837	674151	305747520	6618012	335628832	2853183	492881696	4739877	3066159616	6386208	4973021	439418	2452591	1633349	2958846
3769	3-(3-hydroxyphenyl)propionate sulfate	Xenobiotics	Benzoate Metabolism	45415	LC/MS Neg	100005391	1294	245.013	86321-32-6	187488	162993								38451708			275982						103185			33879	58843					518545		579945		122304		2058997	32321
145	3-(4-hydroxyphenyl)lactate	Amino Acid	Tyrosine Metabolism	32197	LC/MS Neg	240	1379	181.051	6482-98-0	9378	9010	C03672	HMDB00755	2831174	3380803	100592	199770	1563597	7994939	458845		2806985	1437516	6891996		539861	77290288	479761	8904012	2321526	4386124	1108608	49596712	4454948	1707487	13303133	670799	12668767	24814268	47850524	3394216	5338695	46048348	123554	7359470		198522	6266591	7220114
3773	3-(4-hydroxyphenyl)propionate	Xenobiotics	Benzoate Metabolism	39587	LC/MS Neg	100002914	1670	165.056	501-97-3	10394	9965	C01744	HMDB02199	683992		396886		4204771	63741080			31601762		10345567			1243151	1066876	1434832	59899244	381603	4164177	4947169	490514	965639	577836	6304913	2406052	42841492	3651776	7939856	154877	34828120	248027	4609126		104189	880079	339561
3533	3-aminoisobutyrate	Nucleotide	Pyrimidine Metabolism, Thymine containing	1566	LC/MS Pos Early	1114	2190	104.071	10569-72-9;214139-20-5	64956	58481	C05145	HMDB03911	2178377	1156083			1434699	928115	1002632		1389218	800183	2200203		1730358	1323953	839921	712333	1037930			2122074		1841925		2885753	2956976	1262300	1708529		474839	2749038		858355		751403	5215365
1344	3-carboxy-4-methyl-5-pentyl-2-furanpropionate (3-CMPFP)**	Lipid	Fatty Acid, Dicarboxylate	61871	LC/MS Neg	100020004	4000	267.124		194501	168762			720096					1188260					182990			1136375	270108	559900	1389737	329964	323546	230260	458161	1597759	309182	848970	2034128	1536198	1372931	460542	2122556	409390	377914	260471		30167	679853	413261
1342	3-carboxy-4-methyl-5-propyl-2-furanpropanoate (CMPF)	Lipid	Fatty Acid, Dicarboxylate	31787	LC/MS Neg	100001178	2800	239.092	86879-39-2	123979	110498		HMDB61112	151936					171067										218057		35019	86964		101357	416767		70497	476652	20945	113061	118802	118305		99812				85281	53260
1314	3-carboxyadipate	Lipid	Fatty Acid, Dicarboxylate	54723	LC/MS Neg	100009325	571	189.04	923-42-2	222467	193135			576980	145245	105317		431296	1293431	144412		450010	257006	548268			1004748	333527	2261208	835397	2678638	399275	1550527	1983119	289204	771190	198103	8757318	607831	1483946	286716	344933	611455	2312048	1374456	487101	480115	1110491	751006
3862	3-dehydroshikimate	Xenobiotics	Food Component/Plant	36764	LC/MS Polar	100001679	1962	171.03	2922-42-1	80	79	C02637				75744			1853333			1259826		345001			9303031				371055	84923	190148		721668	174121	738043	534378		321990			7549250
2547	3-hydroxy-3-methylglutarate	Lipid	Mevalonate Metabolism	531	LC/MS Polar	112	2850	161.046	503-49-1	1662	4573695	C03761	HMDB00355	110684200	18810048	6674197	3218525	23434228	264039680	9085911	804677	35379724	13218189	48771740	834918	4251818	1316263808	46139716	34098164	46543132	80796440	59361068	131460944	62615536	276188128	133404584	57204016	60748148	109224048	26404048	24052568	31450058	76655904	21187120	52730872	1241207	4798419	25115988	69933280
1316	3-hydroxyadipate*	Lipid	Fatty Acid, Dicarboxylate	62069	LC/MS Polar	100004396	3131	161.046		151913	133894		HMDB00345	9715775	1213980	1023623	904435	2374067	22798284	1721908	436417	5098805	2665533	3810950		1254693	62995172	3410347	1973819	1048776	5132778	45394572	4057124	4111904	8084228	1966596	8885175	5073523	5297910	3406148	4584372	2947349	12986157	13939242	94663184	679549	830559	1561342	1400291
3711	3-hydroxybenzoate	Xenobiotics	Benzoate Metabolism	15673	LC/MS Neg	100000013	1141	137.024	99-06-9	7420	7142	C00587	HMDB02466						1596873			410784		101788			209357	644557		906524	100906	874980			920194	30183	539465	194122	1326508		307057	277878	2277901	315620	254828		121766	378036
1501	3-hydroxybutyrate (BHBA)	Lipid	Ketone Bodies	542	LC/MS Polar	254	1444	103.04	625-72-9	441	428	C01089	HMDB00357		784833		888178	421023	2371594	788126	554025	1346700	726276		294277	595189	5124088	3088363	3458302	1606832	1068086	1431558	3582302	4211686	10779114	2118750	3526928	2970042	825859	1010492	978931	1166182	22109558	505803	1780672			4813021	677630
1536	3-hydroxydecanoate	Lipid	Fatty Acid, Monohydroxy	22053	LC/MS Neg	100000997	4634.7	187.134	5561-87-5	26612	24790		HMDB02203	372413	169913			118153	225619	51018		175559	155719	105055			335760	180882	119550	250924	219748	829828	279185	150953	285801	388521	510356	181216	383668	431094	221294	111332	396345	137220	492800	45869		328170	314740
1533	3-hydroxyhexanoate	Lipid	Fatty Acid, Monohydroxy	53230	LC/MS Neg	100006367	1725	131.071	10191-24-9	151492	133518			114164		112660		56767	584244					98160			1593408	402140	132220	1780599		967630	111668		1381727	233335	430466		704640	1463791	311914		894143	90251	274710			219345	140800
1538	3-hydroxylaurate	Lipid	Fatty Acid, Monohydroxy	32457	LC/MS Neg	100001112	5175	215.165	53941-38-1	94216	85026		HMDB00387	1347425	643101	304857	394198	158816	1038939	159772	140870	462920	785705	335294	234947	309947	1728369	148261	624652	2142908	231731	323671	477774	175701	479360	345273	535026	1313610	1539866	541536	842628	702620	1384139	213715	1204552	139483	169474	707320	419937
1540	3-hydroxymyristate	Lipid	Fatty Acid, Monohydroxy	21158	LC/MS Neg	100000882	5335	243.197	3422-31-9	16064	15252			7919419	2866210	1895207	1852295	940120	3590757	1138428	508106	8152910	7497865	2801129	951509	2552993	9108834	944363	6963353	19695976	992178	2727106	4736441	865978	1647704	1145624	958150	14534660	3484083	5795480	3335343	2504140	2236167	672951	6907050		1217519	2081722	3694192
1534	3-hydroxyoctanoate	Lipid	Fatty Acid, Monohydroxy	22001	LC/MS Neg	100000773	3446	159.103	88930-08-9	26613	24791		HMDB01954	100929		96039			346137								393756	128120	57890	314762	61188	503294	112793		361949	100592	188709	92819	229399	348118	146412		335844	106126	147380			192241
1542	3-hydroxyoleate*	Lipid	Fatty Acid, Monohydroxy	61843	LC/MS Neg	100019966	5508	297.244						3657038	3378341	4814038	2785973			4647149	4232230	5569102	738488	2094339		5379524			3753841	15343673		1147545	25080246	639865	5322105			56571248			3206182		1786499	5600229	39491040	30784256	120311456	134476112	7504400
1458	3-hydroxyoleoylcarnitine	Lipid	Fatty Acid Metabolism(Acyl Carnitine)	61840	LC/MS Pos Late	100019801	1406	442.353			48061587								7847094								42178480	317397		6057121	408847	705227		856527			3714430	672841	3354615	773351	535386		3066778		428747			287565
1541	3-hydroxypalmitate	Lipid	Fatty Acid, Monohydroxy	27503	LC/MS Neg	100000983	5476	271.228	928-17-6	301590	266538		HMDB10734	32140554	5711159	5760393		3591832	44864016	5850110	1210298	74635440	2166500	26209748			43205688	9024007	11845898	79188712		10769676	75865032	2146185			3153087	51585204	5078959	25272956	19032380	9396878	7348353	7754045	67771760	4124221	3825563	8862390	29252620
1493	3-hydroxypalmitoylcarnitine	Lipid	Fatty Acid Metabolism(Acyl Carnitine)	61839	LC/MS Pos Late	100019800	1380	416.337											7592320								9202268	255745		1004898	836616	809678	284047	746624	451477	385421	1199143		1153327	256408	233182	429983	3518242		480164			145654	226518
128	3-hydroxyphenylacetate	Amino Acid	Phenylalanine Metabolism	1413	LC/MS Polar	114	1220	151.04	621-37-4	12122	5323739	C05593	HMDB00440	1359529	1273882	1238245	1700929	1163208		1359356		8783347	1498455	3477627				700938	930171	2794074	2889751	14807884	1251027		27572834	2630805	3850995	3649428		1100317	7420783			4222126	6098833		1416094	910595	5180347
4452	3-hydroxyquinine	Xenobiotics	Drug - Antibiotic	43496	LC/MS Pos Early	100002410	3271	341.186	78549-61-8	441264	138373	C07344	HMDB01091						227111																			4022404
1537	3-hydroxysebacate	Lipid	Fatty Acid, Monohydroxy	31943	LC/MS Neg	100001145	1282	217.108	73141-46-5	3017884	2285525		HMDB00350	197319					704210			160807	89152				409249	154906		1062579	474833	48023		228094	2135032	207289	189071	108945	311105	75469	131284		282919	304528	311740
4142	3-hydroxystachydrine*	Xenobiotics	Food Component/Plant	62062	LC/MS Pos Early	100020203	1049	160.097		442640	391002					380678			99317328		402320	685105		1110109			6111578	138372				780882				3210164	6550060	1149413	110685856		4354573		728700	3053455	280253			134158
1572	3-hydroxystearate	Lipid	Fatty Acid, Monohydroxy	52938	LC/MS Neg	100008933	5674	299.259	45261-96-9	5282907	4446034			5432124	6304330	19257928	3856454	4234715	4039052		509978	7216353	3840649	27805722		16935710	6564849	1702466	26638664	27658392	22942448	3129660	117336240	1017948	16952428	3053350	2032390	127422712	1272638	11053573	10434626	4515133		37221516	75094160	12345834	75773944	370116832	40339912
2411	3-ketosphinganine	Lipid	Sphingolipid Synthesis	34381	LC/MS Pos Late	100001436	1400	300.29	18944-28-0	631	611	C02934	HMDB01480						25190596								11454376	767079		2928164	4253132	3070531		2962545	1678861	3163892	13650516	3012149	1374386	4563226	9287916	4688806	5298410		3990252			4628412	1767026
318	3-methyl-2-oxobutyrate	Amino Acid	Leucine, Isoleucine and Valine Metabolism	44526	LC/MS Polar	100000936	911	115.04	3715-29-5	49	48	C00141	HMDB00019	1727898					13990856			1736104		1651749	364436	256834	35682756	1942822	43356308		37113960	2163617	49374344	10900795	5593692	2818246		18852634	7201834	21765948	542420	10978570			23963916			5670712	10194004
296	3-methyl-2-oxovalerate	Amino Acid	Leucine, Isoleucine and Valine Metabolism	15676	LC/MS Neg	100000036	2064.2	129.056	1460-34-0;51829-07-3	47	46	C00671	HMDB03736	10499087				512333	35034544	190363		2733001	571801	3171188			60409256	4608330	53724652	3561535	48007204	3511056	74753008	23197252	9772988	18235422	7281993	21456386	17314356	27259840	3481602	27211580	4272708	325821	21510696			9157791	9427280
1317	3-methyladipate	Lipid	Fatty Acid, Dicarboxylate	36749	LC/MS Polar	100001765	2865	159.066	3058-01-03	12292	11789		HMDB00555	10926833	7953194	358598		25133324	2260601	2436422				28588578			21770420	1420366	25942762	4889167	2987999	59183824	114066360	3309370	4102261	11869244	1457741	7218763	1995751	41769800	3242346	81586056	1073802	1387701	2839220	2004193	14268354	47826168	34842632
1310	3-methylglutarate/2-methylglutarate	Lipid	Fatty Acid, Dicarboxylate	54676	LC/MS Polar	100010834	2832	145.051			11781		HMDB00752	100342040	3682366	1888094	1007602	4607816	6954289	5583006		3918752	3578723	11263744	389386	2522396	24103440	5333572	17017468	24037664	16793120	9332106	49995952	42409112	18938872	132451912	4931195	36232188	4891730	30792968	18927662	30227244	7804577	9003322	11477695	752075	3311671	14111650	7040012
67	3-methylhistidine	Amino Acid	Histidine Metabolism	15677	LC/MS Pos Early	100000042	2670	170.092	368-16-1	64969	58494	C01152	HMDB00479	38271196	889382			952468	74039992	3997110	897224	26127912		4627611			10940610	4819172	951988	7054739	1127191	1354929	8235550	4480981	53409804	13783383	336271488	7363376	8392058	16706984	4568743	2534433	9413539	15148049	3614688		400051	4562790	883776
3787	3-methylxanthine	Xenobiotics	Xanthine Metabolism	32445	LC/MS Pos Early	100001108	1415	167.056	1076-22-8	70639	63805	C16357	HMDB01886		375873	392044	948894		4225433			458015	643521				673370	2081526						1015268	948374	336880	453299		2416241				3191270	193398	326738			549416
3774	3-phenylpropionate (hydrocinnamate)	Xenobiotics	Benzoate Metabolism	15749	LC/MS Neg	100000010	2860	149.061	501-52-0	107	10181339	C05629	HMDB00764	56336376	6402200	39348728	2175416	15720961	27620706	5572687	2135921	6162478	23318782	110190752	2543314	887471	252829120	242284688	16106438	638944896	31757284	394320608	99844208	49912380	389036928	107805536	81171304	206352528	918538304	217586544	593366208	36073428	8651186	85894808	62638876	2049961	27087136	139394512	84307064
363	3-sulfo-L-alanine	Amino Acid	Methionine, Cysteine, SAM and Taurine Metabolism	47089	LC/MS Pos Early	382	570	170.012	498-40-8	72886	65718	C00506	HMDB02757	87883	137314				1188891								737242	115029	169387	458887	162981	145462	808349	320846	745781	311933	1848139	384311	208540	479067	284076	342882	935161		1441059			270018	120790
3496	3-ureidoisobutyrate	Nucleotide	Pyrimidine Metabolism, Uracil containing	57549	LC/MS Pos Early	100001531	1207	147.076	2905-86-4	160663	141172	C05100	HMDB02031	96665	439085		64031		2664808			1106055		1009480	108483	1360983	759719	990429	623604	163453	529733	295217	4753972		600837		1138628	1135959	956315	238887	166632	380961	4201946	227848	1021909		142664	1268594	195442
3497	3-ureidopropionate	Nucleotide	Pyrimidine Metabolism, Uracil containing	3155	LC/MS Pos Early	1053	875	133.061	462-88-4	111	109	C02642	HMDB00026	3941123	696354	66645		602891	8358051	1026330		4107181	431629	3789637		460422	14099692	6216709	15520900	5316017	12317783	2338558	42756216	685014	7991497	2520120	28763934	14456828	11349374	9173702	423170	6807040	18704656	444689	29249370			2274056	28456742
2814	3b-hydroxy-5-cholenoic acid	Lipid	Secondary Bile Acid Metabolism	43507	LC/MS Neg	100004182	5205	373.275	5255-17-4	92997	83950		HMDB00308	1729023		55768	698427	368408	1874302	251360		399071	1355160	1601693	113273		799156	248700	2885747	2782022	1238430	1387516	1788668	810931	2427715	544725	3294562	3023328	2046512	1228941	4191101	960632	3020291	185873	1114066	93296	383536	933150	527256
4884	4-acetamidobenzoate	Xenobiotics	Chemical	57585	LC/MS Neg	100009413	1403	178.051	556-08-1	19266	18177	D03836							113489													137265	154283		302855		524226	209449	42092	164284		170552	321085
424	4-acetamidobutanoate	Amino Acid	Polyamine Metabolism	1558	LC/MS Pos Early	1113	1350	146.081	3025-96-5	18189	17180	C02946	HMDB03681	734125	2435578	993861	1909482	5608062	7622338	5800154		3354881	3440494	2297508	2479443	2032207	39094392	975894	1891546	5068395	3014600	2517220	4432352		9728553	609129	4258047		10917696	3331238	7410470		3941989	4745967		4859865	1151379	697556	469518
4338	4-acetamidophenol	Xenobiotics	Drug - Analgesics, Anesthetics	12032	LC/MS Neg	1383	2173.7	150.056	103-90-2	1983	1906	C06804	HMDB01859	109823											469384	321815		180156	368073		3036208			739324							366691
2586	4-cholesten-3-one	Lipid	Sterol	38125	LC/MS Pos Late	100002227	2520	385.346	601-57-0	91477	427	C00599	HMDB00921	24719160	12141525	14403375	4476961	12273564	1075968640	11321691	7767162	28407648	19506400	30761474	50145868	7785131	293536864	34343940	165884080	855195904	525172160	56195216	60698808	69354008	199932832	68742408	347749792	33241738	184094128	60081240	418306112	134785664	1377720320	157186768	56375888	4465300	28120784	55492448	35281264
429	4-guanidinobutanoate	Amino Acid	Guanidino and Acetamido Metabolism	15681	LC/MS Pos Early	100000096	2320	146.092	463-003;463-00-3	500	486	C01035	HMDB03464	4493607	5437968	1165501	766201	4464483	35058896	1711805	112063	3924398	3645380	8394095	1101555	4412376	130518664	6892337	20323984	13432462	21167568	7997078	24498360	3128373	21078364	8253342	38971004	10280576	8572037	10169200	3693912	13236883	19145296	3356774	7601540	706488	1969897	9263027	10529683
3710	4-hydroxybenzoate	Xenobiotics	Benzoate Metabolism	21133	LC/MS Neg	100000862	820	137.024	99-96-7	135	132	C00156	HMDB00500	213302					7935767			2923768		308792			5079546	278211	292034	109736	821705	86237	561294	332082	561187	175508	1979707	276429	4305294	836629			2306715	233126	736033				222702
4256	4-hydroxycinnamate	Xenobiotics	Food Component/Plant	36770	LC/MS Neg	100001675	1457	163.04	501-98-4	637542	553148	C00811	HMDB02035			44514		153592	2673975			990720		192375			982894	300228	88313	795452	330812	2335621	3294454	397238	270542		174547	620704	1272055	283265	179807		436920		790923		50387	201726	109694
3921	4-hydroxycyclohexylcarboxylic acid	Xenobiotics	Food Component/Plant	43516	LC/MS Pos Early	100004250	2005	127.075	17419-81-7	151138	133210	C04404	HMDB01988	1292426		440319	1267330	3061791	35085336			3227123	1332712	1688419			1076018	5512890	2310410	6591007	3689610	7549622	1966155	4457326	15570344	1944245		8942989	7330117	1594270	6388545	17066872	3609208	13781356	2166743		6157211	7534934	763920
47	4-hydroxyglutamate	Amino Acid	Glutamate Metabolism	40499	LC/MS Pos Early	100002544	1141	164.055	2485-33-8	439902	388936	C03079	HMDB01344	173189					1810689			206851					831402	100348		345563	249936		998584		923250		238622	198831	284618		297251	473637		185686	599563				285622
127	4-hydroxyphenylacetate	Amino Acid	Phenylalanine Metabolism	541	LC/MS Neg	144	1361	151.04	156-38-7	127	3881560	C00642	HMDB00020	157465	492562	265486	149854	257793	14821393	322750		7690111	941265	3570008			3331022	1457262	1434566	2157488	1558960	1220913	5499905	1490787	7502981	801632	5328270	5327235	944980	1045871	404489	1401243	24467258	1729925	2512713		328587	1717513	707895
142	4-hydroxyphenylpyruvate	Amino Acid	Tyrosine Metabolism	1669	LC/MS Neg	1141	1690	179.035	156-39-8	979	954	C01179	HMDB00707	3084640				95169	2197127			319654		525812			5176312	1011514	4818256		5717269	286490	5975925	1238716	1620818	2415773	1925098	1605569	1377238	5400641	174414	376007	266371	59692	2829875			1653102	1625832
85	4-imidazoleacetate	Amino Acid	Histidine Metabolism	32349	LC/MS Pos Early	100001207	2055	127.05	645-65-8	96215	86856	C02835	HMDB02024	2454447	616950	824340	256277	692090	21301218	572212	107084	8858965	1000388	2074508	235041	3576210	13646491	4055530	9849753	4267704	1607886	1265213	5557141	13839519	39566560	21547476	6023331	8039651	14679053	2925565	23295972	1162309	5384696	6915605	2695927	588649		1287060	4412072
261	4-methyl-2-oxopentanoate	Amino Acid	Leucine, Isoleucine and Valine Metabolism	22116	LC/MS Neg	100000551	2170	129.056	816-66-0	70	69	C00233	HMDB00695	14542919				803091	36695184	134189		3834932	814818	4690586			67897504	5711545	57029288	4643578	55818376	4553135	70986264	25325752	13116401	20628586	9532281	16649337	19131764	34576812	4814187	27385752	5142001	574400	28582600			12331041	12402488
3724	4-methylcatechol sulfate	Xenobiotics	Benzoate Metabolism	46146	LC/MS Neg	100004111	2665	203.002										118275	186353					42171			818492	53604		132182		33098			74192		114156		25131					324402	30556		41698
334	4-methylthio-2-oxobutanoate	Amino Acid	Methionine, Cysteine, SAM and Taurine Metabolism	40732	LC/MS Neg	100003712	1635	147.012	583-92-6	473	460	C01180	HMDB01553	149421					411078					41529			1181207	138096	1217736		970788	16476	375602	182731	392812	217502	56043	75325	156081	724465		136689	89925		360243			187250	146419
3495	4-ureidobutyrate	Nucleotide	Pyrimidine Metabolism, Uracil containing	22118	LC/MS Pos Early	100000718	1095	147.076	2609-10-01	1571307	1278628			3665233	2836433	525234	697519	3607012	13533939	1644629		2939583	2311838	5132306	418471	4372973	5381453	6703943	72061800	11003148	61172740	14614061	28404174	7327261	14863733	10150201	3094146	10111053	18983900	13835261	8547080	19698760	5076282	9178577	10910665	412836	1073737	3342759	10277778
3481	5,6-dihydrouridine	Nucleotide	Pyrimidine Metabolism, Uracil containing	61833	LC/MS Neg	100001425	1119	245.078	5627-05-04	94312	85115			739698	318869	49083		114369	4803763	142112		1380220	724097	70814			6544217	2240381	437609	4047340	1112115	2334820	986629	2918496	5111663	3098134	847331	1908219	3127311	487149	4390630	261642	3536207	1120918	1408784		223050	2485965	1838706
3659	5-(2-Hydroxyethyl)-4-methylthiazole	Cofactors and Vitamins	Thiamine Metabolism	27673	LC/MS Pos Early	100000098	2310	144.048	137-00-8	1136	1104	C04294		18709114	1818064	1042887	1344584	1826210	1939758	961202	594830	3148331	49784580	75336160	1758743	6084374	84599920	789354	2090907	2982678	622449	2540862	14877914	3750987	2094390	2633606	1427113	7935966	2309812	18580262	3425702	7229240	2030623	3423043	7827577	2090875	597733	1454174	14821791
3789	5-acetylamino-6-amino-3-methyluracil	Xenobiotics	Xanthine Metabolism	34424	LC/MS Polar	100001403	1710	197.068	1196153-01-1	88299	79659	C16366	HMDB04400	35262144	24032090	50997756	13336345	45630768	45133440	9808714		9929645	32167400	47645180	5020407	10999147	17012828	58302444	23103036	63741080	27322388	181534848	79774384	166069232	9596144	17885898	34602132	90509096	72920576	69121816	29484796	281623872	118677088	26597340	127521728	4388249	18802626	95349792	14349910
3790	5-acetylamino-6-formylamino-3-methyluracil	Xenobiotics	Xanthine Metabolism	34401	LC/MS Polar	100001402	1424	225.063	85438-96-6	108214	97287	C16365	HMDB11105			1863866		1371172	2015969	2711355		890295	313336	2453254		81153	992144	1231438		1158806		9580834					5112829		1703088	224099	792807		1489221	1466625			1268205	476302
4800	5-aminoimidazole-4-carboxamide	Xenobiotics	Chemical	39579	LC/MS Polar	100002772	1326	125.047	360-97-4	9679	9298	C04051	HMDB03192	208474	291786	102547		766539		329656		466387	750534	798271		295170	230571		850203		321190	814974	1125453		4882934			1465024	158951	273769					358809				311955
114	5-aminovalerate	Amino Acid	Lysine Metabolism	18319	LC/MS Pos Early	100000454	2220	118.086	660-88-8	138	135	C00431	HMDB03355	357128832	118040944	101195944	51311264	341792224	2492206592	203141712	10307947	63774084	56940648	696018560	24335388	168909840	217582144	230973776	128985792	784166144	27367628	241529280	204411424	31772316	246151600	77073776	2784352256	455200384	337828736	385784736	79257192	101488104	2938915072	56466352	208107632	19391150	37456344	117905112	98498992
1173	5-dodecenoate (12:1n7)	Lipid	Medium Chain Fatty Acid	33968	LC/MS Neg	100001232	5224	197.155	2430-94-6	5312378	4471803		HMDB00529						841489					3849313			365024	431766	4289855	6461542		2687738	452074		756506	73895	773810	3997119	3630102	105136	2357991	1822640	13225516	2450947	995395			3782149	295432
1546	5-hydroxyhexanoate	Lipid	Fatty Acid, Monohydroxy	31938	LC/MS Neg	100001148	1267	131.071	44843-89-2	170748	149280		HMDB00525	12578154	5156878	2402054	1329798	3647433	1231565	735047	76805	588435	3402553	5022427	133381	966420	5129797	7784310	10910785	17648932	18408788	21165078	30109308	873529	3339527	2827152	870393	16984680	914966	13775344	21880734	7367215	4169135	10841927	10536712	348560	3471987	19265742	2193780
234	5-hydroxyindoleacetate	Amino Acid	Tryptophan Metabolism	437	LC/MS Pos Early	71	1893	192.066	54-16-0	1826	1760	C05635	HMDB00763								133902	780986						569526						111817	1548713		255516	136740				107805	512641	601907	501766		256709
99	5-hydroxylysine	Amino Acid	Lysine Metabolism	15685	LC/MS Pos Early	100000054	2790	163.108	13204-98-3	1029	1002	C16741	HMDB00450	7627856	279430				10013887	4736201		1433714		941657			3980531	1334894	330974	2841888	1496185	1078935	2267346	1462558	6593362	4619387	15621984	1171596	6344785	1861518	1953122		856436	3161853	751294				421323
3926	5-hydroxymethylfurfural	Xenobiotics	Food Component/Plant	37429	LC/MS Pos Early	100002057	1542	127.039	67-47-0	237332	207215	C11101	HMDB34355	2351575	1913387	1244087	2335180	1329962	8244743	907556		4474503	2653119	2766991	715327	542865	3099564	1506603	3775005	5198675	4587314	2354757	3423105	7421267	2516511	688643	2021327	4039993	2892515	1877189	3090946	4823001	5859203	2486444	2483816	726705	817057	4689131	919805
419	5-methylthioadenosine (MTA)	Amino Acid	Polyamine Metabolism	1419	LC/MS Pos Early	212	2752	298.097	2457-80-9	439176	388321	C00170	HMDB01173	1198143			451067		9991122		388831	690894					6333818	8003788		2493248					11792485		37694448		2352566		106935		7727688	10285898
3483	5-methyluridine (ribothymidine)	Nucleotide	Pyrimidine Metabolism, Uracil containing	35136	LC/MS Neg	100001446	1778.1	257.078	1463-10-1	445408	393058		HMDB00884	371585	52050		24256		2503337			241577	35512		25610		2733091	2040975	952878	4117834	539689	1359814	1740683	2409122	3543871	1582917	311827	4381393	1028289	1068331	3340882	518338	2190966	183016	3236708			898536	4292548
441	5-oxoproline	Amino Acid	Glutathione Metabolism	1494	LC/MS Neg	1021	738.5	128.035	98-79-3	7405	7127	C01879	HMDB00267	27913808	16001189	2422374	2579789	8773591	17299780	4323473	1381110	16336356	7959865	30604512	1177077	4795080	21479540	4154948	50425480	32029196	9817214	8417821	133675176	9947998	17481596	13281463	4096217	40431332	23887118	48777548	8016681	25897668	12922557	5497075	68888856	1935922	2827987	7761929	63472412
2699	5alpha-androstan-3alpha,17alpha-diol disulfate	Lipid	Androgenic Steroids	37182	LC/MS Neg	100002007	4547	225.07											1169214															1102536									366115
2698	5alpha-androstan-3alpha,17alpha-diol monosulfate	Lipid	Androgenic Steroids	37183	LC/MS Neg	100002008	5208	371.19								103897	194767		415080								121838	30113			51203			568960	86578		236272		325799	165171		96288	48173	39349
2719	5alpha-androstan-3alpha,17beta-diol disulfate	Lipid	Androgenic Steroids	37184	LC/MS Neg	100002017	4275	225.07																										6033345									533657
2717	5alpha-androstan-3alpha,17beta-diol monosulfate (1)	Lipid	Androgenic Steroids	37186	LC/MS Neg	100002018	4925	371.19							22561		418437		531269															991844			32777						666722
2726	5alpha-androstan-3beta,17alpha-diol monosulfate (1)	Lipid	Androgenic Steroids	37188	LC/MS Neg	100002022	4806	371.19						41111		321406											46947	46417		201429	284853	71300	15897	148900	40808		136726		396585	279316		95058		68164				25517
2725	5alpha-androstan-3beta,17beta-diol disulfate	Lipid	Androgenic Steroids	37190	LC/MS Neg	100001987	3880	225.07	571-20-0	242332		C12525	HMDB00493						376393									594634						2988732			250920						552128
2723	5alpha-androstan-3beta,17beta-diol monosulfate (1)	Lipid	Androgenic Steroids	37191	LC/MS Neg	100002023	4635	371.19						120824										148830			139868		22089	146840	177177	90593	84903	131021		33612	39818	42090	1260399	358080	2485823	134246			988309			33748
2724	5alpha-androstan-3beta,17beta-diol monosulfate (2)	Lipid	Androgenic Steroids	37192	LC/MS Neg	100002024	4685	371.19												100013								110553						726488									332351
2643	5alpha-pregnan-3beta,20alpha-diol disulfate	Lipid	Progestin Steroids	37198	LC/MS Neg	100001988	3962	239.085											154423								240293							900474			77495		30161				1070132	109518
2636	5alpha-pregnan-3beta,20alpha-diol monosulfate (1)	Lipid	Progestin Steroids	37199	LC/MS Neg	100002013	4928	399.221						38064		367487		126298	83292		23189	78759		206034					65994	725713	25977	457270	123882	91123	202711	159364		23689	147675	1790202	122602	387298	54477	27433	145445	690801		120954	21068
2637	5alpha-pregnan-3beta,20alpha-diol monosulfate (2)	Lipid	Progestin Steroids	37200	LC/MS Neg	100002014	5060	399.221											112735								46249							355764									572092	45254
2634	5alpha-pregnan-3beta,20beta-diol monosulfate (1)	Lipid	Progestin Steroids	37196	LC/MS Neg	100002009	5180	399.221																										2287173									1700878
2644	5alpha-pregnan-diol disulfate	Lipid	Progestin Steroids	46172	LC/MS Neg	100002015	4310	239.085		5127902	4302261																							225517									350493
3568	6-hydroxynicotinate	Cofactors and Vitamins	Nicotinate and Nicotinamide Metabolism	27680	LC/MS Polar	100000809	2000	138.02	5006-66-6	72924	65756	C01020	HMDB02658	8495615	1089062			2574866	4545489	773626		1241510	1557343	7292976		752615	6421272	763496	1567649	1146452	2651379	835275	9174552	578623	2932246	58922520	11800833	4021733	28888338	2498398	1156039	2059352	5168806	1576245	2473699		1013356	1846352	1107179
2798	6-oxolithocholate	Lipid	Secondary Bile Acid Metabolism	46336	LC/MS Neg	100001068	5033	389.27	2393-61-5	164960	144621			1494918	125398	117525		341871		194261	128317	62840		155879			1155148	114668	1220613	7431159	663844	97000	650226	919919	743156	635110	149972	920763	2115295	183385	1061527	1528736	194917	214905	256905	118170	210605	156470	104350
111	6-oxopiperidine-2-carboxylate	Amino Acid	Lysine Metabolism	43231	LC/MS Neg	100004499	965	142.051	34622-39-4	3014237	2282737		HMDB61705	661216	170647				447446			814089	608929	315409			815689	183461	359096	868073	641533	287595	2067923	490175	478318	1091319	208050	1350938	323399	1167956	392687	664251	309702	207240	661624			662650	2484041
2796	7,12-diketolithocholate	Lipid	Secondary Bile Acid Metabolism	31906	LC/MS Neg	100001070	4215	403.249	517-33-9	3080560	2338317								5208374					36022				49894												311950	79308		3809178		77256
2606	7-hydroxycholesterol (alpha or beta)	Lipid	Sterol	47890	LC/MS Pos Late	100005999	1930	367.336		107722			HMDB06119						520511					175093			439704	423976	226205		592229		310064	827731	519817	669265	674592		170715	202152	177070	286792	1200816	358259	217120	108306
2812	7-ketodeoxycholate	Lipid	Secondary Bile Acid Metabolism	31904	LC/MS Neg	100001063	4821	405.265	911-40-0	188292	163659		HMDB00391			159610	637102	206844	119084408					3036565			1030980	690184		759082	454316	582261		506706	831723	88480	3074643		377321	1575574	1222499	223166	191112496	828542	461658	28544
2799	7-ketolithocholate	Lipid	Secondary Bile Acid Metabolism	43830	LC/MS Neg	100001069	5082	389.27	4651-67-6	444262	392247		HMDB00467	632376	491769	77921			218434448	10126910	7622664	22737012	84882896	1590613	534972	122864	7119726	1732046	2019860		592493	1558255	879565		1548948	285345	35204172		1983090				230931344	4370487	1349991		13112349
3447	7-methylguanine	Nucleotide	Purine Metabolism, Guanine containing	35114	LC/MS Neg	100001456	1729.7	164.058	578-76-7	11361	10883	C02242	HMDB00897	203635	44796				5854684		22416	3162853	115530	69560			9108025	346157	519553	669362	463005	361339	1162532	3271747	4397023	3356848	1990547	524028	5575766	639265	543151	263198	3740572	70205	915297		28514	363260	728525
3781	7-methylurate	Xenobiotics	Xanthine Metabolism	39598	LC/MS Pos Early	100002241	1321	183.051	612-37-3	69160	62375	C16355	HMDB11107				1489634		8432029			141635	2488565				770648	1566243				150799		917742	417780				2037290				3652799		233048
3788	7-methylxanthine	Xenobiotics	Xanthine Metabolism	34390	LC/MS Pos Early	100001396	1350	167.056	552-62-5	68374	61660	C16353	HMDB01991	152220					3712846				599615	365679			687264	1009985									397965						4545829
3457	8-hydroxyguanine	Nucleotide	Purine Metabolism, Guanine containing	38672	LC/MS Pos Early	100002744	951	168.052	5614-64-2	65154	58661	C20155	HMDB02032	188229	1445361		121535	249801	1093743	505085	81277	1995165	85590	926992		608930	1715166	440111		707574	375519	119954		169288	1161173	221540	2926764		282749	108588	436332	468246	4855359		50381		97939	99923
1551	8-hydroxyoctanoate	Lipid	Fatty Acid, Monohydroxy	21239	LC/MS Neg	100000956	2300	159.103	764-89-6	69820	63018		HMDB61914	223759	150211				525310			263317	340901	197970			726501	208334	212220	418620	323273	234847		195019	693561		773070	275232	150612	278298	253732		212199	254858	234592			269403	275961
1579	9,10-DiHOME	Lipid	Fatty Acid, Dihydroxy	38399	LC/MS Neg	179	5180	313.238	263399-34-4	9966640	8142232	C14828	HMDB04704	4171253	2025229	1906616	2271020	317858	5703344	1053718	453811	2823851	4422147	1099965	407855		14748308	1629994	1461587	18431236	412178	2226659	3051436	2339692	8186885	1976954	7704180	7751906	5830567	3729513	6722766	172343	12921995	1308917	4037305	725213	6994281	3847846	1057621
4123	acesulfame	Xenobiotics	Food Component/Plant	48569	LC/MS Neg	100006203	1581	161.987	55589-62-3	36573	33607		HMDB33585	42204	24332		1628566					575984		575098		54613		10636333		3455696	243642		35820					2000023	276109	4567791		531181			833708
415	acisoga	Amino Acid	Polyamine Metabolism	43258	LC/MS Pos Early	100004541	1813	185.128	106692-36-8	129397	114601			391988				517359	6996664			318106	492326				3429250	1163186		3818107	2139397	2793867	1528769	912516	3507005	878627	1493895	1461957	1417769	854854	2536651	596186	2780811		915961			1269224	683067
1124	aconitate [cis or trans]	Energy	TCA Cycle	46173	LC/MS Polar	100001359	4260	173.009						3149397	1403748	250075	282904	3039436	9329681	1484104		3773878	2302481	2571032		713086	9279729	822328	2043054	1370495	6702123	515609	4767529	1158980	402582	3596413	463459	3176258	285852	1643990	404939	469184	438079	1812200	3111628	982973	545405	808470	885697
3412	adenine	Nucleotide	Purine Metabolism, Adenine containing	554	LC/MS Pos Early	880	2221	136.062	73-24-5	190	185	C00147	HMDB00034	28002064	19634120	44576428	19608258	10970045	17615584	17569134	3765160	13041749	17324844	86692008	7677526	25160994	53109608	15290187	60090136	278897152	89290216	170336160	69002112	20336324	77955104	10218767	105057880	65133112	49826968	36878804	7932367	24960624	29722056	101469768	10360893	3263627	6730962	16201481	83105208
3411	adenosine	Nucleotide	Purine Metabolism, Adenine containing	555	LC/MS Pos Early	798	2169	268.104	58-61-7	60961	54923	C00212	HMDB00050	24601256	2583213	12157896	6231280	973295	5538226	3867815	757822	435272	1077933	3513970	4110411	9940680	5250784	8916493	8623108	121322912	10381507	67016304	3669521	4726215	14900429	2707443	35879488	31882540	4691241	6046468	4616971	4717399	17047188	2627366	6642343	842328	2131784	2121403	68241584
3405	adenosine 3'-monophosphate (3'-AMP)	Nucleotide	Purine Metabolism, Adenine containing	35142	LC/MS Neg	100001449	1245	346.056	84-21-9	41211	10463793	C01367	HMDB03540			82129	49517	127562		51105			31949	102518	150622					889089	23539	126742						168631									69185		3130627
3408	adenosine-2',3'-cyclic monophosphate	Nucleotide	Purine Metabolism, Adenine containing	37467	LC/MS Neg	72	1793	328.045	37063-35-7	2024	1947	C02353	HMDB11616			14929								281683	61275	143817				1843151	72181	1076100			595064			227540					48926	649905					3736260
1313	adipate (C6-DC)	Lipid	Fatty Acid, Dicarboxylate	21134	LC/MS Polar	100000863	3000	145.051	124-04-9	196	191	C06104	HMDB00448	36851752	2473371	2062884	1950922	10334498	6313547	6874062	439358	12391213	10865100	17433696	485411	3140056	73062592	10323348	12630801	46763896	30854168	24214076	75328032	55781432	12935793	35049896	6529167	44783724	19321968	27376684	44459640	33414020	6803349	15899819	29332754	1071218	5927398	20927088	12000534
1233	adrenate (22:4n6)	Lipid	Polyunsaturated Fatty Acid (n3 and n6)	32980	LC/MS Neg	100001193	5678	331.264	2091-25-0	5497181	4445971	C16527	HMDB02226	46848072	33120504		4499913		21829338			4912763	4356928	3052827		6813918	18582146	17570408		18761460		16142394	16770461	18985728	21371116	19240858	28853240	15712768	19869668	35491956	36977412	24689146	22914892	51386672	6360560				14404136
407	agmatine	Amino Acid	Polyamine Metabolism	15496	LC/MS Pos Early	100000103	3057	131.129	2482-00-0	199	194	C00179	HMDB01432	1735819	759615	592126	342722	1679388	899351	1946969	387000	911109	2539940	716937	540203	650726	10227369	525051	406860	1205723	510871	473271	5463964	1371003	642081	1863278	966721	1077223	371134	292811	573918	645667	825184	1142631	555044	551422	1417339	583315	291040
28	alanine	Amino Acid	Alanine and Aspartate Metabolism	1126	LC/MS Pos Early	811	1700	90.055	56-41-7	5950	5735	C00041	HMDB00161	637077888	256121664	49004280	35655948	228262704	1003663808	103533016	9485117	267504560	133383336	653771456	15546882	94788584	1228587392	696934016	1051360640	832529472	645625280	431176256	1908540416	773097152	1442291584	928201088	533273824	960208256	898743680	1628236672	411482176	912013632	1100267392	193122560	1035272384	15177534	69575328	530121856	1022602304
843	alanyl-glutamyl-meso-diaminopimelate	Peptide	Polypeptide	53165	LC/MS Neg	100008987	635	389.168		826	803			37346	96901			32633	5042991			361757	155867	255326			17158762	282082		869727		725354	680020	182880	206449	258275		424814	449253	207789	150577			154294	361931				346284
482	alanylleucine	Peptide	Dipeptide	37093	LC/MS Pos Early	100001890	3055	203.139	1638-60-4	259583	227831		HMDB28691	50855608	21464200	8289200	5937600	42933336	6836707	58938536	2590346	74944184	83473760	145498512	2809957	8143405	4944028	2359402	1606842	3151552	1646806	1399835	2438799	2561216	8863838	4164759	53952080	2539412	2952116	3552678	2445413	2971259	15503846	70550448	1048285	4385665	18092756	2227250	930138
3398	allantoin	Nucleotide	Purine Metabolism, (Hypo)Xanthine/Inosine containing	1107	LC/MS Polar	1002	1672	157.037	97-59-6	204	199	C02350	HMDB00462	852482	5359485	143319	432171	663477		506850		3683816	2835133	1653224		701043	488846		1288452		1369447		2912460	224806	251503	1207022			833896	1971333		1312288			6669396		125871	1460489	148532
18	allo-threonine	Amino Acid	Glycine, Serine and Threonine Metabolism	15142	LC/MS Polar	100000272	2511.1	118.051	28954-12-3	99289	89699	C05519	HMDB04041	587465	1080156							155785		365985			2134840		3864368		459582		9776333		2850169	1409576	1616784	692986	1184961	5802069		4917264			1256122				983987
264	alpha-hydroxyisocaproate	Amino Acid	Leucine, Isoleucine and Valine Metabolism	22132	LC/MS Neg	100000706	1840	131.071	10303-64-7	83697	75520	C03264	HMDB00746	4815017	2615836	208369	107200	1297055	2558413	558103		4777948	1056507	11096018		279822	38221740	1171381	6702410	1464158	1562492	988629	39119968	1255426	1726289	3528897	17576268	10013456	3320446	143457600	436046	5199279	29913576	334392	7083961		150643	576081	6278326
297	alpha-hydroxyisovalerate	Amino Acid	Leucine, Isoleucine and Valine Metabolism	46537	LC/MS Polar	100001300	1052	117.056	600-37-3	99823	90190		HMDB00407	15679709	8909596	288073	247396	3810967	17333092	1327108	407052	13216697	2304947	28737816		1093811	225739264	5701227	37334968	7313963	7675355	9969874	249200512	5362735	14498053	13377539	60242980	80981232	14287438	485105536	2860838	31641354	123744968	2356556	36923468		624890	2889678	35085016
4502	alpha-hydroxymetoprolol	Xenobiotics	Drug - Cardiovascular	54738	LC/MS Pos Early	100006385	2900	284.186	56392-16-6	114962	102899		HMDB60994																			3978699
344	alpha-ketobutyrate	Amino Acid	Methionine, Cysteine, SAM and Taurine Metabolism	4968	LC/MS Polar	796	940	101.024	600-18-0	58	2829426	C00109	HMDB00005	712016													6799993		1715820		2659904		2737312						869719	1987445					462459
43	alpha-ketoglutaramate*	Amino Acid	Glutamate Metabolism	62101	LC/MS Polar	100002397	1916	144.03	18465-19-5					1989423	2541619			2169717	20987628	465548	139437	3124691	1700891	4291897		674553	15958961	1808037	27785494	1939608	44988880	1010396	14222934	15093046	2607381	17947514	995398	6437199	2077489	9842525	3258899	49538680	4087141	1276468	3459589	190386	319101	3966631	1422491
1128	alpha-ketoglutarate	Energy	TCA Cycle	528	LC/MS Polar	93	2700	145.014	305-72-6;328-50-7;22202-68-2	51	50	C00026	HMDB00208	27587186	12063416	1248640	1536874	13981393	39459536	6769515	569717	25083356	12194180	47131800	702637	5065090	83523416	13208855	171432704	5844458	127564448	5503900	109892408	16655673	32683852	20387036	7213000	42120096	20726542	97107976	8361249	22050300	6245539	10131293	83510664	1907730	2463315	22918884	42211444
3599	alpha-tocopherol	Cofactors and Vitamins	Tocopherol Metabolism	1561	LC/MS Pos Late	1105	2522	430.378	59-02-9;10191-41-0	14985	14265	C02477	HMDB01893	478882048	221164384	127510264	436919104	142432064	478046304	206140064	17416540	421808480	265697568	201616608	19787320	222874080	461134784	35777904	719127232	565728896	239755616	179326080	282575552	305730112	770104832	157868128	333780192	154079552	358545312	504608768	543643840	518011616	202227504	156261392	334759648	122720160	236910768	430924128	202143856
3600	alpha-tocopherol acetate	Cofactors and Vitamins	Tocopherol Metabolism	38288	LC/MS Pos Late	100002328	2702	490.425	7695-31-2	2117	2033	C13202	HMDB34227				7551842			3417516															6940479					410180		17402544			830733	163813
3605	alpha-tocotrienol	Cofactors and Vitamins	Tocopherol Metabolism	37502	LC/MS Pos Late	100001979	1986	424.334	58864-81-6	5282347	4445512	C14153	HMDB06327	5369650	8194157	1452012	3441899	11719901	23587760	1157807	392737	22259468	12978982	8730161		6772668	4697076	1035951	18969512	12580530	17379582	11857591	16158993	9976924	35958504	1418895	4828926	17802308	33467618	24392882	7069479	19660448	15686610	4344717	10970562	550164	1506049	15244857	4675099
2732	andro steroid monosulfate C19H28O6S (1)*	Lipid	Androgenic Steroids	32827	LC/MS Neg	100002152	3871	383.153				C04555	HMDB02759																31539					214914									282943
2707	androstenediol (3alpha, 17alpha) monosulfate (2)	Lipid	Androgenic Steroids	37207	LC/MS Neg	100002026	4712	369.174						87717					97495								215019		26748			10566		166197	609237		196058		107972	2065757		203324	127738	69566
2703	androstenediol (3beta,17beta) disulfate (1)	Lipid	Androgenic Steroids	37202	LC/MS Neg	100001992	3740	224.062		87120982		C04295	HMDB03818						4605504								1287737	3697264						17326512		491577	2238095		363820				5152099	656090
2704	androstenediol (3beta,17beta) disulfate (2)	Lipid	Androgenic Steroids	37203	LC/MS Neg	100001994	4065	224.062		87120982		C04295	HMDB03818						4383292								2706648	2272750						12997115		549756	2119549		2177299	49852			6842449	1426054
2700	androstenediol (3beta,17beta) monosulfate (1)	Lipid	Androgenic Steroids	37211	LC/MS Neg	100002028	4535	369.174	521-17-5	13847309			HMDB03818						713486									1644419						11730619		251887	2137385		79033				6183519	122435
2701	androstenediol (3beta,17beta) monosulfate (2)	Lipid	Androgenic Steroids	37210	LC/MS Neg	100002029	4500	369.174											47621								394397	31003						107540	121138					594278	5903955	155673	70243
2694	androsterone sulfate	Lipid	Androgenic Steroids	31591	LC/MS Neg	100001073	5022	369.174	2479-86-9	159663	19988780		HMDB02759				102714		807840				66612					76020						1463153		40022	298478						698524	70012
80	anserine	Amino Acid	Histidine Metabolism	15747	LC/MS Pos Early	100000044	2924	241.13	10030-52-1	112072	100482	C01262	HMDB00194	35477976	1293171	88894		422907	9085108	2772611	567680	5264094	499709	1259039		2244271	6427725	3396816	4800148	6109714	3231817	1074374	1854744	3044208	7044334	2349339	34655816	3196316	8259861	11115830	4013574	9163951	2244734	7984561	3635488		367845	1120350	371790
3879	apigenin	Xenobiotics	Food Component/Plant	21189	LC/MS Neg	100000935	3845	269.046	520-36-5	5280443	4444100	C01477	HMDB02124						62966								584594	8515970		39504	93278	110860			47969					47012			152153						84088
971	arabinose	Carbohydrate	Pentose Metabolism	575	LC/MS Polar	828	1804.5	195.051	28697-53-2	66308	59687	C00216	HMDB00646	3775913	7988500	730588	1294197		106085776	5312541		9383856		6131957		435047	170858000	24821752	11727634	8036529	30673824	31209068	16862968	40054424	29007072	5825041	7003847	10022604	29268568	32821028	1284247	32371216	13438348	6515375	29622696		1662410	4661238	12759894
986	arabitol/xylitol	Carbohydrate	Pentose Metabolism	48885	LC/MS Polar	100006430	1932.4	151.061		6912		C01904		465522	737933			283759	1001529	221047		803294		987387			1332589	238210	286566	658887	369994		2182548		4124665	210958		1087133		583277	307804	200824	2237713	638571	13184649			1047536	259938
988	arabonate/xylonate	Carbohydrate	Pentose Metabolism	48255	LC/MS Polar	100006115	2700	165.04						3774574	4121382	1171752	830457	2840625	32699930	1887222		6560610	1544088	4535630		3164370	48887448	6110353	43704356	7665308	364254592	4892214	208655104	4982353	15715372	8969069	37104320	17108260	13284493	29939084	5656701	7893621	20927576	2428294	28068756		410634	1929877	4983999
1199	arachidate (20:0)	Lipid	Long Chain Fatty Acid	1118	LC/MS Neg	893	6240	311.296	506-30-9	10467	10035	C06425	HMDB02212	193526400	464177216	593792896	655074304	224445984	162011872	157950144	30626448	333022368	602293376	928421312	29230080	689949888	219373792	86710792	1897910912	37448016	500896576	84515424	1151256704	28845930	151141264	297082240	252131856	153671088	70162304	581703360	68708568	70973768	43841592	144957344	392982016	192099088	424260864	214181040	346873856
1232	arachidonate (20:4n6)	Lipid	Polyunsaturated Fatty Acid (n3 and n6)	1110	LC/MS Neg	229	5535	303.233	506-32-1	444899	392692	C00219	HMDB01043	9056734	7242541	101222	5945511	4400084	137751424	4033074	6258150	113805496	7988705	31513624	1536093	1550956	76929144	19518244	32514138	20447288	7652974	20155438	18523468	20934704	13366628	8743100	70041032	4553421	23845816	10865794	8724999	9273995	63233784	15673903	15164959	3081417	2648131	5042761	22569940
1692	arachidoyl ethanolamide (20:0)*	Lipid	Endocannabinoid	57532	LC/MS Pos Late	100015853	1941	356.352		3787294	3015157			1082402	606886	581820	650802	419723	6341125			3058266	565284	722042		314645	927260	387983	558451	820271	2137856	814925	852354	965855	2210499	2226322	1793512	732447	1078486	1486071	1199100	2773894	1473991	526476	843907	470321	831131	445391	739554
1471	arachidoylcarnitine (C20)*	Lipid	Fatty Acid Metabolism(Acyl Carnitine)	57513	LC/MS Pos Late	100015833	1512	456.405			28639199		HMDB06460	56058972					26576580			1557918		1203771			44846208	1834738	13591907		11295849	5398118	28125510	11701797	16235423	7541589	7517214	13898505	6790199	17779560	22116448	6352080		1925420	922509			5779773	3939771
396	argininate*	Amino Acid	Urea cycle; Arginine and Proline Metabolism	57461	LC/MS Pos Early	100002769	2150	176.103	157-07-3	160437	140984		HMDB03148	5956710	4588402		292135	1918778	5132485			4153145	6131118	4850667		906815	5371520	3347355	842699	2694067	6963464	2281962	2963761	2209573	6229482	1811568	9182533	4780468	4081816	3285304	4120846	1896511	6581793	2248925	4303971		825674	2307579	2356366
365	arginine	Amino Acid	Urea cycle; Arginine and Proline Metabolism	1638	LC/MS Pos Early	231	2825	175.119	1119-34-2	232	227	C00062	HMDB00517	29527796	60952808	12167284	9911323	120011368	214917408	26440774	4070073	58013744	102249864	54053552	3779109	17768992	141161904	695170560	36734960	79890784	96261792	146356176	114999632	111501936	654920896	113635936	1045121856	85008184	57025192	16849380	44315980	90518376	1392654080	52271520	239164976	6384851	26405790	137496448	146386880
38	asparagine	Amino Acid	Alanine and Aspartate Metabolism	512	LC/MS Pos Early	917	1225	133.061	70-47-3	6267	6031	C00152	HMDB00168	80340136	20682712	6502799	19442968	20056292	53968708	23174788	2863737	24439588	30115940	90270408	2346322	6406404	13092492	85661608	6744764	7529048	14136507	5252099	24313828	57961952	87673296	156186720	64130652	7296582	5128193	86186688	6396763	16549553	227740720	48679436	18564856	2835779	10086841	27928620	1579252
34	aspartate	Amino Acid	Alanine and Aspartate Metabolism	443	LC/MS Pos Early	234	1165	134.045	56-84-8	5960	5745	C00049	HMDB00191	837105792	541239872	65785944	67443096	278544288	1190927744	236958720	28106372	466717792	327290432	1080688768	20169888	154708208	716277952	521418688	381435808	643711104	283442240	263880032	959077824	475416320	541908800	696144320	209871216	1040544064	326662496	927775616	128048432	381571680	124257536	566761536	360832160	14448835	69454560	282838496	404126432
4505	atenolol	Xenobiotics	Drug - Cardiovascular	38658	LC/MS Pos Early	100002726	2668	267.17	29122-68-7	2249	2162	D00235	HMDB01924																					588178432
1326	azelate (C9-DC)	Lipid	Fatty Acid, Dicarboxylate	18362	LC/MS Polar	2029	2520	187.098	123-99-9	2266	2179	C08261	HMDB00784	34776216	23586046	12092235	7510795	75529528	12943242	17457736	2338474	15929768	116473152	87740224	2415714	25294564	43619480	10668182	190364064	67559064	231464912	27807576	97003368	29920288	54162432	23509124	18445052	91910656	15408696	42050740	23657636	81962848	13805379	44099352	57125212	6438579	15488557	117056744	123781288
1693	behenoyl ethanolamide (22:0)*	Lipid	Endocannabinoid	57534	LC/MS Pos Late	100015854	2164	384.384		3023585	2289737			481989	209858		121947		2735074	104572		1204141					349490			278610	940431	148429	508384	412892	1413496	785683	487099	102088	291952	707095	438730	4047212	696820	142432	432724
2505	behenoyl sphingomyelin (d18:1/22:0)*	Lipid	Sphingomyelins	48492	LC/MS Pos Late	100006294	3083	787.669			24846873		HMDB12103						1005500								5873580	340325		620189	291980	394606	981705		367191		2820490			417700		671725							434426
1474	behenoylcarnitine (C22)*	Lipid	Fatty Acid Metabolism(Acyl Carnitine)	57514	LC/MS Pos Late	100015832	1561	484.436			28639204			23495538					6522016			1898675		714677			18476882	593874	3678197	1713386	4487024	1883616	11007288	4389450	3836983	3810730	2093521	4474502	1737131	4974235	6724343	2351001		698183	450320			1624488	1817219
3700	benzoate	Xenobiotics	Benzoate Metabolism	15778	LC/MS Neg	100000008	1750	121.029	65-85-0	243	238	C00180	HMDB01870	585836	3577994	2646280		10911902	12133229	577213	3770102	7581894	6672249	5729099	757819		6578975	10765145	10586098	25707656	19060014	12067295	1769834	5580373	6493630	1904270	3169446	2027096	6365153	1183200	16305120	19920968	23590944	1681456	2740407	3365391	584129	3971408	10618790
3498	beta-alanine	Nucleotide	Pyrimidine Metabolism, Uracil containing	55	LC/MS Pos Early	244	1905	90.055	56-41-7;107-95-9	239	234	C00099	HMDB00056	16254483	1926342				15921082	1014858		6618828		11752611			25776972	19117338	11795518	18574260	9833245	8260055	20496044	7995940	59088152	9527832	45868104	17324426	13748376	19206268	5702044	9804986	36298300	3028835	10001009		908631	8243701	11743178
3670	beta-cryptoxanthin	Cofactors and Vitamins	Vitamin A Metabolism	57591	LC/MS Pos Late	100001977	2560	552.433	472-70-8	6384256	4904571		HMDB33844	38159996		337714	489018	8825220	10757093	206920		8868774	10205535	36514264		349234	138457024		6694447	9032703	29908364	3312509	7422599	5513825	45668376	1511257	1410287		10998591	33617720	22865344	7426345	947211	2794274	1617856	1039025	3081463	8372567	10883398
3947	beta-guanidinopropanoate	Xenobiotics	Food Component/Plant	35101	LC/MS Pos Early	100001411	2145	132.077	353-09-3	67701	61020	C03065	HMDB13222	4989519	692634			1189236	2145685			1295994	451069				2161218	1760099	5531820	4750309		535687	2594276	2737043	6062677	2539861	804945		3900066	4409536	4408984		339482	139856	936149
276	beta-hydroxyisovalerate	Amino Acid	Leucine, Isoleucine and Valine Metabolism	12129	LC/MS Polar	1442	1149.8	117.056	625-08-1	69362	62571		HMDB00754	1416280	1305507	468575	726255	2150591	8181706	1131544	604826	4032174	2326977	1209961	647653	981954	29035998	3697850	3765585	10722881	8292778	4831868	25473654	3100952	9021875	6538213	10352970	7824766	5716513	36318268	5530546	8785133	15136744	2347480	2576674	366286	567060	2906051	4026958
2587	beta-sitosterol	Lipid	Sterol	27414	LC/MS Pos Late	100001033	3054	397.383	83-46-5	222284	192962	C01753	HMDB00852	4309092	4522880	3436299	4837468	6280057	219331104	3268095	4574041	17218796	8506346	21021536	4637808	4875460	145712544	27250434	14766683	102800640	75419776	31583812	34745580	18258586	137164640	17816264	95060592	3683494	44464992	18822092	92781528	40994100	144311744	28769648	18249142	1586300	7877891	22925260	14737710
6	betaine	Amino Acid	Glycine, Serine and Threonine Metabolism	3141	LC/MS Pos Early	799	1064	118.086	107-43-7	247	24219951173	C00719	HMDB00043	2026935	8748892	2797081	1600922	5123150	22772510	4579151	2282897	6284716	4603765	23940876	1634245	2150199	98821080	18481048	48760180		67988824	35638856	39867884	7625202	8236089	1841043	6390462	3803141		29945718	2708505	38223464	20474870	1881084	1040170432	2744176	1647053	8820199	7860443
3645	bilirubin (E,E)*	Cofactors and Vitamins	Hemoglobin and Porphyrin Metabolism	32586	LC/MS Pos Late	100001950	1045	585.271	114-25-0	5315454	4474753			324789	114747	233895	1573007	130158	2997577	126805		347389	1245702	715832	475263	255146	1057389	1175045	154792	2010339	442895	1222555	500390	1659864	616944	296514	3636017	500909	1256004		1091613	1732429	2939192	775475	330193		154203	324933	328822
3644	bilirubin (Z,Z)	Cofactors and Vitamins	Hemoglobin and Porphyrin Metabolism	43807	LC/MS Pos Late	1090	1840	585.271	635-65-4	5280352	4444055	C00486	HMDB00054	627768	2157466	2200506	19032208	920539	33470260	1478303		4688116	2775872	2441683	2199407	2174504	15729264	15282366	849866	9001828	1420967	8061276	4887665	11154610	20486372	926634	115276040	5553144	33248876	1360730	19910512	49722240	26614428	4848641	1445421	172925	1856774	1538622	1799636
3647	biliverdin	Cofactors and Vitamins	Hemoglobin and Porphyrin Metabolism	2137	LC/MS Pos Late	250	1016	583.255	55482-27-4;55482-27-4	5353439	10628548	C00500	HMDB01008	3136065	2477247	981036	3526864	879215	14059280	246815		3964424	2704617	3339590	818178	457896	9573942	1711836	1393609	4594222	3748878	4221323	2772061	3760391	3078726	2592589	10561036	4534386	1499697	404507	4076863	5021673	10229082	3575540	3171126	102691	774530	2861503	1324240
3624	biocytin	Cofactors and Vitamins	Biotin Metabolism	42971	LC/MS Pos Early	100004272	2625	373.19	576-19-2	7098660;83814	75634			549885					656328					219755				316692	656987		488921		1376726	141243	681579	415739		559210		854749		359195	317414		500280			343583	670727
3623	biotin	Cofactors and Vitamins	Biotin Metabolism	568	LC/MS Pos Early	251	2253	245.095	58-85-5	171548	149962	C00120	HMDB00030	2138437	886554	691768	573764	1802422	214938	694718	106963	175406	1956094	1439593		1078554	216711	260147	2065612	2116840	2684078	362862	1485739	3047316	524085	1850634		1999463	375967	2308642	1430947	3439081		1220475	677122	276355	1331749	1350129	532709
1403	butyrylglycine	Lipid	Fatty Acid Metabolism (also BCAA Metabolism)	31850	LC/MS Neg	100001151	1470	144.067	20208-73-5	88412	79766		HMDB00808	961580						182172				785099				218453	364664	588339	238364	185939	3601562	143069	1184030	534287	699394	1144779	438331	2255676	136958	768385	3674032		1247461			502044	948797
112	cadaverine	Amino Acid	Lysine Metabolism	15308	LC/MS Pos Early	100000110	3036	103.123	462-94-2;1476-39-7	273	13866593	C01672	HMDB02322	3160495	490747168	26635000	29650992	2006659	117777856	30624970	6668184	68441016	2135912	55847408	723962	2660415	277134944	47798460	4837650	220048288	441187	21713736	2490797	1930691	7551397	6797146	178225376	45686116	108514208	22473614	149369808	1226784	128917960	7268189	8355778		702898	1435724	19111282
3776	caffeine	Xenobiotics	Xanthine Metabolism	569	LC/MS Pos Early	849	2106	195.088	58-08-2	2519	2424	C07481	HMDB01847	2378078			663715	2338162	39811260	329937			4292485	588330			1287292	6483137	1576475	2646224	707906	8506844	780137	19541506	1890286	2610979	787654	1315791	8406427	7942579	1128305	6355625	11634899	2114655	11620286	457066	760261	7880892	1231510
2589	campesterol	Lipid	Sterol	33997	LC/MS Pos Late	100001269	2873	383.367	474-62-4	173183	151215	C01789	HMDB02869	4416618	1684631	1274923	1061767	3248721	99460376	1190923	2101801	19570818	8745522	7620157	1877596	1810519	57447956	10509385	40705872	41212424	22447144	14734283	8206648	16772005	39628784	6207256	39209136	1978331	14999684	8748302	56318756	19408324	66711624	10029878	3170962		3469574	5976592	4763170
1169	caprate (10:0)	Lipid	Medium Chain Fatty Acid	1642	LC/MS Neg	888	5090.7	171.139	334-48-5	2969	2863	C01571	HMDB00511	6544079	1780361		1763229	30869740	13925753	2152915	4119782	3096029	1735489	39573248	2016165	1873985	10325503	10252789	30554614	49662536	16172844	22932190	26808170	7325617	15164565	17046492	8856718	10683617	57244844	17224594	38318028	108624008	367698848	50693424	20227576	21174854	17317790	374511904	11492247
1165	caproate (6:0)	Lipid	Medium Chain Fatty Acid	32489	LC/MS Neg	926	2713.7	115.076	142-62-1	8892	8552	C01585	HMDB00535	5298726	3547636	13683342	7088608	3554886	40587300	2152264	1373500	2412911	18855816	14099693	3239237	2836995	160112672	132250864	44253160	126249104	53144292	268760896	108212432	8473980	45808040	11882163	130799632	64858996	26822244	153152992	137221600	90547264	143137328	12308581	104214472	2354952	13116483	45001792	23461880
1167	caprylate (8:0)	Lipid	Medium Chain Fatty Acid	32492	LC/MS Neg	932	4362	143.108	124-07-2	379	370	C06423	HMDB00482	5662956		12181467	1976145	11009332	10501167	2362423	4164413	5706088	664750	5775921	2166620	2172977	9972284	9901315	17880122	25526282	20524488	250863040	234907952	8759899	13520808	7190687	8417407	21019934	20363038	20333460	20768416	24218632	211901296	16987928	14175638	4899517	14682410	52089012	9206886
55	carboxyethyl-GABA	Amino Acid	Glutamate Metabolism	40007	LC/MS Pos Early	100003260	2085	176.092	4386-03-02	2572	2474		HMDB02201	69001016	15019472	6207507	8178618	27607360	62766656	18796568	1393977	8921730	36692424	10924026	2354688	2941885	81601824	24520814	57890852	60335056	117288936	53998616	59613328	37424268	81554408	59263928	14627698	64215088	66503980	59559136	76037768	13772905	29847366	49628120	66503696	915223	19193684	48554996	29362000
4359	carboxyibuprofen	Xenobiotics	Drug - Analgesics, Anesthetics	43333	LC/MS Pos Late	100004171	810	254.139	15935-54-3	10444113	8619532		HMDB60564		160779		609146					510789					125706			1622486				311091										71971			39737224
1496	carnitine	Lipid	Carnitine Metabolism	15500	LC/MS Pos Early	100000007	1978	162.112	461-05-2	10917	10455	C00318	HMDB00062	27768300	15740596	11384996	5328171	4162404	84418320	5514077	6502186	26174880	8386905	18328388	4727184	18731628	43580168	14071682	11455418	20776744	19459282	11625066	12321304	27284148	91225872	23303356	121428008	18481088	30770134	9518791	88447312	47417436	83021984	39069792	16819002	3811070	5011118	42039260	8721822
77	carnosine	Amino Acid	Histidine Metabolism	1768	LC/MS Pos Early	249	2942	227.114	305-84-0	439224	388363	C00386	HMDB00033						3994279								10074898	5467508	869268		877543	1531397	1106302	4927974	1263010	6070159	65102792	1037701	12007169	569147	13183144	106513	3391008					588233
3666	carotene diol (1)	Cofactors and Vitamins	Vitamin A Metabolism	57635	LC/MS Pos Late	100015966	1720	568.428						177942800	20318616	18900386	64415544	96625552	180075008	11407718	7569594	219752976	102478768	185037808	3692080	19366904	204300208	11059653	114014712	116627512	150742176	77178776	176251904	168325120	214861712	71226224	81947904	101305264	120589560	230227536	238769104	123758976	108207528	106231784	127644024	69686576	67018708	161724064	135935168
3667	carotene diol (2)	Cofactors and Vitamins	Vitamin A Metabolism	57636	LC/MS Pos Late	100015967	1904	568.428						43687832	1326863	1244322	8974064	8277414	38106908	1485644	406383	32706126	8297887	22471430		4533945	136158272	827605	14477152	25095330	10063414	6803273	17963966	18550704	36663200	3856762	5998350	7955831	20345828	55054020	33389684	8016134	9004366	5524904	14898011	3352913	3864803	18158842	9198000
3668	carotene diol (3)	Cofactors and Vitamins	Vitamin A Metabolism	57637	LC/MS Pos Late	100015968	1948	568.428						22651146	619974	612780		6697697		941514		15250472	5925003	16158169		867100	45069956	216872	5008803	5806649	3598847	3202980	5436087	8256378	12477254	2228161	2767874		8223231	22605388	15206229	5818560		3690141		2137232	3030000	9581192	7565517
3718	catechol sulfate	Xenobiotics	Benzoate Metabolism	35320	LC/MS Neg	100001605	1906	188.986	4918-96-1	3083879	2341024		HMDB59724					29861	3015530								1254196					53605			310791		226643						242897	32366
2455	ceramide (d16:1/24:1, d18:1/22:1)*	Lipid	Ceramides	57437	LC/MS Pos Late	100015727	3850	620.598											9408586			169924					1815447			1322755	1294310	227156		860416	3203591				1465082	854060	1280563		6300328	4445322			255217
2451	ceramide (d18:1/14:0, d16:1/16:0)*	Lipid	Ceramides	57432	LC/MS Pos Late	100015735	2477	510.488						1040663	1627957	560351	759110		13450006			1167576	375123	1250810	468533	306713	5169405	1178913	1827564	5031819	4587110	3234140	1696264	2632796	4942901	2099928	2300772	524652	8125565	1757447	2860055	2646182	13209247	5678263	1759566		229165	3434689	643745
2452	ceramide (d18:1/17:0, d17:1/18:0)*	Lipid	Ceramides	57434	LC/MS Pos Late	100015737	3055	552.535						892924	145091	78773	178848		9181298				152116	497148	824012		8006931	469440		1322406	3139862	1832450	782454	1718129	2333085	1468448	3417965		1423095	769942	1856410	917575	2505948	1880349				989737	269144
2454	ceramide (d18:1/20:0, d16:1/22:0, d20:1/18:0)*	Lipid	Ceramides	57440	LC/MS Pos Late	100015755	3920	594.582								320792			13387795			1010473			927526		5352884	2489723		2372765	5264875	842430	475928	1942981	9652274	3058781	6898027		3168802	3203833	4246891	216041	16324070	7545854	1127994		608969	1282806	244703
2456	ceramide (d18:2/24:1, d18:1/24:2)*	Lipid	Ceramides	57443	LC/MS Pos Late	100015744	3858	646.613											7473383								3761805	796332		875356	965827	705538		1562480	2076811	478849	5654806		295268	1317570	771163	167688	3497344	1243668
1488	cerotoylcarnitine (C26)*	Lipid	Fatty Acid Metabolism(Acyl Carnitine)	57516	LC/MS Pos Late	100015835	1649	540.499			35015992		HMDB06347	938816					1362311								1392784		584223	641757		539901	734473	563738	1173613	310459	587772	141888	385088	830779	1172963	671067	672693	218409	230692			969887	391513
4659	cetirizine	Xenobiotics	Drug - Respiratory	54745	LC/MS Pos Late	100009034	1052	389.163	83881-51-0	2678	2577	C07778	HMDB05032																												32442320
2758	chenodeoxycholate	Lipid	Primary Bile Acid Metabolism	1563	LC/MS Neg	1123	5264	391.285	474-24-9;474-25-9	10133		C02528	HMDB00518			2516636			1871421824	2266437				18596666			27536248	8558462			2677539						369738016						152162288	78440016	18157104	571752			3937712
3960	chlorogenate	Xenobiotics	Food Component/Plant	34120	LC/MS Neg	100001349	1732	353.088	6001-76-9	5315832	4475041			58193			20691	129460	1212923				36751	182343	33177			243185	142544	245945	210753	192756	106271	197869	76880	101907	188235	241347	222964	82455	304878	144496	1239341	157625	162808	72969	53401	363863	189504
2755	cholate	Lipid	Primary Bile Acid Metabolism	22842	LC/MS Neg	136	5165	407.28	81-25-4	221493		C00695	HMDB00619		1643022	3379422	728409	554385	1036740544	563852	271485	3899124		29234440	392602		7097137	25072104		8302789	2474800	3651236		3249736	10487969	175390	27680296	1421693	8062536	5824488	3584966		176808928	32424312	6683037	781075	1345048	911579	561171
2562	cholesterol	Lipid	Sterol	63	LC/MS Pos Late	266	2707	369.352	57-88-5	11025495	4937803	C00187	HMDB00067	17038416	20907448	158044032	13001756	10058810	581174272	63727840	14549163	33911052	18571166	71389688	29830826	81269376	374818656	80063120	108483008	228237984	210277888	99112248	64290456	296749536	272141056	82418016	652539968	17398820	106336032	64441868	267359040	238160256	794379008	117361096	56564012	126088144	8969437	48007040	28828990
1736	choline	Lipid	Phospholipid Metabolism	15506	LC/MS Pos Early	1256	1961	104.107	67-48-1	305	149278	C00114	HMDB00097	51644068	27969140	8199820	8758427	14184814	272302144	17575756	2027713	19894816	12161041	59740524	3438287	13428248	349966400	127846144	216598576	169403088	230640912	191220096	170206880	111385872	135545312	28626208	134577856	121519104	121422920	72727592	36215904	92935024	223014800	41880012	240712000	1826591	9144335	52959112	156377088
1737	choline phosphate	Lipid	Phospholipid Metabolism	34396	LC/MS Pos Early	267	700	184.073	72556-74-2	1014	119298	C00588	HMDB01565	511675	277316	1137509	1433685	486564	2691137	443720	680482	513714	289438	464728	772767	352335	1061502	2197140	8766331	869784	2070087	1550059	1368304	2567119	1013508	754389	35012800	2419533	2004086	2258155	529586	318838	4293082	1175326	827510	588288	3924727	3055900	930114
3968	cinnamate	Xenobiotics	Food Component/Plant	12115	LC/MS Neg	1259	2878	147.045	140-10-3	444539	392447	C00423	HMDB00930	31748				67177	123347					56843			733077	158444	52956	116496	117752	58695	247886	82186	270135	109985		58019	1026864	454336		78768			140815			72267	85332
73	cis-urocanate	Amino Acid	Histidine Metabolism	40410	LC/MS Neg	100003425	1200	137.036	7699-35-6	1549103	1266070		HMDB34174	3374902	2219319	472141	230483	1242824	2106276	726570	190307	6877095	3402126	5848389	323058	541772	1436145	3285819	1137951	2184559	1224885	681230	333345	1384051	4080530	586373	324350	497280	3412388	2983041	671881	794150	259687	1946572	3007965	226656	690363	1597395	2516378
1122	citrate	Energy	TCA Cycle	1564	LC/MS Pos Early	1124	915	210.061	77-92-9	311	305	C00158	HMDB00094	419309	2497921	581376	6714855	2642104	21504034	1248433	623266	4090905	901743	656426		701661	9782542	3534889	2512204	1441627	5436984	895496	5535126	3733486	1301139	2836033	647328	2573730	956499	3013057	825245	966144	1263836	1160991	8074569		1215670	1641145	4257712
373	citrulline	Amino Acid	Urea cycle; Arginine and Proline Metabolism	2132	LC/MS Pos Early	391	1520	176.103	372-75-8	9750	810	C00327	HMDB00904	1106573056	786498688	270369984	250442160	762441216	1510491264	677617408	75980504	986501120	733806272	1767989248	58898556	369667072	1070618048	892549120	953655680	1104771840	685544512	801622848	563931840	1362521728	2328073216	1599762816	651478336	841467456	754093824	1151784448	817481088	1249979776	624031552	1133286528	713089920	101383376	357256224	814023360	838126784
2580	coprostanol	Lipid	Sterol	45986	LC/MS Pos Late	100005346	2850	371.367	360-68-9	221122	19951861		HMDB00577	177531824	23731396	15164706	19694736	18051282	95639432	7017107	2233947	145125760	113489112	48242988	4324643	15508591	39345280	2635670	335037024	176398656	68725984	29752492	52849924		80421544	52963124	18983956	17472850	74065088	86869296	208432816	111056480	67886768	14349474	50653888	8672391	9866299	50478476	19178056
3795	cotinine	Xenobiotics	Tobacco Metabolite	553	LC/MS Pos Early	848	2213	177.102	486-56-6	854019	746405		HMDB01046	1572600		528113	837807								339901		3163427	2923980		2666529		2004937					178456		2694641		1659585	4242400	8651609	119657
401	creatine	Amino Acid	Creatine Metabolism	27718	LC/MS Pos Early	1221	1947	132.077	57-00-1	586	566	C00300	HMDB00064	5838355	2482030	1286636	1840797	1195432	2445548	1113070	1987730	1199163	386146	1367066	237560	1992337	6718105	7943014	4480759	1273717	7458800	4707648	4084674	3831183	6784593	2229643	38449000	2416656	2951569	3593047	2470604	2864854	11760138	5021800	4495060		1474287	23893448	4905291
402	creatinine	Amino Acid	Creatine Metabolism	513	LC/MS Pos Early	275	2055	114.066	60-27-5	588	568	C00791	HMDB00562	4312320	2175376	1881086	1049820	54758904	1938213	9315420	891057	6459356	1227193	6463467	843222	2119238	2518225	8714007	2285617	1780768	4052484	1389263	4020873	1238039	1572094	1793265	351998368	1698646	1024470	3416078	1721520	699182	83808584	2619335	1855562	941655	631682	52694336	2321932
345	cysteine	Amino Acid	Methionine, Cysteine, SAM and Taurine Metabolism	1868	LC/MS Pos Early	800	1488	122.027	52-90-4;56-89-3	5862	5653	C00097	HMDB00574	6521399	1156990	308225	289666	1416062	8651776	739767	122467	4434464	1300824	5811206		362232	13440763	1393565	2550252	4844121	3439049	2563814	6330871	4803790	6355160	5754251	5752986	5013291	4023963	3436034	3542844	1877521	2348269	3367672	1269008		635058	1741422	2260688
350	cysteine s-sulfate	Amino Acid	Methionine, Cysteine, SAM and Taurine Metabolism	22176	LC/MS Polar	100000808	2273	199.969	1637-71-4	115015	102939	C05824	HMDB00731	7573024	2190737		337857	516540	5301337	634996		1059419	288929	2947992		729862	4884357	5821459	6751953	3999344	4597860	1823694	13575813	3305966	29010464	3017302	1060661	6919964	8010568	17671572	2729253	4339651	1939153	2822340	7162592			2459917	3955588
356	cysteine sulfinic acid	Amino Acid	Methionine, Cysteine, SAM and Taurine Metabolism	37443	LC/MS Pos Early	100002113	597	154.017	207121-48-0	109	107	C00606	HMDB00996	540227					971543				348124	64586			726850	297173	249284	285511	409360	181745	490258	253860	566523	552453	311521	294059	263568	329563	298870	265610	218859		306607			206823	188360
438	cysteinylglycine	Amino Acid	Glutathione Metabolism	35637	LC/MS Pos Early	278	2132	179.048	19246-18-5	439498	58762	C01419	HMDB00078	1556914	177090	206027		382422	2724537	477583		2183416	224420	1332279		58741	9592196			1259235			547924	375315		936418	3180783	492083	1404426		623748		876133	510013
351	cystine	Amino Acid	Methionine, Cysteine, SAM and Taurine Metabolism	56	LC/MS Pos Early	279	2000	241.031	56-89-3	67678	575	C00491	HMDB00192	1508710	509611				1132843			664891		936847			741309	1973081	335320	468078	616985	195708	1489989	788731	4095574	3035895	292466	923498	1726640	1604857		182656	877667	133871	864492			314529	1052119
3508	cytidine	Nucleotide	Pyrimidine Metabolism, Cytidine containing	514	LC/MS Pos Early	827	2124	244.093	65-46-3	6175	5940	C00475	HMDB00089	11961450	4258077	6166457	1304570	4759889	70677232	1060225	409711	17482138	11584728	27669684	1325873	1463040	265263696	133971400	22929096	124984888	33979204	37478872	16816590	12399532	62734296	48685072	86758784	46820588	39957944	35946124	21894880	11780746	121127312	28977186	50850464		5473857	19260452	72978080
3507	cytidine 2',3'-cyclic monophosphate	Nucleotide	Pyrimidine Metabolism, Cytidine containing	37465	LC/MS Neg	73	937	304.034	15718-51-1	417654	369711	C02354	HMDB11691	669160					547819					315509			770255	704613	39261	1139234		690467		59371	957385	96418	483852	77423	69029	70081	164601	69485	1491778	399952	146374				2206022
3509	cytosine	Nucleotide	Pyrimidine Metabolism, Cytidine containing	573	LC/MS Pos Early	881	2060	112.051	71-30-7	597	577	C00380	HMDB00630	1409002	1157156	1403105	414128	960745	4763249	1420759	329698	10248232	2213963	8189220	469565	858832	139460432	53938784	1355729	23524628	2219855	7022523	7705169	1174255	12321899	4947993	3404900	2292542	6853580	16458290	3746513	2210970	9124874	3867310	5555515	138570	1945321	2251571	8121501
3649	D-urobilin	Cofactors and Vitamins	Hemoglobin and Porphyrin Metabolism	40084	LC/MS Pos Late	100002569	935	589.302	3947-38-4	6276321		C05795	HMDB04161	3846361	8729698	2777376	2913717	1296556	247067744	1061303	324704	77567256	4527510	4056802	794138	1270479	36531896	77765792	8197621	23231552	6942919	7292984	13080267	128592352	10654636	7038106	78931600	16815984	124734776	3673706	18546838	26998916	44697480	11203323	3863140	172355	1910164	2727030	19826330
3986	daidzein	Xenobiotics	Food Component/Plant	32453	LC/MS Neg	100001219	3566	253.051	486-66-8	5281708	4445025	C10208	HMDB03312	251805					73867									914108	268529	27631	611633	27820			24137	311433		112612	58257	50288	25793	3698407	99836		690415		141737	99836
2682	dehydroisoandrosterone sulfate (DHEA-S)	Lipid	Androgenic Steroids	32425	LC/MS Neg	100000792	4745	367.158	651-48-9	12594	12074	C04555	HMDB01032			13671			18946298					80429			255454	4942719			27569	61403		12137851	27858	228400	12164092		1057655		54237	28326	11837643	1785846
2795	dehydrolithocholate	Lipid	Secondary Bile Acid Metabolism	31891	LC/MS Neg	100001067	5360	373.275	1553-56-6	159623	140347		HMDB00502	22521702	51419324	7449175	15184950	61294768	108984408	8454661	5399126	38382168	87843696	126553224	3496507	137282592	193830528	10055661	265904512	220932416	191698816	39986368	121351000	61577368	115263232	73522432	4808069	120479456	48807252	57808800	108682648	121623768	21692808	8337467	41959572	9881920	7916987	40346964	13280826
3603	delta-tocopherol	Cofactors and Vitamins	Tocopherol Metabolism	33418	LC/MS Pos Late	100001216	2259	402.349	119-13-1	92094	83144	C14151	HMDB02902	11641115	2175002	2717324	3728018	2580397	10181130	1759551	964731	6054518	32346686	6169279	183687	1655798	4839436	755402	8575624	12624604	17269594	1973305	9437576	7211054	36337020	1856271	3452383	6136302	3024450	21606168	5553672	37306960	6646533	8584490	9324465	5522402	2584293	5453164	3506300
1495	deoxycarnitine	Lipid	Carnitine Metabolism	36747	LC/MS Pos Early	100001662	2052	146.118	6249-56-5	134	705	C01181	HMDB01161	59928636	77974064	22086544	16468726	99683112	3633403904	72169944	2688297	33330164	11811733	376522560	12506921	74223992	1561174912	271608608	75531264	235427856	247646512	811113664	221423616	631719744	2346287104	111316528	4104620544	487993984	1232863616	41224668	409396736	245863440	2449040640	172492720	240535328	15526937	32516462	71737360	167679600
2775	deoxycholate	Lipid	Secondary Bile Acid Metabolism	1114	LC/MS Neg	302	5294	391.285	83-44-3	222528	389318	C04483	HMDB00626	2026563072	463967616	155364384	350531040	313560096	1884583296	247455072	219632512	510448768	1620102400	1086458112	61539332	298549504	851553024	88755392	225027968	4276326656	71964664	850367488	568607424	489106880	844267520	280696448	2890203904	1179929088	3592080384	2406665216	3487355648	2390903808	1629593728	1648792192	439261184	90569944	175308528	646449344	216213792
2776	deoxycholic acid sulfate	Lipid	Secondary Bile Acid Metabolism	52969	LC/MS Neg	100006638	4880	235.117																1456118		118257	296412							224424512			171815	42682		133226		103551	3666983	1120974
3990	deoxymugineic acid	Xenobiotics	Food Component/Plant	57394	LC/MS Pos Early	100001816	1036	305.134	74235-24-8		32816053				408809	135781		101346	60826720	1226738		534778	1271108	544664		159652	3423956	1278487	1169164		1687401	1133947	6324145	808210	14983032	1292552	43884448	1226354	586054	828566	89484280	285352	3507228	1293763	1507789			1626158	462895
4809	dexpanthenol	Xenobiotics	Chemical	38314	LC/MS Pos Early	100002376	1740	206.139	16485-10-2	4678	4516	D03726	HMDB04231		447272	446503		357062		488835		509860		553029			70211			320887	643711			341907			165644	3521219	161112	512392	347695	355360		3225351	359456	176195	167795	258318
412	diacetylspermidine*	Amino Acid	Polyamine Metabolism	62105	LC/MS Pos Early	100020242	2510	230.186			25944163								31807596	2707018		32772974	2100319	2153277			264789840	100189216	3446230	12079986	856765	74464576	19515236	5100156	374456992	8348211	277389952	4659774	205824496	13780925	28984916	3321528	340239136	15531121	102296304		605131	5336280	31448810
2330	diacylglycerol (12:0/18:1, 14:0/16:1, 16:0/14:1) [2]*	Lipid	Diacylglycerol	55001	LC/MS Pos Late	100010959	2716	556.494																																			21716260	4216187
2333	diacylglycerol (16:1/18:2 [2], 16:0/18:3 [1])*	Lipid	Diacylglycerol	54966	LC/MS Pos Late	100010940	2733	608.525											266460			675570					611349			721673	354388	224040					447309						6442315	626847	920900
3869	diaminopimelate	Xenobiotics	Food Component/Plant	15130	LC/MS Pos Early	100000115	2569	191.103	1476-39-7;2577-62-0	439283	1267353	C00666	HMDB01370	12006922		58596	152861	128284	2723219	315764		1296457	497432	2799283			20506916	1727073	3523287	14262835	3713788	17776016	14075921	1239345	5506168	3558588	2522209	11839787	7973137	4105671	930893	1409716	14079715		17590802			939551	17595896
4725	diethanolamine	Xenobiotics	Chemical	20691	LC/MS Pos Early	100000837	1960	106.086	111-42-2	8113	13835604	C06772	HMDB04437	5023908	1215200	1376083	970377	12407300	1588568	1991234	1548202	2183539	1236163	4264085	1671552	815894	1300875	851513	2126570	8194077	1988363	1428300	3155814	1481429	4767907	3263921	763365	2440728	6607231	5205320	11777313	1393246	1035000	1898152	1454380	790295	1499291	966009	2066797
4739	diglycerol	Xenobiotics	Chemical	40700	LC/MS Pos Early	100003700	818	167.091	627-82-7	42953	39150			1810577		330282			3269333		1232538						5550448	13874470	3804354	1624692	1824111	3111794	5110136	9709368	15859906	10519866	6619378	5537741	13909510	26086248	2408564	2285247	10563585	797955	2122714		244808	5740782	1115402
1236	dihomo-linoleate (20:2n6)	Lipid	Polyunsaturated Fatty Acid (n3 and n6)	17805	LC/MS Neg	1231	5730	307.264	2091-39-6	6439848	4944228	C16525	HMDB05060	98954312	205273472	12053471	33201360	3032335	34119416	3531563	3657166	24337256	42968448	21866060	6691236	25383032	39204200	11256983	75161416	31154734	14098507	23655296	26067462	8416329	29498176	14907575	14619574	8623484	33425534	62311132	34182992	24713008	17457504	27182208	22810700	13520390	9241781	26272300	28861010
1231	dihomo-linolenate (20:3n3 or n6)	Lipid	Polyunsaturated Fatty Acid (n3 and n6)	35718	LC/MS Neg	100001739	5596	305.249	17046-59-2	5280581	4471954	C03242	HMDB02925	15426888	24653010		3844770	6571961	72346360	293519	5894439	25596080	13292120	46931204	941347	1999682	28743166	13196229	6817028	11338406		11512386	3232672	33756424	11860461	3447310	20616332	1313765	18197238	6616149	11766409	7339568	46924036	19623656	4209346	5198401	6896175	1652048	7825913
3993	dihydroferulic acid	Xenobiotics	Food Component/Plant	40481	LC/MS Neg	100003432	1928	195.066	1135-23-5	14340	13701			539214	460006	613618	541646	319435	5051187	584314		2942552	446445	326746	41738		1969457	585090	4581316	782180	460221	761616	381681	1424658	1334812	583998	1734021	720151	2472388	746312	409562	557296	5315729	1368957	644914		630842	421723	374075
3465	dihydroorotate	Nucleotide	Pyrimidine Metabolism, Orotate containing	601	LC/MS Polar	923	1910	157.025	155-54-4	648	628	C00337	HMDB03349	38000820	11882159	1027004	1229441	4844084	31470508	2091350		20683772	6891321	32261982		2301608		13331643	36100704	68360320	6905401	2240196	130556376	20133744	15573841	16274978		392983296	50493472	280430528	2088786	6986497	1491511	965143	29813286		360041	10162718	95512656
379	dimethylarginine (SDMA + ADMA)	Amino Acid	Urea cycle; Arginine and Proline Metabolism	36808	LC/MS Pos Early	100001810	2850	203.15	102783-24-4	123831	110375	C03626	HMDB01539	16549245	2685186		252913	6351938	102916512	2370096		4691072	1200923	13448457		2138980	115274784	18881048	5507319	11586980	2979246	7045278	7417127	3645903	25714696	10435186	42092572	5495178	42044128	6633045	12759712	833173	26625116	7070635	6797715		463047	5593561	7091852
5	dimethylglycine	Amino Acid	Glycine, Serine and Threonine Metabolism	5086	LC/MS Pos Early	806	1104	104.071	1118-68-9	673	653	C01026	HMDB00092	2591035	882255	278872		905377	3181206			4845738	819586	1725142			2557145	1301632	8137459	4474730	2080696	1549911	12839947	2708836	4294415	1489221	1738807	15116388	1689824	2852321	4020188	3707024	3183202	1562897	3581576		1014145	2030671	1306780
1235	docosadienoate (22:2n6)	Lipid	Polyunsaturated Fatty Acid (n3 and n6)	32415	LC/MS Neg	100001182	6034	335.296	7370-49-2	5282807	4445934	C16533	HMDB61714	73593504	264106720	8994234	21840458	6520015	2586225	2631204	1093404	3398624	82331352	35693948	1725079	80869072	5616662	930286	156874512	14917927	24416764	23555310	46720352	581830	15220333	27156190	3189925	9423480	5580793	168770496	13011011	10025471	816321	8933555	29223082	9291103	10799707	8558127	19169552
1222	docosahexaenoate (DHA; 22:6n3)	Lipid	Polyunsaturated Fatty Acid (n3 and n6)	44675	LC/MS Neg	100000665	5525	327.233	6217-54-5	445580	393183	C06429	HMDB02183	25626264	2236181	65808		1057863	174633984	876941	2601524	44988900	1223360	5696007		1695934	12654272	2709275	9889178	5956764	1527299	9408296	4632775	2523255	3592769	1105255	29459180	2115705	6179971	7893105	1841948	1209310	38244524	13626624	2712877	622439	2061086	1472245	3716254
1221	docosapentaenoate (n3 DPA; 22:5n3)	Lipid	Polyunsaturated Fatty Acid (n3 and n6)	32504	LC/MS Neg	100001181	5571	329.249	2234-74-4	6441454		C16513	HMDB06528	10813219	2874709				24595592	179000	1201180		1792044	3059184			10831830	1870698	3378085	5043686	931816	3592307	1767872	6405527	3203626	1265833	6513381	1292967	3895172	3417983	2459947	916487	10296259	6302209	1220759			1032887	2314057
1234	docosapentaenoate (n6 DPA; 22:5n6)	Lipid	Polyunsaturated Fatty Acid (n3 and n6)	37478	LC/MS Neg	100001580	5624.5	329.249	25182-74-5	6441454	4945614	C16513	HMDB01976			339894	718281	769011	69556352	660613	714741	10680095				616267		1350264						826577			4320597					581070	4219218	4009494
1332	dodecanedioate (C12-DC)	Lipid	Fatty Acid, Dicarboxylate	32388	LC/MS Neg	100001102	2990	229.145	693-23-2	12736	12213	C02678	HMDB00623	267621	206087	200893		14712065	1072304		138361	309274	36351	8995261			551544	327406	4240961	1425422	13253744	2255599	477056	520561	2498364	570578	629465	899104	919516	348852	354479	1545399	966051	930238	840813	590586	311959	1396003	6347081
1335	dodecenedioate (C12:1-DC)*	Lipid	Fatty Acid, Dicarboxylate	61864	LC/MS Neg	100019972	2700	227.129										332767	444601					273570			354195	232304		308293	235054	69303		83522	448016	252119	216860	85493	125119	24567	238742	359979	1139450	141329			122366	74134	143922
4813	ectoine	Xenobiotics	Chemical	35651	LC/MS Pos Early	100001635	1980	143.082	96702-03-3	126041	112069	C06231		695471			149551		855107		127420							207004	503762	892886	410326	225512	763279	876367	807521	559841	137336	4658752	422327	1541183		2055675	184452	1406657	648664		224993	1009036
2541	eicosanoylsphingosine (d20:1)*	Lipid	Sphingosines	57597	LC/MS Pos Late	100015870	1443	328.321						4107096					4581511								6746495	680244	844065	8942617	8478207	1986122	1291694	1927277	8411777	4013871	5492218	1653553	10764021	2359209	9596166	5004288	5017277	2588407	2002696			3718817	418923
1220	eicosapentaenoate (EPA; 20:5n3)	Lipid	Polyunsaturated Fatty Acid (n3 and n6)	18467	LC/MS Neg	2050	5450	301.217	10-2005-9;10417-94-4	446284	393682	C06428	HMDB01999	4009869	9753936			1184494	39159288	1184848	1096358	15838369	5031678	3508985			9750272	2984858	5990119	4019461	194449	6604610	1667787	2755734	4514418	2008840	13126735	1894227	8974653	3167229	2591659	1997340	21381852	7606983	2904542	1113725	1878219		4209808
1368	eicosenamide (20:1)*	Lipid	Fatty Acid, Amide	62445	LC/MS Pos Late	100020764	1800	310.31		5365374	4517402			13068514	18283106	23445144	23082598	16647033	19635094	15384790	15584821	19649090	15297092	13517230	13377731	16849190	12469957	11973851	14728672	13929519	19241828	14029626	15232471	12171153	18764596	12438107	12832035	11995332	13357595	13161342	15673775	17129876	15812933	14944928	17056056	34695224	21796630	18866998	14215100
1202	eicosenoate (20:1)	Lipid	Long Chain Fatty Acid	33587	LC/MS Neg	100001335	5950	309.28		5282768	4445895	C16526	HMDB02231	190742016	527881632	623109632	248170656	47223952	156878912	62333532	17130216	346546400	384331040	359243744	19733468	196631904	197174048	82346736	674980928	152837072	215120752	80719096	500002176	35885048	226604752	104101296	234898288	119013112	127131824	355326048	123254200	127798208	132957968	152191936	426221888	88447864	125283016	192678384	288040352
1478	eicosenoylcarnitine (C20:1)*	Lipid	Fatty Acid Metabolism(Acyl Carnitine)	57519	LC/MS Pos Late	100015838	1484	454.389						6280122					10876638								10593817		2412708	8087453	1296229	1127448		2055495	3396743	533033	3088574	4388497	3185507	3139100	8552814	1086176	2339046		702845			2088794
4526	enalapril	Xenobiotics	Drug - Cardiovascular	52949	LC/MS Pos Late	100008948	900	377.207	75847-73-3	3222	3109																31604566					349921792		45724528		20456340
4534	enalaprilat*	Xenobiotics	Drug - Cardiovascular	62482	LC/MS Pos Early	100020800	3149	349.176		5462501	4575429	C11720	HMDB41886														23138084					93152984		42518952		15739691
4173	enterodiol	Xenobiotics	Food Component/Plant	39630	LC/MS Neg	100003072	4327	301.145	80226-00-2	123725	110294			802116		39893											1881549	3873685				493074		550893	189279	1476546	608050		1587109	160069			1071037				496468
3997	enterolactone	Xenobiotics	Food Component/Plant	39626	LC/MS Neg	100003070	4515	297.113	78473-71-9	10685477	8860823			14381582	12085723	4736068	3213783	8904534	4352610	4411966	942313	5147124	7193736	14079879	4313091	8578436	29748668	2037743	5574051	12067996	19024716	28487828	32096416	22172792	31436644	5566723	3443204	28895888	667874	8948065	3819340	3050019	2269118	2695781	2928485	4044037	47159216	23788904	7416585
2593	ergosterol	Lipid	Sterol	27553	LC/MS Pos Late	100001020	2420	379.336	57-87-4	444679	392539	C01694	HMDB00878	642116				133921	2524087	232165		533924	519921	857082		263690	2633892	2037639	446440	1440432	58832976	1095914	561733	407819	2189694		237459		3424390	782553	1590698	1567573	2439980	214012	1105888			3417575	152981
1207	erucate (22:1n9)	Lipid	Long Chain Fatty Acid	1552	LC/MS Neg	1087	6355.6	337.311	112-86-7	5281116	7924	C08316	HMDB02068	57687900	189750688	40050520	72370120	5572316	78720008	9529066	2694495	39928944	166759344	88706376	4117287	76121808	21707052	5403526	195989344	9591728	17249544	26206436	73033920	9739735	20068442	23676368	242092352	84567400	15665649	38347492	7837217	6881740	7346855	38075468	216371360	14836870	11375288	17634772	31730268
1695	erucoyl ethanolamide (22:1)*	Lipid	Endocannabinoid	57533	LC/MS Pos Late	100015860	1939	382.368		6436482	4941114			331288					6173943			481317									93908				290534	794955	389531	1118142	567810	674024		227612	196827	749804	120184
1479	erucoylcarnitine (C22:1)*	Lipid	Fatty Acid Metabolism(Acyl Carnitine)	57525	LC/MS Pos Late	100015841	1535	482.42						25716986								486174					20529486	685315	7490689		3680863	2498194		6124298		2450986	5059218	9130681		5012409	12004928	2180874	5597908	2004519				874755
4004	erythritol	Xenobiotics	Food Component/Plant	20699	LC/MS Polar	100000846	1491	167.056	149-32-6	222285	13835932	C00503	HMDB02994														386974																487771		151226
1115	erythronate*	Carbohydrate	Aminosugar Metabolism	42420	LC/MS Polar	100001320	2186	135.03	88759-55-1	2781043	2061231		HMDB00613	13184070	9732762	3415024	2217635	14186345	197687760	6040536	972803	43177244	8510230	19718940	1529123	3471992	192739648	43929936	57658348	367862464	96776264	49128200	115764360	39243432	104689064	49592668	24419626	38324104	141604864	36187968	78425936	63439648	56447524	9676410	47817692	2217215	3885895	25974944	72229696
3849	erythrose	Xenobiotics	Food Component/Plant	27722	LC/MS Neg	100001042	780	119.035	583-50-6	94176	84990	C01796	HMDB02649	875486	290952	587100	359620		6145977	251875	176515			3156815			6837853	1110703	1754149	2395550	4063954	4703490	613330	3467731	2833515	651794	1137349	1910177	6290536		586921	3450913	2036446		14550623		382767	2008290	3948143
307	ethylmalonate	Amino Acid	Leucine, Isoleucine and Valine Metabolism	15765	LC/MS Polar	2054	2785	131.035	601-75-2	11756	11263		HMDB00622	27977658	3981396	1331504	979407	8948383	24983434	2321159		8755563	5953033	1940015	440381		46835872	4963111	18279864	15019940	7258427	6781852	45954380	7068419	16060252	23819916	3875705	23431272	4213784	17247064	4766995	101977200	7060375	3938175	13147725		2729392	3702728	3413323
4006	ferulate	Xenobiotics	Food Component/Plant	35630	LC/MS Neg	100001542	1755	193.051	537-98-4	445858	393368	C01494	HMDB00954	104120			53143	94346	18797432	108830		1634024	63542	179161			9094636	5458908	598414	398057	3414858	4209098	586086	8940357	2028128	280744	1457354	887394	4761942	687775	255721	645521	1414871	510725	514426		147474	447399	281632
3578	flavin adenine dinucleotide (FAD)	Cofactors and Vitamins	Riboflavin Metabolism	2134	LC/MS Neg	327	2425	784.15	146-14-5;84366-81-4	643975	559059	C00016	HMDB01248						329437			52998		31373			732797	23263	394833	311339	213555	269243	487974	94159	397837	38586	63355			96633	187288	81532		51269	130367			194654	61118
3579	flavin mononucleotide (FMN)	Cofactors and Vitamins	Riboflavin Metabolism	15797	LC/MS Neg	100000251	2390	455.097	130-40-5	710	690	C00061	HMDB01520	71398				27595	50070			40292					128433		160465		78946	30400	396057	102264	51072	165374		846894	55528	153052				34364	168812		40330	70133	112474
75	formiminoglutamate	Amino Acid	Histidine Metabolism	43493	LC/MS Pos Early	100002500	1880	175.071	816-90-0	439233	388370	C00439	HMDB00854	10076589	47269512	3139226	3351101	28161938	56621644	7554595		13236629	17871070	44630644	726762	13729616	70080552	5295060	409731648	31941080	109923032	11959287	1018986752	40013812	71953392	265005328	1314958	131877080	99311600	191572768	28273996	66897984	2651545	5874229	80725008	2369127	5878011	41936472	234524336
1039	fructose	Carbohydrate	Fructose, Mannose and Galactose Metabolism	48195	LC/MS Polar	878	2065	225.062	57-48-7	5984	5764	C00095	HMDB00660	854441	1786357	459099	99173	1125580	18644534	828222	170829	3371757	1042944	4620302			31141324	16637883	499767	5400672	4735193	4963099	4632962	13060260	31854664	3785896	2765762	13084895	21298408		2842287	9059420	4941420	9928949	30545694		546594	6260128	8282570
982	fucose	Carbohydrate	Pentose Metabolism	15587	LC/MS Pos Early	918	750	164.092	2438-80-4	19466	2299091	C01018	HMDB00174	7034578					17577050					1393154			23015790	9780691	16217037	14150686	16740887	21733896	15818573	18464176	23325860	11401786	10079087	13774318	13177983	20256368	14793064	28347304	14903044	887779	25752500			15468678	13018059
1132	fumarate	Energy	TCA Cycle	1643	LC/MS Polar	330	3084	115.004	100-17-8	444972	10197150	C00122	HMDB00134	8093631	344534	282592	252457	199373	80447288	194701		914350	578323	1805056		170692	183816624	2862537	27360424	19376904	54729972	15251221	59596468	50006980	59570352	51320408	19075580	25453384	52942224	9905036	34020500	15633808	4000216	11034810	40004292		238871	45038900	17084000
1064	galactonate	Carbohydrate	Fructose, Mannose and Galactose Metabolism	27719	LC/MS Polar	100001026	3085	195.051	299-28-5	128869	114198	C00880	HMDB00565	571322	572767			655872	12870277	231982		3239877	417451	1897570		1518182	35815072	3705060	19556024	775154	159466240	5381239	128259320	1014448	3776767	609438	5939186	3560561	855285	6507714	832968	1321950	15404588	2157680				996773	2153833
54	gamma-aminobutyrate (GABA)	Amino Acid	Glutamate Metabolism	1416	LC/MS Neg	141	684	102.056	56-12-2	119	116	C00334	HMDB00112	1079578					1645261								930311	364431	160863	294216	69957	2925782			10689196		3470828		241975				3775425					109382	278385
3607	gamma-CEHC	Cofactors and Vitamins	Tocopherol Metabolism	44876	LC/MS Neg	100002094	3843	263.129	178167-75-4	133098	117455		HMDB01931						456591									70066		289526					161054		218184		92841	34988			285285	75198					30198
3618	gamma-CEHC sulfate*	Cofactors and Vitamins	Tocopherol Metabolism	62280	LC/MS Neg	100020480	2909	343.086								151133																				708216			94685		566569			157314					136547
461	gamma-glutamyl-alpha-lysine	Peptide	Gamma-glutamyl Amino Acid	55015	LC/MS Pos Early	100010901	2784	276.155		65254	58747			1940085	1403718				4426659	1903676		1601610	2086940	5572888		468757	8501133	1549681	5119688	2617907	4108375	1096171	10467739	3141424	5813822	2431644	2706824	4190672	1630369	2617149	926978	1560948	2157571	2569592	4522410	291002	673161	2133664	3427950
462	gamma-glutamyl-epsilon-lysine	Peptide	Gamma-glutamyl Amino Acid	33934	LC/MS Pos Early	100001262	2717	276.155	17105-15-6	7015685	5378717		HMDB03869	3646526	1734440	242084	214160	1592305	4155640	2162034	161123	2215590	4581843	5040654	98364	356995	1471598	2853188	780109	2244718	381884	891708	2034776	3175777	4752295	1859722	2661628	1357386	1690026	1936920	1116284	1513004	5997728	2878363	1015751	316542	655750	1330571	479895
453	gamma-glutamylalanine	Peptide	Gamma-glutamyl Amino Acid	37063	LC/MS Pos Early	100001843	1986	219.098	5875-41-2	440103	389104		HMDB29142	890741					4074354								10864963	744777	5687018	3559735	4887055	825180	10346726	1310044	4021342	865473	502174	3988073	4014714	5066680	972093	1149313	2418307		6786361			1617993	6748644
470	gamma-glutamylcitrulline*	Peptide	Gamma-glutamyl Amino Acid	62104	LC/MS Pos Early	100020241	1644	305.146						517804	340216				853827			1791929	431250	2419221		241656	2499354	325304	2519803	1444000	2336367		340430	1066782	3202835	177614		1106216	350126	752824	305012	423343		1351183	1304035		64442	330708	2839858
455	gamma-glutamylglutamate	Peptide	Gamma-glutamyl Amino Acid	36738	LC/MS Pos Early	331	1775	277.103	1116-22-9	92865	83831	C05282	HMDB11737	277231	1666350	408662	196685	3566456	1651353	2208136	368951	2252842	3948866	2686441		1051309	16526334		7292786	1756798	4740220		16495237	1322636	1469688	2361359	524964	6191364		3017201				4349119	5687345	213729	1432753	1363290	5007180
456	gamma-glutamylglutamine	Peptide	Gamma-glutamyl Amino Acid	2730	LC/MS Pos Early	1140	1430	276.119	10148-81-9	150914	133013	C05283	HMDB11738	499441	16911			796668	1474014	68379		1239259	77092	2389416		125783	4173081	762013	1350706	1053413	2782048	355151	2154792	1415399	1511488	976372	1363708	991265	838760	599241	418932	293263	272863	193297	1133979			678294	899820
457	gamma-glutamylglycine	Peptide	Gamma-glutamyl Amino Acid	33949	LC/MS Pos Early	100001294	1535	205.082	1948-29-4	165527	145071		HMDB11667	1215639					6164603			752472		2215538			8706469		7586729	2563604	5983121	1050700	20668604	2270014	3193491	2464375		5599249	860649	5455354	666052		2334017	831020	5826713			1479882	5274090
458	gamma-glutamylhistidine	Peptide	Gamma-glutamyl Amino Acid	18245	LC/MS Pos Early	1235	2740	285.119	37460-15-4	7017195	5380197			618447					1533879			357404		278550			3355927	231570	129008	1081805		487887	204699	1324619	1176472	1974048	3443713		1893214	595463	1430052		759098	338946	529090			279265	427322
459	gamma-glutamylisoleucine*	Peptide	Gamma-glutamyl Amino Acid	34456	LC/MS Pos Early	100001485	2940	261.144		14253342	21403145		HMDB11170	846980	252138			166628	3040622			525831	109162	1093306		178680	11688721	775272	7421559	2845191	5259724	387956	12557049	1772917	5304006	1239854	481052	3317617	2340556	3577853	568964	685200	1199487	513936	4951783			1598805	6320794
460	gamma-glutamylleucine	Peptide	Gamma-glutamyl Amino Acid	18369	LC/MS Pos Early	1268	2991	261.144	2566-39-4	151023	133115		HMDB11171	14926809	11468672	3304209	2034959	5439164	43867848	11425347	2572875	28435076	19437248	29786736	581284	2201828	50992976	16600486	15480847	13589896	16345037	9235406	26793336	21516786	28792932	48863752	15123393	9754862	17837166	13963051	17775828	11556772	20238168	20676444	11029050	1372195	5405602	16755411	14508366
463	gamma-glutamylmethionine	Peptide	Gamma-glutamyl Amino Acid	44872	LC/MS Pos Early	100001313	2640	279.101	17663-87-5	7009567	5373147		HMDB29155	803467				1194999	2391143			440211	453497	909137			11829412	799651	4939642	2743265	3513845	766453	7860758	1637040	6003989	1314615	418068	2851631	1698659	3097746	647999	735071	2216204	1390851	3479554			1172791	4305478
464	gamma-glutamylphenylalanine	Peptide	Gamma-glutamyl Amino Acid	33422	LC/MS Neg	100000491	1825	293.114	7432-24-8	111299	99868		HMDB00594	155772					566059			202001		232099			1818721	101595	834210	475483	487981	69313	1847355	260987	692311	262472	60932	538231	275538	483495	132860	108735	141281	30413	495276			145538	468624
465	gamma-glutamylthreonine	Peptide	Gamma-glutamyl Amino Acid	33364	LC/MS Pos Early	100001314	1750	249.108	5652-48-2	76078708	21403107		HMDB29159	900252	645440	92598		787212	4033486	581534		919711	741477	1600124		531712	11440846	1329684	2381854	3446077	3912611	1084145	5527681	1993028	5139058	2794867	253067	4927328	2491382	2982550	879199	879338	1221469	1137273	6547533		103827	1938410	6789114
467	gamma-glutamyltyrosine	Peptide	Gamma-glutamyl Amino Acid	2734	LC/MS Pos Early	1102	2518	311.124	7432-23-7	94340	85142		HMDB11741		536815			119506	1863842			1110625	323746	1463751		207262	5603863	470528	3205212	1994774	2892763	482522	6814931	1089027	3765977	1070639	428018	1662420	1481517	1705677	703059	514522	560438	348086	2417439			866052	2976743
468	gamma-glutamylvaline	Peptide	Gamma-glutamyl Amino Acid	43829	LC/MS Pos Early	100001126	2700	247.129	2746-34-1	7015683			HMDB11172						4521949								18209212		11546161	4378854	8408315		18562228	2482291	7963769			4848177	3402592	6085119	942412	1592887	1509044		6834632			2283849	6374519
3621	gamma-tocopherol/beta-tocopherol	Cofactors and Vitamins	Tocopherol Metabolism	52473	LC/MS Pos Late	100008998	2384	416.364						607375040	110664192	129488256	93977376	138730816	438522272	81089904	28972204	314894144	303881088	193995664	13245969	141144832	295410496	32627264	314059104	518882880	213636864	133305152	304046528	238002544	537881600	105046648	189854464	188514416	205127120	342307840	494567648	511343424	245627664	127871128	239342720	140840320	170775984	263218048	168108976
3606	gamma-tocotrienol	Cofactors and Vitamins	Tocopherol Metabolism	37501	LC/MS Pos Late	100001981	1918	410.318	14101-61-2	5282349	4445514	C14155	HMDB12958	12690203	15443409	5538343	7945186	11152179	49231880	5505928	2530752	26638384	34364140	19881386	827571	14657162	9440720	7324959	40397496	23129214	48894732	10891430	16699312	25738774	31839224	7337458	14615558	27607626	37004656	51735084	14120125	35593560	50925928	8172331	10542743	1890127	3097406	13025210	11617259
178	gentisate	Amino Acid	Tyrosine Metabolism	18280	LC/MS Neg	100000447	1459.8	153.019	490-79-9	3469	3350	C00628	HMDB00152	331973		111624		504010	7162653	81308	27190	7443001	91178	1189556			9848195	920008	31673	1739345	893187	4641083	479518	342619	7546102	410727	74153288	2157801	2210423	410117	2091980	80621	5299360	1607148	2084997		243850	751898	186327
3927	gluconate	Xenobiotics	Food Component/Plant	587	LC/MS Polar	338	2922	195.051	527-07-1	10690	10240	C00257	HMDB00625		757184	197992		1101153	22485132	1451007		6507192	1125405	2011225		2368956	1739479	2014660	8086964	1479824	1095184768	41840328	366014208	8621800	3311750	6325521	22842088	35024244	666214	2728988	408934		14525378	1653196	170352416			2328928	4351136
929	glucose	Carbohydrate	Glycolysis, Gluconeogenesis, and Pyruvate Metabolism	48152	LC/MS Polar	572	2342	225.062	50-99-7	79025	71358	C00031	HMDB00122	26163396	22084078	8859018	7179109	19670808	523472224	56367920	2004427	133752640	50451572	103375408	10600912	2653106	958838912	450605376	23422448	268844544	73967848	536157248	34309228	683669760	678285504	56827196	630974720	93571392	292839040	8488347	291555808	120583648	590657088	99366096	1318487296	1048487	10840017	65904032	221697600
1092	glucuronate	Carbohydrate	Aminosugar Metabolism	15443	LC/MS Polar	100000257	3233.3	193.035	207300-70-7	444791	58552	C00191	HMDB00127	12572609	18001020	2321207	5316771	9253676	184249552	22176492	689033	25833236	14279616	29081828	3900325	3435883	173179760	57036856	9452640	38585692	52017936	35773036	27228496	76936248	95380848	24337104	37330984	36949304	79909840	18727668	21605684	23710552	97700520	40760940	37463612		5692408	17628764	28862286
41	glutamate	Amino Acid	Glutamate Metabolism	57	LC/MS Pos Early	561	1500	148.06	56-86-0	611	591	C00025	HMDB00148	2145458048	1339419520	172076064	167120528	775778880	4790907904	597613248	58940368	1676611840	1081382912	2773764352	31813548	419984256	5251968000	1837797504	3664815360	3079296768	1913914880	1076684800	7709111808	2441269760	4994798592	3244085760	458972544	3631035136	2561640192	4002689024	1401336448	2005491968	1711901696	1996566784	3095872512	50636876	474857184	2626568448	2655916288
50	glutamate, gamma-methyl ester	Amino Acid	Glutamate Metabolism	33487	LC/MS Pos Early	100001103	2170	162.076	1499-55-4;1499-55-4	68662	66546		HMDB61715	4015882	616244		180136	147792	9188223			2443814	635096	5850469			16838124	2705556	4635228	5672609	2169261	2613236	5054815	3140119	14433983	3333628	1676736	3792133	2902237	3529947	3252603	1601321	4659406	2046756	5391058		810710	9249429	3537367
42	glutamine	Amino Acid	Glutamate Metabolism	53	LC/MS Pos Early	563	1291	147.076	56-85-9	5961	5746	C00064	HMDB00641	222456320	39669988	3271356	4753128	38982972	629585600	14501697	650503	109836088	31327256	142518880	767710	18185432	466696448	255951808	191243632	327966496	264335472	187829664	230259088	411902080	428226912	459648832	120301048	205978992	259931776	296527424	218761760	356050720	345405728	67804928	135905824	2486452	6329807	247965840	110542560
591	glutaminylleucine	Peptide	Dipeptide	42994	LC/MS Pos Early	100003160	3009	260.16						24510344	22283972	7554479	3801134	15272749	11665189	27112212	4397968	40300132	34994584	41034784	2231103	5061589	20688666	34467836	2767005	6789678	8052009	8422798	5960263	14373269	28100458	28653730	33924556	4374052	15638778	8585857	12484049	16521079	31136436	38388648	6283620	5479055	11603906	10022156	10632689
1307	glutarate (C5-DC)	Lipid	Fatty Acid, Dicarboxylate	396	LC/MS Polar	339	2900	131.035	110-94-1	743	3618533	C00489	HMDB00661	154742400	80453768	14077575	5993527		50025132	37258440	1457397	33484892	61069104	20390598	2464901	548880	97947024	44121468	431977536	278167680	6374075	73751440	270372480	156365456	337699072	287835008	45516904	11459650	100743320	66329532	146177280	177217952	80710232	56728624	175560192	543515	37758020	186843200	12004903
949	glycerate	Carbohydrate	Glycolysis, Gluconeogenesis, and Pyruvate Metabolism	1572	LC/MS Polar	1052	2070.4	105.019	600-19-1	752	732	C00258	HMDB00139	8419323	16161773	3382587	2939596	10708869	161176080	10203381	1095543	58485116	21574440	32895320	2202296	5066921	315899584	20675906	37181684	23658744	117562256	25714378	41604120	20033624	86921240	23776236	51392332	33496814	28186272	35880856	11139434	14175874	355410880	20516864	63642708	3247777	4038922	22531326	33609592
2289	glycerol	Lipid	Glycerolipid Metabolism	15122	LC/MS Neg	1254	758	91.0401	56-81-5	753	733	C00116	HMDB00131	6971366	3119099	2347892	2395793	2750049	41695132	2429379	3074853	9148549	3638622	6902696	911811	1850684	44809984	6656393	8067137	31406646	14860770	14496488	23334480	8277582	34569124	6421428	18608714	34326644	22006698	3605019	9652445	8651054	69410120	15328982	24661774	1811611	11845641	42560648	21074144
2290	glycerol 3-phosphate	Lipid	Glycerolipid Metabolism	43847	LC/MS Pos Early	100000258	580	173.021	29849-82-9	754	734	C00093	HMDB00126	340892	469751	976769	480362	1819624	2134007	1308171	821069	110329	143466	1681628			4643929	910723	3776484	1494667	6491428	4343751	2967761	3183413	4030679	3450162	2929132	2685526	741656	7704537	1570249	1814683	3116777	114071	7996435	99828	1860595	3031723	2618151
1744	glycerophosphoethanolamine	Lipid	Phospholipid Metabolism	37455	LC/MS Pos Early	100001620	659	216.063	33049-08-0	123874	110410	C01233	HMDB00114	3621151	3909030	4340908	2762483	7044455	36063320	4223078	1463912	37953300	35282528	9225137	1455559	655478	32909374	1994143	25032356	27690016	11083507	57542732	26304956	15094023	15891963	5568514	17209468	22973618	5023512	8611183	41823292	12141037	3624976	10925458	9291163		3836325	8565687	15743059
2295	glycerophosphoglycerol	Lipid	Glycerolipid Metabolism	48857	LC/MS Pos Early	100001619	520	247.058		439964	388990	C03274		933887	484566	531864	100205	299851	25652140		689192	6614916	534047				73740592	26094100	18805174	29331916	46778264	76187896	20350384	55575504	126482208	60977360	88636344	24918340	18651952	35450740	52078572	56661620	83952712	1416015	39483904		970778	85724512	20612732
1746	glycerophosphoinositol*	Lipid	Phospholipid Metabolism	47155	LC/MS Polar	100001621	3850	333.059	16824-65-0	167572									14584780	189127		2028384	1115453	190521			1630002	557719	453421	383841	873568	3120906	1916974	343210	727673	380825	1261639		108443	136022	4867311	274028	1625898	342064	1937958		883590	652156	770635
1740	glycerophosphorylcholine (GPC)	Lipid	Phospholipid Metabolism	15990	LC/MS Pos Early	100000269	672	258.11	28319-77-9	71920	571409	C00670	HMDB00086	711702	1413100	2328627	2787579	1700519	32092774	1725237	1468653	6041643	1363855	2188199	1772178	1131105	49525212	1893272	4223099	4390719	7832094	19097084	9936032	9593656	3926003	3940949	11141252	2464354	15030263	4245831	2331071	4491277	4009031	2252555	3220725	1349325	7281995	6314814	2710345
1745	glycerophosphoserine*	Lipid	Phospholipid Metabolism	57404	LC/MS Pos Early	100015666	577	260.053		3081457	2339060			218208					7022835				113035	67426			5028460	634386		1351310	1367150	3221395	439277	753493	711904	580614	1721631		620877	342470	1842136	549247	1546370		1839235			796761	1364861
1	glycine	Amino Acid	Glycine, Serine and Threonine Metabolism	58	LC/MS Pos Early	340	1375	76.0393	56-40-6	750	730	C00037	HMDB00123	128864336	49222208	6106218	5098266	27941060	232081632	15290567	1396419	45414968	19465642	132225784	2625747	15005335	181234784	62433584	162993360	88098672	75512816	42949204	448652192	99914088	182582832	144580736	23063940	158646816	104070728	243216176	40027304	133008440	73957672	36164500	115392448	1957810	6734788	58484476	120220984
2759	glycochenodeoxycholate	Lipid	Primary Bile Acid Metabolism	32346	LC/MS Neg	1628	5236.1	448.307	16564-43-5	12544		C05466	HMDB00637		166346		713803	235438	3992675			184472	1005824				6240929	10159481	253006	3904479	1560955	1029780	148349	226121	3888484	590649	197774	488391	2291857	168782	1399044	1407634	7286324	354907	925545			1895241	378331
2756	glycocholate	Lipid	Primary Bile Acid Metabolism	18476	LC/MS Neg	342	5163	464.302	475-31-0;863-57-0	10140	9734	C01921	HMDB00138		264411	624123	300037		1229287			62066	226157	172643			1516724	19925898	81291	3619263	1241475	503832	85459	140843	384427	154197	197062	200896	694508	94094	429332	408973	2607537	110406	1154028		91517	632935	219681
2810	glycocholenate sulfate*	Lipid	Secondary Bile Acid Metabolism	32599	LC/MS Neg	100001989	4750	254.623																220298						40078		98905			51187		831394		81331		93231	252252	1349122						133863
2777	glycodeoxycholate	Lipid	Secondary Bile Acid Metabolism	18477	LC/MS Neg	100000436	5281	448.307	360-65-6	3035026		C05464	HMDB00631	293667	410613	363676	983322	332100	2422180					775879		797827	3669971	1423416	328163	4993262	1182047	1170747	384675	611959	320667	1599960	503796	1110839	1684229	2300506	1074839	2695101	3042427	426480	1722416			2345163	541187
2784	glycolithocholate	Lipid	Secondary Bile Acid Metabolism	31912	LC/MS Neg	100001064	5357.1	432.312	474-74-8	115245	103116	C15557	HMDB00698		106519			76283	155236			48015	92221	324379			417476		123759	200644			255789	71863	141278	41091			338255			943957			57845
2785	glycolithocholate sulfate*	Lipid	Secondary Bile Acid Metabolism	32620	LC/MS Neg	100001657	5011	255.631	15324-64-8	72222	65188	C11301	HMDB02639											1208549			785558	131603		87675				22223	121911	47368	842194					344412			40759			53879	220512
2481	glycosyl ceramide (d18:1/20:0, d16:1/22:0)*	Lipid	Hexosylceramides (HCER)	57595	LC/MS Pos Late	100015882	3414	756.635																			1076831			232150				1002470	796794		3622473		265603	373594		554837	3256127
2467	glycosyl-N-(2-hydroxynervonoyl)-sphingosine (d18:1/24:1(2OH))*	Lipid	Hexosylceramides (HCER)	57444	LC/MS Pos Late	100015752	3839	826.677						220124					265324								4258387	396226		296679		2122209	464974	1723404	1507988	346559	19417972			1203244	293109	2791542	3621137		236939				678325
2466	glycosyl-N-nervonoyl-sphingosine (d18:1/24:1)*	Lipid	Hexosylceramides (HCER)	57369	LC/MS Pos Late	100001878	3990	810.682						374701					1341270								5495288	710816		952693	933786	648377	1292496	3660301	3531499	2130104	77090816			2059105	580958	1560355	4234564						285698
2460	glycosyl-N-palmitoyl-sphingosine (d18:1/16:0)	Lipid	Hexosylceramides (HCER)	53013	LC/MS Pos Late	100009272	2623	700.572						718257	360605	745553	211878		2472002					1122531			12208529	1674746		2829333	2461800	7508288	2285805	8302814	9670689	959442	13686028	441621	2565552	3658470	2011518	6607020	18021848	631684	1792268			1540802	1557755
2461	glycosyl-N-stearoyl-sphingosine (d18:1/18:0)	Lipid	Hexosylceramides (HCER)	52234	LC/MS Pos Late	100001882	3053	728.604											431412			301785					4381912	564834		2267783	1188913	495521	1051684	3284187	1623476	660820	41822524		679715	2612000	1410989	1445945	1981921		481781
2792	glycoursodeoxycholate	Lipid	Secondary Bile Acid Metabolism	39379	LC/MS Neg	100002911	5033	448.307	64480-66-6	12310288	19973534		HMDB00708	80002				71404	1113980					72109			484473	427686	60324	199323	60357	121787	13342	52040	57149	100541		95178	212805	34219	173952	136931	796204	43362	31097
613	glycylisoleucine	Peptide	Dipeptide	36659	LC/MS Pos Early	100001790	3002	189.123	19461-38-2	88079	19972556		HMDB28844	11791001	11371456	2446906	1638659	6064805	33436542	14943478	1062196	13962919	12747571	28842238	772640	2734621	30828304	33302560	2517660	13892134	10020840	6562124	22517724	27898224	19288194	38878508	9506309	6428287	47262204	23964044	9429845	9843897	9832172	12914582	10733468	2121084	4447513	13211585	8566962
614	glycylleucine	Peptide	Dipeptide	34398	LC/MS Pos Early	100001258	3059	189.123	869-19-2	92843	83812	C02155	HMDB00759	29726034	22553820	3529344	4017045	21928528	22375428	30708232	1629058	64653832	53403612	69273688	1111811	4390996	27988620	26408698	1950158	18575564	4368572	7364450	6943034	23107048	46741972	29368176	39279244	7638885	25700480	19241906	12371028	15074564	59259392	33940884	5842636	2664164	6865984	7468855	6925996
624	glycylvaline	Peptide	Dipeptide	18357	LC/MS Pos Early	100000487	2734	175.108	1963-21-9	97417	2006926		HMDB28854	39170068	35349808	4755670	3818984	15994040	147752640	34008788	2214234	58158348	52643512	74753528	1476070	6264123	131554520	75819560	12026018	68807040	29834564	30271638	46694584	86466648	100038832	84547472	45477516	31572520	114477920	56327600	50612872	76884768	81228160	38650812	28749456	5145561	7876331	36897352	23216188
4023	glycyrrhetinate	Xenobiotics	Food Component/Plant	39789	LC/MS Pos Late	100002856	1494	471.347	471-53-4	18526330	17930566	C02283	HMDB11628																14479232		8838075	1764437	2341720					1321243			7095443	66898564					11377134
400	guanidinoacetate	Amino Acid	Creatine Metabolism	43802	LC/MS Pos Early	344	1937	118.061	352-97-6	763	743	C00581	HMDB00128		546692		89753	1231280	2240860	534304	58069			157216	58078		2192543	945864				89816	121728				2937065		238476			142917	2820180					2673348
3445	guanine	Nucleotide	Purine Metabolism, Guanine containing	32352	LC/MS Pos Early	172	2032	152.057	73-40-5	764	744	C00242	HMDB00132	18524892	7727184	16747380	10901326	14796077	74253584	4972698	1540909	16633169	15147618	45401040	11926785	8631021	127959080	101464640	33587760	179785888	65205416	97772000	22668520	14705983	88912376	144041872	163330224	69575264	35682296	57661392	48433196	35445572	374512064	83568328	54362732	736613	9520569	67890312	82962744
3444	guanosine	Nucleotide	Purine Metabolism, Guanine containing	1573	LC/MS Neg	1099	1662	282.084	118-00-3	6802	6544	C00387	HMDB00133	327869	172324	279302	236044	209037	8210578	68290		736759	340718	472305	328704	96516	3057254	7672000	1247660	9680449	883075	4063929	182164	2351756	3065941	1568150	3476616	3737365	37360		2658884	1428879	17942432	903541	1001644		256165	110500	4739903
3442	guanosine-2',3'-cyclic monophosphate	Nucleotide	Purine Metabolism, Guanine containing	37139	LC/MS Neg	74	1480	344.04	15718-49-7	92823	369712	C06194	HMDB11629	53509	31028	56590		25405	155821					164502			146393	105002		1752711	133103	1508176			1115399		112627	168475					763064	942497			45927		3743648
4182	harmane	Xenobiotics	Food Component/Plant	27536	LC/MS Pos Early	100000799	3234	183.092	486-84-0	5281404	4444755	C09209	HMDB35196	7159739	330622	1038865			441933	190925				755860			3292889		351228	1337192	720231	270919	2420600	119902	2469838	2110623	508199	1297012	299274	985247	2209802	171878		263123	512601		252261	378823
2540	heptadecasphingosine (d17:1)	Lipid	Sphingosines	57427	LC/MS Pos Late	100015724	1377	286.274	6918-48-5	5283557	4446670			444807							370585							1666776			3202614	237921	451429		2593612	1206373	3985092	305611	15232366		17424488	797591	7540561	6533579	521061			1481824
1166	heptanoate (7:0)	Lipid	Medium Chain Fatty Acid	1644	LC/MS Neg	925	3670	129.092	111-14-8	8094	7803	C17714	HMDB00666	7980225	2479927	16842572	1205288	2702313	10392166	2108776	1455186	1920434	11519210	10625577			80049968	27414100	25438640	87863776	30774652	280524160	162628736	5991247	17202124	5950558	8910389	55355896	8764326	94005512	92649472	44352876	22211206	6508573	41557568	2331003	11123877	18807096	12679677
1321	heptenedioate (C7:1-DC)*	Lipid	Fatty Acid, Dicarboxylate	61866	LC/MS Polar	100019981	2816	157.051						2061937	497826				1289419			1100002	360509	701119			1912898	782012	1612475	918146	1263423		2879953	1038473	1558802	1468659	480625	1891277	1056883	978582		1147790		623964				2027237
4025	hesperetin	Xenobiotics	Food Component/Plant	27514	LC/MS Neg	100001039	3679	301.072	41001-90-5	72281	65234	C01709	HMDB05782						92273	34399				55704			35375	22307		237693	2302424	190080							28367	2352232	197866				356505		60983		19168
4168	hesperidin (hesperetin 7-rutinoside)	Xenobiotics	Food Component/Plant	21300	LC/MS Neg	100000838	3867	609.182	520-26-3	10621	10176	C09755	HMDB03265														143084				1573576									262759					212953
1215	hexadecadienoate (16:2n6)	Lipid	Polyunsaturated Fatty Acid (n3 and n6)	57652	LC/MS Neg	100009394	5398	251.202	28290-73-5		13628094		HMDB00477	1189147	13239868		674392	737654	8152330	651177	522445	8042322	9907660	3582014	794273		3937598	1860598	3129299	12617715	3015298	2232946	1838622	3992849	3246634	1077363	7507294	2131704	4918642	1558197	2604048	1529333	8989876	1560579	8502261	1509400	3730300	3665207	3389189
1334	hexadecanedioate (C16-DC)	Lipid	Fatty Acid, Dicarboxylate	35678	LC/MS Neg	100001614	4615	285.207	505-54-4	10459	10027	C19615	HMDB00672	655982		211754		1113052	716216	86348		174505		1564652			617434	281111	573382	2012155	958782	552761	977569	1074252	696307	370720	1100882	1347927	598870	389682	1225918	423785	776055	874507	594971	207490	239946	744751	724572
2417	hexadecasphinganine (d16:0)*	Lipid	Sphingolipid Synthesis	57544	LC/MS Pos Late	100015865	1300	274.274		656816	571105	C13915		10595808	8050209	851860	2327640	1913740	19607050	1135244	2344293	13059394	3357612	8664842	772115	898510	9333789	8756727	7118348	32081998	28623120	3490399	7723157	6341244	18917284	16741851	10721760	4716324	53919204	5676700	33738840	8248315	33486118	35015040	7288373	1002918	1874561	13921922	2244215
2539	hexadecasphingosine (d16:1)*	Lipid	Sphingosines	57428	LC/MS Pos Late	100015723	1289	272.258			28533427			597798	2287587		863045	220614	20647400	202616	693928	892957	348300	1832129	739435		9601357	1103486		11656666	3230923	736343	657588	156998	5035612	1139830	4214818	1016490	23112014	456998	5119637	3369082	9512976	13435547	765238	203466	216677	1379414	285370
1216	hexadecatrienoate (16:3n3)	Lipid	Polyunsaturated Fatty Acid (n3 and n6)	57651	LC/MS Neg	100009393	5330	249.186	7561-64-0	5312428	4471853			392116	1840123			375182	3947479	56293	390592	1018501	713247	410701	45452		610750	3524466	500161	2150262	986352	744364	242373	1893295	890026	147820	1147640	355405	721133	167587	628877	669505	2579603	219151	335919	298289	226749	169525	769792
1336	hexadecenedioate (C16:1-DC)*	Lipid	Fatty Acid, Dicarboxylate	61862	LC/MS Neg	100019975	4380	283.191											93553											242145				131848			434846		92987		127356	136157	281292		53194		25306
1420	hexanoylglycine	Lipid	Fatty Acid Metabolism(Acyl Glycine)	35436	LC/MS Neg	100001527	2900	172.098	24003-67-6	99463	89859		HMDB00701	660101	44566									168119			325290	77797	68873	88287		71498	1276391				103209	327609		1710866	27024	157215	774162	71921	562250			285945	139037
3686	hippurate	Xenobiotics	Benzoate Metabolism	15753	LC/MS Neg	100000014	2106.9	178.051	495-69-2	464	451	C01586	HMDB00714					9081896		186159								165028		115905
81	histamine	Amino Acid	Histidine Metabolism	1574	LC/MS Pos Early	354	3035	112.087	51-45-6	774	753	C00388	HMDB00870	275459	642944	987911		248525	12230594	3858181		29286936	800510	6894588		134202	250074896	843200		141719376	311444	18967268	2890367	13257807	119858272	23568824	71951456	64872732	4973193	69861440	240981056	339479	9381993	3313882	1069099			455938	34890952
65	histidine	Amino Acid	Histidine Metabolism	59	LC/MS Neg	355	755.9	154.062	5934-29-2	6274	752	C00135	HMDB00177	14267548	1295694	569932	242371	2505508	26754700	2693496	89071	5501887	2371585	10284868	63933	676882	12749153	14713886	5987555	10607804	3423046	5589002	7853155	11975649	25515542	19538538	8457995	6775269	10300168	17926728	4115348	3362727	17802680	8614049	6286632	125265	1409693	8380115	7911969
4026	histidine betaine (hercynine)*	Xenobiotics	Food Component/Plant	62278	LC/MS Pos Early	100004059	2094	198.124	534-30-5	3083620	2340795					48476			7714414			640803	183688		61367			512466						9518580			1380876		3660726			10843008	7433391	2039318
629	histidylalanine	Peptide	Dipeptide	42027	LC/MS Neg	100003542	970	225.099	16874-75-2	351667	312232		HMDB28878	92189	273094			142669		295515		575521	768422	534585			147961	79495							187848	123172	250168					101318	259070	258245		26598
375	homocitrulline	Amino Acid	Urea cycle; Arginine and Proline Metabolism	22138	LC/MS Pos Early	100000963	1908	190.119	1190-49-4	65072	58582	C02427	HMDB00679					369675	2634495		237047	3502161					2455689	5249877	985313	1082223	524078	558777	778347	31374386	4389631	4651685	5236867	813852	1419401	954109	2744590	688183	3016010	190267	1792419			1352689	1653897
4029	homostachydrine*	Xenobiotics	Food Component/Plant	33009	LC/MS Pos Early	100001550	1750	158.118	1195-94-4	441447	390180	C08283	HMDB33433	1049916	476272		200442	262519	2753609	65502		1527032	434232	354414		136606	7159802	559281		1031834	541462	591807	7961154	2768164	2788700	569984	421386	6919591	1024425	1528387	888490	4538965	1101563	2128704	585914			4131033	335355
71	hydantoin-5-propionate	Amino Acid	Histidine Metabolism	40473	LC/MS Polar	100002514	2080	171.041	5624-26-0	782	761	C05565	HMDB01212	399375				168278	1827151			1517323		241312			912548	198011	1349883	438696	881212	109745	2740446	387667	1647287	2824910	3552804	761877	1808945	1415809	466963	1296774	2612153		475652			760115	694646
4518	hydrochlorothiazide	Xenobiotics	Drug - Cardiovascular	39625	LC/MS Neg	100002734	2046	295.957	58-93-5	3639	3513	C07041	HMDB01928														2299622					22780952
3660	hydroxymethylpyrimidine	Cofactors and Vitamins	Thiamine Metabolism	57565	LC/MS Pos Early	100003365	2207	140.082	73-67-6	777	756	C01279		1750623					1549069				167393	2054067			41614356	1270576	6329925	1531003	3723202	1577514	2506567	1485521	4721515	2051542	2196046	2360907	1898688	4172862	1727235	2195116	563083	145690	4830851			3364737	2914850
2800	hyocholate	Lipid	Secondary Bile Acid Metabolism	34093	LC/MS Neg	100001279	5046	407.28	547-75-1	92805	21403098	C17649	HMDB00760	226761			131466	424545	7142826	137103	83439	255587	317916	444770	82996		398726	130261		435173	108046	148725	85761	498754	289392		3223573	284592	511307		390299	697545	3801895	511822	150110	91164	65905	103684	69955
3387	hypoxanthine	Nucleotide	Purine Metabolism, (Hypo)Xanthine/Inosine containing	3127	LC/MS Neg	171	1291.2	135.031	68-94-0	790	768	C00262	HMDB00157	6114802	329896	639865	226419	504990	95215648	580441	115212	5343395	1690510	1601066	552048		166430944	36894128	32508412	61231236	37382832	32662022	43539988	20023070	65157852	23975200	17565912	36630636	42258336	25843870	35123796	15179730	28584832	9343969	50640008	288265	1331340	28313496	51058468
3648	I-urobilinogen	Cofactors and Vitamins	Hemoglobin and Porphyrin Metabolism	32426	LC/MS Neg	100001226	4190	591.319	14684-37-8	26818	24980	C05790	HMDB04157						403949								354412	149206		257564				1063629	263121		7770151		7855240		65400
4356	ibuprofen	Xenobiotics	Drug - Analgesics, Anesthetics	17799	LC/MS Neg	1487	4925	205.123	15687-27-1	3672	3544	D00126	HMDB01925																	20081816																	251741
76	imidazole lactate	Amino Acid	Histidine Metabolism	15716	LC/MS Pos Early	100000263	2040	157.061	14403-45-3	440129	389128	C05568	HMDB02320	777410	1571847	559141	455465	2287699	5131401	1534237		3401520	3589353	3403237	173419	1756017	4364783	1062023	1794109	2399200	695900	1172114	6881806	1077993	2272929	908009	29044676	1830543	1294905	3339432	2394168	823180	8959876	670260	2974844		679635	2245766	4112964
74	imidazole propionate	Amino Acid	Histidine Metabolism	40730	LC/MS Pos Early	100003434	2263	141.066	1074-59-5	70630	63798		HMDB02271	716779008	632650112	28449410	61502368	171354704	3860576	66711836	2738058	194356672	72916256	874654400	4440624	113214656	8796082	3015979	38827028	312912768	3365353	5346829	115471720	388122624	49532936	25742524	550777600	340124992	922583424	509833568	13640275	249023520	277086496	38086704	139298288	2267899	10888498	5494239	280430880
245	indole	Amino Acid	Tryptophan Metabolism	33965	LC/MS Neg	100000264	4302	116.051	120-72-9	798	776	C00463	HMDB00738	1251670	12612402	6709491	13349180	1911541	874380	2010033	660862	5756879	15844566	7889885	2444844	4232560	350286			683428		84834	371301	787244	32430	703796	99685	416462	157550	3855372	201986	432795	158542	5307065	34106	811399	6714085	237826
246	indole-3-carboxylate	Amino Acid	Tryptophan Metabolism	38116	LC/MS Neg	100002185	1710	160.04	771-50-6	69867		C19837	HMDB03320	83108	43154	18204		83712	81193				21918	125200				102977	1682424	324572	417424	107100	1141358	241319	129312	185696		181931	180062	690888	125787	282361	200929	87083	117584			139976	281285
239	indoleacetate	Amino Acid	Tryptophan Metabolism	27513	LC/MS Neg	100001034	2200	174.056	6505-45-9	802	780	C00954	HMDB00197	412599	83851	89781		201955	20085636	124843	119211	1244666	2054683	838125		30897	5419528	521279	413502	1729699	373353	1727770	1133051	453732	5501238	198308	2429948	1681495	1634646	782615	835778	439129	623514	1385625	7880265	32546	451733	604344	443328
4032	indoleacrylate	Xenobiotics	Food Component/Plant	22114	LC/MS Neg	100000800	2511	186.056	1204-06-4	15030923	4524636		HMDB00734						103880			46498					91078					36687	67653		1192259					20329		272268			41977			80336	57740
238	indolelactate	Amino Acid	Tryptophan Metabolism	18349	LC/MS Neg	100000463	2286	204.067	832-97-3	92904	83867	C02043	HMDB00671	572977	157555			447582	2319791	149016		836684	51062	1463522			15470757	144040	817140	370926	535825	309243	2893325	746603	1177974	1769796	612894	1067593	3381545	6525117	629030	1013203	10454012		747294		99653	579014	832483
241	indolepropionate	Amino Acid	Tryptophan Metabolism	32405	LC/MS Neg	100001083	2795	188.072	830-96-6	3744	3613		HMDB02302	513066		32980		503095	6664535	41351	16947	1961567	110609	888639			3775715	2136854	266067	2211102	398813	4668073	1334336	1625974	38006360	777800	6330744	646573	3197063	801425	1783945	1809468	5651352	897526	1052584	23765		1486132	896874
4033	indolin-2-one	Xenobiotics	Food Component/Plant	43374	LC/MS Pos Early	100004318	2575	134.06	59-48-3	321710	284794	C12312		13057552	10399580	2318090	5486732	20874204	6345559	5622367	5554150	9514078	47574280	88048768	5301575	20184256	37001688	42257796	43440576	12006452	47532172	64016800	195195584	6711898	165488480	86996000	9770598	281020160	80269160	61827212	127479576	139506784	18838428	18050860	22105514	13148562	36814952	10510370	34933776
3386	inosine	Nucleotide	Purine Metabolism, (Hypo)Xanthine/Inosine containing	1123	LC/MS Neg	361	1602.1	267.073	58-63-9	6021	21241953	C00294	HMDB00195	2743012	147145	324972	220960	227149	21133764	198688	29582	1306340	425633	663356	678973	261270	16931472	12249124	4716353	29136728	3488264	14026440	3724837	8624003	23836422	5206278	3431808	28660382	837986	7338297	19351996	7425460	15698974	640391	12199295	65831	654548	3432857	29298696
322	isobutyrylglycine	Amino Acid	Leucine, Isoleucine and Valine Metabolism	35437	LC/MS Neg	100001590	1420	144.067	15926-18-8	10855600	9030891		HMDB00730	229993					830000					259985					820973	738227	655462	439862	1084952	540529	420147	314437	70150	464539	350985	515664	467871	1891971	177544		435148			730497	326659
1286	isocaproate (i6:0)	Lipid	Fatty Acid, Branched	22273	LC/MS Neg	100000806	2570	115.076	646-07-1	12587	12067		HMDB00689						795341			523799		1115841			1399831	1482280	1912994	879026	1079198	1224367	1116051	1058042	4246582	2703411	1991146	1588130	17678902	5049022	1177542	1968775			2384744				930432
1127	isocitric lactone	Energy	TCA Cycle	54724	LC/MS Polar	100009239	2970	173.009	4702-32-3	98259	88729			352757			843097	312560	4814760								1139999	763678		937048	2020835		1185005				582038	2303668				308277	1242698		352515	867981		487602
292	isoleucine	Amino Acid	Leucine, Isoleucine and Valine Metabolism	1125	LC/MS Pos Early	376	2800	132.102	73-32-5	6306	769	C00407	HMDB00172	1927106176	1016564096	79766656	73182160	473171712	3561951232	274664160	22802300	1198370432	332091136	1839187968	17346292	250569696	1754658048	2180686848	3086171136	2387933952	1769532288	1266219264	5062674944	2479248128	3884659456	2785923328	1049847808	2586465536	2846613760	3537897216	1415668480	2941970688	2846472704	451941376	2159784704	17156770	63332368	1869355648	2480867584
648	isoleucylglycine	Peptide	Dipeptide	40008	LC/MS Neg	100003169	1992	187.109	868-28-0	342532	303621		HMDB28907	19672268	7228853	1788481	2076869	8214184	1422673	5343352	213082	19790080	11226790	24081784	319539	1120725	2265750	5751829	666831	838053	972026	1075626	802304	1596736	2781643	9310268	2965530	837410	2084144	3626643	1820064	1582220	1666134	8695201	964662	468289	2014422	811734	2314768
2791	isoursodeoxycholate	Lipid	Secondary Bile Acid Metabolism	57577	LC/MS Neg	100002488	4809	391.285	78919-26-3	127601	113205	C17662	HMDB00686	3103083		183775		281797	68462936	346193	237523	238229	739752	2056864			2052248	1447054	461165	2785941	395097	1845433	502977	763214	1333591	311560	32158454	4381008	6476239	467791	2202955	1285237	91342440	2513214	1030986	51797	353438	451341	449444
267	isovalerate (i5:0)	Amino Acid	Leucine, Isoleucine and Valine Metabolism	44656	LC/MS Neg	100000708	1564	101.061	503-74-2	10430	10001	C08262	HMDB00718	2361206	1348241	1496042	2459124	1051029	56192960	794928	397515	2279946	8873625	9896119	1160232	2817552	42086600	6815252	92065704	88114160	52962968	31481204	107934832	35232256	90898448	64605392	9088132	73914624	69972560	63462296	76795232	157869792	12656617	1729017	23975410	953917	1432126	10661411	17878012
268	isovalerylglycine	Amino Acid	Leucine, Isoleucine and Valine Metabolism	35107	LC/MS Neg	100001452	1950	158.082	16284-60-9	546304	475516		HMDB00678	835729	393473			279457	1431340			173337	301334	722236			768978	326167	1438280	2116672	1293136	860825	2909747	1300833	872502	672540	184714	1403178	539590	1190817	941970	3497361	682047	351604	1153947		382778	1659488	678679
222	kynurenate	Amino Acid	Tryptophan Metabolism	1417	LC/MS Neg	98	2224	188.035	492-27-3	3845	3712	C01717	HMDB00715	159173		23143	353666	1818509	2958377	926301	18301	5584293	4474186	194573	47153		7323891	1123756	615012	4466938	352968	1145669	1282672	166203	10826128	214569	3482837	141204	2486208	170848	3776373	1809948	2804640	1583570	3286985	33164	222133	1827681	198005
218	kynurenine	Amino Acid	Tryptophan Metabolism	15140	LC/MS Pos Early	100000265	2739	209.092	2922-83-0	161166	141580	C00328	HMDB00684	536350		79197		58262	901924	134574		802476		118782		173001	694408	296793	279210	298716	188416			290777	671798		568415		446649	564906			321878	205046	250517	52580	96533	402305	95449
3650	L-urobilin	Cofactors and Vitamins	Hemoglobin and Porphyrin Metabolism	40173	LC/MS Neg	100002568	4624	593.334	34217-90-8	5280818	4444369	C05793	HMDB04159	68137920				37153104	4878170					89870144			73761784	851664	71692808	206543616	28911356	81792696	55257352	25345942	78570464	46010220	52481024	136123824	40705796	36527872	143177648	242396912	102079152	82339552	46877768	2305515		32206828	24591368
946	lactate	Carbohydrate	Glycolysis, Gluconeogenesis, and Pyruvate Metabolism	527	LC/MS Polar	482	1468.8	89.0244	79-33-4	612	592	C00186	HMDB00190	79684304	29813638	12122024	4390722	8579535	22881648	9152015	5031250	30869740	25359972	93778880	6383890	6848287	889192064	25777980	21477732	30841376	24618476	29674864	10368199	15187107	25522210	10457538	55049864	39684988	19785500	323549440	11656127	18378792	986596928	19732332	21513108	7256557	2703313	6539477	17061160
2491	lactosyl-N-nervonoyl-sphingosine (d18:1/24:1)*	Lipid	Lactosylceramides (LCER)	57370	LC/MS Pos Late	100015620	3778	972.735			24846896				245392				4325366					275462			3419355	353692			1081719	757397	1500826	9763712	4004953		10477326			1808289		4664830	595266						1466655
2487	lactosyl-N-palmitoyl-sphingosine (d18:1/16:0)	Lipid	Lactosylceramides (LCER)	53010	LC/MS Pos Late	100009030	2527	862.625	4201-62-1					568115	1278264		948621		9580757		341199	336627		1052428			10413886	1397599	721185	2274172	2535369	2209817	3978674	22169294	9048803	909797	22498940		1076886	4003153		12075795	2866045	921345	612962			456431	3850805
1284	LAHSA (18:2/OH-18:0)*	Lipid	Fatty Acid Hydroxyl Fatty Acid	57390	LC/MS Pos Late	100015655	2936	580.53						488971		10964615			7351696			2474580		215020		501000	296559		3934572	2550159	4480137	257061	1446274		2432322		4939316	366039	3201752		427213		3428284	1872335	1150746		6888081	11700077	468973
4593	lamotrigine	Xenobiotics	Drug - Neurological	54762	LC/MS Pos Early	100009390	3379	256.015		3878	3741	D00354	HMDB14695,HMDB05043																														60491100
2559	lanosterol	Lipid	Sterol	1128	LC/MS Pos Late	395	2687	409.383	79-63-0	246983	216175	C01724	HMDB01251	6586836	1015698	1416143	1292699	35255104		677644	573567	5566740	5441491	4585064		1121611	20028204	889770	8855354	9107620	3948730	1184012	2870971	2347083	5977505	1192549		1339597	7409859	3294140	4887212	6008005	8238781	598275	3953430	1977824		3967973	10235548
1172	laurate (12:0)	Lipid	Medium Chain Fatty Acid	1645	LC/MS Neg	181	5300	199.17	143-07-7	3893	3756	C02679	HMDB00638	58513900	197831616	155554112	216851056	711693824	42108488	14896611	16724608	53393192	1989768960	518190496	16145140	120483696	33571476	50963836	429348864	270627296	66113372	69008088	336373184	18742146	136311440	274228704	22345768	70389008	935989824	262111808	116915520	1858623232	2596580608	461705920	81075544	280634976	127611080	6386435072	44543984
257	leucine	Amino Acid	Leucine, Isoleucine and Valine Metabolism	60	LC/MS Pos Early	397	2864	132.102	61-90-5	6106	5880	C00123	HMDB00687	2498398976	1130699264	89723168	111079896	703063744	3694639104	353031424	15208866	1441461504	560929792	2514034688	19657978	237311488	3244687360	2197321728	2919493120	2505645056	1669856384	1287745792	4685523456	2651247104	4398379520	3056266752	1217178496	2721345280	2830390016	3676256000	1413655424	2808559616	2798245376	736653184	2099329536	15881303	97874776	1825936768	2377216768
661	leucylalanine	Peptide	Dipeptide	40010	LC/MS Neg	100003179	2264	201.124	7298-84-2	259321	227625		HMDB28922	4508646	7762701	1496136	1249766	6099059	942515	8986136	1096138	12615762	17179844	19293912	1072092	1686395	1130993	600647	466534	512217	412989	332063	160770	719047	1564109		8312804	411578	276122	535624	521711	1042943	2373982	13656153	33606	1977438	4110021	372808
830	leucylglutamine*	Peptide	Dipeptide	48189	LC/MS Pos Early	100003183	2620	260.161		4305457	3511125		HMDB28927	17293628	14128267	8631530	5474655	18083320	706913	17072132	1024834	26022292	25266286	55033184	1711519	3345317	2062319	1696553	241483	988776	711107	899198	367108	1172391	3092141	1451832	12908019	427991	448204	979024	412708	966831	4287947	27261984	352277	2791239	6839478	390770	694882
666	leucylglycine	Peptide	Dipeptide	40045	LC/MS Pos Early	100003185	2778	189.123	686-50-0	79070	71402		HMDB28929	35716528	16317036	5524019	2446481	15147475	3500505	12391874	1237805	39702432	25693266	80951496	1005891	2958379	4602080	7394377	816713	3070274	1392628	3608658	1169365	5273887	6984067	5655438	18456732	1752150	4680718	4675996	3263763	5723206	8528232	34746092	1180547	2045296	6209158	1114108	4011163
3885	levulinate (4-oxovalerate)	Xenobiotics	Food Component/Plant	22177	LC/MS Pos Early	100000765	1433	99.0441	123-76-2	11579	11091		HMDB00720	1115597	895505	560075	666325		6734440		1865905	1190400	1172843	789459		645187	2347327	1623736	2522480	4633891	2876024	2947456	1476097	2124684	4527798	2403440	2489580	3244443	1667272	1640458	4746104	3112199	16031679	934529	2303994		420197	1986766	1440004
4379	lidocaine	Xenobiotics	Drug - Analgesics, Anesthetics	35661	LC/MS Pos Early	100001538	3250	235.18	137-58-6	3676	3548	D00358	HMDB14426		1932946	663771								878025						1327928		379080	76787					2408885	125132	182090	4342204								88258
1696	lignoceroyl ethanolamide (24:0)*	Lipid	Endocannabinoid	57535	LC/MS Pos Late	100015855	2445	412.415			21169187			2207845	464052	215667	370392	288875	3320366	327346		2194815	652034	922384		332010	853383		914589	2055365	2535318	491892	2019198	805957	4559529	1330277	1482157	666353	956867	2444542	1828353	5347304	785918	372811	1160541	90965	157110	702102	260606
1485	lignoceroylcarnitine (C24)*	Lipid	Fatty Acid Metabolism(Acyl Carnitine)	57515	LC/MS Pos Late	100015834	1603	512.467						4343110					2563943								5626594	125091	1660881	1134998	765206	920983	2179889	1447679	1830353	1032697	1150267	690436	524231	1384209	2130228	2318452	868290	221086	504060			1020926	544033
1374	linoleamide (18:2n6)	Lipid	Fatty Acid, Amide	32455	LC/MS Pos Late	1492	1580	280.263	3999-01-07	6435901	4940587			10063552	12969729	16576417	25310020	11875435	11238294	10524846	10323708	17844162	8232360	8305734	8243335	10794807	8781869	9845850	8442875	13259719	11910305	9625979	11805984	7697121	14509083	7699971	9658708	16005905	9645509	8859280	10137357	12373564	10554731	11233139	13673403	21002688	31584926	11295995	9572783
1227	linoleate (18:2n6)	Lipid	Polyunsaturated Fatty Acid (n3 and n6)	1105	LC/MS Neg	180	5535	279.233	60-33-3	5280450	4444105	C01595	HMDB00673	456826464	386181184	2081681152	1733619712	366599904	2033707264	822323840	104406952	6696062464	535288224	946828416	30569898	189352128	1779756800	538030400	1206402944	2069039488	1925016704	1357769600	1659445120	521739168	1970441856	134038264	3651278592	1262007296	2286488320	654316288	522715008	192093696	9191604224	1188276864	4021202688	3315066880	4338945024	6108449280	1323814656
1229	linolenate [alpha or gamma; (18:3n3 or 6)]	Lipid	Polyunsaturated Fatty Acid (n3 and n6)	34035	LC/MS Neg	100001337	5450	277.217		5280934	4444437	C06426	HMDB03073	18646250	34076592	482290400	15193802	33871404	191957216	15550838	7800173	277870944	83731536	110416640	1152673	5486727	71912512	134896896	102401744	122095072	340548480	93054728	52755904	41594344	300086432	11471216	28822334	52682248	156726768	20321808	18938596	18440314	1438217856	58932196	400676096	107206800	304192416	137523472	123134104
1691	linolenoyl ethanolamide	Lipid	Endocannabinoid	62746	LC/MS Pos Late	100020840	1488	322.274	57086-93-8	5283449	4446569		HMDB13624						3390795								1188283	460924		1759093		280862	565837		556544			323449			248129		3368840		378369
2378	linolenoyl-linolenoyl-glycerol (18:3/18:3) [1]*	Lipid	Diacylglycerol	54951	LC/MS Pos Late	100010932	2229	630.509					HMDB07278																		1866464	142115			387704								3443042		766589		584078	1599791
2379	linolenoyl-linolenoyl-glycerol (18:3/18:3) [2]*	Lipid	Diacylglycerol	54952	LC/MS Pos Late	100010933	2268	630.509					HMDB07278			1852438						470432	349688				179508				2763924	500896		345416	580401							444761	5131173		984600	361548	3295280	2069072
1690	linoleoyl ethanolamide	Lipid	Endocannabinoid	52608	LC/MS Neg	100006726	6150	322.275	68171-52-8	5283446	4446566		HMDB12252	937757	5107876	943909	1948636	695800	81014336	1604536	588687	9792279	1616050	3953114		892277	45390832	17234202	2405252	8085849	8395429	2442110	3294430	1929776	16879960	340119	3968990	1597155	6684897	7679651	2877569	1765162	112440616	1416269	10104721	121010	1809245	965522	8232922
2376	linoleoyl-linolenoyl-glycerol (18:2/18:3) [1]*	Lipid	Diacylglycerol	54963	LC/MS Pos Late	100010926	2426	632.525					HMDB07249						977616			363270		381752			1536782		356289		2002554	1276836		584469	428002		627684		764406	645441		845398	49130516	305016	7298218		373533	1469085	302132
2377	linoleoyl-linolenoyl-glycerol (18:2/18:3) [2]*	Lipid	Diacylglycerol	54964	LC/MS Pos Late	100010927	2478	632.525					HMDB07250	447777	1430065	1012061	350418	1067525	1175650			4649501	2198919	1479764			2417322		1379931	210974	2165185	3640902		2146555	1279528		1402738	366961	1239969	226847		3044251	61572880	1116643	9209564	147376	2056472	1199821	482109
2374	linoleoyl-linoleoyl-glycerol (18:2/18:2) [1]*	Lipid	Diacylglycerol	54968	LC/MS Pos Late	100010941	2720	634.541					HMDB07248	5181892	5521741	10444047	4212675	1337124	15570076	2356734		16771112	2144247	2947514		585754	33721272		3493978	5109039	14868925	30970812	4699643	26362360	7208166	1370261	398925568		29262256	1190660	3826050	4309359	739039680	12430703	63569960		25303064	11083249	3849918
2375	linoleoyl-linoleoyl-glycerol (18:2/18:2) [2]*	Lipid	Diacylglycerol	54969	LC/MS Pos Late	100010942	2790	634.541					HMDB07248	1715603	2252504	8256275	2326700	1230572	2470151			20580148		1080908			5020452		544298		3036741	11145708	773336	10980624			74738648		5531631		590114		106820928	2983092	13349804		16715955	1321278	407137
1456	linoleoylcarnitine (C18:2)*	Lipid	Fatty Acid Metabolism(Acyl Carnitine)	46223	LC/MS Pos Late	100003151	1430	424.342	36816-10-1	6450015	4952667		HMDB06469						5834039								199575			4334305		564639		338352			1420748		248933				1923233		113480			280434
1508	linoleoylcholine*	Lipid	Fatty Acid Metabolism (Acyl Choline)	57463	LC/MS Pos Late	100015760	1388	366.337																						261400	208071												220179		312376
2780	lithocholate	Lipid	Secondary Bile Acid Metabolism	1483	LC/MS Neg	405	5372	375.29	434-13-9	9903	9519	C03990	HMDB00761	1021953792	462188736	133719088	355591616	350968224	1100956416	198906144	259498192	455457952	1497125760	993559488	88428224	661119104	1211192832	234818640	516716352	1891423872	229865376	642801728	595243392	581416128	1685621888	450307840	1025638720	902879232	2298098176	657619264	1730973952	1660182272	433761440	505263904	522114272	91276400	221551056	556346624	221017552
2782	lithocholate sulfate (1)	Lipid	Secondary Bile Acid Metabolism	62526	LC/MS Neg	100020823	4811	227.12											6967260								1205517							3683160	81237		2456073		944618				3303758	2805156
2783	lithocholic acid sulfate (2)	Lipid	Secondary Bile Acid Metabolism	62527	LC/MS Neg	100020824	5028	227.12														106703		3222462			581385	527883						25571956		124546	3683921			41578		451462	7233331					75721
4656	loratadine	Xenobiotics	Drug - Respiratory	38643	LC/MS Pos Late	100002800	1031	383.152	79794-75-5	3957	3820	D00364	HMDB05000																	31823324
91	lysine	Amino Acid	Lysine Metabolism	1301	LC/MS Pos Early	407	2850	147.113	56-87-1	5962	5747	C00047	HMDB00182	1624908800	587219456	56520124	61966136	360937888	2129362944	186892784	20126834	689651264	469323232	1593890304	14353201	140310800	1038642496	1266152960	1322986624	1383417984	613605056	903899520	2527164928	1512596224	2551882240	2149244416	820708736	1619818624	1604549376	1500983808	655882816	1063595392	1228644608	837351808	1280537216	19075624	96900256	861286848	1276325376
685	lysylleucine	Peptide	Dipeptide	40020	LC/MS Pos Early	100003196	3370	260.197	7369-79-1	4682588	3870665		HMDB28955	24573676	9403977	3274244	2760742	13725121	3421119	30626544	1325426	57481208	40673684	34286180	1158952	3235820	2475376		656680	1903543				824891			20475412	852219	871798	2027723	1176906		18089588	14588775	326334	2492623	8325724		353977
140	m-tyramine	Amino Acid	Tyrosine Metabolism	39581	LC/MS Pos Early	100002797	2701	138.091	588-05-6	11492	11008		HMDB04989	1248515	648982	292827	164958	2018169	1875897	208309		1318032	195434	910064		3248298	2898089	829252		3781132	3128262	1437334	8710721	2807364	12691015	1163358	630914	2423134	726848	8282795	868390	3226619	1492844	606759	1680171	62963	503747	2016649
1133	malate	Energy	TCA Cycle	1303	LC/MS Neg	409	615.6	133.014	6915-15-7	525	510	C00149	HMDB00156	7505578	3000111		4115881		443177056		2597654	10057439	2807413	3282626			532439040	46420612	99334000	101035040	163510704	75416032	236332624	93397568	238277600	156559632	14876999	128535288	107158448	51290608	74672424	63136760	12656210	22945442	170255328		2915732	104898552	110610800
1319	maleate	Lipid	Fatty Acid, Dicarboxylate	20676	LC/MS Polar	100000707	2640	115.004	110-16-7	444266	392248	C01384	HMDB00176	1278488	1922453	1908616	1398669	1281099	8157610	640728	799109	3563638	3764670	2419389	1643517	1163272	5482972	1322000	2713821	3778465	3342383	1810082	4628613	3157839	2716133	1867683	1749864	3971329	1410247	1485702	3633736	2504598	3891171	2312625	3686547	1364419	2574762	4039180	1917604
1150	malonate	Lipid	Fatty Acid Synthesis	15872	LC/MS Polar	818	3447	103.004	141-82-2;26522-22-85-0	867	844	C00383	HMDB00691	13319810	8035381	5146987	4701150	10046459	41142984	7259309	3380668	120585608	5181789	19241884	3136909	6910852	60881604	13826144	19865312	13726435	18980144	12315308	146301440	7005303	52062488	8783305	54293524	22252880	307156480	51189612	9152268	23877274	85814664	15305557	23169030	4419276	4543158	6167370	16768832
1149	malonylcarnitine	Lipid	Fatty Acid Synthesis	37059	LC/MS Pos Early	100001526	2086	248.113	853728-01-5	22833583	21403153		HMDB02095	1664018	322679			870518	2766063	270286	266933			1536119			4639373	833417	1936910	978747	2183948	653912	2073711	2234541	3010566	1502956	1408600	2614025	931784	1847756	1043701	1218518	1903210	1591175	968996			879577	746870
999	maltose	Carbohydrate	Glycogen Metabolism	15586	LC/MS Polar	913	3329.4	387.114	6363-53-7	10991489	388469	C00208	HMDB00163	3734465	2259385	1524672	1198723	851582	39856436	3791938		15884902	12197890	6051125	1445360	799997	271398176	11006499	3293003	15598868	6984579	151986128	1503443	24246438	19011182	897078	19509668	11938876	12001647	2132697	8030104	12345323	25111114	25059184	381048608	222313	3025346	2133450	5578549
1044	mannitol/sorbitol	Carbohydrate	Fructose, Mannose and Galactose Metabolism	46142	LC/MS Polar	100001740	2320	181.072		5780	440	C00794	HMDB00247	3013276	2626460	2674084	1611805	3347491	7686720	3004214	1598126	3533925	2938206	3761421	1551769	1964960	25759244	4339832	2030538	3300362	7013337	5700296	20792404	3403160	10806491	3023238	8603208	9485365	2814664	5831828	2666307	3571328	11297970	3037729	22569804	1452138	1340629	3200516	4142896
1045	mannose	Carbohydrate	Fructose, Mannose and Galactose Metabolism	48153	LC/MS Polar	803	2200	225.062	3458-28-4	18950	141983	C00159	HMDB00169	2064610	1556880	215832	652911	640446	39931644	1000039		1818741	833243	3764811		133457	54764448	21143682	484587	3522134	4401945	10751523	2478708	11532367	16326571	2775320	3195464	3627218	16922184		5227213	3834826	10509169	6361016	14355306		785309	2971257	5309854
1183	margarate (17:0)	Lipid	Long Chain Fatty Acid	1121	LC/MS Neg	891	5731	269.249	506-12-7	10465	10033		HMDB02259	1056003328	271165504	216914000	315025472	104691472	142426592	88994816	21120240	383214304	935550720	1298561152	41665084	446065184	220314688	60549976	1540732032	175504272	443446304	146307504	1145450368	30995674	141448336	225048928	87062472	440952096	101848304	1608989184	201100688	114708784	73429232	95430056	414861152	134147064	87215472	459697760	459411488
1486	margaroylcarnitine (C17)*	Lipid	Fatty Acid Metabolism(Acyl Carnitine)	57512	LC/MS Pos Late	100004054	1424	414.358	106182-29-0		35015987		HMDB06210						12490490								4901271	366187	529216	2122845	1821774	1763825	1358758	2693818	1416775	758261	4951737	534454	4505040	1649181	1764270	2936603	5875168		866010			1253865	669986
1238	mead acid (20:3n9)	Lipid	Polyunsaturated Fatty Acid (n3 and n6)	35174	LC/MS Neg	100001472	5650	305.249	20590-32-3	5312531	4471956		HMDB10378	3992523	6579611	2075244	2198214	1372900	85157832		4704884	32629110	468591	11343523	1087620		13440419	10255216	6721016	4036715		1378574	2300112	3117604	3284272	826647	6791728	462804	9953036	5378594	5159784	3643723	17544584	5480088	1197030	2563794		394327	3202221
4551	metformin	Xenobiotics	Drug - Metabolic	38306	LC/MS Pos Early	100002405	2817	130.109	1115-70-4	4091	3949	C07151	HMDB01921														8641963008
327	methionine	Amino Acid	Methionine, Cysteine, SAM and Taurine Metabolism	1302	LC/MS Pos Early	415	2526	150.058	63-68-3	6137	5907	C00073	HMDB00696	1036185472	269420448	97138632	100326976	335518144	1745342080	228326592	87328648	590758592	317773632	1060990400	85789168	130292216	1645190272	1098477440	1307224192	1159531008	737939840	626827968	2036225152	1301622400	2733901824	1636216960	769453440	1096493568	1206828032	1775588736	627990272	1150114432	1521539072	438882560	848588224	88022608	109363968	695418176	1094116864
331	methionine sulfone	Amino Acid	Methionine, Cysteine, SAM and Taurine Metabolism	44878	LC/MS Pos Early	100004635	1250	182.048	820-10-0	69961	63154			84678	607422	77356						327060	309415			83942		292241	883729	288992	624681		1503117		806251	3427260			337096	1316078	453406	516089	913157	188758	229030		181582	251246	520186
332	methionine sulfoxide	Amino Acid	Methionine, Cysteine, SAM and Taurine Metabolism	18374	LC/MS Pos Early	100000039	1272	166.053	3226-65-1	158980	139840	C02989	HMDB02005	316364000	173006752	13542753	18748584	34496748	453457760	15891980	7797038	157844576	66572464	224639616	2314409	20128414	227591712	128546888	140556864	354744352	137927824	93387352	473526912	256548352	284087840	287752512	90918168	210510912	206944864	273645376	156005200	264748592	352178528	92132624	252299504	1156811	18086862	234493824	152822128
4055	methyl indole-3-acetate	Xenobiotics	Food Component/Plant	1584	LC/MS Pos Early	1104	3380	190.086	1912-33-0	74706	67279		HMDB29738	127399	97779			69880	4105137			144250	330077	101335			3492337	512507	788210	233928	646062	159036	1261422	1127143	573506	429398		597189	309413	542833	432253	4101171	275729		1160770			479265	167917
1408	methylmalonate (MMA)	Lipid	Fatty Acid Metabolism (also BCAA Metabolism)	1496	LC/MS Polar	418	3078.4	117.019	516-05-2	487	473	C02170	HMDB00202	64306824	17485946	4384402	2694089	9349260	94877712	11402720	601894	40030272	67323328	4139012	1141616	361865	43255672	7828457	41317540	87497440	3184038	30591544	11561340	8400841	21081216	55032688	10134918	108148992	15159308	14630495	2767889	135677952	136419968	17663834	68537096	561159	6621610	613078	4260621
3534	methylphosphate	Nucleotide	Purine and Pyrimidine Metabolism	37070	LC/MS Pos Early	100001805	544	113	7023-27-0	13130	12578		HMDB61711	5368222	6682200	2557291	530272	1978258	101119848	214588	221896	86901696	109389680	20512116	85347	185556	224740880	50698372	52870508	36865580	95355136	35022972	65612036	53030260	47712352	60252008	82159176	133126792	100742904	16725428	12523393	3166510	49157848	89611784	67526776		3408771	111142976	23177062
308	methylsuccinate	Amino Acid	Leucine, Isoleucine and Valine Metabolism	15745	LC/MS Polar	2051	2800	131.035	498-21-5	10349	9922		HMDB01844	81849408	24704332	22190976	10574576	248706416	1038534720	37224588	1387082	280358336	51092452	428403552	14399507	7732593	218713280	377234144	478979104	510038112	62818648	386541152	1001773248	29112832	335935680	96260472	212135552	98923232	282597696	567949312	368605088	91336344	676384960	435616704	116090736	22529336	26387488	178472112	70198800
4500	metoprolol	Xenobiotics	Drug - Cardiovascular	18037	LC/MS Pos Late	2028	760	268.191	56392-17-7	4171	4027	D02358	HMDB01932																			476704192
4501	metoprolol acid metabolite*	Xenobiotics	Drug - Cardiovascular	34109	LC/MS Pos Early	100001385	2950	268.154	56392-14-4	62936	56653																					22174262		69578216
2548	mevalonate	Lipid	Mevalonate Metabolism	39583	LC/MS Polar	30	1462	147.066	96949-03-0	439230	388367	C02104	HMDB00227						14701493	299725		2903062					17528496	2455958	425318	682253	1109903	598239		969620	3310661	1524744	17629048	856150	1628447	2807747	1331359	844894	4846702		1210297			431279	229116
1707	myo-inositol	Lipid	Inositol Metabolism	1124	LC/MS Polar	363	3506.3	225.062	87-89-8	892	10239179	C00137	HMDB00211	1136759	1092709	235332	486411	341051	16495622	294461		3131189	1180160	2447558		376076	12624652	2599545	2377206	20728256	12282019	10648428	8119364	12657203	3724532	2171168	2898997	17334406	12463529	5065486	6282827	1763302	2515683	1367913	29502452			1801776	81383176
1175	myristate (14:0)	Lipid	Long Chain Fatty Acid	1365	LC/MS Neg	519	5440	227.202	544-63-8	11005	10539	C06424	HMDB00806	522644960	802219776	1229080960	413944576	651300416	412682752	114418896	98583200	1004877440	4798518784	4562182144	30403576	199951920	327756480	309348832	3855776256	758752704	605618240	269168800	1093383296	87039680	515666016	975465472	108531344	544976128	1545590400	1263910272	571822208	601018880	1715805568	589790272	715689600	446239200	298990112	4341770752	453868832
1176	myristoleate (14:1n5)	Lipid	Long Chain Fatty Acid	32418	LC/MS Neg	100001198	5346.9	225.186	544-64-9	5281119	4444564	C08322	HMDB02000	5341531	17676932	9799673	16113675	3100620	49755016	1009415	3646243	16012966	127557744	26038488	2038702	4189411	17205662	6343256	16921340	25178658	7858412	11178070	4264259	17815718	12541901	7800679	9450771	7173915	33340636	7026285	20596004	6536135	84845696	7576967	9339782	4103542	3015524	27556128	8723968
1461	myristoleoylcarnitine (C14:1)*	Lipid	Fatty Acid Metabolism(Acyl Carnitine)	48182	LC/MS Pos Late	100006051	1316	370.295	889848-55-9	90659872	34999520					97433	80407	75859			68148													69937		67110	296942						892878	572189		83647	103320	344018
1451	myristoylcarnitine (C14)	Lipid	Fatty Acid Metabolism(Acyl Carnitine)	33952	LC/MS Pos Late	100001270	1350	372.311	18822-89-4	6426854	4932274		HMDB05066						2118724																				530517				3816006
413	N('1)-acetylspermidine	Amino Acid	Polyamine Metabolism	57689	LC/MS Pos Early	187	3075	188.176	14278-49-0	496	482	C00612	HMDB01276	16208861	4153715	2494618	1408223	7659245	49076428	15703095	367033	60454520	17299716	30187690	1234383	985927	320313888	131510800	3255665	51090172	1820236	79464312	33241414	21818830	645960192	35113624	657338304	13101741	179449792	1960971	67596976	12037702	229461888	112401520	68002744	436996	11176072	11672680	48861176
417	N(1)-acetylspermine	Amino Acid	Polyamine Metabolism	32360	LC/MS Pos Early	1200	3356	245.234	77928-70-2	916	892	C02567	HMDB01186	160741			180346	121765	1776104	45571		2510097	357218	476650			556716	558909							2103196	165122	5954152		2150589		706387		1326203	1890909
115	N,N,N-trimethyl-5-aminovalerate	Amino Acid	Lysine Metabolism	57687	LC/MS Pos Early	100015962	2186	160.133			34236878			1027584256	489701984	8537980	57791872	20407676	944665792	59716148	16712585	839034048	410275840	112175432	12116004	12889035	3032743168	429584256	2454744576	1256792832	558941312	718338176	4838676480	1230180224	1954602112	2227781120	1460931840	445592608	1775249280	2542017792	2338763008	1325893632	827402816	2025967616	253776896	11427455	327541952	370312576	83639352
2427	N-(2-hydroxypalmitoyl)-sphingosine (d18:1/16:0(2OH))	Lipid	Ceramides	57697	LC/MS Pos Late	100015642	2692	554.514	34839-02-6		30786072			2610060	1109684	2039973	921417	2610275	15122898	834225	366745		554870	3200267	3947113	2918238	50178812	6211556	29930018	16158414	86586920	9702170	23856128	3776341	8563498	5999492	13980250	2032585	5378535	11274043	6464457	7612965	13689380	11893168	20808696		2930426	7533461	7879423
70	N-acetyl-1-methylhistidine*	Amino Acid	Histidine Metabolism	43255	LC/MS Pos Early	100004299	2100	212.103		193270				914958	271423	1108698			13477401	530464				1167528	562851		13963084	963947		3354605	305145	3448492	719791		1283894	2224361	11460821				2237417	573978	3423669	608212				5391379	525052
69	N-acetyl-3-methylhistidine*	Amino Acid	Histidine Metabolism	43256	LC/MS Pos Early	100002204	2056	212.103	37841-04-6	193270	19993498			8467426	2060395	763004		459883	619495	1967492	282888	9284627		832400	524584	1309924	554674	1320510		3873154	2713463		2833039		2841348	3217278	1452893		2731996	7920903	2496717	131221		2744785	923450		264083	1996853	1057011
3499	N-acetyl-beta-alanine	Nucleotide	Pyrimidine Metabolism, Uracil containing	37432	LC/MS Neg	100002102	773	130.051	3025-95-4	76406	68881	C01073		3420797	12778451	5911731	7764882	12112930	611115	21702212	2271874	12878175	16851382	15079776	7979775	10013095	1243212	572049		1264188		505421	266839	424346	1035109	233641	520220	211460	680760	289679	123289	246861	742014	9846005		10500028	6958102	424946	197799
1105	N-acetyl-beta-glucosaminylamine	Carbohydrate	Aminosugar Metabolism	35469	LC/MS Neg	1216	759	219.099	4229-38-3	439454	388560	C01239	HMDB01104	4825442	2083907	478262	164233	1729937	1121769	2518084	236118	6299996	3829542	9704958		190009	1104329	2610772	535056	707437	771140	700889	453295	1394659	1171830	3140141	1411158	762191	1768638	1297929	911637	1527176	1845590	4196209	1520546	273109	876686	932174	1077866
113	N-acetyl-cadaverine	Amino Acid	Lysine Metabolism	43530	LC/MS Pos Early	100002249	2385	145.134	32343-73-0	189087			HMDB02284	401721536	90385472	19341294	319389504	902608	690797888	52934640	12593549	1932276096	304148800	21924178	1041260		3213672448	383733696	1947953	575565888	2879526	43063724	541943168	528256032	183010512	345496608	603724928	30409052	1401700480	103690200	1873738368	1137970	648016768	232033280	17471436		848379	2935709	35995716
410	N-acetyl-isoputreanine*	Amino Acid	Polyamine Metabolism	62309	LC/MS Polar	100020487	2904	201.124						3835826	684804		115904	703517	4840197	403248		3234013	1040606	3813706			3414018	1890709	693932	3983274	447915	631397	3292638	3069928	6403681	3158513	2287860	1666595	4945014	7704313	1848654	2062456	1870291	1429989	1479191			615561	2869480
30	N-acetylalanine	Amino Acid	Alanine and Aspartate Metabolism	1585	LC/MS Neg	1110	861.2	130.051	97-69-8	88064	79449	C02847	HMDB00766	1183418	420164	59144	232133	316295	2412928	116227		271052	187514	1521501		274530	870830	1644670	872374	2437803	870352	432418	2418574	824056	3790010	1721526	1868375	632896	1349828	2832968	1881228	1581970	2943069	1178043	997322			630449	884115
380	N-acetylarginine	Amino Acid	Urea cycle; Arginine and Proline Metabolism	33953	LC/MS Pos Early	100001266	2245	217.13	155-84-0	67427	60752	C02562	HMDB04620	1729624	2873861	681911	753220	3890126	2338350	2509545		12875244	6410730	2151337		1172713	12169185	5695718	1871837	4662376	3946776	4718544	9478624	4719360	25303096	5711795	4171860	3233127	2895713	3499013	4817826	3497326	4177204	7392406	5673710	369633	2206416	5176469	5409740
39	N-acetylasparagine	Amino Acid	Alanine and Aspartate Metabolism	33942	LC/MS Pos Early	100001257	785	175.071	4033-40-3	99715	90090		HMDB06028	1902816					6241282		154975	1210844					7876041	2762147	5784265	4905495	9862047	2423858	12472326	4598339	10424033	7934980	5354179	4757944	6665020	12337113	6220936	4254892	5148865		2577361			2565344	3595007
35	N-acetylaspartate (NAA)	Amino Acid	Alanine and Aspartate Metabolism	22185	LC/MS Pos Early	100000787	880	176.055	997-55-7;997-55-7	65065	58576	C01042	HMDB00812	27071894	14280740	3077119	975255	5544967	38121168	10733877	2904754	22621956	48152992	24829268	3395509	5158046	44936376	5504927	15372019	37577768	10040904	18995106	29634544	3922622	17253506	4994856	10732346	15580185	5821650	23055808	5241364	5109078	4133004	64483904	23086494	3752070	7830221	3134575	31856928
381	N-acetylcitrulline	Amino Acid	Urea cycle; Arginine and Proline Metabolism	48434	LC/MS Pos Early	100001577	1010	218.114	33965-42-3	656979	571213	C15532	HMDB00856	1784002					1562372					3218544			1084465	522325	19986396	4909217	7871617	1899964	6518651	890767	6040711	1439806	3648820	15945031	5568023	7845195		7289677			17599960			677530	18464072
346	N-acetylcysteine	Amino Acid	Methionine, Cysteine, SAM and Taurine Metabolism	1586	LC/MS Pos Early	1107	1416	164.038	616-91-1	12035	11540	C06809	HMDB01890	385274	107961			167326	646845			436251	253816	519537			878922	178770	213010	694496	482035	333650	699051	641395	525966	458297	1596749	367720	817778	256531		159255	272903	779399			403729	240408	234892
1117	N-acetylglucosamine/N-acetylgalactosamine	Carbohydrate	Aminosugar Metabolism	46539	LC/MS Pos Early	100006435	715	222.097		24139			HMDB00215	146621792	93070112	27990096	45639484	24641240	632008768	42533416	12195888	125731912	60212932	198161968	6802324	8921080	856134528	226054576	320018592	328500000	589446656	667331648	231268896	513362752	566323392	175196432	225870656	213318272	781966016	122577288	125356328	579283392	361039200	72207808	1341341952	2410526	15172178	308067104	618819008
1114	N-acetylglucosaminylasparagine	Carbohydrate	Aminosugar Metabolism	48149	LC/MS Pos Early	1215	1212	336.14	2776-93-4	123826	21403014	C04540	HMDB00489	1032088	847986		142086	384071	6950825	256473		987655	1234555	2664731		302537	3213038	1425636	1235935	470092	1551810	502787	2690506	1457997	1936846	500422	1905058	705379	1452380	1096794	392681	3114796	2166965		1289743			577092	398965
44	N-acetylglutamate	Amino Acid	Glutamate Metabolism	15720	LC/MS Pos Early	100000282	1050	190.071	5817-08-03	70914	1266066	C00624	HMDB01138	44940848	65186796	14265380	7761377	59284144	47423288	24319860	4101894	67739352	93073808	112809456	2310305	26570928	58228008	25967848	184858768	81285448	148327248	40210096	128125456	35772044	122691792	61214348	9150163	86649784	82921608	98299384	34743304	131660040	16403156	89621968	98511872	8913848	50898820	122574768	66936692
45	N-acetylglutamine	Amino Acid	Glutamate Metabolism	33943	LC/MS Polar	100001253	2140	187.072	2490-97-3	182230	158492	C02716	HMDB06029	6943801	2433986	420227	744210	4220424	7795220	2302570		6142625	4739762	10033401	75463	1028109	5264328	3407114	5305866	30561534	8672167	3843005	10428595	9760504	11591588	5214971	2446424	9870647	5199901	8121098	6333637	42409712	14623350	6274969	3574986	379567	1715974	4241652	462034
2	N-acetylglycine	Amino Acid	Glycine, Serine and Threonine Metabolism	27710	LC/MS Neg	100001006	731	116.035	543-24-8	10972	10507		HMDB00532	547545	462783				802248		195917	233462		1181835	456320	138496	590389	317238	1011087	694557	669006	109104	2872228	223117	402270	582273	383590	475182	699665	2446491	411866	507839	1452850	359973	515316		251117	280887	439572
89	N-acetylhistamine	Amino Acid	Histidine Metabolism	48679	LC/MS Pos Early	100006123	2287	154.097	673-49-4	69602	62805	C05135	HMDB13253						90930552		597525	1518444416		4400068			1841300096	15918120		28394934		3741877		18756916	484658016	33929024	145409744	3692585	79592080	5815429	375462016		49655036	33258978	1149707				1657118
68	N-acetylhistidine	Amino Acid	Histidine Metabolism	33946	LC/MS Pos Early	100001293	2065	198.087	39145-52-3	75619	68142	C02997	HMDB32055	4213834	3418151	1044679	811567	2752041	16840192	3543886	139636	5506353	5224408	7110623	129089	1768848	10767843	9963586	3588936	14127451	4296766	4782001	8990101	7450379	16299299	10911947	12835895	6087361	6455176	18647128	4943423	4793693	5914233	5591212	6644496	188700	2029303	5182449	14912167
294	N-acetylisoleucine	Amino Acid	Leucine, Isoleucine and Valine Metabolism	33967	LC/MS Neg	100001276	2325	172.098	3077-46-1	2802421	2081100		HMDB61684	1479294	218493	57014	74466	587683	1171674	123601	23224	187360	193036	2505560		237215	1143051	2477550	2999193	1882463	1683220	265676	12067806	2717291	3193768	2267440	1729608	3013722	3724732	7786792	390188	5229733	2331776	160181	3866587		54605	1100579	2730805
258	N-acetylleucine	Amino Acid	Leucine, Isoleucine and Valine Metabolism	1587	LC/MS Neg	1082	2400	172.098	1188-21-2	70912	64075	C02710	HMDB11756	3181904	424366	93563	158807	886340	2938227	104365		382828	220374	3850247		265353	1511640	3167112	3556591	2405608	1656746	629386	15728096	3301506	5636652	2478972	2550402	3866561	6010868	9144177	441962	5929303	2603943	219679	5033309		79812	1441207	2975875
328	N-acetylmethionine	Amino Acid	Methionine, Cysteine, SAM and Taurine Metabolism	1589	LC/MS Neg	1083	1787	190.054	65-82-7	448580	395338	C02712	HMDB11745	2237394	138411	40539	30996	458565	4767243	270708		958304	464186	1968401		75341	4856997	2293393	5168005	7479039	2436887	1253192	17555812	1654036	8455597	2460965	6306681	5146474	5505786	19911876	862916	4134199	4910198	549163	5580925		81004	923048	7081792
333	N-acetylmethionine sulfoxide	Amino Acid	Methionine, Cysteine, SAM and Taurine Metabolism	45428	LC/MS Pos Early	100005463	880	208.064	108646-71-5	193368	167798			6197216	2751276	1012987	731269	1340717	14564400	817495	117598	4165081	2616793	5084624	105211	656114	10694685	6703418	6961592	19813032	9337580	3857848	34132948	5538232	11379383	6650521	8394557	10845533	13129004	36292776	2940662	10146312	18062300	2159112	23861448		920133	5696201	19063640
1106	N-acetylmuramate	Carbohydrate	Aminosugar Metabolism	18354	LC/MS Neg	100000283	860	292.104	10597-89-4	5462244	74681	C02713	HMDB60493	5354004	4246292	1212684	485133	1164331	27740210	2794959	23810	17462048	6660602	19043930	405137	977583	166527456	7128282	10320274		7778425	20357804	25108146	5222615	24648460	8301304	4261913	49014744	43357708	484784	8467379	12633045	23759788	2530988	41177904	97223	359523	3634734	59853752
1103	N-acetylneuraminate	Carbohydrate	Aminosugar Metabolism	32377	LC/MS Pos Early	1162	660	310.113	131-48-6	439197	10292217	C00270	HMDB00230	36877344	31661644	10622834	29903264	33440382	119337904	16173680	5867652	74431472	45328336	123887112	1966914	6366212	78344064	28677784	108431400	9232949	35038500	96993024	21244484	94057072	23255188	19430730	39340208	4184060	88732936	18945104	4886260	94159208	117367784	16321516	337311360	859766	5454963	78584280	38793676
117	N-acetylphenylalanine	Amino Acid	Phenylalanine Metabolism	33950	LC/MS Neg	100001256	2597	206.082	2018-61-3	74839	67404	C03519	HMDB00512	2355748	582554	132839	215252	752443	4736130	93036		616694	501388	3265384		279004	1816055	3269637	2336650	4370252	2039322	435078	14372933	1035233	5364111	1687276	2243140	2780754	3149989	9913105	1372914	7365364	4185877	464052	4315886		216963	2520879	2712678
382	N-acetylproline	Amino Acid	Urea cycle; Arginine and Proline Metabolism	34387	LC/MS Pos Early	100001334	1695	158.081	1074-79-9	322640	285677			41939692	7477782	1839128	658980	11815869	99996736	2688053	327985	9466796	4417025	31339384	754691	1784691	15546228	9945145	8112142	45213244	14234118	85630672	34216316	16806832	88651856	6457352	25137836	57008080	7609420	14579318	57408592	16732618	24668162	14839482	36215280	1309585	5359904	14837724	16199548
420	N-acetylputrescine	Amino Acid	Polyamine Metabolism	37496	LC/MS Pos Early	192	2230	131.118	18233-70-0	122356	109095	C02714	HMDB02064	10662027	3571009	1464103	712220	4476930	255855872	1844263	164069	40774800	478390	2481652	274456	435362	811924352	24719848	9628140	11240707	9557682	6869921	49375532	1601313	27380040	4736600	193924640	6473334	138291392	12765423	8138702	496052	392475488	4970713	7925871		625812	1463881	7699991
4201	N-acetylpyrraline	Xenobiotics	Food Component/Plant	48438	LC/MS Neg	100006120	2545	295.13											1259597			112302		23495			1127006	135137		2777884	51079	28491					154708	412356	168881	54256			317467		47616				74488
10	N-acetylserine	Amino Acid	Glycine, Serine and Threonine Metabolism	37076	LC/MS Polar	100001851	2000	146.046	97-14-3	65249	58744		HMDB02931	21770408	10029715	1993620	2681628	5231501	15750399	2374813	680210	7844821	33760420	18399060	721700	11259670	22680038	9570150	18291848	9734057	24951932	7261238	65233056	9148081	18188624	16491505	60147320	85008800	13877079	27095368	56437168	232548208	94696528	3763727	17244902	880977	2031555	33724116	13054254
232	N-acetylserotonin	Amino Acid	Tryptophan Metabolism	1500	LC/MS Pos Early	193	1975	219.113	1210-83-9	903	879	C00978	HMDB01238	2492322	401122	561847	188114	607957	396657	505272	122415	1626717	2720567	689929	226843	638812	155892		3467929	502837	3559200	354465	1176929	805795	1283788	1140691	553304	1608275	544698	369741	381567	323194	341824	564856	121994	219245	717223	458561	131880
2534	N-acetylsphingosine	Lipid	Sphingosines	17772	LC/MS Neg	1302	6000	340.286	3102-57-6	5497136	4593710	C00195	HMDB04950			115773	45066828		755679		647783	1278648			858349		3221639	308706		282382	438645				2684446	443634	8198472		168612	90974	76511		343073	403852				172497
359	N-acetyltaurine	Amino Acid	Methionine, Cysteine, SAM and Taurine Metabolism	48187	LC/MS Neg	100005466	800	166.018		159864	140553			67959					12685249								6251746	2266267		91173		103804			2197302		4666682		15252749	228450	23732		8177434		816638
17	N-acetylthreonine	Amino Acid	Glycine, Serine and Threonine Metabolism	33939	LC/MS Polar	100001274	1700	160.062	17093-74-2	152204	3841173			21046190	4978435		1216193		55829872		257573	9925594	6547734				78048424	41099860	17710340	56474396	26294760	17533612	51617348	20507280	68176096	19086752	91060328	26751334	37667004	79304360	14348288	108521432	54172784	11295461	20947860		2494111	12061531	19679926
208	N-acetyltryptophan	Amino Acid	Tryptophan Metabolism	33959	LC/MS Neg	100001254	2630	245.093	1218-34-4	700653	610602	C03137	HMDB13713	1039676	114885	77468		158953	878392	54638		297733	177028	417834			1268839	283285	281318	1981527	492691	165329	891289	537355	584097	694787	674986	396452	479101	707133	448408	772775	769556	202274	215455		115342	432796	191957
133	N-acetyltyrosine	Amino Acid	Tyrosine Metabolism	32390	LC/MS Neg	100001104	1680	222.077	537-55-3	68310	61606		HMDB00866	852741	364400	69848	129132	277804	754210	123056		787623	441415	1087445		252239	806666	807084	1572152	1230287	1340609	135897	6320245	395505	3126982	1056180	1214599	871060	2339088	4711266	350043	2494922	1720979	264061	1976440		146243	744009	1387309
315	N-acetylvaline	Amino Acid	Leucine, Isoleucine and Valine Metabolism	1591	LC/MS Neg	1084	1704	158.082	96-81-1	66789	60154		HMDB11757	1296132	263984			407996	3007287	78484		254644	68189	1628479			4405782	1805144	1454734	2677920	907791	1084112	5174201	804386	2614403	1197932	6147177	1537310	4828596	3211803	762047	1734370	1323391	328203	1869053			722921	1277813
384	N-alpha-acetylornithine	Amino Acid	Urea cycle; Arginine and Proline Metabolism	32984	LC/MS Pos Early	100000285	2000	175.108	6205-08-09	439232	388369	C00437	HMDB03357	4559799	15249728	4713298	2413580	3160800	26834044	3920842	387843	6120146	11244505	15811980	1260105	2732507	47721244	18491616	18492732	25485554	20365164	27908642	10478393	20826930	59876864	34889048	11857859	17246084	26096404	23053032	14848650	16516597	21677200	9305170	31772856	632307	6834640	46438924	25998328
33	N-carbamoylalanine	Amino Acid	Alanine and Aspartate Metabolism	52340	LC/MS Pos Early	100006369	950	133.061	77340-50-2	426409	377278						183421	182607	247843			662775		277221				492958	421806		213124	854847	711622		349205	233517			1333948	1483682	265401	860392	302683	333001				235097	435399
3464	N-carbamoylaspartate	Nucleotide	Pyrimidine Metabolism, Orotate containing	1594	LC/MS Neg	1108	606.9	175.036	923-37-5	93072	4573859	C00438	HMDB00828	2215719	564631	23043	39518		1966049				181289			102087	230337	439166	5165182	2014621	940305		11855870	579086		1492334		5544159	357734	22080484		385944			1257812			227050	5792353
405	N-carbamoylsarcosine	Amino Acid	Creatine Metabolism	38696	LC/MS Pos Early	100002606	920	133.061	30565-25-4	439375	388495	C01043	HMDB12265	301461					387867	146043		296846		1473817		149175		247059	750281	1218427	860736	671855			329243	97005		6323598	374170	737543	315460	1100084		224791	1873593			472617	1890462
383	N-delta-acetylornithine	Amino Acid	Urea cycle; Arginine and Proline Metabolism	43249	LC/MS Polar	100004523	2719.9	173.093		9920500	8096135			1082442	347984			396364	5425845			1965224	568289	631309		284510	15396135	2750241	1773908	2574206	1533117	2383388	5595357	2974295	12064073	2636053	2772694	2436223	3692167	17754138	2174386	1048350	6936219	1908011	4160211			3331238	1980374
224	N-formylanthranilic acid	Amino Acid	Tryptophan Metabolism	43549	LC/MS Neg	100004561	2150	164.035	3342-77-6	101399	91624	C05653	HMDB04089	293937	64214	59475		40249	358299			161216	30821	184789			1193600	173527	452171	498261	153604	105269	591477	168209	1396549	290809	289762	185657	294858	1021948	153000	170036	270208	116622	86909		108337	687323	118533
329	N-formylmethionine	Amino Acid	Methionine, Cysteine, SAM and Taurine Metabolism	2829	LC/MS Neg	194	1543.8	176.039	4289-98-9	439750	388809	C03145	HMDB01015	790921	45196			117287	3051050	56841		389983	153661	381292			2587994	1647139	1404839	873054	1101124	360601	1331240	780321	2212466	2030049	1406009	611044	904652	1511737	406830	792084	2753937	341925	606196			531994	448240
187	N-formylphenylalanine	Amino Acid	Tyrosine Metabolism	48433	LC/MS Neg	100006056	2360	192.067	13200-85-6	759256	663938			365383	282738	51313	128157	189675	1535913	67978		338813	406712	205681	39300	193356	751785	401531	1421209	1465685	1002438	205811	1188439	577856	970789	726733	380135	296345	641079	718803	734041	1709650	857284	305438	523887		194174	1064638	487263
4064	N-glycolylneuraminate	Xenobiotics	Food Component/Plant	37123	LC/MS Pos Early	100001491	636	326.108	1113-83-3	123802	3794850	C03410	HMDB00833	51175					1837278								3558631	386530	83401	248521	223801	320950		914401	1066143	346519	529470		271195	260369	378599	273806	628658	131619	104553			174598
56	N-methyl-GABA	Amino Acid	Glutamate Metabolism	39577	LC/MS Pos Early	100003152	2109	118.086	1119-48-8	70703	63869	C15987		5247022			1792469	2172689	4597051				1702054	7036509		1290065	10409554	2980102	5909011	10209871	1699970	3671970	11893543	12728848	29793780	6381578	588942	14330707	2429624		18992812	20529356	12257689	1649603	4108814				2169765
31	N-methylalanine	Amino Acid	Alanine and Aspartate Metabolism	37069	LC/MS Pos Early	100001823	1536	104.071	600-21-5	5288725	4450824	C02721	HMDB01906	20030608		1775115	2711002	235405	5730628	1273475		4264995	1837221	1362195	1042627		4698008	1871817	3739170	20548952	2080612	3865774	5514442	3678928	2748519	5051325	1454921	3560672	12598040	1672324	13622405	1727157	1006528	1771092	11625541		1663198	2429716	4005015
46	N-methylglutamate	Amino Acid	Glutamate Metabolism	31532	LC/MS Polar	100001131	2900	160.062	35989-16-3	439377	388497	C01046		1540761	1114365	656482		615850	3787401	658126		4560722	1954054	1146445		459956	6378136	1969887	10532560	1214728	6112173	1878127	7907477	4785624	14938465	1975424	933817	3175794	2261618	2516424	2548190	3201045	3409813	1995388	5214753		1459376	2351090	3965714
404	N-methylhydantoin	Amino Acid	Creatine Metabolism	40006	LC/MS Neg	100002557	1425	113.036	616-04-6	69217	62430	C02565	HMDB03646	147177						105974		131221				59620	401590	371873	157325	222305	100568			98806	3245287	90473	10271759		80194	173444	448790	80144	2209333	123628	143079			259877	146395
387	N-methylhydroxyproline**	Amino Acid	Urea cycle; Arginine and Proline Metabolism	62068	LC/MS Pos Early	100020215	1145	146.081						815505	3531398	2299836	3053848	3521924	10516904	4713760	1173451	7477079	4308323	3486945	2809443	3723639	6652550	2873977		864721				871153	13754393	599593	5754351		19009308		3590099	1795784	14010178	10364911	534263	3954451	2914451
260	N-methylleucine	Amino Acid	Leucine, Isoleucine and Valine Metabolism	35666	LC/MS Pos Early	100001581	2787	146.118	66866-69-1	2777993	2058259							970823	3071098			528823		596878			719223		988857	883222	2237881	752313	4021100	1395503	7072715	526034		1530340		1424646	716168	3798218	1168722	374876	674631		247672	1174431	458106
119	N-methylphenylalanine	Amino Acid	Phenylalanine Metabolism	42999	LC/MS Pos Early	100004042	2790	180.102	2566-30-5	4657542	3846742				750265	584356	701872	392280	1919324	696050	147083	880700	1567168		66168	111937		458740	514191	3149469	11270140	1403810	11411220		9472099	8798971	660118		2485122	22447234	1180293		956326	2134204	6131570	111427	3828852	13432351	551881
393	N-methylproline	Amino Acid	Urea cycle; Arginine and Proline Metabolism	37431	LC/MS Pos Early	100001956	1335	130.086	475-11-6	557	541			20503696	14532930	1664977	10895534	8745273	53109984	3697470		73792120	10186999	6235704	1028259	1023718	469794720	18514404	5368797	35189024	14000183	11715786	10758306	45899108	234476272	30650886	22278464	42872992	126786960	8653772	81127872	51335416	59737440	63018188	12912239	745136	2481888	29144696	17140312
360	N-methyltaurine	Amino Acid	Methionine, Cysteine, SAM and Taurine Metabolism	42989	LC/MS Polar	100004056	1650	138.023	107-68-6	7882	7594							1136723	307512			771146	681214	1553858			2991166			848988	1392462		2672488		3263271	310835	1975892		366669	327622	217038		383316		464865			612443
395	N-monomethylarginine	Amino Acid	Urea cycle; Arginine and Proline Metabolism	43586	LC/MS Pos Early	100004488	2845	189.135	53308-83-1	132862	117259	C03884	HMDB29416	1082892					2541897					1270141			4011675	2335172		3021197	1545585	1840023			3719017	385184	1015985		1034982	2197507				456465	3262515			862140	1075921
2430	N-oleoyl-sphingosine (d18:1/18:1)*	Lipid	Ceramides	19385	LC/MS Pos Late	100000631	2848	564.535	5966-28-9	5283563	4446676		HMDB04948	3725358	1482708	339768	2284835	170062	126583528		1190735	12510383		2363457			39947616	3520349	1187320	29824292	25692660	2584819	2469758	3684245	17401524	4119009	38372012	317963	18576774	4519236	13216233	4891665	20651870	33175870	2554328		2445059	13951342	1555321
1684	N-oleoyltaurine	Lipid	Endocannabinoid	39732	LC/MS Neg	100003119	5610	388.253	52514-04-2	6437033	4941625								570989																		105780		495501				1074973
2418	N-palmitoyl-sphinganine (d18:0/16:0)	Lipid	Dihydroceramides	52604	LC/MS Pos Late	100009028	3090	540.535	5966-29-0	5283572	4446685		HMDB11760	23769974	3902952	2887586	44287496	11151397	68184184	1627581	3392564	26707510	3514898	10765556	4072465	2988621	47490480	6468762	10369848	41653320	207354576	39523120	39196744	27872848	24939860	30207540	24954096	7249927	34511340	18228368	36767152	18873664	44970312	26740872	20716516	1063501	1640356	14511798	18218572
2426	N-palmitoyl-sphingosine (d18:1/16:0)	Lipid	Ceramides	44877	LC/MS Pos Late	1518	2893	538.519	24696-26-2	5283564	4446677		HMDB04949	42418384	3649264	5023001	12650898	4306573	280698912	1532989	2806825	19494912	5333542	18333124	4140503	5134186	126277776	16386499	86584712	79583832	130996640	79354080	40451272	56639836	93093920	26183330	104924520	4239982	61602968	70924472	33643164	60043984	155293936	42468320	38116048	712997	3359861	30864206	15209832
1426	N-palmitoylglycine	Lipid	Fatty Acid Metabolism(Acyl Glycine)	42092	LC/MS Neg	100003686	5580	312.254	2441-41-0	151008	133100		HMDB13034	841202			7203784	259015	827989		104248			1801863			321760	81505	506453	643891	471875	60657	1417858	979639	107786	188183	177039	243163	1002783	829923	293069	376235	465022	187920	270562				245054
1686	N-palmitoyltaurine	Lipid	Endocannabinoid	39835	LC/MS Neg	100003239	5560	362.237	83982-06-3		14435932								649649																				1282535				844558
1111	N-propionyl-D-glucosamine	Carbohydrate	Aminosugar Metabolism	40501	LC/MS Pos Early	100003689	851	236.113	15475-14-6		24589961								10384152					1140701			4959138	2356323	1884536	6774457	2763971	4079141	1051642	2175562	4024164	2139203	2222990	2883705	5571811	1735720	3744452	2946837	3477174		6043689			3272058	9694891
32	N-propionylalanine	Amino Acid	Alanine and Aspartate Metabolism	42993	LC/MS Neg	100004113	1335	144.067	98632-97-4	321155	284272			471143					1157860			66710		845579			555223	525071	87489	1453135			1064685	237286	1967700	1142518	881041	248358	1043691	1787676	2613336	528685	1660858	215833	422053				462956
4833	N-propionylmethionine	Xenobiotics	Chemical	43506	LC/MS Neg	100004125	2290	204.07	52811-70-8	103692	93617			490537					3512643			227663		535314			1010601	1321404	1624108	4823109	186826	366252	5019319	1594661	2406750	1501610	2199375	1839384	2855794	7449635	430678	2075636	715465	80321	1547465			253106	2520958
2419	N-stearoyl-sphinganine (d18:0/18:0)*	Lipid	Dihydroceramides	1759	LC/MS Pos Late	922	3526	568.566	2304-80-5	5283573	4446686			3923606	1845785	690242	14834226	1497738	9922605	256856	897480	4231118		2511575	721085	233972	14671671	1863810	1063354	10804628	56565868	2076881	6117801	1499276	5476922	18810940	8275900	896651	9842318	4514948	15205211	1307577	5146307	11939583	5639945	240197	1325053	6216097	3782961
2429	N-stearoyl-sphingosine (d18:1/18:0)*	Lipid	Ceramides	54979	LC/MS Pos Late	1547	3392	566.551	104404-17-3	5283565	4446678		HMDB04950	1439038	1143272	748397	3799358	628101	34268752	762951	1485164	3258938		1660463	1633360	816351	31783240	14084755		16173872	26614530	4025587	2984113	12450793	11910525	11144257	37200352	165302	9362289	17784192	8489522	2009940	10930306	21675516	3009370		2026455	4509674	1942930
1685	N-stearoyltaurine	Lipid	Endocannabinoid	39730	LC/MS Neg	100003240	5782	390.268	63155-80-6	168274	147194								149820								100564												340449				140305
418	N1,N12-diacetylspermine	Amino Acid	Polyamine Metabolism	52987	LC/MS Pos Early	100002132	3105	287.244	61345-83-3	132680	117134	C03413	HMDB02172	244232	191824	173516		247012	71957008	580098	149752	8740114	444801	1102677			9966798	11788847		1613788	164318	2870030	140191		96897912	1239712	140332064		100105672		6391714	178417	36347684	12714498	2221284		589506		1008543
3572	N1-Methyl-2-pyridone-5-carboxamide	Cofactors and Vitamins	Nicotinate and Nicotinamide Metabolism	40469	LC/MS Neg	100001468	1668	151.051	701-44-0	69698	62899	C05842	HMDB04193		273461		132056		1564056			1768429					769158	1361596						747353	2191931	269756	1543938		1012963		20275		2242588	333335	106829			52994
3417	N1-methyladenosine	Nucleotide	Purine Metabolism, Adenine containing	15650	LC/MS Pos Early	1242	2120	282.12	15763-06-1	27476	4573813	C02494	HMDB03331		367128	332851	446312		1710869	468902		834290	158963				4523228	1024622			2147335	236095	1421349	993385	1395571	5936631	1168266		1001659	167269	1030930		2471148	313055	348746			675693
3393	N1-methylinosine	Nucleotide	Purine Metabolism, (Hypo)Xanthine/Inosine containing	48351	LC/MS Pos Early	100001409	1430	283.104	20245-33-4	65095	513976		HMDB02721	268292			154981		824912								483875	1853436		656689	587540	693127		413141	485628		215100	614942	1295497		317630		1499125	73568	757776			542503
92	N2-acetyllysine	Amino Acid	Lysine Metabolism	36751	LC/MS Neg	100001721	828.3	187.109	1946-82-3	92907	83869	C12989	HMDB00446	735898	122892			94067	1954964			557451	215337	599956			1877034	497508	1657562	2186213	885425	601314	4673367	1778309	3834006	1348439	2127016	956556	1692231	2719219	761575	1772151	2189934	936128	1150668			944915	998799
98	N6,N6,N6-trimethyllysine	Amino Acid	Lysine Metabolism	1498	LC/MS Pos Early	189	2825	189.16	23284-33-5	440120	140379	C03793	HMDB01325	25220068	4647312	418229	690099	3527534	330369024	2255212		7438833	1859627	12802632	857374	774637	3959965	10902049	19953882	31395936	7510723	10139296	33090340	17468048	28834890	24171080	29027422	25577540	57806856	16187535	42041508	9908763	202457248	37236608	22466268	324362	550582	15612430	15545337
93	N6-acetyllysine	Amino Acid	Lysine Metabolism	36752	LC/MS Polar	100001734	2612.6	187.109	692-04-6	92832	83801	C02727	HMDB00206	1834474	422224			495266	2455871	262480		2238190	1076965	1432824		110048	3242163	1389060	2014563	3770519	1949718	1208403	3575193	2965509	9486615	2691340	3009419	1798344	2821326	4932651	1815446	2415561	4852449	1889760	1741042		156935	1491580	1602189
97	N6-carboxyethyllysine	Amino Acid	Lysine Metabolism	37458	LC/MS Polar	100001769	4124	217.119	5746-03-02		11312319			568976					6182857			906507					886830	261011		373854	532167		529592	319519	557351	342037	909381	545138	545090	408089	264803		1320859	162739	103259			139993	216037
1118	N6-carboxymethyllysine	Carbohydrate	Advanced Glycation End-product	36713	LC/MS Pos Early	100001768	2500	205.118	5746-04-03	123800	11217184			2517829					82503640			2446009				313618	10165794	2041470	1424313	2574968	3317114	860461	4446684	1964238	4378825	4807810	2318092	1969705	2749655	1716111	2535383	872165	1427770	1891057	1860391		174408	8704314	1587338
3425	N6-dimethylallyladenine	Nucleotide	Purine Metabolism, Adenine containing	22120	LC/MS Pos Late	100000770	687	204.124	2365-40-4	92180	83222	C04083							637140			90352					789306	264027		66124	237698	258176		143409	974255				290047		270250		358074	33635				176056
3418	N6-methyladenosine	Nucleotide	Purine Metabolism, Adenine containing	37114	LC/MS Pos Early	213	2264	282.12	1867-73-8	1869	92307		HMDB04044	1055304	2680815	165175	289041	485292	1705699	190755		1726368	3817269	1929818		467176	515230	1738322	406977	1486756	1129115	1812591	2006574	2954967	1079778	650276	308444	678379	362765	696975	3475631	1296302	5185480	1417882	1682820		888618	4187320	1153249
3436	N6-succinyladenosine	Nucleotide	Purine Metabolism, Adenine containing	48130	LC/MS Pos Early	100001664	1930	384.115	4542-23-8	165243			HMDB00912										364550				540630				1240485		650130							130278					767054		147315
1697	nervonoyl ethanolamide (24:1)*	Lipid	Endocannabinoid	57536	LC/MS Pos Late	100015857	2153	410.399			21169186			648842					983940												324963	150516	162713	80162	401420	278492	120628		199800	506168	315901	254547		85027
1487	nervonoylcarnitine (C24:1)*	Lipid	Fatty Acid Metabolism(Acyl Carnitine)	57531	LC/MS Pos Late	100015846	1602	510.452						11170450					7037744			733645		171223			9118850	247640	4284866		1620021	1565015	2277574	1959452	1439450	1774805	1297613	3443806	996493	1602111	3355424	1392896	2467711	1058559					541732
4066	nicotianamine	Xenobiotics	Food Component/Plant	43026	LC/MS Pos Early	100004035	1800	304.15	34441-14-0	9882882	8058557	C05324		254528	1836389	452441	151946	2011837	173094144	2735425		4789506	3371480	1945835		381792	6734544	1407825	1891593	1397060	3595373	1705634	13617456	532478	23807878	1244168	6909507	846366	2328111	1614539	1374314	4156389	5598464	9061389	1952625		1586135	3050813	3018436
3553	nicotinamide	Cofactors and Vitamins	Nicotinate and Nicotinamide Metabolism	594	LC/MS Pos Early	432	1942	123.055	98-92-0	936	911	C00153	HMDB01406	2469320	670138	770428	881500		1929437	325441	920829	1142151	676457	1396401	734965	409944	2239781	837050	2031043	2488793	1252487	2106920	2103537	1708495	1115741	2357000	3939965	3218091	1744107	1232636	2664918	2082956	1837412	1244647	1284922		1380482	3517717	706360
3556	nicotinamide riboside	Cofactors and Vitamins	Nicotinate and Nicotinamide Metabolism	33013	LC/MS Pos Early	100001310	2040	255.098	1341-23-7	439924		C03150	HMDB00855	5544408	3172939	1791053	641890	919008	636636	4587079	137972	4667675	12255247	10298301	205397	645079	32081508	9734963	1359477	2921166	747385	7449054	10541758	8808808	939659	9033220	29023510	2568278	22226188	390465	17721356	2643489	30805116	4442939	912190		1758859	17135232	2078006
3550	nicotinate	Cofactors and Vitamins	Nicotinate and Nicotinamide Metabolism	1504	LC/MS Pos Early	567	1673	124.039	59-67-6	938	913	C00253	HMDB01488	62027932	66779136	37722936	11900230	68641896	912557888	142321376	12768428	329793184	217918864	191839104	19394452	30739408	1523276672	219348240	173590048	324998784	186627040	372863904	233234240	156402976	957868480	189148896	697219968	193979296	769444736	104310304	436820832	85174736	291889824	355293088	300040448	5679705	115739272	201386144	281025024
3551	nicotinate ribonucleoside	Cofactors and Vitamins	Nicotinate and Nicotinamide Metabolism	33471	LC/MS Pos Early	100001316	1536	256.082	2625-49-2	161234	141635	C05841	HMDB06809	4451005	713352			5369084	14321279	787716		22289674	2024050	2880888	357794	434181	8030012	1295492	5959983	11929369	5880144	2016053	7771846	2497751	96307096	2966792	286858080	7153957	4027738	15212086	6904218	2938393	36004616	31140634	30646834	164887	7419390	18156640	6513809
1195	nonadecanoate (19:0)	Lipid	Long Chain Fatty Acid	1356	LC/MS Neg	892	6068	297.28	646-30-0	12591	12071	C16535	HMDB00772	15543603	41391596	25909642	41299904	15701093	9641299	4124232	3651488	31843858	106206176	82448800	3181509	24387072	21385752	9139221	110658808	5342218	34312088	9114824	39056632	3322904	15905396	29931266	16818950	11553707	8458012	51727496	11174934	6448591	8621825	11171430	26554986	10520273	16118591	29620812	20330164
371	norvaline	Amino Acid	Urea cycle; Arginine and Proline Metabolism	37426	LC/MS Pos Early	100002082	2582	118.086	760-78-1	824	801	C01826	HMDB13716	40722616		3631472	3800531	1779294	20605224	2419893	3485455	5915016	3031784	14660818	3299408	3859082		65620212	12766287	29587684		13612713	31600480	25271400	71261624		28752268	19236348	100825296		10852570	24509614	56967892	7873132	35456480	3216330	3469850	21143144	18146108
4749	O-sulfo-L-tyrosine	Xenobiotics	Chemical	45413	LC/MS Neg	100005384	990	260.023		514186	448617			34022				84760	4312254			69168		101831			758670	90271	145346	39983	202536	31294	486573			179827	67610	26106	170977	315260		19700	631368	68753	185240				90795
175	o-Tyrosine	Amino Acid	Tyrosine Metabolism	43392	LC/MS Pos Early	100004290	2772	182.081	2370-61-8	91482	82607		HMDB06050	2478771	1229420	308919	288323		1010569	404335		7148685	490944	2905491		676926	3074175	3210216	3171347	3289734	612145		3881396	2948205	5467743	2930869	3477988	2323690	3981557	2589925	1873046	311308	727581	183315			236366		949838
1285	OAHSA (18:1/OH-18:0)	Lipid	Fatty Acid Hydroxyl Fatty Acid	57389	LC/MS Pos Late	100015654	3384	582.546								5609128			5663220			1890354		525613		631412	229512		3433350	2654853	1804115		1150196		2131261		2982317	316165	2645095				869225	2258281	184672		3046428	14610633	627839
1339	octadecadienedioate (C18:2-DC)*	Lipid	Fatty Acid, Dicarboxylate	61860	LC/MS Neg	100019982	4676	309.207						67840					270670								68244	818924						103406			275613						280601	103134	75850
1337	octadecanedioate (C18-DC)	Lipid	Fatty Acid, Dicarboxylate	36754	LC/MS Neg	100001615	5043	313.238	871-70-5	70095	63283		HMDB00782	1871156	9477821	556331	3394147	8369679	1509870	1199582	451392	309523	664054	18709678	547030	4479725	2001419	714564	6237836	7952924	23967276	7873299	9412070	2384557	7135729	861270	1599324	20840604	2340414	4299704	6097247	1102580	3119678	1124698	9894126	641355	812147	7747948	7634631
1338	octadecenedioate (C18:1-DC)*	Lipid	Fatty Acid, Dicarboxylate	61861	LC/MS Neg	100019978	4875	311.223						173776	2601451		2490784	82869	2398281			33702		257293	666613	1471894	477167	1057619	239005	796196	510776	221542	338065	2242106	432992	60221	2305049		444676	176517	1168344	521655	709820	455339	170340			183295	568292
1380	oleamide	Lipid	Fatty Acid, Amide	32458	LC/MS Pos Late	1504	1677	282.279	301-02-0	5283387	4446508	C19670	HMDB02117	102348352	120119904	143092304	144456112	115259312	127044112	111987544	126836176	134954864	88636752	90681208	96598176	114839432	99191408	98962152	96708440	137475664	123902088	116406056	104499944	91254376	134097304	93412240	127143088	100612296	105896848	94421944	109549232	119193648	139708848	110759952	118180040	167203296	140452304	149870736	102392576
4070	oleanolate	Xenobiotics	Food Component/Plant	38286	LC/MS Neg	100002313	5563	455.353	508-02-1	10494	10062	C17148	HMDB02364	3418006			2232268	1512140		1084397		54731644	2538483	6370149			15619395	354239	6080153		191785440	1883954	10763575	3394243	4365126	96683	57490	10808461	3129353	4311238	383031	3771399	693792	2603238	35600304	3449772		7607040	5209207
1188	oleate/vaccenate (18:1)	Lipid	Long Chain Fatty Acid	52285	LC/MS Neg	100008930	5655	281.249						2100110336	2366016512	7065713664	6468217344	804874944	9668452352	694314624	322370816	5578908160	4097309952	4625193984	126632736	2028938240	3643783680	2252182784	8523890176	9266610176	6656364032	2183289344	7922489344	1803770752	7905732096	1254986752	3060253440	5393641472	4022878464	4733247488	4011648256	2332775424	13886160896	6743238144	9117166592	6420286976	8673989632	23234818048	7572507648
1672	oleoyl ethanolamide	Lipid	Endocannabinoid	38102	LC/MS Pos Late	1137	1661	326.305	11-58-0;111-58-0	5283454	4446574		HMDB02088	2445644	953926				102993200	585998		3730455		1249645			11431227	5332997	1128510	6844034	3367087	2110740	1952461	2896319	7296160	530942	10262202	2820860	7021232	2695143	3723865	2408030	91853984	2668282	5322759		555892	2868853	2316530
2369	oleoyl-linoleoyl-glycerol (18:1/18:2) [1]	Lipid	Diacylglycerol	46798	LC/MS Pos Late	100002989	3115	636.556	106292-55-1		23975985		HMDB07219	1293687	556660	4376052	647216		4669962	308878		5247401	905431				8363145		1527482	6511157	2129548	5993250	1093274	4199344	2003196		26550938		8824824	393685	2210262	819676	316441376	7372391	13054561		4712332	9058569	689853
2370	oleoyl-linoleoyl-glycerol (18:1/18:2) [2]	Lipid	Diacylglycerol	46799	LC/MS Pos Late	100002990	3223	636.556	104346-53-4		29788004		HMDB07219	6920919	3295567	41990104	7928366	1441237	10239491	1272935		65925112	11181633	2891700		557571	20196936		1912543	13754323	3398460	19418296	2672919	12690105	5717168	717638	47045512	115985	16881760	2408947	6885785	2565423	438865760	17590684	24126296		22610624	10120264	1893257
2366	oleoyl-oleoyl-glycerol (18:1/18:1) [1]*	Lipid	Diacylglycerol	54945	LC/MS Pos Late	100010918	3571	638.572					HMDB07218			1210863			5909877								2466155			2052420					3036333				455073		339436		121210392	4693962				3726012
2367	oleoyl-oleoyl-glycerol (18:1/18:1) [2]*	Lipid	Diacylglycerol	54946	LC/MS Pos Late	100010919	3695	638.572					HMDB07218	1068493	393615	15447770	3905717		13034445			15031292	2713526				7640773			5035864		1988641		3005979	6002877				2957888		5608223		196285008	13728593	1767710		3724998	5286043	1275747
1459	oleoylcarnitine (C18:1)	Lipid	Fatty Acid Metabolism(Acyl Carnitine)	35160	LC/MS Pos Late	100001501	1423	426.358	38677-66-6	6441392	21403150		HMDB05065						92135168								1861546	1569036		23386480	1588287	3608360		1735232			16396270	3075780	8860980		1527612	559453	18131234		1778978			2573736
1505	oleoylcholine	Lipid	Fatty Acid Metabolism (Acyl Choline)	53260	LC/MS Pos Late	100009331	1449	368.352											444205											291567	326132				86962			118885					275893		246919			151515
369	ornithine	Amino Acid	Urea cycle; Arginine and Proline Metabolism	1493	LC/MS Pos Early	444	2800	133.097	3184-13-2	6262	6026	C00077	HMDB03374	109855472	94207632	10203552	13265570	5064113	201575824	18607924	3030790	25413468	29525638	96679432	4831173	15108128	271976672	263962896	96703984	133656480	37856992	99562976	99486632	144082272	305297312	221516144	36810688	182925824	140497408	175054656	50572588	45336608	218218464	59671632	190873232	1288352	17591196	101986552	219365120
3466	orotate	Nucleotide	Pyrimidine Metabolism, Orotate containing	1505	LC/MS Polar	445	1638.1	155.01	50887-69-9	967	942	C00295	HMDB00226	306411008	27928906	8272523	12585649	29921560	623570688	14522307	2133079	128180536	37033600	140581696	3823825	8283408	1034914368	293136000	1388270592	739434432	273813952	230860512	2250771456	494932992	1365999616	709147840	5429879	1012418112	893399936	1136543360	177161312	251201056	25792722	34840992	1114608128	1489390	13349345	653056000	1260859264
3596	oxalate (ethanedioate)	Cofactors and Vitamins	Ascorbate and Aldarate Metabolism	20694	LC/MS Neg	100000841	603	88.988	144-62-7	971	946	C00209	HMDB02329	4048726	1487842	8205296	6783309	3416786	7340187	13193531	4911642	3621564	2324479	1181755	846289	523693	8176216	6587351	2139774	4976776	1155932	4754446	1305514	3544247	3759518	2689645	2985172	31443184	3041148	2984258	4275138	3918725	2681462	7377177	11669505	1563032	18866434	2896719	11734823
3757	p-cresol	Xenobiotics	Benzoate Metabolism	33444	LC/MS Neg	100001018	4154	107.05	106-44-5	2879	13839082	C01468	HMDB01858	3020205	11586525	11665525	24626222	13049244	476756	3720779	1366356	4124778	75679272	39585476	4476482	32644056	239083	81750	208523	1375107		522900	3685711	1419076	195121	3279815	477281	3708547	441293	7114407	719211	3385533	225754	6902160	938529	6892008	16962966	514230	182782
3758	p-cresol sulfate	Xenobiotics	Benzoate Metabolism	36103	LC/MS Neg	100001315	2890	187.007	3233-57-7	4615423	3806480		HMDB11635	572517		38310	67430	2972393	3477317	42852	35609		41676	1618020			1524287	432022	1105583	1069680	1338244	841564	1830059	377563	2196241	1694579	488790	849859	753419	3195843	345454	846747	272924	3130043	807835		311498	1828970	311286
3726	p-hydroxybenzaldehyde	Xenobiotics	Benzoate Metabolism	17665	LC/MS Neg	1276	2040	121.029	123-08-0	126	123	C00633	HMDB11718	2669056	2657789	666427	3217803	1002544	10482793	529047		5083689	2278622	2205442		475754	5731221	1113457	13610583	962141	5420756	781235	12645607	2384500	8443083	1072000	324672	3755605	1343814	9413022	919768	8754878	1664343	1504495	4207955	319245	357892	907404	1203642
1283	PAHSA (16:0/OH-18:0)	Lipid	Fatty Acid Hydroxyl Fatty Acid	52622	LC/MS Polar	100009050	705	537.489						2309837		906310		371130	4659588			3102801	648426	710710		4604141			6005262	1018481	801186		524688				1806181		5065846	2699740			669519	1152465	219963		837286	1703224	323377
1381	palmitamide (16:0)	Lipid	Fatty Acid, Amide	42095	LC/MS Pos Late	100003915	1661	256.263	629-54-9	69421	62629		HMDB12273	24991076	35415936	32375360	32174106	28896118	21326552	26166274	26796816	27622740	23061410	25955814	21859612	31447380	18076462	19212722	19232168	27452762	23566256	20968980	24433248	18021384	25026008	19165408	20202152	23972472	21396380	20943218	21179092	22174100	18764184	25504546	21737924	34728152	25217152	20660298	22728946
1180	palmitate (16:0)	Lipid	Long Chain Fatty Acid	1336	LC/MS Neg	424	5618	255.233	57-10-3	985	960	C00249	HMDB00220	5596410880	4499429376	4129895936	6562497536	3801714432	6692361216	1250060544	2074865536	7398179840	12335160320	30491635712	619592768	3852738816	5079351808	4328888320	20632619008	6305418752	8672315392	4000047360	10060073984	1757724160	6572497408	7640632832	4852604928	6267319296	6496109056	10370803712	4929192448	3282394112	6941058048	5914816512	8643630080	2361810432	3103226112	13200806912	7404252160
1181	palmitoleate (16:1n7)	Lipid	Long Chain Fatty Acid	33447	LC/MS Neg	452	5475	253.217	373-49-9	445638	393216	C08362	HMDB03229	71182248	67960352	507559	49693644	31583708	644349504	50446680	23568452	494351328	169627712	353591424	6826832	20259786	391514304	96909776	286387456	1758770816	200022480	72192512	114003472	125883528	146539296	77498016	70376264	85956152	218130496	109822880	129468464	61589144	425138208	318703584	1072566144	45404800	106290440	371814784	192087040
2355	palmitoleoyl-linoleoyl-glycerol (16:1/18:2) [1]*	Lipid	Diacylglycerol	54967	LC/MS Pos Late	100010930	2664	608.525					HMDB07132	328317																2865847	642340	506990					1490308		687467				29686096	3152896	3981631		235423	1041971
1454	palmitoleoylcarnitine (C16:1)*	Lipid	Fatty Acid Metabolism(Acyl Carnitine)	53223	LC/MS Pos Late	100009406	1357	398.326		71464547	28639183								2343141											1497530		212265		179951	79757		1755158		445844				1927952	213160				294542
2499	palmitoyl dihydrosphingomyelin (d18:0/16:0)*	Lipid	Dihydrosphingomyelins	52434	LC/MS Pos Late	100008954	2290	705.591		9939965	8115586			2036699	509401	475603	1687909	539063	4744558		418966	344391		2083470	856708	342733	19668822	1408118	6166472	3308030	2026217	11255633	4753658	4654214	3485896	570048	11573914		2109415	4597232	677901	9865996	7569248	2379248	2315271		297546	3512624	3787249
2503	palmitoyl sphingomyelin (d18:1/16:0)	Lipid	Sphingomyelins	37506	LC/MS Pos Late	100002107	2168	703.575	6254-89-3	9939941	8115562			3180942	1308800	1428356	3609426	1174195	13009069	505204	922648	1272484	624987	5203779	3157043	1519605	46785680	3433786	10362125	13745215	6176594	25217392	8531200	6488488	7080847	1745196	44342768	1260483	2306831	6436642	772133	17431724	10597609	1768306	4248711	218907	452122	2756275	9763912
2352	palmitoyl-linolenoyl-glycerol (16:0/18:3) [2]*	Lipid	Diacylglycerol	54965	LC/MS Pos Late	100010939	2834	608.525					HMDB07105		1171386	449764	147805	474523	296059			9679254	8433957	1526742			1517241				1012710	800018										593859	7755157		4623036		498379
2350	palmitoyl-linoleoyl-glycerol (16:0/18:2) [1]*	Lipid	Diacylglycerol	52633	LC/MS Pos Late	100009052	3080	610.541		9543695	7822645		HMDB07103	450513	773150	985084	237529		834192			2734519	1247606	245809			2021248		1127096		912767	1428888	251849	1172781			8602651		2392835		459618	536756	24191242	954969	3690533		1447218	864668
2351	palmitoyl-linoleoyl-glycerol (16:0/18:2) [2]*	Lipid	Diacylglycerol	52634	LC/MS Pos Late	100009055	3197	610.541					HMDB07103	6547688	4759838	10371992	3159767	1591609	2721116	940401		45994216	19273784	5075802		1380504	7235380		1573171	3575231	1747603	5484355	1501709	3974011	1053673		16276162		4913079	562805	2427390	1847479	33134156	3607884	8971160		8389663	1237132	415610
2349	palmitoyl-oleoyl-glycerol (16:0/18:1) [2]*	Lipid	Diacylglycerol	54942	LC/MS Pos Late	100010917	3695	612.556				C13861	HMDB07102			1816254	333421		1109417			4140453	1091040				1130118			708682		164226	122882						346656		571244		10224104	2137588	450559		616825
1453	palmitoylcarnitine (C16)	Lipid	Fatty Acid Metabolism(Acyl Carnitine)	44681	LC/MS Pos Late	100000776	1425	400.342	6865-14-1	461	448	C02990	HMDB00222						108337248								5634980	3034415		3959921	2055187	5909181	3844656	9500876	2959166	1485822	32716656	124043	8223710	3684328	2831078	14284272	92425000		1183834			2300941	2283618
1504	palmitoylcholine	Lipid	Fatty Acid Metabolism (Acyl Choline)	52944	LC/MS Pos Late	100009233	1482	342.337		151731	133731								1065930								137578	75495			649671	163151					281841		150690			102547	572857		568972			76412
3587	pantetheine	Cofactors and Vitamins	Pantothenate and CoA Metabolism	57555	LC/MS Pos Early	100001495	2056	279.137	496-65-1	439322	388453	C00831		287144					1021198	119998		912734	612527	371570			1263793	286179	220969	256572		461977		494903	698064	85953	6665329		203472		399615		422480	1007580	218898		267002	196799
3580	pantothenate	Cofactors and Vitamins	Pantothenate and CoA Metabolism	1508	LC/MS Pos Early	1024	1667	220.118	137-08-6	6613	6361	C00864	HMDB00210	125212104	74113728	27684668	8194686	76676856	187847312	107139288	4310529	319930912	214007312	147342496	7368620	16707907	1064144512	204615488	253379488	178598368	185657616	237310320	363756512	126348496	772248768	199309680	94998608	158323520	344727744	192064208	311179776	98547584	277196640	246074976	301272096	1794947	55015192	204463264	301405536
3777	paraxanthine	Xenobiotics	Xanthine Metabolism	18254	LC/MS Neg	100000453	2279	179.057	611-59-6	4687	4525	C13747	HMDB01860		99750	198634			2501736			58417	237725	208968			302624	895046		520742	245282	243239	111221	2612899	306149	170041	303429	238015	1199937	258376	265004		1504061	154981	530673		119973	2781170	303046
1168	pelargonate (9:0)	Lipid	Medium Chain Fatty Acid	12035	LC/MS Neg	437	4798	157.123	112-05-0	8158	4574394	C01601	HMDB00847	5841310	18821156	16880930	11940864	17567652	17146588	5144444	19155470	19348544	28893864	14413863	14770537	14511872	9802627	11761946	45408916	33931296	44617360	28657552	21122566	14502922	12445776	11116958	11070787	11727585	12545784	11126090	26334308	37219600	35856796	6332772	8396207	10707788	6255286	10512603	19912656
1179	pentadecanoate (15:0)	Lipid	Long Chain Fatty Acid	1361	LC/MS Neg	980	5521	241.217	1002-84-2;10002-84-2	13849	13249	C16537	HMDB00826	1418962432	349125600	195854080	187356880	485631520	646596224	194700560	59576400	878545536	732678976	3049497088	38024952	406622400	1335548288	118000720	2754813952	474868448	1261453184	351770592	2152067072	78322896	299605088	430298688	77410064	1295177088	252812576	1808107520	637257344	541478784	195394304	171166880	1007359168	365452256	490135104	849404416	930908224
4844	perfluorooctanesulfonate (PFOS)	Xenobiotics	Chemical	57564	LC/MS Polar	100010955	662	498.93	1763-23-1	74483	67068	C18142	HMDB59586		71471			1317961				108743		386768						279917	322560	3609635		261195				103715			3345672	6090691	643570			2836303			591026
125	phenethylamine	Amino Acid	Phenylalanine Metabolism	12142	LC/MS Pos Early	1207	3065	122.096	64-04-0	1001	13856352	C05332	HMDB02017	1376677	1014589	531621	813064	742740	754257	692202	390902	27485372	659788	3478284	429485	1008499	1203291		868316	975635	572516	2320239	1444204	1118445	570214	848949		22343576	1172477	5163833	689414	823319	28583936	1294971	956090	640528	835030	1284836	1027954
126	phenylacetate	Amino Acid	Phenylalanine Metabolism	57745	LC/MS Neg	100000011	2150	91.0554	103-82-2	999	10181341	C07086	HMDB00209	9151595	1470369	2033256	712060	2889371	5408415	654451	150864	1195618	6047356	13534769	157418	438242	4498856	2783967	9934718	45089844	5560523	10627662	20266276	7864002	10542350	9037986	1499966	22518094	17366680	14986040	6654840	17765044	6280024	3649930	4381548	545773	1893838	9272021	5301824
896	phenylacetylglutamate	Peptide	Acetylated Peptides	52925	LC/MS Polar	100009045	2325	264.088		11579826	9754592		HMDB59772	711722				1450099	406389			864791		1169969			762942		630224	650579	179454		2663300	371529	739580	191258	535951	716271	353227	1232150			761112					11854274
897	phenylacetylglutamine	Peptide	Acetylated Peptides	35126	LC/MS Neg	100001417	2330	263.104	28047-15-6	92258	270643	C04148	HMDB06344					2087388		100199				54769			68110	119807	21908	87907				22671		33067				41271			58766					420851
116	phenylalanine	Amino Acid	Phenylalanine Metabolism	64	LC/MS Pos Early	460	2878	166.086	63-91-2	6140	5910	C00079	HMDB00159	1598939008	787589440	86213200	105838664	473349952	2614461696	276739648	18506926	1294514688	520380672	1652440576	18640172	191296720	2199167488	1606534656	2050439296	1668902400	1184585088	856562688	3316357632	1898052992	3435296768	2304258560	1083323136	1587860608	1786618624	2744208128	932799744	1818681344	2107370880	651997248	1346342144	13450534	99967744	1147746176	1617926016
713	phenylalanylalanine	Peptide	Dipeptide	41374	LC/MS Pos Early	100003589	2909	237.123	3918-87-4	5488196	4589716			3897976	4875865	4153899	2076457	9699197	15992580	16650257	3284083	23472672	30546546	32157812	1617815	2458786	4655435	1784888	637206	858034	962293	637717	1255753	1324247	3100296	2810711	13942998	1167842	1074901	1092804	1645273	3235364	3128290	26756800	521558	4806305	7128190	729699	478351
717	phenylalanylglycine	Peptide	Dipeptide	41370	LC/MS Pos Early	100003588	2898	223.108	721-90-4	98207	88678		HMDB28995	12390534	9008021	2922563	1782021	7154761	1185283	5845998	705897	32370738	16476352	54332396	571173	981318	6480952	2647836	337705	835715	810560	736999	868617	1330856	3063082	2871140	9968773	676140	1561008	1153022	865123	2489372	3123226	21215076	449799	885599	2923436	402923	759126
122	phenyllactate (PLA)	Amino Acid	Phenylalanine Metabolism	22130	LC/MS Neg	100000774	2208	165.056	828-01-3	3848	3715	C05607	HMDB00779	4196597	3786104	335610		1505847	9353362	1227091		6282678	2087907	8324056		354040	68735256	697606	10673969	2961016	3202047	1499867	63042656	3030664	2906749	6465486	3578830	16017982	17368058	68511216	1918203	6039161	25754488	431908	10826279	468284	221226	2731353	8340294
3766	phenylpropionylglycine	Xenobiotics	Benzoate Metabolism	35434	LC/MS Neg	100001591	2945	206.082	56613-60-6	152323	134261		HMDB00860	119464	18477									109645			83714	56225		86522		32779	338376	21690	62751	131967		196028	480601	680064	22831	34025			90410			74054	186392
121	phenylpyruvate	Amino Acid	Phenylalanine Metabolism	566	LC/MS Neg	241	2515	163.04	156-06-9	997	972	C00166	HMDB00205	903059				115750	1660338			321823		225525			3312442	437929	3682392	151133	3600445	104295	2473842	752509	1067441	1092243	773339	760669	673425	2492832	195227	331690		95093	1201491			737323	623848
4076	pheophorbide A	Xenobiotics	Food Component/Plant	35879	LC/MS Pos Late	100001689	1562	593.276	15664-29-6	5323510		C18021		16695383		608456	1165852	2227252	26376348			542418	1315511	7405498		202289	2829975	216980	2667736	12362323	1571324	1030719	6755517	4144996	16993288	2271605	5410754	34214592	540411	2575025	2426146	408980	11545145	7977778	16458898	22081904	1285537	5268045	6701855
4077	pheophytin A	Xenobiotics	Food Component/Plant	61857	LC/MS Pos Late	100001827	3176	871.573	603-17-8			C05797		213883296	4718099	50070696	18806320	58400216	340582080	1580971	8294629	327598944	237556912	311521216	2832244	18912740	48093608	6213512	24761108	121079608	111430600	45074440	299006208	13938142	126639856	134945344	86242744	6725365	40368464	159358704	336440128	36398640	108975600	261919056	213483424	47161204	51226776	197782128	234235248
1147	phosphate	Energy	Oxidative Phosphorylation	42109	LC/MS Pos Early	461	576	98.9842	7664-38-2	1061	1032	C00009	HMDB01429	10644309	70290456	49976988	111958368	97811392	9479021	93649440	33613492	56304232	70357352	58182804	6104035	69216120	33133944	4572530	130709376	9841597	138864320	5318430	99988672	11484998	3554002	13608541	5672642	362253024	5777983	81621880	1400560	558089	2216811	39487112	41006624	17328740	118794728	20184932	56336616
4081	phytanate	Xenobiotics	Food Component/Plant	598	LC/MS Neg	466	5908	311.296	14721-66-5	26840	10140204	C01607	HMDB00801	11273874	22688708	3158262	12573190	4365539	14055602	858843	1114244	20389776	77446584	24511020	2234306	3838828	32046426	1782332	144964560	12817714	8713321	11672341	10761625	5428610	10353948	11632861	3128375	19477428	25610592	31221964	9592141	13037503	19158162	4381642	9183381	3003489	1963576	16084161	18930164
2415	phytosphingosine	Lipid	Sphingolipid Synthesis	1510	LC/MS Pos Late	469	1367	318.3	554-62-1	122121	21238683	C12144	HMDB04610	1718730					32919248					2764443			16666386	5356807	2342871	13228934	3419301	2277159	5475721	2971473	12720782	1207168	25115608	2475909	4544862	3527485	7012401	9192656	29247650		2476018			2497158	2084155
230	picolinate	Amino Acid	Tryptophan Metabolism	1512	LC/MS Pos Early	1022	910	124.039	98-98-6	1018	993	C10164	HMDB02243	1781481	1130557			500121	3086748	508318		1573907	860335	1712169			2260997	1684300	2239474	3609501	1671737	2899683	3355407	5999999	1678466	874434	927661	142474720	1402390	951604	2122433	3726338	2283524	5878345	2276293	8573774		2305672	444188
1320	pimelate (C7-DC)	Lipid	Fatty Acid, Dicarboxylate	15704	LC/MS Polar	100000101	2745	159.066	111-16-0	385	376	C02656	HMDB00857	66484064	1050401	586493		5039918	962501	2692706		1303428	2524464	5235237		1866766	25251630	1919710	20288180	15309696	9304870	8814666	29218906	7966075	8308599	9589847	7684906	12896652	2122983	7611052	2467023	10124678	3440237	2567926	2403685	418714	2126018	13780908	6044266
110	pipecolate	Amino Acid	Lysine Metabolism	1444	LC/MS Pos Early	1025	2200	130.086	4043-87-2	849	826	C00408	HMDB00070	320215520	10089244	26719808	20841048		302319168	12811075	6407483	163481200	161565456	248438576	4596646	9996849	257541952	93823856	32792940	463099552	1661215488	174951104	696806464	562617600	641368640	665942848	120764184	1357906560	343722304	613358784	631325632	606975168	109921680	138672768	187347344	1084256	56849268	11677888	23446742
3811	piperidine	Xenobiotics	Food Component/Plant	38183	LC/MS Pos Early	100002398	2500	86.0964	110-89-4	8082	7791	C01746	HMDB34301	38488724	24102608	24110200	13778051	12610623	5006646	17659912	7399073	104517352	13445151	76587152	4640061	3794167	103349360	4025839	2791448	70930336	971016	98776200	27210036	20892748	15808625	21930802	4097705	263188624	23052112	24117208	29366492	4908810	4155853	13256631	8131435	29014502	4070525	6454580	59055800
4087	piperine	Xenobiotics	Food Component/Plant	33935	LC/MS Pos Late	100001267	1168	286.144	94-62-2	638024	553590	C03882	HMDB29377	17650704	187845776	1887062	484252	358744	6942306			3953036		171597			24572868	44294156	31483848	21817482	12890944	1841068	3564768	1705479	47969944	297021		18448606	561726	26055228	326148	3127758	6098469	20162798	1306209	15674772		2517392	746236
2651	pregnanolone/allopregnanolone sulfate	Lipid	Progestin Steroids	48394	LC/MS Neg	100006173	5160	397.205																										596381									75973
2624	pregnenediol disulfate (C21H34O8S2)*	Lipid	Pregnenolone Steroids	32562	LC/MS Neg	100001993	3868	238.077											69508									3393555				20579		24989264			833325				176351		6783474
2625	pregnenediol sulfate (C21H34O5S)*	Lipid	Pregnenolone Steroids	32619	LC/MS Neg	100002067	5000	397.205	1247-64-9		13465233													69076				1231683						10712051			2792939						5048591	158570
2608	pregnenolone sulfate	Lipid	Pregnenolone Steroids	38170	LC/MS Neg	100002129	5100	395.19	1247-64-9	105074	94802		HMDB00774															201631						6156882			232609						4505567
1302	pristanate	Lipid	Fatty Acid, Branched	38271	LC/MS Neg	477	5773	297.28	1189-37-3	123929	110458		HMDB00795	1180892	3062419		837037		1186067			693135	6274977	1009007			999869		14527854	1075416	585761	831384	728354	321971	665704	454865	245128	1823777	2298623	1643105	540529	551275	1229477	510834	560975			1393662	1055529
376	proline	Amino Acid	Urea cycle; Arginine and Proline Metabolism	1898	LC/MS Pos Early	480	1603	116.071	147-85-3	145742	128566	C00148	HMDB00162	893231808	529087104	52441508	119398792	136408352	2580064768	145942144	25996052	524944096	298579744	571472064	17461832	104421280	2421687808	655426816	2198239488	1101835136	1302129664	502576000	4047916288	1107134592	1818771200	1382387584	289158272	1843910784	1922379136	3171690240	599608000	1637500672	802451712	341761856	1173726336	20729816	87359760	837503552	1626897536
1405	propionylcarnitine (C3)	Lipid	Fatty Acid Metabolism (also BCAA Metabolism)	32452	LC/MS Pos Early	100001162	2590	218.139	17298-37-2	107738	96904	C03017	HMDB00824					694401	3710156		615372	1650209	2094398			1276337		1295797	1609722	1808341	1702663	1486754	1301248	1976262	946725	992638	1027642	816689			2088472	2581706	4400979	2250725	861568	348583	2323996	3115913
61	propionylglutamine	Amino Acid	Glutamate Metabolism	54909	LC/MS Pos Early	100010846	1140	203.103			32469839			1367555	943706	353263	231400	1134331	6605478	467355		2657505	1713284	1460430	394870	400516	2165652	3980264	1883632	9837469	2277896	1540801	1828709	4564936	2374332	3571431	737494	1505777	6353213	2518146	12234165	8109105	10443709	2391856	687477		524199	2319623	930707
1406	propionylglycine	Lipid	Fatty Acid Metabolism (also BCAA Metabolism)	31932	LC/MS Neg	100001150	960	130.051	21709-90-0	98681	89122		HMDB00783	258197	163725				334071					478989			267914	146496	582857	379404	357186	67513	2489751	169410	215579	392113	135304	647023	266710	1875250	180078	640172	1288186	182807	458924			224567	729167
3642	protoporphyrin IX	Cofactors and Vitamins	Hemoglobin and Porphyrin Metabolism	39321	LC/MS Pos Late	100000292	1417	563.265	553-12-8;50865-10-5	4971	10469486	C02191	HMDB00241						15725214								104750608	5978938	593830		30909600	1131889	440275	23602636	646648	98629368	26396564	3739399		5279477	14530154	1465369	383781		8605601			21452184	2253523
3480	pseudouridine	Nucleotide	Pyrimidine Metabolism, Uracil containing	33442	LC/MS Neg	821	1100	243.062	1445-07-4	15047	21403010	C02067	HMDB00767	839906	353139	73288	44692	235289	5157872	171651		1660744	369468	910460		85871	9095443	1867573	8524342	3610406	3225029	1791208	5628643	1600249	5164072	1858666	306802	11536392	2079084	6320273	2970214	1507256	2410309	381629	11066595		121640	1510562	13317826
3632	pterin	Cofactors and Vitamins	Pterin Metabolism	43023	LC/MS Pos Early	100004216	1805	164.057	22363-60-4	73000	65806	C00715	HMDB00802	824825	170810	333857	195463	2343231	1552028	577994	37306	948945	1726243	2120859		473752	1245830	511981	547204	1058151	1896610	1583577	776608	1639632	4390219	649165	2434590	552165	900474	2989131	2717858	3166107	1566521	1317450	1379736		953342	2289306	1012139
408	putrescine	Amino Acid	Polyamine Metabolism	1408	LC/MS Pos Early	49	3027	89.1073	110-60-1	1045	13837702	C00134	HMDB01414	61478008	1415664	3321364	1407651	14634580	148603184	16141432	852920	34532204	9241682	8812944	3067133	3455845	186292992	11548311	7833853	14723550	2057257	18691688	131647032	3145312	17433804	15331026	167414320	12867280	18283666	5728003	7394551		183011152	9187245	6091599	1359047	3020259	2006132	11663742
3683	pyridoxal	Cofactors and Vitamins	Vitamin B6 Metabolism	1651	LC/MS Pos Early	491	2343	168.066	65-22-5	1050	1021	C00250	HMDB01545	8962346	4599245	4156707	3051220	4804405	14347544	5075703	4396332	15204869	11670951	6997591	3933072	3920816	41705400	1246583	12632140	10594527	8976785	7595613	21431852	12176170	8846004	13712774	5171007	15296704	12422436	13855199	9133920	9291540	910829	9728464	9853119	2270012	4011667	7061649	6998481
3680	pyridoxamine	Cofactors and Vitamins	Vitamin B6 Metabolism	2150	LC/MS Pos Early	568	2975	169.097	58052-48-5	1052	1023	C00534	HMDB01431	51188532	17429758	4791870	3861201	22823870	22744992	9907618	1166676	42278848	27210366	57328404	1311479	6243597	67577544	26085890	35722564	67421376	46990196	40273532	65844864	46173552	100760624	51890952	64008824	50711456	50931072	29112776	44606224	51594152	40625620	42020260	34066572	1583394	8352775	39601160	30463568
3684	pyridoxate	Cofactors and Vitamins	Vitamin B6 Metabolism	31555	LC/MS Neg	100001121	2185	182.046	82-82-6	6723	6467	C00847	HMDB00017	64578584	4354931	9654886	1254833	12167342	31541784	6093053	799345	37980224	7796687	26749160	204045	419849	163590848	8930025	19581688	55215572	26221198	14722009	96190824	32757868	78483864	74439200	34614856	50344536	59222688	22107076	34285040	39334776	27158124	12600801	18242292	101536	5322612	21115864	13345899
3678	pyridoxine (Vitamin B6)	Cofactors and Vitamins	Vitamin B6 Metabolism	608	LC/MS Pos Early	936	2442	170.081	58-56-0	1054	1025	C00314	HMDB02075	9132010	797536				1809778			13599161	494072	993940			32721828		2703474		10705725		11708823			12603179	35893104	13193187			6174963	2041316			1980844			782998
51	pyroglutamine*	Amino Acid	Glutamate Metabolism	46225	LC/MS Pos Early	100001540	1900	129.066	2353-44-8	134508	118562			2635474	2068305		1858884	1574376	5800630		339885		696276	4844544		859928	4400823	1415081	2681738	4262280	2323030	1103103	6561713	1996066	2113537	4137507	3272605	2367700	2887556	4007055	3020318	4166641	5258936	2111274	1631162		682720	4270659	1839340
4194	pyrraline	Xenobiotics	Food Component/Plant	48428	LC/MS Neg	100001767	2304	253.119	74509-14-1	122228	19980286		HMDB33143	738710	1506906	250129	1017178	230939	26185180	545565		5048796	1188602	1080470	169063	147661	17610468	1801113	167763	17325764	370664	887177	474557	243949	473457	389066	2379489	9830150	6811193	1138656	339187	157152	6783881	202294	1246457		115705	381195	1022408
945	pyruvate	Carbohydrate	Glycolysis, Gluconeogenesis, and Pyruvate Metabolism	48990	LC/MS Polar	823	1083	87.0088	127-17-3	1060	96901	C00022	HMDB00243	4230321	705022				2460196			2589213		5230967			4811790	3582170	2489313		3105737	906574	3600684	1635053	2997933	2927241	1408066	2569417	2912807	4808757		938351		969964	4869029			2021940	1924435
4116	quinate	Xenobiotics	Food Component/Plant	18335	LC/MS Polar	100000442	2432.9	191.056	77-95-2	6508	10246715	C00296	HMDB03072	251749696	40828812	34676652	41459064	52904088	6011382784	25982644	1913301	667614016	67553848	75674112	36073568	26099744	224813248	1153284480	29712530	316722432	134882752	231963728	67179792	364992064	62737520	19883536	1406329728	284747904	1085211904	21996638	440674240	294324032	5507556352	149901728	321512768	12927724	55615128	214623424	34165072
4453	quinine	Xenobiotics	Drug - Antibiotic	39767	LC/MS Pos Early	100002968	3378	325.191	130-95-0	2728270	2010267								160188																			16218359
3549	quinolinate	Cofactors and Vitamins	Nicotinate and Nicotinamide Metabolism	1899	LC/MS Pos Early	182	845	168.029	89-00-9	1066	1037	C03722	HMDB00232	86378					486106			101029					574758	681468			1305970		207502		526136	312734	291515	280560	143691	95416			198916	221250					368743
964	ribitol	Carbohydrate	Pentose Metabolism	15772	LC/MS Polar	100000406	1789.6	151.061	488-81-3	6912	10254628	C00474	HMDB00508	555560	347088			190697	1375805			1003639	231380	1271147			3001420	184624	511307	1325501	1946625		4330517		785302	139915		3571034	408241	1716371	1054512	809944	1092409	167025	1660235			497029	1476946
3577	riboflavin (Vitamin B2)	Cofactors and Vitamins	Riboflavin Metabolism	1827	LC/MS Pos Early	500	2292	377.146	83-88-5	493570	431981	C00255	HMDB00244	6221782	1926746	914875	356241	1885538	6347328	1653939		7743044	4674560	3875859	145613	574265	11209004	4965124	7818734	5819615	5956632	5948393	11201073	5237720	15244203	7385321	4729327	7426068	12266199	8637209	5082879	7051525	8745266	5261819	7670600		1402583	8407770	4867325
965	ribonate	Carbohydrate	Pentose Metabolism	27731	LC/MS Polar	100001007	2425	165.04	5336-08-03	5460677	4574162	C01685	HMDB00867	2763414	2964763	1597946	1620050	1611985	22132294	1707617	1210908	9204836	1637744	6714584	1585910	4215315	11312495	3538712	170940832	3920476	299015808	2193937	588766144	1675941	29563312	3303484	420904960	33400132	19763880	7435972	2254834	3214545	12533312	1354221	8047008			756228	3663413
990	ribulonate/xylulonate*	Carbohydrate	Pentose Metabolism	61858	LC/MS Polar	100019968	2350	165.04						1759404	1407649		1120563	1791327	13763527	874462		2081715		2425206		869114	15125666	2898029	6117942	4272210	9463929	1734512	11232955	3235547	16150548	1394149	40521312	2634763	4624303	6129926	2952344	4907543	7080924	1011790	7874859			1140893	3014977
59	S-1-pyrroline-5-carboxylate	Amino Acid	Glutamate Metabolism	42370	LC/MS Pos Early	35	1528	114.055	2906-39-0	1196	10140206	C04322	HMDB01301	2012194	1055064	385970		698907	3128790			1360337	996865	2633203			2626968	701692	3337274	2249047	1490088	650715	2107080	2130864	2578150	4998171	1891250	1476096	1193700	2006867	2076442	2033870	1370533	1674520	1179690			1582666	941649
347	S-methylcysteine	Amino Acid	Methionine, Cysteine, SAM and Taurine Metabolism	39592	LC/MS Pos Early	100002749	1955	119.016	1187-84-4	24417	22826		HMDB02108	745580	58379				339215			145756					396747	159983		398714		161610	1029131	332039	627385	65587	742156	186833	505460	538557	128265	95442	593695		489257			160164	370727
348	S-methylcysteine sulfoxide	Amino Acid	Methionine, Cysteine, SAM and Taurine Metabolism	43378	LC/MS Pos Early	100002927	900	152.038	6853-87-8	82142	74136		HMDB29432	501908	520336	796939	783384	616193	269269	464351	1309348	432792	351876	493192	652853	581390		953621	741414	353661	723866	639386	417102	409515	408326	492458	290016	498176	566149	763023	733107	711913	374597	634695	520156	699708	644134	535510	605018
4121	saccharin	Xenobiotics	Food Component/Plant	21151	LC/MS Neg	100000870	2000	181.992	81-07-2	5143	4959	D01085	HMDB29723		9558756		2709414		239206			192257					430565	20532170	166266	298811		332497			419779					11659805	584685	3724917	95892528	168736	1841419
101	saccharopine	Amino Acid	Lysine Metabolism	1495	LC/MS Polar	392	3991.9	275.125	997-68-2	160556	141086	C00449	HMDB00279	5942380	2325788			1891766					2055901	3055724			474774		15197854	1178884	5165484		5293705	273670		3303710		3636097	337058	9268634	312643	873310		236912	4892491		730534	569482	2944573
4670	salicylate	Xenobiotics	Drug - Topical Agents	1515	LC/MS Polar	501	802	137.024	69-72-7	338	331	C00805	HMDB01895	1591470	3036731	1656925	2138975	1830633	3552028	1204359	1168643	4696710	1913860	2917622	1435039	1391433	2952489	2130877	1765973	2221830	2004993	3583631	2680519	1606780	13954706	1807023	40986472	7090373	3978720	3777861	1859027	960271	4056599	1576788	3056976	701532	1023705	1043284	1072503
4	sarcosine	Amino Acid	Glycine, Serine and Threonine Metabolism	1516	LC/MS Pos Early	1023	1280	90.055	107-97-1	1088	1057	C00213	HMDB00271						10537281					610629			6495659	1852618	1433785	690745		1897432			2428352				1943446		1291180		4478592	231665
1328	sebacate (C10-DC)	Lipid	Fatty Acid, Dicarboxylate	32398	LC/MS Neg	100001211	1788	201.113	111-20-6	5192	5004	C08277	HMDB00792	2892979	192865	261873		4250669	1101400	664870	413785	581242	931526	2583316		200335	2043500	467288	8083292	6830907	7073827	1789735	5945962	1432249	1527514	627482	636505	4689318	878126	3214381	1320447	3382173	770767	1032819	1359703	397603	735236	3585592	2608655
989	sedoheptulose	Carbohydrate	Pentose Metabolism	53237	LC/MS Pos Early	100002619	681	228.108	3019-74-7	5459879	4573620		HMDB03219	6364142	3507685			894243	23807154	646851		4693816	1787822	5592245			55162608	10323986	30292884	9958685	11424272	5649436	12097540	7187222	41448436	9594026	9142750	21926538	9591014	8738791	16528382	5442755	17504152	2458369	21241814		1321270	6070158	37896144
9	serine	Amino Acid	Glycine, Serine and Threonine Metabolism	1648	LC/MS Pos Early	503	1239	106.05	56-45-1	5951	5736	C00065	HMDB00187	159186720	58969488	10233525	13310211	47568244	507874496	27929228	4128513	87897800	42904296	122529600	3649479	25784018	366009344	189417712	79671440	226655424	110531528	130690960	251355504	238770432	482441632	281313152	55949272	207670320	264855552	244731552	116681816	169168112	347296864	77473152	193014896	3070881	14747577	168061360	150999600
231	serotonin	Amino Acid	Tryptophan Metabolism	2342	LC/MS Pos Early	504	2550	177.102	153-98-0	5202	5013	C00780	HMDB00259	5199861	305361	1099963	364622	911341	4106100	361182		2181898	1559899	1481793	174205	243540	4984929	1212845	365418	5530289	4838133	974081	3187196	3088034	7148953	4607673	3782125	3814918	1277558	868895	2452196	1725756	6022912	1336038	870034	322670	2478155	1377551	312707
4132	sitostanol	Xenobiotics	Food Component/Plant	52233	LC/MS Pos Late	100001983	3300	399.399	19466-47-8	15559396	20171868	C19644	HMDB00494	46592176	4446561	2434458	3847195	5856068	46551208	2116476	308671	30787828	24676996	16504834	185863	7951232	19847356	452151	44635436	108805008	27976588	8820385	25462160		45830100	12184780	3264406	3786689	17099360	23165292	118930800	33016720	12104473	4337684	12142517	2269035	3517126	20203592	10405563
244	skatol	Amino Acid	Tryptophan Metabolism	33021	LC/MS Neg	100001233	4875	130.066	83-34-1	6736	6480	C08313	HMDB00466	2266702	6931110	19883896	14523122	12240513	143733	5230735	577004	3795799	27536188	35271000	4025708	14208260	471757		68142	1074116		206938	549870	60831		342031	80859	1355631	987015	3199188	64074	414507	90235	539335	79010	2511211	4829360	127048
4133	solanidine	Xenobiotics	Food Component/Plant	39788	LC/MS Pos Late	100002773	1010	398.342	80-78-4	65727	59150	C06543	HMDB03236	2107392	34951596	2074436	8019150	580549	1241257344	714127	16736266	23717116	3224641	2069999	127954304	23749430	11974096	20556096	232271792	4524526	559509824	45680168	2471840	745302336	12668046	527988768	380453024	90680128	660768832	89996592	1026292	18711038	505549600	10811809	11798356	42697232	96241080	171848816	176523
411	spermidine	Amino Acid	Polyamine Metabolism	485	LC/MS Pos Early	50	3355	146.165	124-20-9	1102	1071	C00315	HMDB01257	17734924	39106056	7458486	940497	27627500	42863644	28903760	279299	116978744	96235008	83408432	2011479	2120388	53779748	6100582	1177672	9337777	676325	13185883	6944246	10590912	16094120	8436696	15848410	19094342	5993019	628372	39958456	2380095	12554781	78295336	4619326	2270004	10501674	2316413	3285407
2414	sphingadienine	Lipid	Sphingolipid Synthesis	57426	LC/MS Pos Late	100015643	1350	298.274	25696-03-1	6449795	4952479			2399694	2003886	850269	3402556	2741067	38086296	2067200	4689316	4978841	1330520	4891102	1784883		36797032	7022816	2647515	16003501	12882665	3829646	2244402	3009879	16859968	5529175	41235956		13289981	2660996	10235673	3932477	10992362	33342736	338818			6270378	599583
2412	sphinganine	Lipid	Sphingolipid Synthesis	17769	LC/MS Pos Late	313	1413	302.305	3102-56-5	3126	3014	C00836	HMDB00269	13963665					463712928					2169146			127913696	19817068	10151281	152198016	174588400	15725663	27007260	71592280	26192324	144293008	170070768	34224324	96666968	60612936	443657824	88409760	141398928	12697358	46574608			65432544	20961672
2531	sphingosine	Lipid	Sphingosines	17747	LC/MS Pos Late	297	1393	300.29	123-78-4	5353955	4510275	C00319	HMDB00252	8452814					156436016		2645757	3691601		2810996			122369960	23296498	3369175	54154240	36271628	10292283	6476154	6581044	54807240	20987704	149056144	6525808	42537008	9396368	30886824	21981444	103497872	81543480	5460001			14477267	3370191
4141	stachydrine	Xenobiotics	Food Component/Plant	34384	LC/MS Pos Early	100001296	1440	144.102	4136-37-2	115244	103115	C10172	HMDB04827	302670624	39509008	2939412	1632288	9535717	353572480	16813576	3837963	90460000	91037168	52173168	263865	968619	663260288	81816800	1115680	167629824	19536596	61425924	600885440	5031029	97689288	476047680	295873632	1164865792	186108592	376379808	100186432	183229344	81150696	70232480	57522684	920543	4339794	17130800	90459592
1384	stearamide (18:0)	Lipid	Fatty Acid, Amide	37487	LC/MS Pos Late	100002105	1800	284.295	124-26-5	31292	29032	C13846	HMDB34146	17585566					26999360								17251268	17443208	22461258	27007122	28419160	20247014	25119252	17238620	26440566	18228952	18794842	21858154	19854296	20874478	20735240	21824004	22492110	22065804	24741208			31757834	20767514
1186	stearate (18:0)	Lipid	Long Chain Fatty Acid	1358	LC/MS Neg	439	5872	283.264	57-11-4	5281	5091	C01530	HMDB00827	4795389440	6174163456	6229233152	11038451712	6068689408	4195590144	1949404032	1390032896	6035387392	10472388608	14472416256	1322719104	8745401344	4067695616	3367934720	18610692096	3279831552	10752242688	3338337024	14927071232	1321844736	5497758208	8264825344	4050563840	6133822464	3246743552	11122364416	3714078976	2836185088	2273952256	4039616000	10065093632	7351929856	11250164736	13278873600	7469733376
1219	stearidonate (18:4n3)	Lipid	Polyunsaturated Fatty Acid (n3 and n6)	33969	LC/MS Neg	100001229	5395	275.202	111174-40-4	5312508	4471933	C16300	HMDB06547						1403657											267758		302763					3727662						625923	594611
1676	stearoyl ethanolamide	Lipid	Endocannabinoid	38625	LC/MS Pos Late	100002254	1787	328.321	111-57-9	27902	25958		HMDB13078	23419020	25238502	45883548	40382552	16967224	183713824	13127015	12379560	50906032	41765584	48036860	9654263	18185052	26586048	27747808	47808840	35231136	46982444	33636648	35742440	25957912	62386800	34727760	73834160	33876532	59136748	42588600	45692952	36922588	82341856	36927008	43632088	39411232	37086240	41099068	39554448
2504	stearoyl sphingomyelin (d18:1/18:0)	Lipid	Sphingomyelins	19503	LC/MS Pos Late	1538	2400	731.606	85187-10-6;85187-10-6	6453725	4956085	C00550	HMDB01348	78517			155188	370892	2662636		178974			833448	517392	406841	10552821	1947420	1923335	9915425	1795865	1806164	2580299	763603	1315308	839851	10971846	357333	394714	2080423	364225	848707	531721	196184	326881			227040	1436392
1455	stearoylcarnitine (C18)	Lipid	Fatty Acid Metabolism(Acyl Carnitine)	34409	LC/MS Pos Late	100001391	1485	428.373	18822-91-8	6426855	21233653		HMDB00848	1139862					73443712								21675566	3300878	4584556	15535524	5256466	7553906	820922	14483067	21632360	2345115	21093586	2543895	19923498	6589772	10630926	6325832	22994578	734556				8815992	2761577
1510	stearoylcholine*	Lipid	Fatty Acid Metabolism (Acyl Choline)	57464	LC/MS Pos Late	100015759	1520	370.368											506941									126651	188024		609613	98380			150858								137932		55317
2588	stigmasterol	Lipid	Sterol	21183	LC/MS Pos Late	100000923	2875	395.367	83-48-7	5280794	4444352	C05442	HMDB00937	3011242		1917559		553302	8131319			2881091	2055953	1504587			7696521	558798	3297223	3214025	4238198	828552	2191198	1155112	7608443	1093552	7206386	139437	2608932	1336740	4990098	3745510	3190420	888514		620975	334611	1720552
1323	suberate (C8-DC)	Lipid	Fatty Acid, Dicarboxylate	15730	LC/MS Neg	100000016	804.3	173.082	505-48-6	10457	10025	C08278	HMDB00893	3661587	188323			1766126	2029945	611575		723571	1189399	2054708			5610370	557193	4528228	8509695	4181444	1925053	7920484	3545003	2079883	1875134	1291229	5923366	1374175	2329114	1992023	2756184	812805	1140107	1429874		635444	4238247	2038413
1131	succinate	Energy	TCA Cycle	1437	LC/MS Polar	252	3149	117.019	110-15-6	1110	1078	C00042	HMDB00254	394469728	99733776	17231212	16632680	48867972	243920000	89758928	7763496	265974464	105504560	384744672	8990811	25658974	935391424	70354160	869060608	167127440	441268224	76837024	2043404800	258028528	485597024	435939744	5388853248	382688160	137439408	866786048	128665192	228321360	2974437120	79366368	342970432	10330709	56626012	114810376	586707712
4853	succinimide	Xenobiotics	Chemical	41888	LC/MS Polar	100003696	2155	116.035	123-56-8	11439	10955	C07273		2544159	4569125	4029026	5291190	5559947	1273250	10581372	1599722	8815990	10076212	6679078	5237986	6638165	1767124	630340	5674232	1032803	1895602	822376	5599277	883768	4721895	1379542	2943865	1225358	1097757	1974213	984913	1480776	1733673	9460815	1111084	10426429	7525412	749288	826869
1130	succinylcarnitine (C4-DC)	Energy	TCA Cycle	37058	LC/MS Pos Early	100001948	2291	262.129	256928-74-2	71464481	28639166		HMDB61717	3891112	1583381			792257	2360114	509292				2356947	71244		5114827	1104231	3757920	6862738	2141763	2838167	6053198	2242805		4564653	1135173	3337313		3257128	3257848	2145429	2287914	2038963	1085794		918529	7967786	3313804
3850	sucralose	Xenobiotics	Food Component/Plant	36649	LC/MS Neg	100001789	3140	395.007	56038-13-2	71485		C12285	HMDB31554		658378688	13640849	150470		42793								1347177	2837948	80288					4525367							3662444	518650							576052
1021	sucrose	Carbohydrate	Disaccharides and Oligosaccharides	1519	LC/MS Polar	935	3092	387.114	57-50-1	5988	5768	C00089	HMDB00258		985807	1928013	1774835	2674612		634037	1838425	1332074	3137662	1063643	967301	1600238		598126	3025965	562828	1317624	2288031		1766048					601631	1187811	842481	20431884	1394149	711352		1951849	1585887		580947
4746	sulfate*	Xenobiotics	Chemical	46960	LC/MS Neg	100002528	616	96.9601	14808-79-8	1118	1086	C00059	HMDB01448	1287337	962169	1071450	670700	1805951	37861856	2887020	1067780	7267670	3547839	2865380	594324	1047893	31653682	11057024	2967248	2277525	7011696	6853855	11324477	8081236	52567748	9536733	21407296	986751	10425593	3657570	3436791	1637970	10889784	1331505	17130432	897894	1531628	3543716	1872002
4148	syringic acid	Xenobiotics	Food Component/Plant	37091	LC/MS Neg	100001919	1450	197.046	530-57-4	10742	10289	C10833	HMDB02085	85859	629348	80633			761966				166768	210070			448817			209672	83943	6258371	332923	180361				1601096	46261	144305	221338	215716	211488	226125	1417732		267222	185548	352120
4149	tartarate	Xenobiotics	Food Component/Plant	15336	LC/MS Neg	100000295	615.3	149.009	87-69-4;6106-24-7	444305	852	C00898	HMDB00956		130134	59969	306356	236371	305323	517510		95789					1016941					953436		21172			30902	232176		68813				768201	78524	18391	42991		68510
358	taurine	Amino Acid	Methionine, Cysteine, SAM and Taurine Metabolism	2125	LC/MS Pos Early	512	660	126.022	107-35-7	1123	1091	C00245	HMDB00251	9178094	617515	916180	416951	316483	353506112	2673399		871251	597800	3100753		65267	10279124	29138290	1875323	12089332	3062829	1589956	4508923	2014694	28922772	2473273	93549848	4227976	170774368	5814200	6102356	576024	311973824	1864137	2318768			1531083	1237117
2760	taurochenodeoxycholate	Lipid	Primary Bile Acid Metabolism	18494	LC/MS Neg	1629	5250	498.289	6009-98-9	387316	343282	C05465	HMDB00951	133126	361311		516826	193173	2177043	115274		125723	596016	758950	240408		3156464	4376116	240750	1682288	619188	202068	210927		969810	169045	272567	217972	279807	78882	481389	32187	1953525	236131	499628	135730	202246	551591	291798
2757	taurocholate	Lipid	Primary Bile Acid Metabolism	18497	LC/MS Neg	1648	5150	514.284	145-42-6	6675		C05122	HMDB00036	240724	414420	847842	278401	254744	10947548	190414	208742	264792	265598	705975			1465080	10510938	451455	2388852	709791	314135	355851	371770	324354	340367	264101	532815	456398	143236	505890	654774	1158065	278448	774912	265943	253190	359465	291406
2811	taurocholenate sulfate*	Lipid	Secondary Bile Acid Metabolism	32807	LC/MS Neg	100001990	4750	279.614																174949			68353	272489				70911			35906		712646					41498	775231
2778	taurodeoxycholate	Lipid	Secondary Bile Acid Metabolism	12261	LC/MS Neg	1668	5257.4	498.289	207737-97-1	2733768	2015539	C05463	HMDB00896		176048	640087	436579	122648	7132622	185998		499173	368758	1311333		172687	2380814	596811	255890	2581016	378950	38008	71483		226855		1442939	586964	4630664	568089		533036	1867991	265737	1095968		129280	276147	238130
3778	theobromine	Xenobiotics	Xanthine Metabolism	18392	LC/MS Pos Early	100000445	1600	181.072	83-67-0	5429	5236	C07480	HMDB02825	708378	4484845	838752	3235664	821292	29360548	397180		1975789	4270957			373031	2134365	17394842	2378360	3581516		8256742	2124049	8791109	5400407	1317148	1954754	768695	11146066			280695	12179075	1651789	19223256	723001		4933286	789634
3779	theophylline	Xenobiotics	Xanthine Metabolism	18394	LC/MS Neg	100000437	2356.9	179.057	58-55-9	2153	2068	C07130	HMDB01889	356866	79252	107753	119466	362688	2492915			127995	287146	381190			345989	1246282	473058	725367	445702	806769	151163	1375749	233443	183910	484092	758231	967929	658659	660547	795631	2181406	539226	966633		254624	1582849	595212
3656	thiamin (Vitamin B1)	Cofactors and Vitamins	Thiamine Metabolism	5341	LC/MS Pos Early	873	3050	265.112	59-43-8	1130		C00378	HMDB00235	43795792	16687142	3152134	10386022	14855241	60223720	16626456	315033	49363992	1118260		633819	578499	7577870	9989769	75087128	73650176	40274828	39652952	71998632	53810832	46038096	46731100	16967968	96373592	62945700	24637080	76783704	52090952	29508916	32929236	130451152	1612437	3604468	56362620
4885	thioproline	Xenobiotics	Chemical	53231	LC/MS Pos Early	100009232	1250	134.027	34592-47-4	93176	84120			1725966	185570	141907	54916	186802	1380796	450739		1328211	501768	1667925		88856	3461850	511033	795256	755105	175159	414328	841918	1100617	5700196	599267	1754323	707879	1867006	826828	438444	234866	2881247	889356	158370		158565	428723	1251074
3593	threonate	Cofactors and Vitamins	Ascorbate and Aldarate Metabolism	27738	LC/MS Polar	100001022	2384	135.03	70753-61-6	151152	133224	C01620	HMDB00943	4724100	4807205	1245940	2973433	4371879	78733488	1669668	415921	2890386	2077128	7187184	1081049	1146057	34029616	8712787	11540451	28672468	19365952	9097547	18230292	12043031	36071556	8302700	5532518	5131451	17126298	8985148	14332814	8759647	14032810	5079429	16313734	1338317	995151	4555422	11727773
16	threonine	Amino Acid	Glycine, Serine and Threonine Metabolism	1284	LC/MS Pos Early	564	1514	120.066	72-19-5	6288	6051	C00188	HMDB00167	404649888	107185504	11071685	13178580	89245072	1399296768	40362136	2509482	166033360	61887756	336202848	3285437	35851168	917999744	473737856	404540864	707153088	315552000	364728224	805400640	703172096	1552907776	779600448	238577280	731367616	688076608	852092800	326616448	624664256	754690112	111272896	585916224	3535256	14113145	445367712	579489216
774	threonylphenylalanine	Peptide	Dipeptide	31530	LC/MS Pos Early	100001125	3077	267.134	16875-27-7	4099799	3313819		HMDB29068	6050941	9118960	1942608	2294739	9874713	1801516	11323812	757507	31433360	21122604	33191588	1039987	1813600	2853757	1817443	671509	1598482	1864303	588198	798648	1113914	1410778	2842884	6755131	708013	948249	1040383	807181	2029029	2843168	13214100	555048	1336052	4217015	835125	561394
3529	thymidine	Nucleotide	Pyrimidine Metabolism, Thymine containing	2183	LC/MS Neg	872	1963.7	241.083	50-89-5	5789	5585	C00214	HMDB00273	3992074	201397	75831	438870	203685	4450543	164447	41351	545878	680566	237769	71340	238270	16972144	7630012	1774372	7482805	5145516	15986278	5903383	7416837	26034464	9393559	15939684	6047955	1600926	3018635	10758563	7780050	26355848	1484512	5209157	79410	102649	9791355	8952222
3525	thymidine 5'-monophosphate	Nucleotide	Pyrimidine Metabolism, Thymine containing	12023	LC/MS Neg	1248	883	321.049	33430-62-5	9700	10239189	C00364	HMDB01227														106655		52118	45616	24778	106453			68575		433110
3530	thymine	Nucleotide	Pyrimidine Metabolism, Thymine containing	604	LC/MS Neg	882	1654	125.036	65-71-4	1135	1103	C00178	HMDB00262	4294856	1035933	222376	97990	329615	87497088	276757		4525282	497722	1572640		481729	120694736	18211656	36224176	43659284	17817832	18127384	99068248	33863104	73801760	29545548	2952193	42599304	43624936	46278072	34799568	28369396	10650418	1352779	71277528		245704	48081772	44119112
388	trans-4-hydroxyproline	Amino Acid	Urea cycle; Arginine and Proline Metabolism	32306	LC/MS Polar	1001	2845.5	130.051	51-35-4	5810	5605	C01157	HMDB00725						4355728	1051947							7179087		393650	874826	852018	531281	2903567		2507092		2677239	1173826	567857	759044	799315	799530	1269052		918876
72	trans-urocanate	Amino Acid	Histidine Metabolism	607	LC/MS Pos Early	537	2285	139.05	104-98-3	736715	643824	C00785	HMDB00301	171852752	45186764	12252875	9708771	49229456	461494784	22182668	5275726	193532384	110283424	170034864	4928887	23397236	88590016	198814976	40044236	207548384	43003672	106664096	42893344	222665536	361538112	74307072	19270536	118121712	270673696	122484792	87853800	111165360	21577680	73006048	189242960	2948994	13409448	135031760	138437360
1138	tricarballylate	Energy	TCA Cycle	15729	LC/MS Neg	2053	578	175.025	99-14-9	14925	14220	C19806	HMDB31193	41125152	20251392	4569263	3796996	46576280	136686672	15677347	4303746	34947976	35013348	84540352	432333	932180	105142360	4394530	5435917	33823824	146294368	4805143	339392032	72562616	41540952	113765080	7862788		6133446	95125184	8479791	9985184	2130519	37902928	33436492	63296516	9113345	23454536	42200712
3570	trigonelline (N'-methylnicotinate)	Cofactors and Vitamins	Nicotinate and Nicotinamide Metabolism	32401	LC/MS Pos Early	100001092	1388	138.055	535-83-1	5570	5369	C01004	HMDB00875	1331392	4613977	1467712	5618299	15329018	171907968	1870842	664419	10859287	32994614	2323159	1046789	1321366	15054849	37168668	1502182	4467102	2265427	3474788	18478498	162656448	8019550	15783138	30193576	3253113	74903648	1418267	2987898	4005343	93370336	61940052	49359884	946477	1029920	47398352	1304800
1747	trimethylamine N-oxide	Lipid	Phospholipid Metabolism	40406	LC/MS Pos Early	100003397	2100	76.0757	1184-78-7	1145	1113	C01104	HMDB00925	2360203	1095943	569392	529785	1175504	2397530	864046	776051	1186345	614013	2057905	889186	727577	2176899	2574976	549647	5501097	378044	5631136	3603835	1077455	5419185	1567581	13043440	2686520	3695964	3871787	1941559	608945	15104302	2444601	1523316	1416713	838975	1038296	2719265
4857	trizma acetate	Xenobiotics	Chemical	20710	LC/MS Pos Early	100000856	1884	122.081	6850-28-8	6503	73346	C07182		1505524352	6525252608	4997580800	4660155904	8374019584		9690079232	1864031104	6236370432	8259364352	6552572928	6594979328	6155618304																		4366674944		8050970112	4218473984
236	tryptamine	Amino Acid	Tryptophan Metabolism	6104	LC/MS Pos Early	1095	3062	161.107	61-54-1	1150	1118	C00398	HMDB00303	11374341	253220	914148	530841	22654556	624657	233840	856880	76032576	322050	61662220	2473007	46055540	10858134	147417	5158111	21435732	2537777	10955690	1608740	4055115	159744	418172	1905192	6176611	135315	303378	300444	1461571	2927714		55955196		315640	149610	33156332
207	tryptophan	Amino Acid	Tryptophan Metabolism	54	LC/MS Pos Early	565	2986	205.097	73-22-3	6305	6066	C00078	HMDB00929	247245536	118710864	19721080	19407234	45327380	470308032	27239668	4530176	131493504	47838860	268774176	4376494	26162468	326687552	233340608	173343344	241928880	105415848	119667160	261389904	264353168	586664832	353411680	127588408	162512304	306320800	402497920	121487328	168393488	295811744	60926908	161555648	2080223	13962606	164896560	245052064
216	tryptophan betaine	Amino Acid	Tryptophan Metabolism	37097	LC/MS Pos Early	100001743	2673	247.144	20671-76-5	442106	390633	C09213	HMDB61115			3807117			5748504			78217704					20583920							1894147							5331147
784	tryptophylglycine	Peptide	Dipeptide	43028	LC/MS Pos Early	100003609	2930	262.119	7360-09-0	263471	231453		HMDB29083	3426171	2785575	972709	535918	1131383	167416	1192763	265612	8551007	2616411	9911252	104277	373360	753717	994503	180080	208320	326393			272387	693256	935103	3662358		338281	993555	407051	1056268	770643	3024133		167925	312941		134092
138	tyramine	Amino Acid	Tyrosine Metabolism	1603	LC/MS Pos Early	1133	2540	138.091	60-19-5	5610	5408	C00483	HMDB00306	4033725	5964117	1515611	886255	876071	4690250	28784860		256990192	842100	7797795	1523160	1298482	11289980	1729492	1108547	8528515	577434	5879734	2008174	7339469	2126298	3722022	6517689	2449529	2204715	113236592	71547216	1046006	9637889	975689	8489093	367717	1056426	596759	2361616
132	tyrosine	Amino Acid	Tyrosine Metabolism	1299	LC/MS Pos Early	815	2430	182.081	60-18-4	6057	5833	C00082	HMDB00158	484436480	285117632	28418588	29979262	161414192	731810304	76400720	7321535	367567328	180884128	574795520	7015502	70863120	582918016	480272256	527197664	446441024	314570016	206212912	931983424	493278816	978604672	750591360	334145056	402576640	523220672	714603264	220856912	431750752	635980992	198800368	396426720	4482941	34191236	314096448	527166720
4161	tyrosol	Xenobiotics	Food Component/Plant	41515	LC/MS Neg	100003493	2716	137.061	501-94-0	10393	9964	C06044	HMDB04284	419218	193713	264031	150374	178064	619934	109191		438633	248740	461729	79932	100007	895680	219231	222764	408012	218560	339280	677507	539489	1038838	495463	517108	426376	254040	588759	545851	657263	329777	930433	316657		264359	512899	188567
800	tyrosylglycine	Peptide	Dipeptide	41375	LC/MS Neg	100003598	1635	237.088	673-05-5	259323	227627		HMDB29105	1281693	999227	234290	190564	628168	127981	676283	24318	3354177	2148389	4534583	40471	85056	561614	237727		129673		37373	197890	123976	265221	341323	737303		76712	100054	84893	253398	331002	1956850	46317	71214	313632	71993	31267
1329	undecanedioate (C11-DC)	Lipid	Fatty Acid, Dicarboxylate	42395	LC/MS Neg	100001617	2440	215.129	1852-04-6	15816	15037		HMDB00888	628068	156123	278608		1731296	620457	230741	94637	388181	951396	1302927			1149426	472956	2831682	3553116	2409273	641535	1297957	577961	1757006	740850	670712	1295064	529159	608309	820242	1247190	505236	886633	827530	172612	376309	1392955	966819
1170	undecanoate (11:0)	Lipid	Medium Chain Fatty Acid	12067	LC/MS Neg	889	5219.2	185.155	334-48-5	8180	7888	C17715	HMDB00947	3297673	5190723	5805183	4445659	3124760	5598499	3754437	2110990	3415916		5097279	3295657	3951879	4361098	2492969	6697235	16508338	4127773	10226462	6253865	2581405	3653108	4932808	2741323	8151865	4867865	5854784	22742476	23587590	10124008	2229497	8744203	2445991	483133	8392314	5395401
3479	uracil	Nucleotide	Pyrimidine Metabolism, Uracil containing	605	LC/MS Neg	825	1086	111.02	66-22-8	1174	1141	C00106	HMDB00300	16088259	4583289	1225830	703557	1921393	117615896	3808184	203064	22034776	5381675	12343302	482229	770594	187974272	39606324	53136980	100895248	58830272	43340880	112479224	43159724	102931568	43037416	13594964	78160304	79740000	81434368	45702656	45092704	33216876	9156381	94408048	100067	1832978	42792920	92733000
3396	urate	Nucleotide	Purine Metabolism, (Hypo)Xanthine/Inosine containing	1604	LC/MS Neg	1134	757.1	167.021	69-93-2;120K5305	1175		C00366	HMDB00289	7807454	9706237	778968	856487	2031020	3249661	3148164	257258	25776872	5479059	8680762	53364	1834489	3078541	1137619	5946955	2423092	3684540	1084593	7852017	9979090	2846062	5654685	126262	3905762	16089568	13604494	3420403	27775544	4485589	300576	4656561		1102428	12532834	1977690
3478	uridine	Nucleotide	Pyrimidine Metabolism, Uracil containing	606	LC/MS Neg	535	1457.6	243.062	58-96-8	6029	5807	C00299	HMDB00296	7062675	2089880	1036032	1906803	1347224	14180270	655045		10109409	3512115	1251381	1799753	475309	32010150	19436920	5564914	34016624	5188183	17493360	7428296	12175396	20504676	17346596	26204768	15518568	9448497	4814057	15526080	5247343	82370624	8094479	11755049	190471	1281938	4242001	23747144
3477	uridine-2',3'-cyclic monophosphate	Nucleotide	Pyrimidine Metabolism, Uracil containing	37137	LC/MS Neg	75	1090	305.018	40632-52-8	439715	3824355	C02355	HMDB11640	1024672		32307		52288	1346742				36362	321115	69344	81169	2434039	1128991	124353	1818346	129913	1089377		173213	1084028	258592	445692	299854	295390	277614	463445	189727	2609655	833436	345136		52689		4509385
4263	Urolithin A	Xenobiotics	Food Component/Plant	57787	LC/MS Neg	100015801	4107	227.035	1143-70-0	5488186	4589709		HMDB13695	22680	85727	191539		102745						1992023					1849194		11866909	391394	2609158			1877642		3017729		6544212				1038903	1085985	703092	339420	1540868
4316	Urolithin B	Xenobiotics	Bacterial/Fungal	57764	LC/MS Neg	100015802	4739	211.04	1139-83-9	5380406	4528673		HMDB13696		459342	1702806	143709			271561											7370947	1644153						2154240							378762
2820	ursocholate	Lipid	Secondary Bile Acid Metabolism	57573	LC/MS Neg	100002913	4648	407.28	2955-27-3					447382		93577			47467904	54305		193876		2120233			1976331	730356	820710	841813	398691	883568	812999	7445088	730053	885400	35178904	610877	2842720	1269977	1163050	683506	281951840	1049978	379558		124945	233552	166511
2789	ursodeoxycholate	Lipid	Secondary Bile Acid Metabolism	1605	LC/MS Neg	1135	5055	391.285	128-13-2	31401	29131	C07880	HMDB00946	7503976	469586	846499	8604958	922945	392464320	3171306	2194553	3366493	10328405	15678014	43360		18651716	4975431	940456	47840132	2674499	11408897	3526652	8645788	17564526	1437683	279313280	12104171	51082696	17436748	23970356	4515761	469657088	23750676	4639667	247900	528087	2890314	1846260
2817	ursodeoxycholate sulfate (1)	Lipid	Secondary Bile Acid Metabolism	52970	LC/MS Neg	100009261	4328	235.117																			100713				50468			12172566	67029	131920	116987			79652	57502	108063			42476		39710
4162	ursolic acid	Xenobiotics	Food Component/Plant	41654	LC/MS Neg	100003484	5595	455.353	77-52-1	64945	58472	C08988	HMDB02395	776173				1890506	21000242	185718				2111629			4310263	870234	7544409			301246	1922625	15364616	4433869			20050140		16533334	134746	581031	537615		4972078	6793101		11249165	1604897
1164	valerate (5:0)	Lipid	Short Chain Fatty Acid	33443	LC/MS Neg	1136	1718	101.061	109-52-4	7991	7701	C00803	HMDB00892	1565835	2011673	3577325	4087697	1941595	147838480	2663169	1173817	4115748	10952996	12366627	3538187	3902183	178626240	33666260	81951440	219692304	77103040	99573384	92617736	34570484	264421856	63942152	17574168	94804952	106622560	95838544	178999904	135822272	66977216	3719180	39981388	1303723	2688857	11210574	38064488
1419	valerylglycine	Lipid	Fatty Acid Metabolism(Acyl Glycine)	36768	LC/MS Neg	100001451	2071	158.082	24003-66-5	4737557	3924818		HMDB00927	281278	317473				1630786			216817	232828	256801			561202	380417	632763	2147406	1081264	537170	868582	543226	1252105	500504	259652		707102		922961	2174297	467506	257777	1173496		149482	1190699	298565
130	valerylphenylalanine	Amino Acid	Phenylalanine Metabolism	44577	LC/MS Neg	100004533	4176	248.129		13890536	14753835			1815217		302242		184077	286628	51533		179828		3474726			206319	486349	529266	2227878	258310	165767	3315719	529477	983461	571605	31169	1439232	961559	3311439		1281428	903490	37257	1248265			327463	1486331
314	valine	Amino Acid	Leucine, Isoleucine and Valine Metabolism	1649	LC/MS Pos Early	566	2479	118.086	72-18-4	6287	6050	C00183	HMDB00883	951243008	491857728	28695094	26881406	216155632	2730856192	113929808	4112154	430740416	157442576	1051686400	3663110	109080976	2154150656	1091916672	1830820096	1518460928	883504704	620517440	3983648256	1527199360	3166836736	1674698240	617726336	1714308864	1762064896	2355853312	691483136	1744472960	1790991872	200469504	1233559936	3997454	22302908	1015951616	1362878464
326	valine betaine	Amino Acid	Leucine, Isoleucine and Valine Metabolism	57686	LC/MS Neg	100015963	1370	220.119			13320269			140525	69522				449568			88874	117579				109300	59879	26828	151858		236691	214667	272242	427450			5244913	226296	538810	205431	75346	119688	89026	216786				183182
4524	valsartan	Xenobiotics	Drug - Cardiovascular	48566	LC/MS Pos Late	100006232	1092	436.234	137862-53-4	5650	5448				359901824
816	valylglutamine	Peptide	Dipeptide	42079	LC/MS Pos Early	100003640	2295	246.145	42854-54-6	5253209	4419671		HMDB29125	40999820	23127460	8430254	10907954	41977760	711205	32836342	1160617	45173248	51454164	93814904	1469277	5484858	3091897	3732020	293513	1170137	960072	782837	1166033	926632	3221053	7932265	10499217	798050	1004118	1625215	987431	1892920	4345921	31962708	565172	2450982	13033074	1240662	856668
817	valylglycine	Peptide	Dipeptide	40475	LC/MS Pos Early	100003641	2444	175.108	686-43-1	136487	120256		HMDB29127	95625480	29960692	4820750	5391827	31630108	7480838	18753564		67178520	33387490	126608992	503983	3438566	14380703	11374819		5108110	3328834	5317396	1276727	4650964	8222793	17682868	13236005	2041394	8677415	4831932	4414124	5698779	14863181	35027408	3153049	456414	9090233	919958	4875238
820	valylleucine	Peptide	Dipeptide	39994	LC/MS Pos Early	100003210	3138	231.17	22906-55-4	352039	312586		HMDB29131	51465428	42755900	5997320	10170340	67375264	8286938	66194792	4322974	91512624	107876512	198251056	4555152	3296669	10646372	16092120	1809351	4981445	5493655	4303858	2440494	6224637	10309194	20993516	37154264	3516595	6303118	4830888	6891356	8606362	14919252	83887936	4021727	7468913	26014344	3653709	4174736
3888	vanillate	Xenobiotics	Food Component/Plant	35639	LC/MS Neg	100001634	1100	167.035	121-34-6	8468	8155	C06672	HMDB00484	198062	523823	146711		264402	946878			1052683	165070	165090			973498	132622	215012	402650	367587	3629785	560588	322618	513221	264718	227052	1575547		471277	443542	207057	224350	316629	1727909		241029	322045	164359
3388	xanthine	Nucleotide	Purine Metabolism, (Hypo)Xanthine/Inosine containing	3147	LC/MS Pos Early	1004	1032	153.041	69-89-6	1188	1151	C00385	HMDB00292	165589648	11709397	9990362	5558007	25338204	708066688	30542424	1959080	229351264	73238216	140284176	4459600	8368001	1104849792	295878368	386271040	683617472	357955232	342325024	888639744	405523232	738400768	342893792	46076520	631342848	559317376	557233856	348800544	321405408	292235904	81486576	718881792	868312	24957376	334863168	568287296
3390	xanthosine	Nucleotide	Purine Metabolism, (Hypo)Xanthine/Inosine containing	15136	LC/MS Neg	100000299	1075	283.068	146-80-5	64959	58484	C01762	HMDB00299	312758					183590								433467	196336	234715	741854	216229	297884	232784	482490	231468	246244	371902	1653009	158098	104801	818589	68857	175263		1323310			83611	1712502
228	xanthurenate	Amino Acid	Tryptophan Metabolism	15679	LC/MS Pos Early	100000015	2236	206.045	59-007	5699	5497	C02470	HMDB00881				3688627	1509320	4258496	1717445		6226115	8570781		564864		7946460	1685654		3728290		1162646			4748717		6873381		1298878		5286217	1854946	1973363	1980087	2651336		84972	1625199
1489	ximenoylcarnitine (C26:1)*	Lipid	Fatty Acid Metabolism(Acyl Carnitine)	57517	LC/MS Pos Late	100015836	1607	538.483						1226221					2006995								1485194	44053	1356767	480265	230663	446746	367566	572713	522667	179970	349214	492077	226273	549973	612490	674099	420980	165240	130918			444997	116837
969	xylose	Carbohydrate	Pentose Metabolism	15581	LC/MS Polar	826	1727	195.051	609-06-3	135191	85957	C00181	HMDB00098	3530530	5345346		2512645	4915590	124274432	9075278	374361	21077392	2521496	5434296			94957088	36882436	5469302	7106368	26690592	39519608	2505702	103159352	62763656	7396687	3759210	4267614	39930616	10826152	5138451	5642929	19801548	11021681	17480516		1113606	2205932	16982212
[truncated: 6 more columns]

## Sheet: ScaledImpData
													SAMPLE_NAME	KARO-00419	KARO-00420	KARO-00421	KARO-00422	KARO-00423	KARO-00424	KARO-00425	KARO-00426	KARO-00427	KARO-00428	KARO-00429	KARO-00430	KARO-00431	KARO-00432	KARO-00433	KARO-00434	KARO-00435	KARO-00436	KARO-00437	KARO-00438	KARO-00439	KARO-00440	KARO-00441	KARO-00442	KARO-00443	KARO-00444	KARO-00445	KARO-00446	KARO-00447	KARO-00448	KARO-00449	KARO-00450	KARO-00451	KARO-00452	KARO-00453	KARO-00454
													SAMPLE_ID	4771208	4771209	4771210	4771211	4771212	4771213	4771214	4771215	4771216	4771217	4771218	4771219	4771220	4771221	4771222	4771223	4771224	4771225	4771226	4771227	4771228	4771229	4771230	4771231	4771232	4771233	4771234	4771235	4771236	4771237	4771238	4771239	4771240	4771241	4771242	4771243
													CLIENT_IDENTIFIER	MB_EC01_Faeces	MB_EC02_Faeces	MB_EC03_Faeces	MB_EC04_Faeces	MB_EC05_Faeces	MB_EC06_Faeces	MB_EC07_Faeces	MB_EC08_Faeces	MB_EC09_Faeces	MB_EC10_Faeces	MB_EC11_Faeces	MB_EC12_Faeces	MB_EC13_Faeces	MB_EC14_Faeces	MB_VP01_Faeces	MB_VP02_Faeces	MB_VP03_Faeces	MB_VP04_Faeces	MB_VP05_Faeces	MB_VP06_Faeces	MB_VP07_Faeces	MB_VP08_Faeces	MB_VP09_Faeces	MB_VP10_Faeces	MB_VP11_Faeces	MB_VP12_Faeces	MB_VP13_Faeces	MB_VP14_Faeces	MB_VP15_Faeces	MB_VP16_Faeces	MB_HC01_Faeces	MB_HC02_Faeces	MB_HC03_Faeces	MB_HC04_Faeces	MB_HC05_Faeces	MB_HC06_Faeces
													AGE	49	68	45	51	44	62	46	32	28	40	41	48	40	52	53	45	48	42	58	36	45	45	47	41	58	38	40	54	38	59	44	48	46	44	39	44
													BMI	26.3	25.7	22.1	25.7	19.4	26.5	38.2	32	32.8	23.9	29	24.5	32.3	35	29	30	27	24	23	25	24	23	34	28	21	32	24	33	23	36	22.9	23	20	23.9	19.7	26
													GENDER	M	M	M	M	F	M	F	F	F	F	F	M	F	M	M	F	M	M	M	M	M	F	F	M	M	M	F	F	F	F	F	M	F	F	F	M
													GROUP_DESCRIPTION	Elite Controller	Elite Controller	Elite Controller	Elite Controller	Elite Controller	Elite Controller	Elite Controller	Elite Controller	Elite Controller	Elite Controller	Elite Controller	Elite Controller	Elite Controller	Elite Controller	Viremic Progressor	Viremic Progressor	Viremic Progressor	Viremic Progressor	Viremic Progressor	Viremic Progressor	Viremic Progressor	Viremic Progressor	Viremic Progressor	Viremic Progressor	Viremic Progressor	Viremic Progressor	Viremic Progressor	Viremic Progressor	Viremic Progressor	Viremic Progressor	Healthy Control	Healthy Control	Healthy Control	Healthy Control	Healthy Control	Healthy Control
													GROUP_NUMBER	1	1	1	1	1	1	1	1	1	1	1	1	1	1	2	2	2	2	2	2	2	2	2	2	2	2	2	2	2	2	3	3	3	3	3	3
													RACE	Black	Caucasian	Caucasian	Caucasian	Black	Caucasian	Black	Black	Black	Black	Black	Latin	Black	Black	Caucasian	Caucasian	Latin	Black	Caucasian	Black	Caucasian	Black	Black	Black	Caucasian	Caucasian	Black	Black	Caucasian	Caucasian	Caucasian	Caucasian	Caucasian	Caucasian	Caucasian	Black
PATHWAY_SORTORDER	BIOCHEMICAL	SUPER_PATHWAY	SUB_PATHWAY	COMP_ID	PLATFORM	CHEMICAL_ID	RI	MASS	CAS	PUBCHEM	CHEMSPIDER	KEGG	Group HMDB_ID	EC	EC	EC	EC	EC	EC	EC	EC	EC	EC	EC	EC	EC	EC	VP	VP	VP	VP	VP	VP	VP	VP	VP	VP	VP	VP	VP	VP	VP	VP	HC	HC	HC	HC	HC	HC
1290	(12 or 13)-methylmyristate (a15:0 or i15:0)	Lipid	Fatty Acid, Branched	38293	LC/MS Neg	100002344	5499	241.217	2485-71-4	151014	133106			1.9933	0.1818	0.2143	0.1088	0.2659	1.8555	0.2363	0.093	3.975	1.0237	3.2205	0.0389	0.3396	3.5578	0.253	1.1121	1.6109	1.2633	0.561	3.0784	0.7913	0.3661	0.8439	0.1017	1.6507	0.9763	2.4541	1.4441	1.1226	0.1715	0.0957	1.7085	0.3765	0.1544	0.3833	1.0286
1293	(14 or 15)-methylpalmitate (a17:0 or i17:0)	Lipid	Fatty Acid, Branched	38768	LC/MS Neg	100002945	5695	269.249		17903417				6.5173	0.7276	0.0592	0.0592	0.8306	0.8177	0.2021	0.0592	0.0592	0.0592	0.0592	0.1612	1.4348	0.9817	0.2121	5.724	1.7287	3.2861	1.2434	4.365	0.4338	0.6653	0.9713	0.2487	4.0308	1.0183	7.5754	1.4625	1.1972	0.733	0.3462	3.0895	0.1961	0.0592	1.2258	2.2385
1296	(16 or 17)-methylstearate (a19:0 or i19:0)	Lipid	Fatty Acid, Branched	38296	LC/MS Neg	100002356	5993	297.28	2724-59-6	3083779	2340933		HMDB37397	0.7752	1.8513	1.1617	1.5261	0.581	0.6305	0.1736	0.1594	1.6301	6.1088	4.5	0.1575	1.1205	1.303	0.3983	6.4441	0.3439	1.5754	0.465	1.5421	0.2376	1.0586	1.5115	1.1881	0.6112	0.6401	2.3386	0.7704	0.3416	0.5202	0.5794	5.9708	0.4056	0.3228	1.478	0.9414
3539	(3'-5')-adenylyladenosine*	Nucleotide	Dinucleotide	62396	LC/MS Neg	100020723	2173	595.142		94231	85040			0.063	0.063	0.063	0.063	0.063	5.2183	0.063	0.063	0.063	0.063	0.5033	0.063	0.063	3.9012	2.3059	0.2443	1.1774	0.3037	1.5006	0.063	0.063	2.9828	0.063	1	0.1542	0.063	0.063	0.8741	0.6719	7.5487	4.0975	0.063	0.063	0.063	0.063	0.0681
3536	(3'-5')-adenylylcytidine	Nucleotide	Dinucleotide	52753	LC/MS Neg	100009062	1920	571.131	4833-63-0	10875494	9050769			0.2829	0.2829	0.2829	0.2829	0.2829	1.9356	0.2829	0.2829	0.2829	0.2829	0.2829	0.2829	0.2829	0.6293	0.4429	0.2829	1.454	0.2829	0.8324	0.2829	0.2829	1.3554	0.2829	0.4777	0.2829	0.2829	0.2829	0.2829	0.352	1.9984	1.3476	0.2829	0.2829	0.2829	0.2829	0.2829
3537	(3'-5')-adenylyluridine	Nucleotide	Dinucleotide	52740	LC/MS Neg	100009060	2002	572.115	3051-84-1	112074	100483			0.1017	0.1017	0.1017	0.1017	0.1017	3.6054	0.1017	0.1017	0.1017	0.173	0.2946	0.1017	0.1017	1.2585	1.545	0.2537	1.3796	0.3026	1.6114	0.1017	0.1017	4.039	0.1017	2.2151	0.1017	0.1017	0.1017	0.4396	0.4459	6.3584	2.7884	0.1017	0.1017	0.1017	0.1017	0.1017
3546	(3'-5')-cytidylylcytidine*	Nucleotide	Dinucleotide	62397	LC/MS Neg	100020727	1472	547.12		94237	85046			0.3813	0.3813	0.3813	0.3813	0.3813	1.0762	0.3813	0.3813	0.3813	0.3813	0.3813	0.3813	0.3813	0.3813	0.3813	0.3813	2.7123	0.3813	1.463	0.3813	0.3813	1.1439	0.3813	0.3891	0.9755	0.3813	0.3813	0.3813	0.3813	0.3813	1	0.3813	0.3813	0.3813	0.3813	0.3813
3547	(3'-5')-cytidylylguanosine	Nucleotide	Dinucleotide	52745	LC/MS Neg	100009063	1537	587.126	2382-65-2	65101	58611			0.2021	0.2021	0.2021	0.2021	0.2021	2.1386	0.2021	0.2021	0.2021	0.2021	0.2021	0.2021	0.2021	1.4107	0.5193	0.5892	5.6102	0.2021	2.6714	0.2021	0.3763	2.8704	0.2021	0.504	2.2269	0.2021	0.2021	0.2021	0.2021	0.4048	2.013	0.2021	0.2021	0.2021	0.2021	0.6054
3540	(3'-5')-cytidylyluridine*	Nucleotide	Dinucleotide	62399	LC/MS Neg	100020728	1522	548.104						0.1562	0.1562	0.1562	0.1562	0.1562	2.8435	0.1562	0.1562	0.1562	0.2095	0.4814	0.1562	0.1562	0.9688	0.7627	0.6228	2.8057	0.4935	1.9917	0.1562	0.6763	2.9141	0.1562	1.3058	1.3359	0.1562	0.1562	0.7791	1.0312	2.0018	1.4096	0.1562	0.1562	0.1562	0.1562	0.2905
3541	(3'-5')-guanylylcytidine	Nucleotide	Dinucleotide	52746	LC/MS Neg	100009064	1670	587.126	4785-04-0	107595	96791			0.2624	0.2624	0.2624	0.2624	0.2624	3.2122	0.2624	0.2624	0.2624	0.3855	0.2624	0.2624	0.2624	0.7808	1.1822	0.2624	0.8869	0.2624	1.1531	0.2624	0.2624	1.8776	0.2624	1.1131	0.2624	0.2624	0.2624	0.3948	0.4078	4.6798	2.6018	0.2624	0.2624	0.2624	0.2624	0.2705
3542	(3'-5')-guanylyluridine	Nucleotide	Dinucleotide	52743	LC/MS Neg	100009056	1772	588.11	4785-07-03		32821064			0.2033	0.2033	0.2033	0.2033	0.2033	2.3873	0.2033	0.2033	0.2033	0.3032	0.2033	0.2033	0.2033	0.6458	1	0.2033	0.2033	0.2033	0.6261	0.2033	0.2033	1.1119	0.2033	1.8205	0.2033	0.2033	0.2033	0.2462	0.2033	5.9976	2.014	0.2033	0.2033	0.2033	0.2033	0.2033
3543	(3'-5')-uridylylcytidine*	Nucleotide	Dinucleotide	62398	LC/MS Neg	100020729	1591	548.104						0.1348	0.1348	0.1348	0.1348	0.1348	1.3237	0.1348	0.1348	0.1348	0.1348	0.1348	0.1348	0.1348	0.1348	0.1348	0.2536	1.9857	0.1348	1	0.1348	0.1348	1.2427	0.1348	0.6778	0.782	0.1348	0.1348	0.1348	0.3044	0.1348	1.2357	0.1348	0.1348	0.1348	0.1348	0.1646
3544	(3'-5')-uridylylguanosine	Nucleotide	Dinucleotide	52742	LC/MS Neg	100009057	1637	588.11	3474-04-02	107394	96654			0.4576	0.4576	0.4576	0.4576	0.4576	2.077	0.4576	0.4576	0.4576	0.4576	0.4576	0.4576	0.4576	1.1556	0.5322	0.6706	3.6745	0.5857	1.9759	0.4576	0.4576	2.0768	0.4576	0.8355	1.5158	0.4576	0.4576	0.4576	0.4576	0.6073	1.8001	0.4576	0.4576	0.4576	0.4576	0.5122
3538	(3'-5')-uridylyluridine	Nucleotide	Dinucleotide	52741	LC/MS Neg	100009058	1688	549.088	2415-43-2	102258	92384			0.1771	0.1771	0.1771	0.1771	0.1771	2.9566	0.1771	0.1771	0.4796	0.3165	0.1771	0.1771	0.1771	0.6728	1.3662	1.0052	1.6305	0.6047	1.3474	0.1771	0.7836	3.934	0.1771	2.9299	0.9278	0.1771	0.1771	0.4816	0.9948	2.7327	2.0678	0.1771	0.1771	0.1771	0.1771	0.2343
174	(R)-salsolinol	Amino Acid	Tyrosine Metabolism	38665	LC/MS Pos Early	100002814	2525	180.102	70681-20-8	54456	49181	C09642	HMDB05199	0.2434	0.0929	0.0929	0.0929	0.3973	1.2177	0.0929	0.0929	0.7272	0.0929	0.4629	0.0929	0.0929	0.0929	1.6429	0.0929	1.4223	8.6615	1.793	0.5552	1.1578	20.5558	0.0929	0.1435	1.1524	0.0929	0.2261	1.0564	0.0929	0.0929	0.0929	1.315	0.0929	0.6344	1.2405	0.0929
4238	1,2-dilinolenoyl-digalactosylglycerol (18:3/18:3)	Xenobiotics	Food Component/Plant	54892	LC/MS Pos Late	100009392	1941	954.615						0.3139	0.3139	0.3139	0.3139	0.3139	0.3139	0.3139	0.3139	0.3139	0.3139	0.3139	0.3139	0.3139	0.507	0.3139	0.3139	1.4421	0.3636	0.3139	0.3139	0.3139	0.3139	0.3139	0.3139	0.3139	0.3139	0.3139	0.3139	0.3139	0.3139	0.3139	2.1742	0.3139	0.3139	0.3139	1.3061
2229	1,2-dilinolenoyl-galactosylglycerol (18:3/18:3)*	Lipid	Glycolipid Metabolism	54891	LC/MS Pos Late	100010877	2046	792.562		5282287	4445458	C13871		0.476	0.476	0.476	0.476	0.476	1.2909	0.476	0.476	0.476	0.476	0.476	0.476	0.476	2.5013	0.476	0.476	7.1754	0.476	0.4889	0.476	0.476	0.476	0.476	0.476	0.476	0.476	0.476	0.5976	0.476	0.476	0.476	1.9615	0.476	0.476	0.476	0.7091
2225	1,2-dilinoleoyl-digalactosylglycerol (18:2/18:2)*	Lipid	Glycolipid Metabolism	54897	LC/MS Pos Late	100010873	2256	958.646			24785309			0.2155	0.2155	0.2155	0.2155	0.2155	2.2197	0.2155	0.2155	0.2155	0.2155	0.2155	0.2155	0.2155	1.2674	0.2597	1.9163	2.2175	1.2107	2.948	0.2155	0.4795	0.7061	0.2155	0.2155	0.7893	0.2155	0.2155	0.2155	0.2155	0.3554	0.527	1.956	0.2155	0.5824	0.6047	0.28
2226	1,2-dilinoleoyl-galactosylglycerol (18:2/18:2)*	Lipid	Glycolipid Metabolism	54899	LC/MS Pos Late	100010879	2415	796.593		6535011	5019375			0.1613	0.1613	0.1613	0.1613	0.1613	1.0225	0.1613	0.1613	0.1613	0.1613	0.1613	0.1613	0.1613	0.9826	0.1613	0.7418	1.2654	1.311	1.3411	0.1613	0.1613	0.8521	0.1613	0.1613	0.1613	0.1613	0.1613	0.3047	0.1613	0.1613	0.1613	0.8964	0.1613	0.1613	0.2273	0.1613
1854	1,2-dilinoleoyl-GPC (18:2/18:2)	Lipid	Phosphatidylcholine (PC)	52603	LC/MS Pos Late	100008903	2006	782.569	998-06-1	5288075	4450312		HMDB08138	0.6227	0.2025	0.2025	0.2025	0.2025	3.1019	0.2025	0.2025	0.2025	0.2025	0.2025	0.2025	0.2025	1.0688	0.2025	0.6961	1.2262	2.8342	0.6104	0.4096	0.2025	0.2025	0.2025	0.2025	0.5099	1.1091	0.6938	0.2025	0.7758	0.2025	0.2025	16.7562	0.2025	1.8273	0.2719	0.2025
3785	1,3,7-trimethylurate	Xenobiotics	Xanthine Metabolism	34404	LC/MS Pos Early	100001397	1955	211.083	5415-44-1	79437	71754	C16361	HMDB02123	2.0499	0.3299	0.1054	0.1054	3.4761	0.3277	0.1536	0.1054	0.1506	0.274	1.4431	0.6732	1.2976	0.1054	0.6573	0.1054	3.8305	4.5644	2.7116	0.1054	0.6648	0.1054	0.1054	0.1054	2.1164	0.3008	7.0887	2.9714	30.0506	0.7024	4.9832	0.3031	0.1054	5.6207	10.9909	2.5004
3782	1,3-dimethylurate	Xenobiotics	Xanthine Metabolism	32391	LC/MS Neg	100001106	1671.4	195.052	944-73-0	70346	63527		HMDB01857	0.1953	0.8492	0.4452	1.006	0.5401	4.1399	0.1565	0.1192	0.3824	1.8969	0.5922	0.2607	0.2556	0.953	2.0239	0.8872	3.9802	1.957	3.2064	0.4199	1.4098	0.1192	0.2711	0.975	3.8001	1.8351	0.994	1.0732	4.9409	6.2496	0.9505	1.298	0.1192	0.5125	1.9199	1.5171
4741	1,3-propanediol	Xenobiotics	Chemical	45434	LC/MS Pos Early	100001175	832	77.0597	504-63-2	10442	13839553	C02457		0.315	0.315	0.315	0.315	1.0514	3.784	0.8494	0.315	1.5663	0.8995	0.951	0.315	0.5618	1.0478	0.315	0.315	0.315	0.315	0.315	0.315	0.315	1.6586	0.315	0.5955	3.4046	0.315	0.9522	0.5877	0.315	1.0687	3.6107	0.5459	0.4801	0.315	0.315	0.315
3783	1,7-dimethylurate	Xenobiotics	Xanthine Metabolism	34400	LC/MS Neg	100001399	1578.6	195.052	33868-03-0	91611	82720	C16356	HMDB11103	0.0143	1.5223	1.0988	1	0.099	7.9957	0.2203	0.0044	1.5061	2.5022	0.137	0.0044	0.0044	1.8314	5.6558	0.0044	1.0387	0.016	0.6449	0.0044	10.093	1.2247	0.5936	1.4361	0.1803	7.9459	0.1537	0.1514	0.0254	10.361	0.5904	1.3487	0.2348	0.0091	6.8142	0.9772
2284	1-(1-enyl-oleoyl)-GPE (P-18:1)*	Lipid	Lysoplasmalogen	44621	LC/MS Pos Late	100005372	1566	464.314						0.4465	0.174	0.3426	0.174	1.9992	15.7273	0.174	0.174	1.9088	7.7738	1	0.174	0.174	4.8602	0.2149	1.9997	3.9918	0.3102	4.5207	3.0727	0.9239	5.6999	0.174	1.0327	2.3289	0.2412	0.7718	6.217	0.5384	0.174	0.174	0.4544	0.174	0.174	0.8296	0.7642
2256	1-(1-enyl-palmitoyl)-2-oleoyl-GPC (P-16:0/18:1)*	Lipid	Plasmalogen	52478	LC/MS Pos Late	100009007	2443	744.59						0.1644	0.1644	0.1644	0.1644	0.1644	1.1101	0.1644	0.1644	0.1644	0.1644	0.4817	0.1644	0.1644	2.9819	0.1644	4.2815	1.0619	1.2016	3.3367	0.4481	0.8472	0.1644	0.1644	1.1121	0.1644	0.1644	0.9381	0.1644	0.1644	0.1644	0.1644	0.1644	0.1644	0.1644	0.1644	0.2694
2250	1-(1-enyl-palmitoyl)-2-oleoyl-GPE (P-16:0/18:1)*	Lipid	Plasmalogen	52477	LC/MS Pos Late	100009005	2600	702.543			24769228		HMDB11342	0.1417	0.1417	0.5029	0.4166	0.5893	0.1417	3.2175	0.1417	0.1417	0.4055	1.8312	1.4797	2.6155	0.1417	0.1417	2.1827	1.2277	1.0749	1.2538	1.3541	0.3919	0.4836	0.1417	0.1417	0.1417	0.1417	0.1417	0.1417	0.1417	0.1417	0.1417	0.8433	0.1417	0.1417	0.1417	0.9251
2282	1-(1-enyl-palmitoyl)-GPE (P-16:0)*	Lipid	Lysoplasmalogen	39270	LC/MS Pos Late	100003000	1558	438.298			10471193			0.7828	0.2289	0.5821	0.2289	0.8193	13.4976	0.2289	0.2289	33.406	17.8756	2.9784	0.2289	0.2289	5.2728	0.2289	0.5374	6.624	0.4547	8.293	6.1145	1.1387	2.213	0.2289	1.7507	3.4724	0.9004	0.3159	6.3634	1.0878	0.2289	0.2289	0.8405	0.2289	0.2289	0.4279	0.7692
2286	1-(1-enyl-stearoyl)-GPE (P-18:0)*	Lipid	Lysoplasmalogen	39271	LC/MS Pos Late	100003001	1649	466.329						0.4991	0.062	0.062	1.295	0.5633	1.5179	0.062	0.062	1.3651	0.7244	2.62	0.062	0.062	6.4491	0.062	1.6747	1.9664	0.6982	17.2804	1.3159	3.1395	2.301	0.4361	3.6706	1.1587	0.3998	0.2251	0.5683	2.4417	0.062	0.2023	0.7857	0.062	0.228	0.6101	0.8413
259	1-carboxyethylleucine	Amino Acid	Leucine, Isoleucine and Valine Metabolism	62559	LC/MS Neg	100020425	2663	202.108						0.446	0.1363	0.1363	0.1363	0.1363	1.2845	0.1363	0.1363	0.1363	0.1363	1.1002	0.1363	0.1363	0.6753	0.4875	0.1363	2.1963	0.4439	0.9006	1.0684	1	0.3461	0.1363	0.2283	1.9324	0.3255	2.0143	1.1357	3.5797	1.5905	0.229	1.4627	0.1363	0.1363	1.9481	0.1363
118	1-carboxyethylphenylalanine	Amino Acid	Phenylalanine Metabolism	62566	LC/MS Neg	100020419	2844	236.093			19276386			0.6274	0.1434	0.1434	0.1434	0.3104	2.2327	0.1434	0.1434	0.249	0.4754	0.6711	0.1434	0.1434	1	1.2692	0.3229	2.3553	0.4508	0.1434	0.1434	0.8652	0.1434	0.3489	0.1619	0.1434	0.1434	1.6283	2.1971	4.693	2.0329	0.5491	0.1434	0.1434	0.1434	2.3394	0.1434
316	1-carboxyethylvaline	Amino Acid	Leucine, Isoleucine and Valine Metabolism	62562	LC/MS Neg	100020423	2008	188.093						0.5201	0.3824	0.3824	0.3824	0.3824	1.5803	0.3824	0.3824	0.3824	0.3824	1.1384	0.3824	0.3824	1.1844	0.5663	0.3824	1.2256	0.3824	0.8238	0.9778	0.3824	0.3824	0.3824	0.5469	0.9973	0.6486	6.3836	0.662	1.7426	1.6476	0.3824	1.0014	0.3824	0.3824	1.3492	0.3824
2305	1-linolenoylglycerol (18:3)	Lipid	Monoacylglycerol	34393	LC/MS Neg	100001435	6214	277.217	124151-74-2	53480978	21403134		HMDB11569	0.2744	0.5298	0.2744	0.2744	0.7584	1.7436	0.2744	0.2744	0.2744	0.2744	0.2744	0.2744	0.2744	1.3089	0.2744	0.3393	0.2744	1.6723	0.8653	0.2744	0.7381	0.2744	0.2744	0.2824	0.7881	1.3944	0.2744	0.2744	0.2744	78.7358	1.2091	3.0627	0.2744	1	0.2872	1.0581
2228	1-linoleoyl-2-linolenoyl-digalactosylglycerol (18:2/18:3)*	Lipid	Glycolipid Metabolism	54896	LC/MS Pos Late	100010872	2073	956.63			24785583			0.4594	0.4594	0.4594	0.4594	0.4594	0.4594	0.4594	0.4594	0.4594	0.4594	0.4594	0.4594	0.4594	0.5637	0.4594	0.4594	0.7838	0.4594	1.6636	0.4594	0.4594	0.4594	0.4594	0.4594	0.4594	0.4594	0.4594	0.4594	0.4594	0.4594	0.4594	1.0292	0.4594	0.4594	0.4594	0.4594
2068	1-linoleoyl-GPC (18:2)	Lipid	Lysophospholipid	34419	LC/MS Pos Late	100001395	1465	520.34		11988421	10160888	C04100	HMDB10386	0.2397	0.2397	0.2397	0.2397	0.2397	7.2722	0.2397	0.2397	0.2397	0.2397	0.2397	0.2397	0.2397	2.9527	0.2397	0.2397	0.2397	2.6667	1.8044	0.2864	0.4415	0.3594	0.2397	0.9382	1.0618	0.5681	0.4838	0.3473	1.2033	0.295	0.4297	2.4797	0.2397	0.2397	1.2218	0.426
2304	1-linoleoylglycerol (18:2)	Lipid	Monoacylglycerol	27447	LC/MS Neg	100001040	6477	279.233	2277-28-3	5283469	4446589			0.4098	1.0726	3.3388	1.1163	0.5601	1.4939	1.2748	0.0693	1.656	1.7871	0.5773	0.1146	0.2621	1.8636	0.1789	0.1259	1.2477	0.6909	1.6007	0.3484	1.5761	0.2698	0.506	17.2084	0.9734	3.9345	0.2535	0.2339	0.0483	151.331	2.7432	4.1274	0.0483	2.0864	0.6138	0.7225
2301	1-margaroylglycerol (17:0)	Lipid	Monoacylglycerol	34391	LC/MS Neg	100001429	6571	269.249	68002-72-2	107036	96316			0.7351	1.3496	1.2034	1.0193	0.9806	0.5836	1.2005	1.4454	1.1241	1.1527	1.3557	1.0978	1.2612	1.1801	1.0075	0.9925	0.5417	0.8139	0.6399	1.1994	0.4476	0.5464	0.8329	0.5241	0.4605	0.7774	0.7122	0.7243	0.3854	0.5631	0.5944	0.8579	1.174	1.2571	1.2066	1.3018
83	1-methyl-4-imidazoleacetate	Amino Acid	Histidine Metabolism	32350	LC/MS Pos Early	100001208	2064	141.066	2625-49-2	75810	68319	C05828	HMDB02820	2.4297	0.0217	0.3028	0.0866	0.0217	0.9379	0.0217	0.0217	0.47	0.277	1.9732	0.0384	0.0217	1.671	0.2849	3.0801	2.1931	2.6968	1.3983	1.0621	0.7297	1.1209	0.5635	0.3727	6.7802	0.8892	5.3452	1.8073	2.361	0.3146	0.0217	0.7541	0.0217	0.0217	0.83	1.1569
3867	1-methyl-beta-carboline-3-carboxylic acid	Xenobiotics	Food Component/Plant	43449	LC/MS Neg	100004434	3190	225.067	22329-38-0	5406157	4546099			1.1897	0.125	0.125	0.125	0.125	0.4162	0.125	0.125	0.125	0.125	0.6449	0.187	0.125	0.4586	0.3547	41.0219	1.6481	87.5323	145.374	0.8499	0.4802	1.0735	0.6519	0.125	374.589	0.8435	0.8571	0.4592	1.7994	0.9265	0.125	107.098	15.3901	0.3106	1.1444	25.673
3413	1-methyladenine	Nucleotide	Purine Metabolism, Adenine containing	1527	LC/MS Pos Early	54	2133	150.077	5142-22-3	78821	71157	C02216	HMDB11599	0.8223	0.1233	0.0149	0.0086	0.0086	8.3316	0.0851	0.0086	0.8835	0.4191	0.5621	0.0086	0.0086	13.4902	1.1273	0.8407	1.458	1.4252	0.9343	2.3686	0.6168	3.4729	1.2449	0.293	1	1.4992	1.2531	0.6287	0.6977	1.0871	0.4431	1.5759	0.0086	0.0086	1.395	0.9345
428	1-methylguanidine	Amino Acid	Guanidino and Acetamido Metabolism	48114	LC/MS Pos Early	100000715	2149	74.0713	22661-87-6	10111	28576	C02294	HMDB01522	2.0838	0.2172	0.2172	0.2172	0.2172	0.9932	0.2172	0.2172	3.2152	0.2172	1.4125	0.2172	1.0493	0.7137	1.3561	1.7537	0.9716	2.0734	0.6569	1.3572	0.9213	1.6305	0.9004	1.7562	0.6712	0.9253	1.9908	1	1.0318	0.9376	0.3141	0.7742	0.2172	0.2172	0.5433	0.3197
82	1-methylhistamine	Amino Acid	Histidine Metabolism	43831	LC/MS Pos Early	100001204	3040	126.103	501-75-7	3614	3488	C05127	HMDB00898	0.2734	0.1085	0.1085	0.1085	0.1503	2.983	1	0.1085	6.7041	0.1085	4.8661	0.1085	0.1085	37.9515	0.1784	0.1085	33.7604	0.6269	6.3016	0.1085	0.2065	0.7103	0.6339	18.0782	5.784	0.7813	6.5323	12.9592	0.1085	0.568	0.1085	0.1085	0.1085	0.1085	0.1085	2.4966
3401	1-methylhypoxanthine	Nucleotide	Purine Metabolism, (Hypo)Xanthine/Inosine containing	57771	LC/MS Pos Early	100004644	1530	151.061	1125-39-9	70765	63930			0.0195	0.0195	0.0195	0.0195	0.0195	0.9124	0.0195	0.0195	0.0195	0.0195	0.0195	0.0195	0.0195	2.4488	0.1205	0.0329	0.0195	0.0195	0.0195	0.0657	0.5707	2.7726	1	1.6031	0.0195	1.5188	0.0195	0.0195	0.0195	1.2273	0.0195	0.0195	0.0195	0.0195	0.0195	0.0195
3565	1-methylnicotinamide	Cofactors and Vitamins	Nicotinate and Nicotinamide Metabolism	27665	LC/MS Pos Early	55	1940	137.071	1005-24-9	10129985	8305504	C02918	HMDB00699	0.3132	0.1232	0.1232	1.5681	0.3469	4.5591	0.1232	0.1232	0.2421	0.8884	0.1232	0.1232	0.1232	6.2898	12.3827	0.5113	0.1232	0.1232	0.3845	2.6165	7.1768	0.1232	2.9027	5.6167	8.9157	12.1453	0.1232	0.9899	1.1213	14.0252	0.2855	0.1809	0.1232	0.1232	0.663	0.1232
3780	1-methylurate	Xenobiotics	Xanthine Metabolism	34395	LC/MS Pos Early	100001400	1461	183.051	708-79-2	69726	62926	C16359	HMDB03099	0.0821	0.0821	0.0821	1	0.0821	3.6655	0.0821	0.0821	0.7671	1.0114	0.0821	0.0821	0.0821	1.7127	0.2974	0.0821	0.0821	0.0821	0.0821	0.0821	2.2288	0.0821	0.1272	0.0821	0.0821	1.5161	0.0821	0.0821	0.0821	1.8277	0.0821	0.0821	0.0821	0.0821	0.0821	0.0821
3786	1-methylxanthine	Xenobiotics	Xanthine Metabolism	34389	LC/MS Neg	100001405	1568.8	165.042	6136-37-4	80220	72464	C16358	HMDB10738	0.3389	0.1439	0.1896	9.5903	0.4547	69.1339	0.1439	0.1906	11.6847	25.5913	0.6818	0.1439	0.1439	28.3243	24.4465	0.6668	0.3291	0.3367	0.24	1.3247	51.9877	25.6148	13.8855	25.8601	0.6731	77.5008	0.7839	0.1439	0.1439	184.582	0.1439	1.037	0.1439	0.1439	0.963	0.5441
2296	1-myristoylglycerol (14:0)	Lipid	Monoacylglycerol	35625	LC/MS Neg	100001618	6353.3	227.202	75685-84-6	79050	71382	C01885	HMDB11561	0.9522	1.0834	1.4053	0.673	1.5032	0.7875	1.5902	1.9294	1.1445	0.9773	0.4932	1.9627	1.2772	1.3909	1.1928	1.4998	0.5678	0.5719	0.7689	0.6949	0.7347	0.6998	0.834	0.6628	0.4932	0.7937	0.7903	0.5413	0.7178	3.9933	1.311	1.1293	1.1471	0.9779	2.3204	1.3569
1843	1-oleoyl-2-linoleoyl-GPC (18:1/18:2)*	Lipid	Phosphatidylcholine (PC)	52453	LC/MS Pos Late	100008981	2165	784.585						0.2059	0.2059	0.478	0.4426	0.2059	2.4168	0.2059	0.2059	0.2059	0.2059	0.2181	0.2059	0.2059	0.8964	0.2059	1.1225	2.8289	1.7544	1.3738	0.483	0.4636	0.2838	0.2059	0.2059	0.6565	1.1528	0.8677	0.2314	2.6956	0.2059	0.2514	11.1287	0.2059	1.6324	1	0.2369
2065	1-oleoyl-GPC (18:1)	Lipid	Lysophospholipid	48258	LC/MS Pos Late	100001272	1540	522.355	19420-56-5	16081932	17240641		HMDB02815	0.0906	0.0906	0.5955	0.319	0.0906	4.2938	0.0906	0.0906	0.0906	0.0906	0.0906	0.0906	0.0906	1.2661	0.1751	0.0906	3.6135	0.6573	1.5682	0.0936	0.2777	0.0906	0.0906	1.1878	1.517	1	0.1644	0.0906	1.4266	0.213	0.9394	1.2748	0.0906	0.0906	2.8303	0.2321
2112	1-oleoyl-GPE (18:1)	Lipid	Lysophospholipid	35628	LC/MS Pos Late	100001569	1554	480.308	89576-29-4	9547071	7826021		HMDB11506	0.2603	0.7346	1.229	1.4331	1.2212	1.038	0.1333	0.618	1	2.9442	0.1333	0.1333	0.9936	1.4677	0.1333	5.2478	2.9051	0.8205	2.8397	1.7352	0.926	1.3311	0.1557	1.8253	2.1443	0.1466	0.1999	1.5929	0.5851	0.1808	2.3015	1.4273	0.1333	0.8487	0.5916	0.3358
2303	1-oleoylglycerol (18:1)	Lipid	Monoacylglycerol	21184	LC/MS Neg	100000924	6650	281.249	111-03-5	5283468	4446588		HMDB11567	0.6391	0.8925	2.0754	0.9567	0.8117	6.0055	0.9273	0.5743	1.8238	1.5956	1.1656	0.7752	0.9992	1.5967	0.6401	0.8072	1.623	0.6874	1.009	0.9206	1.0008	0.9596	0.6379	1.141	0.7558	3.6291	0.6719	0.5524	0.2874	79.9921	3.7871	1.2739	0.5245	1.2986	1.3124	2.2916
4239	1-palmitoyl-2-linolenoyl-digalactosylglycerol (16:0/18:3)	Xenobiotics	Food Component/Plant	54893	LC/MS Pos Late	100010875	2278	932.63			24785524			0.2369	0.2369	0.2369	0.2369	0.2369	0.6872	0.2369	0.2369	0.2369	0.2369	0.2369	0.2369	0.2369	1.1356	1	0.2369	1.6628	0.2369	0.2369	0.2369	0.604	0.2369	0.2369	0.2369	0.2369	0.2369	0.2369	0.2369	0.2369	0.2369	0.2369	1.0701	0.2369	0.2369	4.8649	0.2369
2219	1-palmitoyl-2-linoleoyl-digalactosylglycerol (16:0/18:2)*	Lipid	Glycolipid Metabolism	54887	LC/MS Pos Late	100010874	2498	934.646			24785221			0.1923	0.1923	0.1923	0.1923	0.1923	1.6389	0.1923	0.1923	0.1923	0.1923	0.1923	0.1923	0.1923	3.4217	1.3668	2.3584	1.4424	0.8772	1.3561	0.3274	1.3969	0.9548	0.1923	0.9634	0.1923	0.1923	0.6778	0.1997	0.1923	0.6001	0.5016	1.3033	0.1923	0.3615	0.6523	0.2236
2220	1-palmitoyl-2-linoleoyl-galactosylglycerol (16:0/18:2)*	Lipid	Glycolipid Metabolism	54901	LC/MS Pos Late	100010893	2731	772.593			23326991			0.2491	0.2491	0.2491	0.2491	0.2491	1.7185	0.2491	0.2491	0.4158	0.2491	0.2741	0.2491	0.2491	8.0283	0.2491	0.9702	0.2491	0.4092	1.2386	1.3318	1.9443	6.5492	0.9205	0.7997	0.2491	0.2491	0.9504	0.2491	0.7939	0.2491	0.2491	2.3716	0.2491	0.2491	5.4632	0.5081
1901	1-palmitoyl-2-linoleoyl-GPE (16:0/18:2)	Lipid	Phosphatidylethanolamine (PE)	42449	LC/MS Pos Late	100001870	2275	716.522		9546747	7825697		HMDB05322	0.1878	0.1878	0.1878	0.1878	0.1878	0.1878	5.1933	0.1878	0.1878	0.1878	0.574	1.4522	0.7765	0.1878	0.1878	5.049	0.1878	1	0.1878	0.4328	0.1878	0.1878	0.1878	0.1878	0.1878	0.1878	0.1878	0.1878	0.1878	0.1878	0.5356	2.4493	0.6058	1.1499	0.1878	0.1878
1784	1-palmitoyl-2-oleoyl-GPC (16:0/18:1)	Lipid	Phosphatidylcholine (PC)	52461	LC/MS Pos Late	1539	2358	760.585	26853-31-6;26853-31-6	6436017	4940699		HMDB07972	0.3577	0.458	0.9145	1.7941	0.246	4.7775	0.213	0.1155	0.234	0.1583	1.497	0.5495	1.0855	1.5385	0.1377	3.602	5.574	3.5577	7.0996	0.8385	1.9161	0.7288	0.273	1.8163	0.3661	0.7636	2.4848	0.385	2.6768	0.3251	0.4053	2.7496	0.2263	0.8354	2.7182	0.6711
1900	1-palmitoyl-2-oleoyl-GPE (16:0/18:1)	Lipid	Phosphatidylethanolamine (PE)	19263	LC/MS Pos Late	1526	2509	718.538	26662-94-2	5283496	4446615		HMDB05320	0.2154	0.0932	1.113	1.0105	0.0705	0.0705	15.6368	0.0705	0.1986	0.4076	1.4684	2.5839	6.5963	0.0705	0.0705	4.5101	0.0705	0.9523	0.2429	1.1664	0.0705	0.0705	0.0705	0.0705	0.0705	0.1117	0.0705	0.0705	0.0705	0.0705	1.0771	1.8191	0.8059	0.9895	0.0705	0.3047
1782	1-palmitoyl-2-stearoyl-GPC (16:0/18:0)	Lipid	Phosphatidylcholine (PC)	52616	LC/MS Pos Late	100008921	2653	762.601	59403-51-9		24766643		HMDB07970	0.2917	0.2917	0.2917	0.2917	0.2917	0.2917	0.2917	0.2917	0.2917	0.2917	0.2917	0.2917	1.0408	0.7166	0.2917	1.7086	1.0895	1.1091	1	0.2917	0.2917	0.2917	0.2917	1.7558	0.2917	0.2917	0.4792	0.2917	0.2917	0.2917	0.2917	0.2917	0.2917	0.2917	0.2917	0.3609
2234	1-palmitoyl-galactosylglycerol (16:0)*	Lipid	Glycolipid Metabolism	62372	LC/MS Neg	100010885	6161	491.323		10413348	8588782			0.1235	0.9558	0.1235	0.1235	0.3454	0.6356	0.2096	0.2707	1.4561	0.2863	0.1235	0.1235	0.8813	3.8037	1.2658	0.5065	0.1235	0.7214	1.4248	2.0741	1.0442	5.7313	2.7405	2.4151	0.6349	0.2348	0.1235	0.8187	0.2763	4.9293	0.1235	1.909	0.1235	0.5441	1.95	1.0939
2055	1-palmitoyl-GPC (16:0)	Lipid	Lysophospholipid	33955	LC/MS Pos Late	100001263	1525	496.34	17364-16-8	86554	78064		HMDB10382	0.5358	0.5821	0.4226	0.7703	0.275	11.7234	0.1255	0.1384	0.1391	0.1591	0.9299	0.1676	0.2481	5.4745	0.2221	0.7472	10.7739	1	7.413	0.3263	1.4368	2.2257	0.1715	18.5248	2.9448	3.488	0.5226	2.6846	5.1924	1.1326	1.6448	1.1187	0.1255	0.1967	3.7553	0.342
2103	1-palmitoyl-GPE (16:0)	Lipid	Lysophospholipid	35631	LC/MS Pos Late	100001567	1544	454.293	53862-35-4	9547069	7826019		HMDB11503	0.3703	1.078	2.1084	0.4189	1.2066	2.0934	0.3808	0.7056	1.3922	5.054	1.1652	0.1073	0.2965	3.7591	0.0371	1.4903	1.3984	0.3932	1.4785	0.991	2.0732	0.8378	0.2591	1.608	1.7146	2.1326	0.1493	3.3238	0.7844	0.2397	1.8926	1	0.0371	1.3343	0.3993	0.1934
2141	1-palmitoyl-GPG (16:0)*	Lipid	Lysophospholipid	45970	LC/MS Pos Late	100005717	1617	485.287		3300276	2548639			0.7677	0.3964	0.3964	0.3964	0.5848	0.8469	0.3964	0.3964	1.8751	0.3964	0.3964	0.3964	0.3964	1.9556	0.3964	0.5857	1.1906	1.5682	5.8202	0.3964	0.8559	1.9657	0.7828	4.9581	0.8633	0.5026	0.3964	1.4304	0.6313	1.3292	0.9974	2.0247	0.3964	0.3964	1.8974	0.7185
2148	1-palmitoyl-GPI (16:0)	Lipid	Lysophospholipid	35305	LC/MS Neg	100001655	5564	571.289					HMDB61695	0.2452	0.2452	0.2452	0.2452	0.2452	10.111	0.2452	0.2452	0.2452	0.2452	0.2452	0.2452	0.2452	4.5074	0.2452	0.2452	0.2452	0.2452	2.5065	1.6845	0.554	0.2452	0.3548	2.0582	0.8856	0.2452	0.2452	0.9959	0.4868	1.0041	0.2452	3.1014	0.2452	0.2452	0.5517	0.4249
2134	1-palmitoyl-GPS (16:0)*	Lipid	Lysophospholipid	46130	LC/MS Pos Late	100005805	1551	498.283		9547100	7826050			0.1434	0.1434	0.1434	0.1434	0.1434	2.2344	0.1434	0.1434	1.073	1.4143	0.1434	0.1434	0.1434	10.0561	0.1434	0.1434	0.1434	1	1.9354	0.1434	0.1559	0.1434	0.1434	1.4469	0.1434	0.2634	0.1434	0.1434	0.1434	0.1434	0.1434	0.2996	0.1434	0.1434	0.1434	0.1434
2299	1-palmitoylglycerol (16:0)	Lipid	Monoacylglycerol	21127	LC/MS Neg	100000827	6550	255.233	542-44-9	14900	14201		HMDB31074	0.7913	1.1854	1.1189	1.1216	1.1287	0.5959	1.1373	1.1741	1.1875	1.1669	1.238	1.2973	1.2086	1.0077	0.9915	1.0763	0.3226	0.7342	0.6374	1.1592	0.5166	0.6072	0.9186	0.5716	0.498	0.4452	0.8336	0.4959	0.4523	0.5542	0.6989	0.9412	1.0027	1.3332	0.9973	1.4185
2298	1-pentadecanoylglycerol (15:0)	Lipid	Monoacylglycerol	47898	LC/MS Neg	100001431	6200	241.217	104140-07-0	190750	165667			0.672	1.3205	1.2665	0.8695	1.0426	0.588	1.138	1.1265	1.1181	2.0949	1.1448	1.0416	1.2216	1.0968	0.8626	0.9269	0.4538	0.8554	0.6183	0.9234	0.6163	0.5805	1.1889	0.6238	0.9955	0.4345	1.0685	0.552	0.4097	1.0045	0.7965	1.8848	0.8201	1.545	0.6984	1.0472
1819	1-stearoyl-2-oleoyl-GPC (18:0/18:1)	Lipid	Phosphatidylcholine (PC)	52438	LC/MS Pos Late	100008904	2644	788.616	56421-10-4		24766704		HMDB08038	0.1073	0.2339	0.5484	1.0193	0.1073	2.4722	0.1073	0.1073	0.1073	0.1073	0.708	0.1073	1.0365	0.9488	0.1073	4.4384	2.9118	5.0929	3.0685	0.5813	0.6732	0.1073	0.1073	0.9807	0.1073	0.1642	2.9389	0.1073	2.5388	0.1073	0.1073	0.8927	0.1073	0.6536	1.5272	0.2551
2063	1-stearoyl-GPC (18:0)	Lipid	Lysophospholipid	33961	LC/MS Pos Late	100001271	1606	524.371	19420-57-6	497299	435389		HMDB10384	0.1763	0.6116	0.6981	1	0.2442	3.0499	0.0975	0.0975	0.0975	0.0975	0.8643	0.0975	0.4491	1.7534	0.2027	1.6805	3.9798	2.6495	5.302	0.5297	1.1	1.422	0.1921	8.5463	0.9128	0.4546	1.186	0.3759	1.4256	1.5108	0.273	0.3431	0.0975	0.5392	1.1648	0.3827
2110	1-stearoyl-GPE (18:0)	Lipid	Lysophospholipid	42398	LC/MS Pos Late	100001461	1626	482.324	69747-55-3	9547068	7826018		HMDB11130	0.3213	0.4852	0.8329	0.6123	0.9532	2.3526	0.1107	0.1685	0.9328	1.5584	1.218	0.1107	0.7837	5.0182	0.1107	3.1397	2.9538	2.0359	4.4603	1.5703	1.0867	1.3529	0.5045	3.1553	1.162	0.143	1.3525	1.0238	1	0.2377	0.4695	0.9182	0.1107	0.2354	0.4483	0.5113
2143	1-stearoyl-GPG (18:0)	Lipid	Lysophospholipid	34437	LC/MS Neg	100001462	5816	511.304			21403138			0.2835	0.27	0.27	0.27	0.27	0.3912	0.27	0.27	0.27	0.27	0.27	0.27	0.27	6.2201	0.27	1.8529	0.5667	1.1104	1.8044	1.9641	0.9983	1.8365	1.1996	2.6586	0.8131	0.3547	0.8659	0.754	0.636	1.2677	0.27	3.1544	0.27	0.27	0.5779	1.2306
2151	1-stearoyl-GPI (18:0)	Lipid	Lysophospholipid	19324	LC/MS Neg	100000656	5794	599.32	796963-93-4		21403067		HMDB61696	0.1732	0.1732	0.1732	0.1732	0.1732	1.9608	0.1732	0.1732	0.1732	0.1732	0.1732	0.1732	0.1732	3.553	1.0195	0.8603	0.2194	0.5324	5.768	1.0152	0.9203	1.4408	0.707	6.4097	0.405	0.1732	0.1732	0.1732	1	2.3015	0.1732	0.5802	0.1732	0.1732	0.1732	0.7991
2135	1-stearoyl-GPS (18:0)*	Lipid	Lysophospholipid	45966	LC/MS Pos Late	100004327	1634	526.314		9547101	7826051			0.8766	0.2779	0.1955	1.8176	1.3896	1.542	0.1955	0.1955	1.0072	0.1955	3.8993	0.1955	0.1955	4.0058	0.2172	1.394	0.6963	2.4025	11.6578	1.3933	2.6099	0.9928	0.5444	18.9607	0.3143	0.4696	0.3066	0.1955	0.7044	0.753	0.547	1.109	0.1955	0.345	0.5562	1.2409
1569	10-hydroxystearate	Lipid	Fatty Acid, Monohydroxy	47123	LC/MS Neg	100005852	5370	299.259		9561835	7838048		HMDB37396	0.603	0.04	0.0191	0.0343	0.1207	2.7172	0.1814	0.1677	3.9942	0.039	1	0.005	0.005	0.4618	0.6208	3.2442	1.7326	3.8595	0.3026	0.7988	1.5034	2.2699	0.7727	1.7706	1.1279	1.8509	0.6431	0.9826	0.309	3.3141	1.4302	1.0402	1.0336	0.0858	7.5097	1.0124
2680	11-ketoetiocholanolone sulfate	Lipid	Androgenic Steroids	38167	LC/MS Neg	100002125	4420	383.153						0.1955	0.1955	0.1955	0.1955	0.1955	2.9552	0.1955	0.1955	0.3445	0.1955	0.1955	0.1955	0.1955	0.1955	1.1221	0.1955	0.1955	0.1955	0.1955	0.1955	1.1498	0.631	0.1955	0.1955	0.1955	0.1955	0.1955	0.1955	0.1955	2.3953	0.8779	0.1955	0.1955	0.1955	0.1955	0.1955
1578	12,13-DiHOME	Lipid	Fatty Acid, Dihydroxy	38395	LC/MS Neg	62	5137	313.238	263399-35-5	10236635	8412123	C14829	HMDB04705	1.313	0.084	0.476	0.084	0.084	3.3537	0.2428	0.1891	0.6627	1.9615	0.2352	0.084	0.084	2.6333	1.0535	0.181	5.6916	0.7549	0.9112	0.8223	1	3.5568	0.3188	3.4286	1.1559	2.0019	1.5248	2.0643	0.2512	4.8937	0.5309	0.7099	0.084	0.084	1.3758	0.3462
2808	12-dehydrocholate	Lipid	Secondary Bile Acid Metabolism	44644	LC/MS Neg	100001072	4871	405.265	2458-08-4;2458-08-4	94235	85044		HMDB00400	0.1585	0.1585	0.9674	0.1585	0.1585	744.893	0.1585	0.1585	0.1585	0.499	5.7143	0.4849	0.1585	4.6504	2.4046	1.3395	1.1885	1.0326	1.0468	0.1585	0.8497	0.8155	0.372	1.2566	0.6187	0.7735	2.4875	1.1145	0.5696	56.9793	0.8425	4.2832	0.1585	0.1585	0.3767	0.1585
1557	13-HODE + 9-HODE	Lipid	Fatty Acid, Monohydroxy	37752	LC/MS Neg	100002196	5275	295.228		43013				0.3172	0.1471	1.703	0.9526	0.1492	1.8841	0.1079	0.1134	2.9843	0.0608	1.0586	0.0608	0.0608	1.1342	0.4165	1.0474	1.7652	1.447	1.3435	0.6953	0.9061	1.4243	0.27	5.238	0.6737	1.7467	0.8532	0.6353	0.2226	14.8728	0.9349	1.4398	0.8722	2.4468	2.3863	0.6178
2683	16a-hydroxy DHEA 3-sulfate	Lipid	Androgenic Steroids	38168	LC/MS Neg	100002126	4240	383.153						0.1969	0.1969	0.1969	0.1969	0.1969	1.7926	0.1969	0.1969	0.1969	0.7241	0.1969	0.1969	0.1969	0.1969	1.2143	0.1969	0.1969	0.1969	0.1969	0.1969	7.1979	0.1969	0.1969	1	0.1969	0.5877	0.1969	0.1969	0.1969	8.7123	0.2962	0.1969	0.1969	0.1969	0.1969	0.1969
3432	2'-deoxyadenosine	Nucleotide	Purine Metabolism, Adenine containing	1553	LC/MS Pos Early	211	2252	252.109	16373-93-6	13730	13135	C00559	HMDB00101	4.618	0.0204	0.1005	0.1994	0.0204	0.2872	0.1103	0.0204	0.0204	0.0743	0.0875	0.0204	0.4266	0.3804	0.2206	2.361	19.2958	4.954	31.6921	3.0229	0.6377	10.6502	0.3736	11.6548	5.7731	0.0659	2.0237	0.8084	1.4249	1.8855	0.3248	0.2295	0.0204	0.0229	0.4763	6.482
3518	2'-deoxycytidine	Nucleotide	Pyrimidine Metabolism, Cytidine containing	15949	LC/MS Pos Early	100000125	2193	228.098	951-77-9	13711	13117	C00881	HMDB00014	1.8837	0.0106	0.0106	0.0106	0.0106	1.1742	0.0106	0.0106	0.0421	0.0106	0.1893	0.0106	0.0106	6.6435	1.6366	0.3447	1.8632	2.0467	3.3825	0.5374	0.5128	2.597	1	5.9675	1.3422	0.2347	0.9888	0.6844	0.4142	3.8676	0.5906	1.191	0.0106	0.0106	2.4366	2.7876
3461	2'-deoxyguanosine	Nucleotide	Purine Metabolism, Guanine containing	1411	LC/MS Neg	348	1751	266.089	961-07-9	187790	163230	C00330	HMDB00085	0.2416	0.0153	0.0153	0.0485	0.0153	3.0466	0.0153	0.0153	0.0689	0.0153	0.0261	0.0153	0.0153	2.4521	1	0.5084	2.4472	0.6069	3.7831	0.2126	1.011	2.6804	0.9648	2.8077	1.6039	0.0153	0.0153	1.8752	1.8566	7.416	0.6871	0.2533	0.0153	0.0153	0.236	1.3074
3394	2'-deoxyinosine	Nucleotide	Purine Metabolism, (Hypo)Xanthine/Inosine containing	15076	LC/MS Neg	100000135	1688	251.079	890-38-0	65058	58569	C05512	HMDB00071	0.303	0.0055	0.0055	0.016	0.0055	5.1669	0.0055	0.0055	0.0617	0.0055	0.0356	0.0055	0.0055	10.6433	1.5855	0.5352	4.8242	0.7107	4.8746	0.2918	1.489	5.4228	0.8993	1	4.5487	0.0088	0.0055	5.3447	1.6812	3.5187	0.3369	0.5683	0.0055	0.0177	0.2498	5.5024
3494	2'-deoxyuridine	Nucleotide	Pyrimidine Metabolism, Uracil containing	52602	LC/MS Neg	536	1586	227.067	951-78-0	13712	13118	C00526	HMDB00012	0.705	0.0376	0.0105	0.0503	0.0229	0.5867	0.0148	0.0105	0.0877	0.0416	0.0381	0.0105	0.0231	2.3383	1.0802	0.3867	1.5953	1.0132	2.4969	1	1.0845	4.0311	1.6883	0.9887	1.2677	0.124	0.7427	1.4584	2.2151	3.4984	0.1633	0.8977	0.0105	0.0105	1.1001	1.7351
3519	2'-O-methylcytidine	Nucleotide	Pyrimidine Metabolism, Cytidine containing	57554	LC/MS Pos Early	100010895	2411	258.108	2140-72-9	150971	133067			0.0879	0.0879	0.0879	0.0879	0.0879	1.8207	0.0879	0.0879	0.0879	0.0879	0.5584	0.0879	0.1415	1.051	2.5106	1.703	1.2509	1.9771	1.4511	1.1663	0.3963	3.282	0.9604	0.82	0.6903	0.4189	1.1486	0.6889	0.4741	1.3437	0.536	1.5009	0.0879	0.0879	1.0396	0.9284
3482	2'-O-methyluridine	Nucleotide	Pyrimidine Metabolism, Uracil containing	57655	LC/MS Neg	100010896	1831	257.078	2140-76-3	102212	92343			0.6447	0.5018	0.1545	0.1545	0.1545	0.5123	0.1545	0.1545	1.0705	0.6183	0.6192	0.1545	0.1545	1.1045	0.5729	0.9795	1.1292	1.1563	0.7979	2.4356	1	2.903	1.0934	0.2161	1.9023	1.2897	0.9085	0.4044	0.9948	0.7621	0.4058	2.1555	0.1545	0.1545	1.0908	1.979
324	2,3-dihydroxy-2-methylbutyrate	Amino Acid	Leucine, Isoleucine and Valine Metabolism	57547	LC/MS Polar	100010869	1318	133.051	14868-24-7	301941	266858		HMDB29576	0.0529	0.0529	0.0529	0.0529	0.0529	65.6658	0.0529	0.0529	0.98	0.0529	0.6851	0.0529	0.0529	4.9182	0.4433	0.3742	0.26	2.0988	1	4.9281	0.0529	2.7011	0.0529	42.3349	0.8935	4.4453	3.7043	0.0529	0.0529	2.9435	0.5749	0.9847	0.0529	0.0529	0.205	0.0529
3896	2,3-dihydroxyisovalerate	Xenobiotics	Food Component/Plant	38276	LC/MS Polar	100002417	1050	133.051	1756-18-9	677	657	C04039	HMDB12141	0.2707	0.2091	0.2091	0.2091	0.2091	8.0116	0.2091	0.2091	0.636	0.2091	0.3596	0.2091	0.2091	52.4042	3.2524	4.3502	1.0355	11.1774	0.4128	1.5713	1.6047	2.2281	0.9766	0.4515	1.6204	0.442	1.9338	0.9113	0.2091	9.1133	0.2358	1	0.2091	0.2091	0.5741	0.2091
312	2,3-dimethylsuccinate	Amino Acid	Leucine, Isoleucine and Valine Metabolism	20703	LC/MS Polar	100000849	2800	145.051	13545-04-5	11848	11355			1.0732	0.1913	0.0815	0.116	0.4332	1.0483	0.0896	0.0361	0.5067	0.3316	1.0066	0.0361	0.1275	0.7078	0.7109	1.5057	2.3933	1.4582	1.0388	2.0415	0.6421	1.1184	0.5887	0.7362	2.321	0.7205	1.3884	1.8602	2.693	0.923	0.7173	2.8184	0.0361	0.2664	2.0669	0.3485
3712	2,4,6-trihydroxybenzoate	Xenobiotics	Benzoate Metabolism	35892	LC/MS Neg	100001718	1574	169.014	83-30-7	66520	59891		HMDB29649	0.8655	0.1478	0.1478	0.1478	1.4466	4.9228	0.1478	0.1478	0.5835	0.1478	0.7255	0.1478	0.1478	5.3658	0.8075	0.7547	0.7277	2.0624	11.0478	1.6643	0.3541	1.6879	2.5294	3.5705	2.0216	1	1.5624	0.9406	0.1478	1.6517	0.6264	20.3712	0.3849	0.1478	0.7319	0.8656
4862	2,4-dihydroxyhydrocinnamate	Xenobiotics	Chemical	47113	LC/MS Neg	100005258	1759	181.051	5631-68-5	96384	87007			0.2202	0.2202	0.2202	0.2202	0.2202	0.943	0.2202	0.2202	1	0.2202	0.2202	0.2202	0.2202	0.2202	0.2202	0.2202	2.183	0.2202	0.6982	0.4445	0.2202	0.8063	0.2202	0.2202	0.6981	1.6874	0.2202	8.1907	0.2202	0.2202	0.2202	0.2202	0.2202	0.2202	0.2202	0.2888
3899	2,8-quinolinediol	Xenobiotics	Food Component/Plant	42975	LC/MS Pos Early	100004206	2514	162.055	15450-76-7	97250	87777	C06342		0.1234	0.1234	0.1234	0.1234	0.3768	0.1234	0.1234	0.1234	0.1234	0.1234	0.1234	0.1234	1.066	0.1234	2.6843	0.97	0.2752	86.7823	0.9131	67.942	0.1234	0.1234	1	0.1234	0.1234	1.8245	0.1234	1.4611	0.1234	4.3117	0.3634	0.1234	0.1234	0.1234	0.6279	10.5862
4306	2-acetamidobutanoate	Xenobiotics	Bacterial/Fungal	53232	LC/MS Polar	100009237	1340	144.067		306107	270613			0.8302	0.2343	0.2343	0.2343	0.2385	0.5162	0.2343	0.2343	0.2343	0.2343	2.8543	0.2343	0.2343	0.6111	1.3487	0.2396	2.4379	0.2343	0.2343	2.3847	0.2343	0.4578	0.5622	2.0252	0.3774	1.488	1.1205	0.8795	0.2343	1.6157	0.2343	0.2343	0.2343	0.2343	0.2343	0.2343
102	2-aminoadipate	Amino Acid	Lysine Metabolism	6146	LC/MS Polar	381	3500	160.062	542-32-5;1118-90-7	469	456	C00956	HMDB00510	2.6711	0.4475	0.4475	0.4475	0.4475	1.6534	0.4475	0.4475	0.4475	0.4849	0.4475	0.4475	0.4475	1.124	0.5666	0.4475	0.7773	1	0.4475	1.6183	4.145	0.6728	0.4506	0.9818	1.202	1.0761	0.8955	1.0734	0.5157	0.9798	1.138	0.4475	0.4475	0.4475	0.8742	0.4475
442	2-aminobutyrate	Amino Acid	Glutathione Metabolism	42374	LC/MS Polar	1128	2451.5	102.056	1492-24-6	439691	388757	C02261	HMDB00650	0.1114	0.0987	0.0987	0.0987	0.0987	0.5386	0.0987	0.0987	0.0987	0.0987	0.2583	0.0987	0.0987	1.7828	1.051	3.139	0.0987	1.5008	0.338	9.2627	0.3053	1.0278	0.162	1.0647	1.0685	0.9709	1.5257	0.5309	1	1.6821	0.0987	0.9187	0.0987	0.0987	0.0987	0.7952
1386	2-aminoheptanoate	Lipid	Fatty Acid, Amino	43761	LC/MS Pos Early	100004542	3160	146.118	1115-90-8	227939	198338			48.6826	0.198	0.145	0.6106	0.145	0.145	0.145	0.145	0.145	0.5801	0.487	0.145	0.145	1.5996	3.7765	0.5211	8.1105	0.145	2.0723	1.0196	0.145	0.145	0.145	0.9804	0.9798	0.4922	4.1052	0.4043	1.3361	2.8275	1.8104	5.9985	0.145	0.145	5.489	0.5352
252	2-aminophenol	Amino Acid	Tryptophan Metabolism	38109	LC/MS Pos Early	100002382	2644	110.06	95-55-6	5801	5596	C01987		3.1624	1.0088	1.5058	0.5885	1.1452	1.4531	0.6014	0.3124	1.8823	2.6659	3.2979	0.1942	0.4104	10.3531	0.4446	0.5036	2.5365	0.5818	1.2796	2.887	1.1086	2.1321	3.8055	3.2805	2.6402	1.6433	0.3382	1.3988	0.765	0.7727	0.5287	0.4764	0.7703	0.6117	0.8341	0.547
984	2-deoxyribose	Carbohydrate	Pentose Metabolism	537	LC/MS Polar	909	1216	179.056	533-67-5	22833604	4573703	C01801	HMDB03224	0.1112	0.017	0.017	0.017	0.017	2.4191	0.017	0.017	0.1422	0.017	0.1076	0.017	0.017	2.7734	0.7107	0.7913	1.096	0.6308	0.617	1.6533	1.2768	2.0103	0.9024	0.1245	1	1.0928	0.5029	1.3263	1.1732	0.3582	0.043	1.7357	0.017	0.017	1.1539	0.6607
319	2-hydroxy-3-methylvalerate	Amino Acid	Leucine, Isoleucine and Valine Metabolism	36746	LC/MS Neg	100001541	1800	131.071	488-15-3	164623	144317		HMDB00317	1.6849	1.0286	0.0647	0.0298	0.3833	1.2111	0.168	0.0298	2.2461	0.1584	3.1477	0.0298	0.0839	13.3131	0.4133	1.6182	0.4824	0.5752	0.3072	18.121	0.4173	0.5613	1.205	2.6868	4.5836	0.9714	52.8415	0.1256	1.9075	8.7235	0.0827	3.1805	0.0298	0.0345	0.1905	2.8571
1527	2-hydroxyarachidate*	Lipid	Fatty Acid, Monohydroxy	61700	LC/MS Neg	100019892	5990	327.29		5225199	4395406			0.9703	1.1145	1.325	1.089	1.5553	0.7753	1.252	0.3934	8.12	1.9283	1.8116	0.2253	5.0004	1.0297	0.4433	1.3495	0.1876	3.061	0.3353	2.5719	0.0535	2.1709	0.8884	0.6028	0.2673	0.2243	6.6246	0.3897	0.2004	0.1049	1.3921	0.7486	0.765	1.2673	0.462	1.3439
1528	2-hydroxybehenate	Lipid	Fatty Acid, Monohydroxy	57663	LC/MS Neg	100015637	6384	355.322		193484	167899			0.4946	2.0955	2.9181	3.1173	2.4161	0.7543	2.3551	0.719	5.6874	1.182	2.2513	1.0937	6.1579	1.0437	0.2754	0.5254	0.0626	1	0.3124	2.7365	0.0337	0.5842	0.8192	0.2785	0.1583	0.1435	1.7468	0.2152	0.2426	0.043	1.4347	1.0367	2.3555	4.0887	0.3098	1.0587
444	2-hydroxybutyrate/2-hydroxyisobutyrate	Amino Acid	Glutathione Metabolism	52281	LC/MS Polar	100008928	1258	103.04						2.4069	1.7328	0.204	0.1637	0.4783	1.0972	0.277	0.1348	0.67	0.3613	2.9758	0.1348	0.1898	4.4198	0.2629	1.3852	1.041	0.7777	0.7361	1.5628	0.2924	1.3954	0.3886	8.4798	1.8813	1.2271	5.025	1.5536	0.6705	7.7327	0.56	0.4775	0.1348	0.1348	0.3783	0.6925
1521	2-hydroxydecanoate	Lipid	Fatty Acid, Monohydroxy	42489	LC/MS Neg	100004089	4840	187.134	5393-81-7	21488	20195			1.8708	0.3007	0.3007	0.3007	0.3114	2.3363	0.3007	0.3007	0.3007	0.3007	0.5746	0.3007	0.3007	1.0094	0.6111	0.3007	3.8001	0.5055	0.7941	0.4531	0.9417	1.8701	0.4902	1.4076	0.9808	2.0463	0.9635	2.7052	1.1972	1.9735	0.9906	1.4751	0.3956	0.9145	3.8676	0.5048
1311	2-hydroxyglutarate	Lipid	Fatty Acid, Dicarboxylate	52294	LC/MS Pos Early	100002070	958	166.071	40951-21-1	43	42	C02630	HMDB00606	1.1131	1.2582	0.0929	0.2035	0.9206	0.9391	0.2383	0.0272	3.2526	0.9584	4.1958	0.0345	0.4491	3.2569	1.0547	5.9315	0.3279	4.0256	0.2748	13.3261	1.0458	1.5025	1.7681	0.0469	7.1883	3.3253	15.9017	0.2987	1.5004	0.3972	0.806	5.2754	0.0272	0.2953	0.4588	4.3197
1519	2-hydroxyheptanoate*	Lipid	Fatty Acid, Monohydroxy	61827	LC/MS Neg	100019960	2900	145.087		2750949	2032206			1	0.3432	0.3432	0.3432	0.3432	0.7687	0.3432	0.3432	0.3432	1.5125	0.3432	0.3432	0.3432	0.3432	0.4825	0.7487	1.6625	0.6511	2.2628	0.4778	0.3432	0.3432	0.3432	0.9606	1.1134	0.3432	1.4709	1.5711	0.7331	2.0991	0.7149	0.513	0.3432	0.3432	1.6013	0.3432
4357	2-hydroxyibuprofen	Xenobiotics	Drug - Analgesics, Anesthetics	43330	LC/MS Neg	100004169	3462	221.118	51146-55-5	10443535			HMDB60920	0.9924	0.9924	0.9924	0.9924	0.9924	0.9924	0.9924	0.9924	0.9924	0.9924	0.9924	0.9924	0.9924	0.9924	0.9924	0.9924	1.9486	0.9924	0.9924	0.9924	0.9924	0.9924	0.9924	0.9924	0.9924	0.9924	0.9924	0.9924	0.9924	0.9924	0.9924	0.9924	0.9924	1	0.9924	0.9924
1522	2-hydroxylaurate	Lipid	Fatty Acid, Monohydroxy	52916	LC/MS Neg	100008934	5211	215.165	2984-55-6	97783	88259			2.1802	1.7294	0.7136	1.7383	0.517	1.4619	0.3738	0.3006	1.3385	0.2918	1.002	0.4987	1.5514	0.7246	0.26	0.7869	2.2105	0.9959	0.7063	1.4101	0.4114	2.092	0.8464	0.4015	1.5674	2.0947	1.4743	1.7978	2.3095	1.2567	0.6071	0.998	0.602	0.26	2.3045	0.5664
1529	2-hydroxylignocerate*	Lipid	Fatty Acid, Monohydroxy	61699	LC/MS Polar	100019894	710	383.353		102430	92507	C17873	HMDB39540	0.0387	1.0295	2.379	1.3085	1.7889	0.5772	6.0952	0.6233	0.0387	0.0387	0.38	7.677	3.9235	0.3888	0.2324	0.724	0.0387	4.2518	0.0387	6.8757	0.0387	0.7022	1.2435	0.0387	0.9705	0.0387	3.2597	0.4164	0.0387	0.0387	0.8084	1.6767	17.419	4.2724	0.3624	2.5003
1523	2-hydroxymyristate	Lipid	Fatty Acid, Monohydroxy	32413	LC/MS Neg	100001180	5364	243.197	2507-55-3	1563	1508	C13790	HMDB02261	1.3473	1.527	0.7178	1.3768	0.0331	1.0001	0.0716	0.1789	1.8905	2.4371	1.216	0.0883	0.7103	1.1301	0.2934	0.9126	0.6464	1.2865	0.4914	1.025	0.0331	1.7049	1.1439	0.2461	0.7859	1.6511	2.1079	1.3717	0.6867	0.4627	0.9999	0.5955	0.0331	0.0331	1.1971	0.5117
1530	2-hydroxynervonate*	Lipid	Fatty Acid, Monohydroxy	61698	LC/MS Neg	100015638	6345	381.337		5312783	4472208			0.9708	2.5105	1.9517	1.5793	1.1996	1.2335	0.7363	0.5838	6.566	7.3145	3.7415	0.8677	3.4313	1.665	0.2247	3.6954	0.3212	2.1119	0.6776	2.8216	0.0198	0.7296	1.1809	0.6814	0.4512	0.7415	2.5297	0.4698	0.3657	0.0918	1.0473	1.0292	0.7364	0.8424	0.3775	1.3015
1520	2-hydroxyoctanoate	Lipid	Fatty Acid, Monohydroxy	22036	LC/MS Neg	100000743	3736.8	159.103	617-73-2	94180	84994		HMDB02264	1.5021	0.3195	0.3195	0.3195	0.3195	0.3195	0.3195	0.3195	0.3195	0.3195	0.3195	0.3195	0.3195	0.3195	0.3195	0.3195	0.3465	0.3195	1.2351	0.3195	0.3195	0.3195	0.3195	0.3195	0.3195	0.3195	0.3195	0.3195	0.3195	0.3195	0.3195	0.3195	0.3195	0.4533	2.1754	0.3195
1525	2-hydroxyoleate	Lipid	Fatty Acid, Monohydroxy	54920	LC/MS Neg	100010866	5560	297.244	56472-29-8	9796304	7972070			1	0.0933	2.9011	0.0933	1.5862	2.0441	0.7759	0.0984	0.7693	0.5298	0.4276	0.0933	0.0933	2.733	0.7768	3.0303	0.0933	2.2081	0.5297	1.6489	0.3568	1.6015	1.4675	0.7597	0.0933	1.5029	4.0458	0.7431	0.6489	0.5133	1.0331	0.0933	0.6658	0.0933	0.0933	1.514
1524	2-hydroxypalmitate	Lipid	Fatty Acid, Monohydroxy	35675	LC/MS Neg	100001579	5511.2	271.228	764-67-0	92836	83805		HMDB31057	2.0673	0.1021	0.4509	0.1492	0.2925	2.8622	0.5011	0.2785	9.7416	0.4603	2.555	0.0576	0.1939	4.2127	0.4299	2.6348	0.9107	2.4965	0.6865	2.2315	0.0264	3.0365	1.9132	0.6098	1.2273	1.0239	4.476	1.8714	1.0004	0.3029	1.124	0.9311	0.4457	0.9996	0.9674	1.1616
180	2-hydroxyphenylacetate	Amino Acid	Tyrosine Metabolism	1432	LC/MS Neg	235	2164.6	151.04	614-75-5	11970	11476	C05852	HMDB00669	1.9338	0.2226	0.2226	0.2226	0.2226	2.3795	0.2226	0.2226	0.2226	0.2226	1.7216	0.2226	0.2226	3.2584	0.4519	0.7856	4.2861	0.7929	0.6071	1.1288	0.2226	2.6667	0.2226	1.9021	1.1975	0.6455	0.8712	0.2226	0.6027	0.2226	0.2226	0.2226	0.2226	0.2226	0.2226	0.2226
1526	2-hydroxystearate	Lipid	Fatty Acid, Monohydroxy	17945	LC/MS Neg	1239	5695	299.259	629-22-1	69417	62625	C03045		2.1351	0.4503	0.2289	0.4278	0.3531	2.6113	0.2974	0.1187	1.4221	0.751	0.5349	0.1069	0.7154	3.3091	0.6963	5.0135	0.6797	5.632	0.9975	4.8174	0.1577	3.076	4.3371	0.9606	0.8815	1.024	8.6248	1.6813	1.0025	0.351	2.2761	1.6849	0.1758	0.4373	1.1676	2.0298
3903	2-isopropylmalate	Xenobiotics	Food Component/Plant	15667	LC/MS Polar	100000409	2605	175.061	3237-44-3	77	76	C02504	HMDB00402	0.8546	0.5757	0.039	0.039	1.2094	244.341	0.2621	0.039	10.1766	0.8503	2.2535	0.039	0.0688	164.563	2.1522	2.9911	0.8179	5.8902	0.8688	5.5312	2.6406	3.655	0.6186	7.5081	0.9224	0.8622	2.4595	0.3892	0.5089	6.794	2.5129	7.0269	0.039	0.2111	0.9668	0.5826
2319	2-linoleoylglycerol (18:2)	Lipid	Monoacylglycerol	32506	LC/MS Neg	100000987	6250	279.233	3443-82-1	5365676	4517636		HMDB11538	0.907	0.8801	2.5729	0.4062	0.3845	1.3554	0.8437	0.246	2.1676	1.6319	1.0012	0.246	0.3993	0.246	0.246	0.246	0.7653	0.4722	1.3524	0.3884	3.3132	0.2518	0.5098	21.5648	1.2179	2.9349	0.3316	0.3254	0.246	82.0893	4.164	2.896	0.246	1.4405	0.246	0.9988
1143	2-methylcitrate/homocitrate	Energy	TCA Cycle	52282	LC/MS Neg	100008929	575	205.035						4.5907	0.1904	0.0898	0.0898	0.0898	6.261	0.1994	0.1273	0.7021	0.1204	0.337	0.0898	0.0898	6.9471	0.7962	2.1125	1.4756	1.6148	1.0261	2.4863	2.321	0.6233	1.4238	0.6816	4.8966	0.4511	0.9704	0.7457	0.8911	1.7912	0.4155	3.3324	0.0898	0.188	2.0341	1.0382
1151	2-methylmalonylcarnitine (C4-DC)	Lipid	Fatty Acid Synthesis	35482	LC/MS Pos Early	100001596	2440	262.129	149181-64-6	53481628	21403178		HMDB13133	0.3068	0.1881	0.1282	0.1282	0.1282	1.2893	0.1282	0.1282	0.2623	0.1282	1.4204	0.1282	0.1282	1.5779	0.2443	4.2625	1.4706	3.2158	0.5726	0.9226	2.8923	0.1692	1.812	0.1282	2.1541	1.0891	0.1282	7.379	0.5982	0.7569	0.6823	0.1769	0.1282	0.1282	1.8311	0.9336
15	2-methylserine	Amino Acid	Glycine, Serine and Threonine Metabolism	53229	LC/MS Pos Early	100009246	1652	120.066		94309	85112	C02115		1.8635	2.3996	0.2813	0.3237	0.8963	4.5166	0.6322	0.1505	1.0101	0.4924	2.2019	0.1505	1.3985	6.519	1.3151	2.302	0.1505	5.4898	1.2564	0.8111	0.7114	0.1505	0.6521	0.7243	0.9073	4.5351	0.5906	0.9899	0.1505	0.1505	0.7244	0.1505	0.1505	0.2077	1.5688	0.1505
2318	2-oleoylglycerol (18:1)	Lipid	Monoacylglycerol	21232	LC/MS Neg	100000943	6500	281.249	3443-84-3	5319879	4478086		HMDB11537	0.5898	0.5825	1.536	0.9635	0.4066	4.2283	0.8397	0.353	1.8769	1.3825	0.2737	0.2737	0.7767	1.1725	0.3651	0.5548	1.0513	0.7574	0.8363	0.882	1.2343	0.8823	0.4481	1.2013	1	1.589	0.7333	0.6555	0.377	26.2672	3.2007	1.3348	0.6202	1.5708	2.1501	1.3107
3904	2-oxindole-3-acetate	Xenobiotics	Food Component/Plant	40479	LC/MS Pos Early	100003109	2378	192.066	2971-31-5	3080590	2338343		HMDB35514	2.8745	0.0789	0.0234	0.153	0.0234	2.5272	0.0668	0.0403	0.3315	0.3039	0.0234	0.0234	0.0234	1.0764	1	0.172	1.0203	0.2737	0.8808	0.0881	3.7753	2.9563	1.8072	1.7567	0.0674	2.1878	2.2758	3.4554	1.0373	1.8907	3.2593	0.572	0.0234	2.0429	0.302	0.1311
4752	2-oxo-1-pyrrolidinepropionate	Xenobiotics	Chemical	40452	LC/MS Pos Early	100003265	1600	158.081	77191-38-9	3146688	2398914			1.0224	0.8653	0.3456	0.4502	0.6019	1.2618	1.489	0.1015	1.868	1.5392	1.3251	0.4226	0.6876	1.066	0.6164	0.6194	1.5493	1.5621	1.0809	0.7508	0.8243	1.0926	0.6559	0.3259	1.629	0.9236	0.7005	0.9914	2.1865	1.0139	1.3344	0.7555	0.6131	0.5406	1.7836	0.2156
372	2-oxoarginine*	Amino Acid	Urea cycle; Arginine and Proline Metabolism	55072	LC/MS Pos Early	100002784	1760	174.087	3715-10-04	558	542	C03771	HMDB04225	1.4084	0.701	0.0851	0.0818	0.905	1.959	0.3082	0.0283	1.1494	1	0.7261	0.0283	0.2217	4.5794	2.3876	1.0154	0.4023	3.6911	0.7301	1.1667	0.8213	3.1134	0.588	1.3859	0.9749	0.5567	1.1578	0.622	2.1444	3.5897	0.3599	1.6672	0.0516	0.1569	1.5576	1.0132
2315	2-palmitoylglycerol (16:0)	Lipid	Monoacylglycerol	33419	LC/MS Neg	100001048	6400	255.233	23470-00-0	123409	110006		HMDB11533	0.6359	1.9504	1.896	1.8395	1.4352	0.6014	1.6758	1.5374	1.7943	2.0946	1.3077	2.0251	2.0919	0.9789	0.8298	1.4634	0.3855	0.6766	0.483	1.0579	0.3702	0.5926	0.6667	0.5	0.4155	0.4738	0.7176	0.4727	0.4377	0.4887	0.559	0.8427	1.3275	2.6178	0.8998	1.1831
3812	2-piperidinone	Xenobiotics	Food Component/Plant	43400	LC/MS Pos Early	100004295	1675	100.076	675-20-7	12665	12144		HMDB11749	4.1209	1.1338	0.4061	0.2832	1.0551	13.5427	0.8124	0.6009	1.2057	0.9449	6.0791	0.2101	0.4091	2.0384	0.2038	0.4005	4.1076	0.2689	1.3982	1.456	0.4464	1.2438	0.5482	10.8753	3.3474	4.9543	4.4039	1.3284	1.7891	0.9233	0.5795	1.485	0.2594	0.1017	0.4078	0.5437
57	2-pyrrolidinone	Amino Acid	Glutamate Metabolism	31675	LC/MS Pos Early	100001081	1262	86.06	616-45-5	12025	11530		HMDB02039	8.8235	35.8591	15.7231	21.0176	39.8283	1.5335	57.854	5.3238	43.0872	50.7201	44.2404	28.3926	24.8723	1.0635	0.5233	0.395	0.4836	0.2695	0.824	0.4684	0.8016	0.8298	0.4188	0.9365	2.752	0.6531	0.6495	1.0885	1.4335	0.9083	27.2439	0.2655	25.7478	20.4086	0.1907	0.2386
3901	20-hydroxyecdysone	Xenobiotics	Food Component/Plant	27446	LC/MS Neg	100001037	4021	479.301	5289-74-7	5459840	4573597	C02633	HMDB30180	0.0559	0.0559	0.0559	0.0559	0.0559	1	0.0559	0.0559	0.0559	0.0559	0.0559	0.0559	0.0559	0.0559	0.0559	0.0559	0.0559	0.0559	0.0559	0.0559	0.0559	0.0559	0.0559	0.0559	0.0559	0.0559	0.0559	0.0559	0.0559	0.0559	0.0559	1.184	0.0559	0.0559	0.0559	0.0559
166	3,4-dihydroxyphenylacetate	Amino Acid	Tyrosine Metabolism	18296	LC/MS Neg	100000449	1040	123.045	102-32-9	547	532	C01161	HMDB01336	0.3653	0.3653	0.3653	0.3653	0.3653	67.8398	0.3653	0.3653	0.3653	0.3653	0.5974	0.3653	0.3653	9.3243	2.4086	0.3653	0.9556	0.3653	0.3653	0.3653	0.3653	0.3653	0.3653	16.7562	0.3653	0.6711	0.3653	0.3653	0.3653	8.6511	0.3831	0.3653	0.3653	0.3653	0.3653	0.3653
3784	3,7-dimethylurate	Xenobiotics	Xanthine Metabolism	34399	LC/MS Neg	100001398	1418.2	195.052	13087-49-5	83126	74994	C16360	HMDB01982	0.1557	1.9841	0.6859	1.0646	0.552	5.8202	0.0743	0.043	0.9755	2.7522	0.1106	0.043	0.043	0.2864	2.2576	0.983	5.9217	0.7081	2.2649	1.0531	2.8886	2.6357	0.4848	1.017	2.4675	4.8259	0.3464	0.4117	0.1429	7.0902	0.5843	2.7692	0.0836	0.043	2.4639	0.4261
3748	3-(2-hydroxyphenyl)propionate	Xenobiotics	Benzoate Metabolism	35634	LC/MS Neg	100001623	2530	165.056	495-78-3	873	850	C01198	HMDB33752	0.4212	0.3904	0.3904	0.3904	0.8004	0.3904	0.3904	0.3904	1.0193	0.8114	0.9461	0.3904	0.3904	6.8446	0.815	1.2777	4.446	0.6086	3.0431	4.3851	0.3904	7.924	0.3919	0.3904	1.4062	0.8521	0.4281	6.1566	0.3904	0.3904	1.789	0.562	0.3904	0.3904	0.3904	0.5639
3772	3-(3-hydroxyphenyl)propionate	Xenobiotics	Benzoate Metabolism	35635	LC/MS Neg	100001624	1980	165.056	621-54-5	91	89	C11457	HMDB00375	0.2801	0.0336	0.4833	0.0336	1.0532	596.787	0.0853	0.0336	44.8468	0.0336	0.5675	0.0336	0.0336	0.6523	2.9473	0.7955	7.8275	0.7116	8.8447	2.29	0.5407	1.3996	0.1056	47.8762	1.0363	52.5553	0.4468	77.1791	0.7422	480.122	1	0.7787	0.0688	0.384	0.2558	0.4633
3769	3-(3-hydroxyphenyl)propionate sulfate	Xenobiotics	Benzoate Metabolism	45415	LC/MS Neg	100005391	1294	245.013	86321-32-6	187488	162993			0.1171	0.1171	0.1171	0.1171	0.1171	139.327	0.1171	0.1171	1	0.1171	0.1171	0.1171	0.1171	0.1171	0.3739	0.1171	0.1171	0.1228	0.2132	0.1171	0.1171	0.1171	0.1171	1.8789	0.1171	2.1014	0.1171	0.4432	0.1171	7.4606	0.1171	0.1171	0.1171	0.1171	0.1171	0.1171
145	3-(4-hydroxyphenyl)lactate	Amino Acid	Tyrosine Metabolism	32197	LC/MS Neg	240	1379	181.051	6482-98-0	9378	9010	C03672	HMDB00755	0.6593	0.7873	0.0234	0.0465	0.3641	1.8619	0.1069	0.0086	0.6537	0.3348	1.605	0.0086	0.1257	17.9994	0.1117	2.0736	0.5406	1.0214	0.2582	11.5501	1.0375	0.3976	3.098	0.1562	2.9503	5.7788	11.1435	0.7904	1.2433	10.7238	0.0288	1.7139	0.0086	0.0462	1.4594	1.6814
3773	3-(4-hydroxyphenyl)propionate	Xenobiotics	Benzoate Metabolism	39587	LC/MS Neg	100002914	1670	165.056	501-97-3	10394	9965	C01744	HMDB02199	0.2843	0.0433	0.165	0.0433	1.7476	26.492	0.0433	0.0433	13.1343	0.0433	4.2998	0.0433	0.0433	0.5167	0.4434	0.5963	24.8952	0.1586	1.7307	2.0561	0.2039	0.4013	0.2402	2.6204	1	17.8057	1.5177	3.3	0.0644	14.4752	0.1031	1.9156	0.0433	0.0433	0.3658	0.1411
3533	3-aminoisobutyrate	Nucleotide	Pyrimidine Metabolism, Thymine containing	1566	LC/MS Pos Early	1114	2190	104.071	10569-72-9;214139-20-5	64956	58481	C05145	HMDB03911	1.5428	0.8188	0.3363	0.3363	1.0161	0.6573	0.7101	0.3363	0.9839	0.5667	1.5583	0.3363	1.2255	0.9377	0.5949	0.5045	0.7351	0.3363	0.3363	1.5029	0.3363	1.3045	0.3363	2.0438	2.0942	0.894	1.21	0.3363	0.3363	1.947	0.3363	0.6079	0.3363	0.5322	3.6937	0.3363
1344	3-carboxy-4-methyl-5-pentyl-2-furanpropionate (3-CMPFP)**	Lipid	Fatty Acid, Dicarboxylate	61871	LC/MS Neg	100020004	4000	267.124		194501	168762			1.4113	0.0591	0.0591	0.0591	0.0591	2.3289	0.0591	0.0591	0.0591	0.0591	0.3586	0.0591	0.0591	2.2272	0.5294	1.0974	2.7238	0.6467	0.6341	0.4513	0.898	3.1315	0.606	1.6639	3.9868	3.0108	2.6909	0.9026	4.1601	0.8024	0.7407	0.5105	0.0591	0.0591	1.3325	0.81
1342	3-carboxy-4-methyl-5-propyl-2-furanpropanoate (CMPF)	Lipid	Fatty Acid, Dicarboxylate	31787	LC/MS Neg	100001178	2800	239.092	86879-39-2	123979	110498		HMDB61112	1.499	0.1605	0.1605	0.1605	0.1605	1.6878	0.1605	0.1605	0.1605	0.1605	0.1605	0.1605	0.1605	0.1605	0.1605	2.1514	0.1605	0.3455	0.858	0.1605	1	4.1119	0.1605	0.6955	4.7027	0.2066	1.1155	1.1721	1.1672	0.1605	0.9848	0.1605	0.1605	0.1605	0.8414	0.5255
1314	3-carboxyadipate	Lipid	Fatty Acid, Dicarboxylate	54723	LC/MS Neg	100009325	571	189.04	923-42-2	222467	193135			0.9492	0.239	0.1733	0.1733	0.7096	2.1279	0.2376	0.1733	0.7404	0.4228	0.902	0.1733	0.1733	1.653	0.5487	3.7201	1.3744	4.4069	0.6569	2.5509	3.2626	0.4758	1.2688	0.3259	14.4075	1	2.4414	0.4717	0.5675	1.006	3.8038	2.2612	0.8014	0.7899	1.827	1.2356
3862	3-dehydroshikimate	Xenobiotics	Food Component/Plant	36764	LC/MS Polar	100001679	1962	171.03	2922-42-1	80	79	C02637		0.1673	0.1673	0.1673	0.1673	0.1673	4.0938	0.1673	0.1673	2.7828	0.1673	0.7621	0.1673	0.1673	20.5494	0.1673	0.1673	0.1673	0.8196	0.1876	0.42	0.1673	1.5941	0.3846	1.6303	1.1804	0.1673	0.7112	0.1673	0.1673	16.6754	0.1673	0.1673	0.1673	0.1673	0.1673	0.1673
2547	3-hydroxy-3-methylglutarate	Lipid	Mevalonate Metabolism	531	LC/MS Polar	112	2850	161.046	503-49-1	1662	4573695	C03761	HMDB00355	2.3885	0.4059	0.144	0.0695	0.5057	5.6977	0.1961	0.0174	0.7635	0.2852	1.0524	0.018	0.0917	28.4036	0.9956	0.7358	1.0044	1.7435	1.281	2.8368	1.3512	5.9599	2.8787	1.2344	1.3109	2.3569	0.5698	0.519	0.6787	1.6542	0.4572	1.1379	0.0268	0.1035	0.542	1.5091
1316	3-hydroxyadipate*	Lipid	Fatty Acid, Dicarboxylate	62069	LC/MS Polar	100004396	3131	161.046		151913	133894		HMDB00345	2.8507	0.3562	0.3003	0.2654	0.6966	6.6892	0.5052	0.128	1.496	0.7821	1.1182	0.128	0.3681	18.4832	1.0006	0.5791	0.3077	1.506	13.319	1.1904	1.2065	2.372	0.577	2.607	1.4886	1.5544	0.9994	1.3451	0.8648	3.8102	4.0899	27.7747	0.1994	0.2437	0.4581	0.4109
3711	3-hydroxybenzoate	Xenobiotics	Benzoate Metabolism	15673	LC/MS Neg	100000013	1141	137.024	99-06-9	7420	7142	C00587	HMDB02466	0.0896	0.0896	0.0896	0.0896	0.0896	4.7409	0.0896	0.0896	1.2196	0.0896	0.3022	0.0896	0.0896	0.6216	1.9136	0.0896	2.6913	0.2996	2.5977	0.0896	0.0896	2.7319	0.0896	1.6016	0.5763	3.9382	0.0896	0.9116	0.825	6.7628	0.937	0.7566	0.0896	0.3615	1.1223	0.0896
1501	3-hydroxybutyrate (BHBA)	Lipid	Ketone Bodies	542	LC/MS Polar	254	1444	103.04	625-72-9	441	428	C01089	HMDB00357	0.2185	0.5828	0.2185	0.6595	0.3126	1.761	0.5852	0.4114	1	0.5393	0.2185	0.2185	0.442	3.8049	2.2933	2.568	1.1932	0.7931	1.063	2.6601	3.1274	8.0041	1.5733	2.6189	2.2054	0.6132	0.7503	0.7269	0.866	16.4176	0.3756	1.3222	0.2185	0.2185	3.5739	0.5032
1536	3-hydroxydecanoate	Lipid	Fatty Acid, Monohydroxy	22053	LC/MS Neg	100000997	4634.7	187.134	5561-87-5	26612	24790		HMDB02203	1.8576	0.8475	0.2288	0.2288	0.5893	1.1254	0.2545	0.2288	0.8757	0.7767	0.524	0.2288	0.2288	1.6748	0.9022	0.5963	1.2516	1.0961	4.1392	1.3926	0.753	1.4256	1.9379	2.5456	0.9039	1.9137	2.1503	1.1038	0.5553	1.977	0.6845	2.4581	0.2288	0.2288	1.6369	1.5699
1533	3-hydroxyhexanoate	Lipid	Fatty Acid, Monohydroxy	53230	LC/MS Neg	100006367	1725	131.071	10191-24-9	151492	133518			0.426	0.2118	0.4204	0.2118	0.2118	2.1799	0.2118	0.2118	0.2118	0.2118	0.3663	0.2118	0.2118	5.9453	1.5004	0.4933	6.6437	0.2118	3.6104	0.4167	0.2118	5.1554	0.8706	1.6061	0.2118	2.6291	5.4616	1.1638	0.2118	3.3362	0.3367	1.025	0.2118	0.2118	0.8184	0.5253
1538	3-hydroxylaurate	Lipid	Fatty Acid, Monohydroxy	32457	LC/MS Neg	100001112	5175	215.165	53941-38-1	94216	85026		HMDB00387	2.8647	1.3673	0.6482	0.8381	0.3377	2.2089	0.3397	0.2995	0.9842	1.6705	0.7129	0.4995	0.659	3.6747	0.3152	1.3281	4.556	0.4927	0.6882	1.0158	0.3736	1.0192	0.7341	1.1375	2.7929	3.2739	1.1514	1.7915	1.4938	2.9428	0.4544	2.561	0.2966	0.3603	1.5038	0.8928
1540	3-hydroxymyristate	Lipid	Fatty Acid, Monohydroxy	21158	LC/MS Neg	100000882	5335	243.197	3422-31-9	16064	15252			2.8933	1.0472	0.6924	0.6767	0.3435	1.3119	0.4159	0.1856	2.9786	2.7393	1.0234	0.3476	0.9327	3.3279	0.345	2.544	7.1958	0.3625	0.9963	1.7304	0.3164	0.602	0.4185	0.3501	5.3102	1.2729	2.1174	1.2186	0.9149	0.817	0.2459	2.5235	0.1856	0.4448	0.7605	1.3497
1534	3-hydroxyoctanoate	Lipid	Fatty Acid, Monohydroxy	22001	LC/MS Neg	100000773	3446	159.103	88930-08-9	26613	24791		HMDB01954	0.6006	0.3445	0.5715	0.3445	0.3445	2.0598	0.3445	0.3445	0.3445	0.3445	0.3445	0.3445	0.3445	2.3432	0.7624	0.3445	1.8731	0.3641	2.995	0.6712	0.3445	2.1539	0.5986	1.123	0.5523	1.3651	2.0716	0.8713	0.3445	1.9985	0.6315	0.877	0.3445	0.3445	1.144	0.3445
1542	3-hydroxyoleate*	Lipid	Fatty Acid, Monohydroxy	61843	LC/MS Neg	100019966	5508	297.244						0.6871	0.6348	0.9045	0.5235	0.1202	0.1202	0.8732	0.7952	1.0464	0.1388	0.3935	0.1202	1.0108	0.1202	0.1202	0.7053	2.883	0.1202	0.2156	4.7125	0.1202	1	0.1202	0.1202	10.6295	0.1202	0.1202	0.6024	0.1202	0.3357	1.0523	7.4202	5.7842	22.606	25.2675	1.41
1458	3-hydroxyoleoylcarnitine	Lipid	Fatty Acid Metabolism(Acyl Carnitine)	61840	LC/MS Pos Late	100019801	1406	442.353			48061587			0.3357	0.3357	0.3357	0.3357	0.3357	9.1615	0.3357	0.3357	0.3357	0.3357	0.3357	0.3357	0.3357	49.2436	0.3706	0.3357	7.0717	0.4773	0.8234	0.3357	1	0.3357	0.3357	4.3366	0.7855	3.9165	0.9029	0.6251	0.3357	3.5805	0.3357	0.5006	0.3357	0.3357	0.3357	0.3357
1541	3-hydroxypalmitate	Lipid	Fatty Acid, Monohydroxy	27503	LC/MS Neg	100000983	5476	271.228	928-17-6	301590	266538		HMDB10734	2.8423	0.5051	0.5094	0.107	0.3176	3.9675	0.5174	0.107	6.6004	0.1916	2.3178	0.107	0.107	3.8209	0.798	1.0476	7.003	0.107	0.9524	6.7091	0.1898	0.107	0.107	0.2788	4.5619	0.4492	2.235	1.6831	0.831	0.6498	0.6857	5.9934	0.3647	0.3383	0.7837	2.5869
1493	3-hydroxypalmitoylcarnitine	Lipid	Fatty Acid Metabolism(Acyl Carnitine)	61839	LC/MS Pos Late	100019800	1380	416.337						0.2599	0.2599	0.2599	0.2599	0.2599	13.5465	0.2599	0.2599	0.2599	0.2599	0.2599	0.2599	0.2599	16.4191	0.4563	0.2599	1.793	1.4927	1.4447	0.5068	1.3322	0.8055	0.6877	2.1396	0.2599	2.0578	0.4575	0.4161	0.7672	6.2774	0.2599	0.8567	0.2599	0.2599	0.2599	0.4042
128	3-hydroxyphenylacetate	Amino Acid	Phenylalanine Metabolism	1413	LC/MS Polar	114	1220	151.04	621-37-4	12122	5323739	C05593	HMDB00440	0.5168	0.4842	0.4707	0.6465	0.4421	0.2664	0.5167	0.2664	3.3387	0.5696	1.3219	0.2664	0.2664	0.2664	0.2664	0.3536	1.0621	1.0984	5.6287	0.4755	0.2664	10.4808	1	1.4638	1.3872	0.2664	0.4182	2.8207	0.2664	0.2664	1.6049	2.3182	0.2664	0.5383	0.3461	1.9691
4452	3-hydroxyquinine	Xenobiotics	Drug - Antibiotic	43496	LC/MS Pos Early	100002410	3271	341.186	78549-61-8	441264	138373	C07344	HMDB01091	0.1069	0.1069	0.1069	0.1069	0.1069	0.1069	0.1069	0.1069	0.1069	0.1069	0.1069	0.1069	0.1069	0.1069	0.1069	0.1069	0.1069	0.1069	0.1069	0.1069	0.1069	0.1069	0.1069	0.1069	1.8931	0.1069	0.1069	0.1069	0.1069	0.1069	0.1069	0.1069	0.1069	0.1069	0.1069	0.1069
1537	3-hydroxysebacate	Lipid	Fatty Acid, Monohydroxy	31943	LC/MS Neg	100001145	1282	217.108	73141-46-5	3017884	2285525		HMDB00350	0.7114	0.1731	0.1731	0.1731	0.1731	2.5389	0.1731	0.1731	0.5798	0.3214	0.1731	0.1731	0.1731	1.4755	0.5585	0.1731	3.831	1.7119	0.1731	0.1731	0.8224	7.6976	0.7474	0.6817	0.3928	1.1216	0.2721	0.4733	0.1731	1.02	1.0979	1.1239	0.1731	0.1731	0.1731	0.1731
4142	3-hydroxystachydrine*	Xenobiotics	Food Component/Plant	62062	LC/MS Pos Early	100020203	1049	160.097		442640	391002			0.1187	0.1187	0.337	0.1187	0.1187	87.91	0.1187	0.3561	0.6064	0.1187	0.9826	0.1187	0.1187	5.4096	0.1225	0.1187	0.1187	0.1187	0.6912	0.1187	0.1187	0.1187	2.8415	5.7977	1.0174	97.9728	0.1187	3.8544	0.1187	0.645	2.7027	0.2481	0.1187	0.1187	0.1187	0.1187
1572	3-hydroxystearate	Lipid	Fatty Acid, Monohydroxy	52938	LC/MS Neg	100008933	5674	299.259	45261-96-9	5282907	4446034			0.5206	0.6042	1.8456	0.3696	0.4058	0.3871	0.0489	0.0489	0.6916	0.3681	2.6648	0.0489	1.623	0.6291	0.1632	2.5529	2.6506	2.1987	0.2999	11.2449	0.0976	1.6246	0.2926	0.1948	12.2115	0.122	1.0593	1	0.4327	0.0489	3.5671	7.1966	1.1832	7.2618	35.4701	3.866
2411	3-ketosphinganine	Lipid	Sphingolipid Synthesis	34381	LC/MS Pos Late	100001436	1400	300.29	18944-28-0	631	611	C02934	HMDB01480	0.2008	0.2008	0.2008	0.2008	0.2008	6.594	0.2008	0.2008	0.2008	0.2008	0.2008	0.2008	0.2008	2.9983	0.2008	0.2008	0.7665	1.1133	0.8038	0.2008	0.7755	0.4395	0.8282	3.5732	0.7885	0.3598	1.1945	2.4312	1.2274	1.3869	0.2008	1.0445	0.2008	0.2008	1.2116	0.4625
318	3-methyl-2-oxobutyrate	Amino Acid	Leucine, Isoleucine and Valine Metabolism	44526	LC/MS Polar	100000936	911	115.04	3715-29-5	49	48	C00141	HMDB00019	0.2374	0.0353	0.0353	0.0353	0.0353	1.9225	0.0353	0.0353	0.2386	0.0353	0.227	0.0501	0.0353	4.9031	0.267	5.9575	0.0353	5.0998	0.2973	6.7845	1.4979	0.7686	0.3873	0.0353	2.5905	0.9896	2.9908	0.0745	1.5085	0.0353	0.0353	3.2928	0.0353	0.0353	0.7792	1.4007
296	3-methyl-2-oxovalerate	Amino Acid	Leucine, Isoleucine and Valine Metabolism	15676	LC/MS Neg	100000036	2064.2	129.056	1460-34-0;51829-07-3	47	46	C00671	HMDB03736	1.0743	0.0195	0.0195	0.0195	0.0524	3.5848	0.0195	0.0195	0.2796	0.0585	0.3245	0.0195	0.0195	6.1812	0.4715	5.4973	0.3644	4.9122	0.3593	7.6489	2.3736	1	1.8659	0.7451	2.1955	1.7717	2.7893	0.3562	2.7844	0.4372	0.0333	2.201	0.0195	0.0195	0.9371	0.9646
1317	3-methyladipate	Lipid	Fatty Acid, Dicarboxylate	36749	LC/MS Polar	100001765	2865	159.066	3058-01-03	12292	11789		HMDB00555	1.4404	1.0484	0.0473	0.0473	3.3131	0.298	0.3212	0.0473	0.0473	0.0473	3.7686	0.0473	0.0473	2.8698	0.1872	3.4198	0.6445	0.3939	7.8017	15.0365	0.4362	0.5408	1.5646	0.1922	0.9516	0.2631	5.5062	0.4274	10.7548	0.1416	0.1829	0.3743	0.2642	1.8809	6.3045	4.593
1310	3-methylglutarate/2-methylglutarate	Lipid	Fatty Acid, Dicarboxylate	54676	LC/MS Polar	100010834	2832	145.051			11781		HMDB00752	9.0695	0.3328	0.1707	0.0911	0.4165	0.6286	0.5046	0.0352	0.3542	0.3235	1.0181	0.0352	0.228	2.1786	0.4821	1.5381	2.1727	1.5179	0.8435	4.5189	3.8332	1.7118	11.9718	0.4457	3.2749	0.4421	2.7832	1.7108	2.7321	0.7054	0.8138	1.0374	0.068	0.2993	1.2755	0.6363
67	3-methylhistidine	Amino Acid	Histidine Metabolism	15677	LC/MS Pos Early	100000042	2670	170.092	368-16-1	64969	58494	C01152	HMDB00479	7.6887	0.1787	0.0804	0.0804	0.1914	14.8746	0.803	0.1803	5.2491	0.0804	0.9297	0.0804	0.0804	2.198	0.9682	0.1913	1.4173	0.2265	0.2722	1.6545	0.9002	10.73	2.7691	67.5568	1.4793	1.686	3.3564	0.9179	0.5092	1.8912	3.0432	0.7262	0.0804	0.0804	0.9167	0.1776
3787	3-methylxanthine	Xenobiotics	Xanthine Metabolism	32445	LC/MS Pos Early	100001108	1415	167.056	1076-22-8	70639	63805	C16357	HMDB01886	0.1137	0.5582	0.5822	1.4092	0.1137	6.2751	0.1137	0.1137	0.6802	0.9557	0.1137	0.1137	0.1137	1	3.0912	0.1137	0.1137	0.1137	0.1137	0.1137	1.5077	1.4084	0.5003	0.6732	0.1137	3.5883	0.1137	0.1137	0.1137	4.7393	0.2872	0.4852	0.1137	0.1137	0.8159	0.1137
3774	3-phenylpropionate (hydrocinnamate)	Xenobiotics	Benzoate Metabolism	15749	LC/MS Neg	100000010	2860	149.061	501-52-0	107	10181339	C05629	HMDB00764	0.947	0.1076	0.6615	0.0366	0.2643	0.4643	0.0937	0.0359	0.1036	0.392	1.8523	0.0428	0.0149	4.2501	4.0729	0.2708	10.7408	0.5338	6.6286	1.6784	0.839	6.5398	1.8122	1.3645	3.4688	15.4408	3.6577	9.9746	0.6064	0.1454	1.4439	1.053	0.0345	0.4553	2.3433	1.4172
363	3-sulfo-L-alanine	Amino Acid	Methionine, Cysteine, SAM and Taurine Metabolism	47089	LC/MS Pos Early	382	570	170.012	498-40-8	72886	65718	C00506	HMDB02757	0.2609	0.4076	0.2609	0.2609	0.2609	3.5294	0.2609	0.2609	0.2609	0.2609	0.2609	0.2609	0.2609	2.1886	0.3415	0.5028	1.3623	0.4838	0.4318	2.3997	0.9525	2.2139	0.926	5.4864	1.1409	0.6191	1.4222	0.8433	1.0179	2.7761	0.2609	4.278	0.2609	0.2609	0.8016	0.3586
3496	3-ureidoisobutyrate	Nucleotide	Pyrimidine Metabolism, Uracil containing	57549	LC/MS Pos Early	100001531	1207	147.076	2905-86-4	160663	141172	C05100	HMDB02031	0.155	0.7041	0.1027	0.1027	0.1027	4.2732	0.1027	0.1027	1.7736	0.1027	1.6188	0.174	2.1824	1.2183	1.5882	1	0.2621	0.8495	0.4734	7.6234	0.1027	0.9635	0.1027	1.8259	1.8216	1.5335	0.3831	0.2672	0.6109	6.7382	0.3654	1.6387	0.1027	0.2288	2.0343	0.3134
3497	3-ureidopropionate	Nucleotide	Pyrimidine Metabolism, Uracil containing	3155	LC/MS Pos Early	1053	875	133.061	462-88-4	111	109	C02642	HMDB00026	0.634	0.112	0.0107	0.0107	0.097	1.3444	0.1651	0.0107	0.6607	0.0694	0.6096	0.0107	0.0741	2.268	1	2.4966	0.8551	1.9814	0.3762	6.8776	0.1102	1.2855	0.4054	4.6269	2.3255	1.8256	1.4757	0.0681	1.095	3.0088	0.0715	4.705	0.0107	0.0107	0.3658	4.5775
2814	3b-hydroxy-5-cholenoic acid	Lipid	Secondary Bile Acid Metabolism	43507	LC/MS Neg	100004182	5205	373.275	5255-17-4	92997	83950		HMDB00308	1.5833	0.0511	0.0511	0.6396	0.3374	1.7163	0.2302	0.0511	0.3654	1.2409	1.4667	0.1037	0.0511	0.7318	0.2277	2.6425	2.5476	1.1341	1.2706	1.6379	0.7426	2.2231	0.4988	3.0169	2.7685	1.874	1.1254	3.8379	0.8797	2.7657	0.1702	1.0202	0.0854	0.3512	0.8545	0.4828
4884	4-acetamidobenzoate	Xenobiotics	Chemical	57585	LC/MS Neg	100009413	1403	178.051	556-08-1	19266	18177	D03836		0.2514	0.2514	0.2514	0.2514	0.2514	0.6779	0.2514	0.2514	0.2514	0.2514	0.2514	0.2514	0.2514	0.2514	0.2514	0.2514	0.2514	0.2514	0.8199	0.9215	0.2514	1.809	0.2514	3.1312	1.2511	0.2514	0.9813	0.2514	1.0187	1.9179	0.2514	0.2514	0.2514	0.2514	0.2514	0.2514
424	4-acetamidobutanoate	Amino Acid	Polyamine Metabolism	1558	LC/MS Pos Early	1113	1350	146.081	3025-96-5	18189	17180	C02946	HMDB03681	0.2343	0.7775	0.3173	0.6095	1.7902	2.4332	1.8515	0.1499	1.0709	1.0983	0.7334	0.7915	0.6487	12.4795	0.3115	0.6038	1.6179	0.9623	0.8035	1.4149	0.1499	3.1055	0.1944	1.3592	0.1499	3.4851	1.0634	2.3655	0.1499	1.2583	1.515	0.1499	1.5513	0.3675	0.2227	0.1499
4338	4-acetamidophenol	Xenobiotics	Drug - Analgesics, Anesthetics	12032	LC/MS Neg	1383	2173.7	150.056	103-90-2	1983	1906	C06804	HMDB01859	0.2989	0.2989	0.2989	0.2989	0.2989	0.2989	0.2989	0.2989	0.2989	0.2989	0.2989	1.2776	0.876	0.2989	0.4904	1.0019	0.2989	8.2644	0.2989	0.2989	2.0124	0.2989	0.2989	0.2989	0.2989	0.2989	0.2989	0.9981	0.2989	0.2989	0.2989	0.2989	0.2989	0.2989	0.2989	0.2989
2586	4-cholesten-3-one	Lipid	Sterol	38125	LC/MS Pos Late	100002227	2520	385.346	601-57-0	91477	427	C00599	HMDB00921	0.4198	0.2062	0.2446	0.076	0.2084	18.2709	0.1923	0.1319	0.4824	0.3312	0.5224	0.8515	0.1322	4.9845	0.5832	2.8169	14.522	8.9179	0.9542	1.0307	1.1777	3.395	1.1673	5.9051	0.5645	3.1261	1.0202	7.1032	2.2888	23.3949	2.6692	0.9573	0.0758	0.4775	0.9423	0.5991
429	4-guanidinobutanoate	Amino Acid	Guanidino and Acetamido Metabolism	15681	LC/MS Pos Early	100000096	2320	146.092	463-003;463-00-3	500	486	C01035	HMDB03464	0.5571	0.6742	0.1445	0.095	0.5535	4.3464	0.2122	0.0139	0.4865	0.4519	1.0406	0.1366	0.547	16.1808	0.8545	2.5196	1.6653	2.6242	0.9914	3.0371	0.3878	2.6131	1.0232	4.8313	1.2745	1.0627	1.2607	0.4579	1.641	2.3735	0.4161	0.9424	0.0876	0.2442	1.1484	1.3054
3710	4-hydroxybenzoate	Xenobiotics	Benzoate Metabolism	21133	LC/MS Neg	100000862	820	137.024	99-96-7	135	132	C00156	HMDB00500	0.4504	0.1821	0.1821	0.1821	0.1821	16.7555	0.1821	0.1821	6.1732	0.1821	0.652	0.1821	0.1821	10.7249	0.5874	0.6166	0.2317	1.7349	0.1821	1.1851	0.7012	1.1849	0.3706	4.1799	0.5836	9.0901	1.7664	0.1821	0.1821	4.8704	0.4922	1.554	0.1821	0.1821	0.1821	0.4702
4256	4-hydroxycinnamate	Xenobiotics	Food Component/Plant	36770	LC/MS Neg	100001675	1457	163.04	501-98-4	637542	553148	C00811	HMDB02035	0.1121	0.1121	0.1121	0.1121	0.3866	6.7314	0.1121	0.1121	2.494	0.1121	0.4843	0.1121	0.1121	2.4743	0.7558	0.2223	2.0025	0.8328	5.8797	8.2934	1	0.6811	0.1121	0.4394	1.5625	3.2022	0.7131	0.4526	0.1121	1.0999	0.1121	1.9911	0.1121	0.1268	0.5078	0.2761
3921	4-hydroxycyclohexylcarboxylic acid	Xenobiotics	Food Component/Plant	43516	LC/MS Pos Early	100004250	2005	127.075	17419-81-7	151138	133210	C04404	HMDB01988	0.3173	0.1081	0.1081	0.3111	0.7516	8.6131	0.1081	0.1081	0.7922	0.3272	0.4145	0.1081	0.1081	0.2642	1.3534	0.5672	1.618	0.9058	1.8534	0.4827	1.0942	3.8224	0.4773	0.1081	2.1954	1.7995	0.3914	1.5683	4.1898	0.886	3.3832	0.5319	0.1081	1.5115	1.8498	0.1875
47	4-hydroxyglutamate	Amino Acid	Glutamate Metabolism	40499	LC/MS Pos Early	100002544	1141	164.055	2485-33-8	439902	388936	C03079	HMDB01344	0.5943	0.3443	0.3443	0.3443	0.3443	6.213	0.3443	0.3443	0.7098	0.3443	0.3443	0.3443	0.3443	2.8528	0.3443	0.3443	1.1857	0.8576	0.3443	3.4264	0.3443	3.1679	0.3443	0.8188	0.6822	0.9766	0.3443	1.02	1.6252	0.3443	0.6371	2.0573	0.3443	0.3443	0.3443	0.98
127	4-hydroxyphenylacetate	Amino Acid	Phenylalanine Metabolism	541	LC/MS Neg	144	1361	151.04	156-38-7	127	3881560	C00642	HMDB00020	0.1089	0.3407	0.1836	0.1036	0.1783	10.2505	0.2232	0.1036	5.3185	0.651	2.469	0.1036	0.1036	2.3037	1.0078	0.9922	1.4921	1.0782	0.8444	3.8038	1.031	5.1891	0.5544	3.6851	3.6843	0.6536	0.7233	0.2797	0.9691	16.9217	1.1964	1.7378	0.1036	0.2273	1.1878	0.4896
142	4-hydroxyphenylpyruvate	Amino Acid	Tyrosine Metabolism	1669	LC/MS Neg	1141	1690	179.035	156-39-8	979	954	C01179	HMDB00707	1.9121	0.037	0.037	0.037	0.059	1.362	0.037	0.037	0.1981	0.037	0.3259	0.037	0.037	3.2087	0.627	2.9868	0.037	3.5441	0.1776	3.7044	0.7679	1.0047	1.4975	1.1933	0.9953	0.8537	3.3478	0.1081	0.2331	0.1651	0.037	1.7542	0.037	0.037	1.0247	1.0078
85	4-imidazoleacetate	Amino Acid	Histidine Metabolism	32349	LC/MS Pos Early	100001207	2055	127.05	645-65-8	96215	86856	C02835	HMDB02024	0.6209	0.1561	0.2085	0.0648	0.1751	5.3882	0.1447	0.0271	2.2409	0.253	0.5247	0.0595	0.9046	3.4519	1.0259	2.4915	1.0795	0.4067	0.32	1.4057	3.5007	10.0084	5.4505	1.5236	2.0336	3.7131	0.74	5.8927	0.294	1.3621	1.7493	0.6819	0.1489	0.0271	0.3256	1.116
261	4-methyl-2-oxopentanoate	Amino Acid	Leucine, Isoleucine and Valine Metabolism	22116	LC/MS Neg	100000551	2170	129.056	816-66-0	70	69	C00233	HMDB00695	1.1088	0.0102	0.0102	0.0102	0.0612	2.7977	0.0102	0.0102	0.2924	0.0621	0.3576	0.0102	0.0102	5.1765	0.4355	4.3479	0.354	4.2556	0.3471	5.412	1.9308	1	1.5727	0.7267	1.2694	1.4586	2.6362	0.367	2.0879	0.392	0.0438	2.1791	0.0102	0.0102	0.9401	0.9456
3724	4-methylcatechol sulfate	Xenobiotics	Benzoate Metabolism	46146	LC/MS Neg	100004111	2665	203.002						0.3421	0.3421	0.3421	0.3421	1.6099	2.5366	0.3421	0.3421	0.3421	0.3421	0.574	0.3421	0.3421	11.1411	0.7296	0.3421	1.7992	0.3421	0.4505	0.3421	0.3421	1.0099	0.3421	1.5539	0.3421	0.3421	0.3421	0.3421	0.3421	0.3421	4.4157	0.4159	0.3421	0.5676	0.3421	0.3421
334	4-methylthio-2-oxobutanoate	Amino Acid	Methionine, Cysteine, SAM and Taurine Metabolism	40732	LC/MS Neg	100003712	1635	147.012	583-92-6	473	460	C01180	HMDB01553	0.8077	0.0891	0.0891	0.0891	0.0891	2.2222	0.0891	0.0891	0.0891	0.0891	0.2245	0.0891	0.0891	6.3852	0.7465	6.5827	0.0891	5.2478	0.0891	2.0304	0.9878	2.1234	1.1757	0.303	0.4072	0.8437	3.9162	0.0891	0.7389	0.4861	0.0891	1.9474	0.0891	0.0891	1.0122	0.7915
3495	4-ureidobutyrate	Nucleotide	Pyrimidine Metabolism, Uracil containing	22118	LC/MS Pos Early	100000718	1095	147.076	2609-10-01	1571307	1278628			0.5467	0.4231	0.0783	0.104	0.538	2.0188	0.2453	0.0616	0.4385	0.3448	0.7656	0.0624	0.6523	0.8027	1	10.7492	1.6413	9.1249	2.1799	4.2369	1.093	2.2172	1.5141	0.4615	1.5082	2.8318	2.0637	1.2749	2.9384	0.7572	1.3691	1.6275	0.0616	0.1602	0.4986	1.5331
3481	5,6-dihydrouridine	Nucleotide	Pyrimidine Metabolism, Uracil containing	61833	LC/MS Neg	100001425	1119	245.078	5627-05-04	94312	85115			0.5304	0.2287	0.0352	0.0352	0.082	3.4448	0.1019	0.0352	0.9898	0.5193	0.0508	0.0352	0.0352	4.6929	1.6066	0.3138	2.9024	0.7975	1.6743	0.7075	2.0929	3.6656	2.2217	0.6076	1.3684	2.2426	0.3493	3.1485	0.1876	2.5358	0.8038	1.0102	0.0352	0.1599	1.7827	1.3185
3659	5-(2-Hydroxyethyl)-4-methylthiazole	Cofactors and Vitamins	Thiamine Metabolism	27673	LC/MS Pos Early	100000098	2310	144.048	137-00-8	1136	1104	C04294		6.6625	0.6474	0.3714	0.4788	0.6503	0.6908	0.3423	0.2118	1.1211	17.7287	26.8278	0.6263	2.1667	30.1267	0.2811	0.7446	1.0622	0.2217	0.9048	5.2981	1.3358	0.7458	0.9378	0.5082	2.8261	0.8225	6.6166	1.2199	2.5744	0.7231	1.219	2.7875	0.7446	0.2129	0.5178	5.2781
3789	5-acetylamino-6-amino-3-methyluracil	Xenobiotics	Xanthine Metabolism	34424	LC/MS Polar	100001403	1710	197.068	1196153-01-1	88299	79659	C16366	HMDB04400	1.0191	0.6945	1.4738	0.3854	1.3187	1.3044	0.2835	0.0679	0.287	0.9296	1.3769	0.1451	0.3179	0.4917	1.6849	0.6677	1.8421	0.7896	5.2463	2.3055	4.7994	0.2773	0.5169	1	2.6157	2.1074	1.9976	0.8521	8.1389	3.4298	0.7687	3.6854	0.1268	0.5434	2.7556	0.4147
3790	5-acetylamino-6-formylamino-3-methyluracil	Xenobiotics	Xanthine Metabolism	34401	LC/MS Polar	100001402	1424	225.063	85438-96-6	108214	97287	C16365	HMDB11105	0.0549	0.0549	1.2611	0.0549	0.9278	1.3641	1.8346	0.0549	0.6024	0.212	1.6599	0.0549	0.0549	0.6713	0.8332	0.0549	0.7841	0.0549	6.4826	0.0549	0.0549	0.0549	0.0549	3.4595	0.0549	1.1524	0.1516	0.5364	0.0549	1.0076	0.9924	0.0549	0.0549	0.8581	0.3223	0.0549
4800	5-aminoimidazole-4-carboxamide	Xenobiotics	Chemical	39579	LC/MS Polar	100002772	1326	125.047	360-97-4	9679	9298	C04051	HMDB03192	0.6056	0.8476	0.2979	0.2979	2.2268	0.2979	0.9577	0.2979	1.3549	2.1803	2.319	0.2979	0.8575	0.6698	0.2979	2.4699	0.2979	0.9331	2.3675	3.2695	0.2979	14.185	0.2979	0.2979	4.2559	0.4618	0.7953	0.2979	0.2979	0.2979	0.2979	1.0423	0.2979	0.2979	0.2979	0.9062
114	5-aminovalerate	Amino Acid	Lysine Metabolism	18319	LC/MS Pos Early	100000454	2220	118.086	660-88-8	138	135	C00431	HMDB03355	2.042	0.6749	0.5786	0.2934	1.9543	14.25	1.1615	0.0589	0.3646	0.3256	3.9797	0.1391	0.9658	1.2441	1.3207	0.7375	4.4837	0.1565	1.381	1.1688	0.1817	1.4074	0.4407	15.9204	2.6027	1.9316	2.2058	0.4532	0.5803	16.8041	0.3229	1.1899	0.1109	0.2142	0.6742	0.5632
1173	5-dodecenoate (12:1n7)	Lipid	Medium Chain Fatty Acid	33968	LC/MS Neg	100001232	5224	197.155	2430-94-6	5312378	4471803		HMDB00529	0.0341	0.0341	0.0341	0.0341	0.0341	0.3885	0.0341	0.0341	0.0341	0.0341	1.7769	0.0341	0.0341	0.1685	0.1993	1.9803	2.9828	0.0341	1.2407	0.2087	0.0341	0.3492	0.0341	0.3572	1.8452	1.6757	0.0485	1.0885	0.8414	6.1052	1.1314	0.4595	0.0341	0.0341	1.7459	0.1364
1546	5-hydroxyhexanoate	Lipid	Fatty Acid, Monohydroxy	31938	LC/MS Neg	100001148	1267	131.071	44843-89-2	170748	149280		HMDB00525	2.7369	1.1221	0.5227	0.2894	0.7936	0.268	0.1599	0.0167	0.128	0.7404	1.0928	0.029	0.2103	1.1162	1.6938	2.3741	3.8402	4.0056	4.6053	6.5515	0.1901	0.7267	0.6152	0.1894	3.6957	0.1991	2.9974	4.761	1.603	0.9072	2.3591	2.2927	0.0758	0.7555	4.192	0.4773
234	5-hydroxyindoleacetate	Amino Acid	Tryptophan Metabolism	437	LC/MS Pos Early	71	1893	192.066	54-16-0	1826	1760	C05635	HMDB00763	0.293	0.293	0.293	0.293	0.293	0.293	0.293	0.364	2.1228	0.293	0.293	0.293	0.293	0.293	1.5481	0.293	0.293	0.293	0.293	0.293	0.3039	4.2096	0.293	0.6945	0.3717	0.293	0.293	0.293	0.293	1.3934	1.6361	1.3639	0.293	0.6978	0.293	0.293
99	5-hydroxylysine	Amino Acid	Lysine Metabolism	15685	LC/MS Pos Early	100000054	2790	163.108	13204-98-3	1029	1002	C16741	HMDB00450	5.0982	0.1868	0.1868	0.1868	0.1868	6.6929	3.1655	0.1868	0.9582	0.1868	0.6294	0.1868	0.1868	2.6605	0.8922	0.2212	1.8994	1	0.7211	1.5154	0.9775	4.4068	3.0874	10.4412	0.7831	4.2406	1.2442	1.3054	0.1868	0.5724	2.1133	0.5021	0.1868	0.1868	0.1868	0.2816
3926	5-hydroxymethylfurfural	Xenobiotics	Food Component/Plant	37429	LC/MS Pos Early	100002057	1542	127.039	67-47-0	237332	207215	C11101	HMDB34355	0.9345	0.7603	0.4944	0.9279	0.5285	3.2763	0.3606	0.2157	1.7781	1.0543	1.0995	0.2843	0.2157	1.2317	0.5987	1.5001	2.0658	1.8229	0.9357	1.3603	2.949	1	0.2736	0.8032	1.6054	1.1494	0.7459	1.2283	1.9165	2.3283	0.9881	0.987	0.2888	0.3247	1.8633	0.3655
419	5-methylthioadenosine (MTA)	Amino Acid	Polyamine Metabolism	1419	LC/MS Pos Early	212	2752	298.097	2457-80-9	439176	388321	C00170	HMDB01173	0.3221	0.0287	0.0287	0.1213	0.0287	2.6857	0.0287	0.1045	0.1857	0.0287	0.0287	0.0287	0.0287	1.7026	2.1515	0.0287	0.6702	0.0287	0.0287	0.0287	0.0287	3.17	0.0287	10.1327	0.0287	0.6324	0.0287	0.0287	0.0287	2.0773	2.765	0.0287	0.0287	0.0287	0.0287	0.0287
3483	5-methyluridine (ribothymidine)	Nucleotide	Pyrimidine Metabolism, Uracil containing	35136	LC/MS Neg	100001446	1778.1	257.078	1463-10-1	445408	393058		HMDB00884	0.2347	0.0329	0.0153	0.0153	0.0153	1.5815	0.0153	0.0153	0.1526	0.0224	0.0153	0.0162	0.0153	1.7266	1.2894	0.602	2.6014	0.3409	0.8591	1.0997	1.522	2.2388	1	0.197	2.7679	0.6496	0.6749	2.1106	0.3275	1.3841	0.1156	2.0448	0.0153	0.0153	0.5676	2.7118
441	5-oxoproline	Amino Acid	Glutathione Metabolism	1494	LC/MS Neg	1021	738.5	128.035	98-79-3	7405	7127	C01879	HMDB00267	2.3782	1.3633	0.2064	0.2198	0.7475	1.4739	0.3684	0.1177	1.3918	0.6782	2.6075	0.1003	0.4085	1.83	0.354	4.2962	2.7289	0.8364	0.7172	11.389	0.8476	1.4894	1.1316	0.349	3.4447	2.0352	4.1558	0.683	2.2065	1.101	0.4683	5.8693	0.1649	0.2409	0.6613	5.4078
2699	5alpha-androstan-3alpha,17alpha-diol disulfate	Lipid	Androgenic Steroids	37182	LC/MS Neg	100002007	4547	225.07						0.3321	0.3321	0.3321	0.3321	0.3321	1.0605	0.3321	0.3321	0.3321	0.3321	0.3321	0.3321	0.3321	0.3321	0.3321	0.3321	0.3321	0.3321	0.3321	0.3321	1	0.3321	0.3321	0.3321	0.3321	0.3321	0.3321	0.3321	0.3321	0.3321	0.3321	0.3321	0.3321	0.3321	0.3321	0.3321
2698	5alpha-androstan-3alpha,17alpha-diol monosulfate	Lipid	Androgenic Steroids	37183	LC/MS Neg	100002008	5208	371.19						0.2452	0.2452	0.8461	1.5861	0.2452	3.3802	0.2452	0.2452	0.2452	0.2452	0.2452	0.2452	0.2452	0.9922	0.2452	0.2452	0.2452	0.417	0.2452	0.2452	4.6333	0.705	0.2452	1.9241	0.2452	2.6531	1.3451	0.2452	0.7841	0.3923	0.3204	0.2452	0.2452	0.2452	0.2452	0.2452
2719	5alpha-androstan-3alpha,17beta-diol disulfate	Lipid	Androgenic Steroids	37184	LC/MS Neg	100002017	4275	225.07						0.1625	0.1625	0.1625	0.1625	0.1625	0.1625	0.1625	0.1625	0.1625	0.1625	0.1625	0.1625	0.1625	0.1625	0.1625	0.1625	0.1625	0.1625	0.1625	0.1625	1.8375	0.1625	0.1625	0.1625	0.1625	0.1625	0.1625	0.1625	0.1625	0.1625	0.1625	0.1625	0.1625	0.1625	0.1625	0.1625
2717	5alpha-androstan-3alpha,17beta-diol monosulfate (1)	Lipid	Androgenic Steroids	37186	LC/MS Neg	100002018	4925	371.19						0.0475	0.0475	0.0475	0.8812	0.0475	1.1188	0.0475	0.0475	0.0475	0.0475	0.0475	0.0475	0.0475	0.0475	0.0475	0.0475	0.0475	0.0475	0.0475	0.0475	2.0887	0.0475	0.0475	0.069	0.0475	0.0475	0.0475	0.0475	0.0475	1.4041	0.0475	0.0475	0.0475	0.0475	0.0475	0.0475
2726	5alpha-androstan-3beta,17alpha-diol monosulfate (1)	Lipid	Androgenic Steroids	37188	LC/MS Neg	100002022	4806	371.19						0.3547	0.1372	2.7733	0.1372	0.1372	0.1372	0.1372	0.1372	0.1372	0.1372	0.1372	0.1372	0.1372	0.4051	0.4005	0.1372	1.7381	2.4579	0.6152	0.1372	1.2848	0.3521	0.1372	1.1798	0.1372	3.422	2.4101	0.1372	0.8202	0.1372	0.5882	0.1372	0.1372	0.1372	0.2202	0.1372
2725	5alpha-androstan-3beta,17beta-diol disulfate	Lipid	Androgenic Steroids	37190	LC/MS Neg	100001987	3880	225.07	571-20-0	242332		C12525	HMDB00493	0.5041	0.5041	0.5041	0.5041	0.5041	0.7562	0.5041	0.5041	0.5041	0.5041	0.5041	0.5041	0.5041	0.5041	1.1946	0.5041	0.5041	0.5041	0.5041	0.5041	6.0043	0.5041	0.5041	0.5041	0.5041	0.5041	0.5041	0.5041	0.5041	1.1092	0.5041	0.5041	0.5041	0.5041	0.5041	0.5041
2723	5alpha-androstan-3beta,17beta-diol monosulfate (1)	Lipid	Androgenic Steroids	37191	LC/MS Neg	100002023	4635	371.19						0.8638	0.1579	0.1579	0.1579	0.1579	0.1579	0.1579	0.1579	0.1579	0.1579	1.0641	0.1579	0.1579	1	0.1579	0.1579	1.0498	1.2667	0.6477	0.607	0.9367	0.1579	0.2403	0.2847	0.3009	9.0113	2.5601	17.7726	0.9598	0.1579	0.1579	7.066	0.1579	0.1579	0.2413	0.1579
2724	5alpha-androstan-3beta,17beta-diol monosulfate (2)	Lipid	Androgenic Steroids	37192	LC/MS Neg	100002024	4685	371.19						0.7739	0.7739	0.7739	0.7739	0.7739	0.7739	0.9047	0.7739	0.7739	0.7739	0.7739	0.7739	0.7739	0.7739	1	0.7739	0.7739	0.7739	0.7739	0.7739	6.5714	0.7739	0.7739	0.7739	0.7739	0.7739	0.7739	0.7739	0.7739	3.0063	0.7739	0.7739	0.7739	0.7739	0.7739	0.7739
2643	5alpha-pregnan-3beta,20alpha-diol disulfate	Lipid	Progestin Steroids	37198	LC/MS Neg	100001988	3962	239.085						0.1528	0.1528	0.1528	0.1528	0.1528	0.7825	0.1528	0.1528	0.1528	0.1528	0.1528	0.1528	0.1528	1.2175	0.1528	0.1528	0.1528	0.1528	0.1528	0.1528	4.5626	0.1528	0.1528	0.3927	0.1528	0.1528	0.1528	0.1528	0.1528	5.4223	0.5549	0.1528	0.1528	0.1528	0.1528	0.1528
2636	5alpha-pregnan-3beta,20alpha-diol monosulfate (1)	Lipid	Progestin Steroids	37199	LC/MS Neg	100002013	4928	399.221						0.3043	0.1684	2.9378	0.1684	1.0097	0.6659	0.1684	0.1854	0.6296	0.1684	1.6471	0.1684	0.1684	0.1684	0.1684	0.5276	5.8015	0.2077	3.6555	0.9903	0.7285	1.6205	1.274	0.1684	0.1894	1.1805	14.3113	0.9801	3.0962	0.4355	0.2193	1.1627	5.5224	0.1684	0.9669	0.1684
2637	5alpha-pregnan-3beta,20alpha-diol monosulfate (2)	Lipid	Progestin Steroids	37200	LC/MS Neg	100002014	5060	399.221						0.2986	0.2986	0.2986	0.2986	0.2986	0.7438	0.2986	0.2986	0.2986	0.2986	0.2986	0.2986	0.2986	0.3051	0.2986	0.2986	0.2986	0.2986	0.2986	0.2986	2.3473	0.2986	0.2986	0.2986	0.2986	0.2986	0.2986	0.2986	0.2986	3.7746	0.2986	0.2986	0.2986	0.2986	0.2986	0.2986
2634	5alpha-pregnan-3beta,20beta-diol monosulfate (1)	Lipid	Progestin Steroids	37196	LC/MS Neg	100002009	5180	399.221						0.853	0.853	0.853	0.853	0.853	0.853	0.853	0.853	0.853	0.853	0.853	0.853	0.853	0.853	0.853	0.853	0.853	0.853	0.853	0.853	1.147	0.853	0.853	0.853	0.853	0.853	0.853	0.853	0.853	0.853	0.853	0.853	0.853	0.853	0.853	0.853
2644	5alpha-pregnan-diol disulfate	Lipid	Progestin Steroids	46172	LC/MS Neg	100002015	4310	239.085		5127902	4302261			0.783	0.783	0.783	0.783	0.783	0.783	0.783	0.783	0.783	0.783	0.783	0.783	0.783	0.783	0.783	0.783	0.783	0.783	0.783	0.783	0.783	0.783	0.783	0.783	0.783	0.783	0.783	0.783	0.783	1.217	0.783	0.783	0.783	0.783	0.783	0.783
3568	6-hydroxynicotinate	Cofactors and Vitamins	Nicotinate and Nicotinamide Metabolism	27680	LC/MS Polar	100000809	2000	138.02	5006-66-6	72924	65756	C01020	HMDB02658	3.7483	0.4805	0.2553	0.2553	1.136	2.0055	0.3413	0.2553	0.5478	0.6871	3.2177	0.2553	0.3321	2.8331	0.3369	0.6917	0.5058	1.1698	0.3685	4.0478	0.2553	1.2937	25.9968	5.2066	1.7744	12.7456	1.1023	0.51	0.9086	2.2805	0.6954	1.0914	0.2553	0.4471	0.8146	0.4885
2798	6-oxolithocholate	Lipid	Secondary Bile Acid Metabolism	46336	LC/MS Neg	100001068	5033	389.27	2393-61-5	164960	144621			4.3728	0.3668	0.3438	0.1404	1	0.1404	0.5682	0.3753	0.1838	0.1404	0.456	0.1404	0.1404	3.3789	0.3354	3.5704	21.7367	1.9418	0.2837	1.902	2.6908	2.1738	1.8577	0.4387	2.6933	6.1874	0.5364	3.1051	4.4717	0.5701	0.6286	0.7515	0.3457	0.616	0.4577	0.3052
111	6-oxopiperidine-2-carboxylate	Amino Acid	Lysine Metabolism	43231	LC/MS Neg	100004499	965	142.051	34622-39-4	3014237	2282737		HMDB61705	1.0146	0.2619	0.2619	0.2619	0.2619	0.6866	0.2619	0.2619	1.2492	0.9344	0.484	0.2619	0.2619	1.2517	0.2815	0.551	1.332	0.9844	0.4413	3.1732	0.7522	0.734	1.6746	0.3192	2.073	0.4963	1.7922	0.6026	1.0193	0.4752	0.318	1.0153	0.2619	0.2619	1.0168	3.8117
2796	7,12-diketolithocholate	Lipid	Secondary Bile Acid Metabolism	31906	LC/MS Neg	100001070	4215	403.249	517-33-9	3080560	2338317			0.4602	0.4602	0.4602	0.4602	0.4602	66.5335	0.4602	0.4602	0.4602	0.4602	0.4602	0.4602	0.4602	0.4602	0.6374	0.4602	0.4602	0.4602	0.4602	0.4602	0.4602	0.4602	0.4602	0.4602	0.4602	0.4602	3.985	1.0131	0.4602	48.6597	0.4602	0.9869	0.4602	0.4602	0.4602	0.4602
2606	7-hydroxycholesterol (alpha or beta)	Lipid	Sterol	47890	LC/MS Pos Late	100005999	1930	367.336		107722			HMDB06119	0.3023	0.3023	0.3023	0.3023	0.3023	1.4529	0.3023	0.3023	0.3023	0.3023	0.4887	0.3023	0.3023	1.2273	1.1834	0.6314	0.3023	1.6531	0.3023	0.8655	2.3104	1.451	1.8681	1.883	0.3023	0.4765	0.5643	0.4943	0.8005	3.3518	1	0.606	0.3023	0.3023	0.3023	0.3023
2812	7-ketodeoxycholate	Lipid	Secondary Bile Acid Metabolism	31904	LC/MS Neg	100001063	4821	405.265	911-40-0	188292	163659		HMDB00391	0.0448	0.0448	0.2505	1	0.3247	186.916	0.0448	0.0448	0.0448	0.0448	4.7662	0.0448	0.0448	1.6182	1.0833	0.0448	1.1915	0.7131	0.9139	0.0448	0.7953	1.3055	0.1389	4.826	0.0448	0.5922	2.473	1.9188	0.3503	299.972	1.3005	0.7246	0.0448	0.0448	0.0448	0.0448
2799	7-ketolithocholate	Lipid	Secondary Bile Acid Metabolism	43830	LC/MS Neg	100001069	5082	389.27	4651-67-6	444262	392247		HMDB00467	0.3404	0.2647	0.0419	0.0419	0.0419	117.592	5.4517	4.1036	12.2402	45.6957	0.8563	0.288	0.0661	3.8328	0.9324	1.0874	0.0419	0.319	0.8389	0.4735	0.0419	0.8339	0.1536	18.9518	0.0419	1.0676	0.0419	0.0419	0.0419	124.319	2.3528	0.7268	0.0419	7.0589	0.0419	0.0419
3447	7-methylguanine	Nucleotide	Purine Metabolism, Guanine containing	35114	LC/MS Neg	100001456	1729.7	164.058	578-76-7	11361	10883	C02242	HMDB00897	0.3112	0.0685	0.0343	0.0343	0.0343	8.9478	0.0343	0.0343	4.8338	0.1766	0.1063	0.0343	0.0343	13.92	0.529	0.794	1.023	0.7076	0.5522	1.7767	5.0003	6.7201	5.1303	3.0422	0.8009	8.5216	0.977	0.8301	0.4023	5.7168	0.1073	1.3989	0.0343	0.0436	0.5552	1.1134
3781	7-methylurate	Xenobiotics	Xanthine Metabolism	39598	LC/MS Pos Early	100002241	1321	183.051	612-37-3	69160	62375	C16355	HMDB11107	0.0951	0.0951	0.0951	1	0.0951	5.6605	0.0951	0.0951	0.0951	1.6706	0.0951	0.0951	0.0951	0.5173	1.0514	0.0951	0.0951	0.0951	0.1012	0.0951	0.6161	0.2805	0.0951	0.0951	0.0951	1.3676	0.0951	0.0951	0.0951	2.4521	0.0951	0.1564	0.0951	0.0951	0.0951	0.0951
3788	7-methylxanthine	Xenobiotics	Xanthine Metabolism	34390	LC/MS Pos Early	100001396	1350	167.056	552-62-5	68374	61660	C16353	HMDB01991	0.2215	0.2215	0.2215	0.2215	0.2215	5.4024	0.2215	0.2215	0.2215	0.8725	0.5321	0.2215	0.2215	1	1.4696	0.2215	0.2215	0.2215	0.2215	0.2215	0.2215	0.2215	0.2215	0.5791	0.2215	0.2215	0.2215	0.2215	0.2215	6.6144	0.2215	0.2215	0.2215	0.2215	0.2215	0.2215
3457	8-hydroxyguanine	Nucleotide	Purine Metabolism, Guanine containing	38672	LC/MS Pos Early	100002744	951	168.052	5614-64-2	65154	58661	C20155	HMDB02032	0.4314	3.3125	0.1155	0.2785	0.5725	2.5067	1.1576	0.1863	4.5726	0.1962	2.1245	0.1155	1.3956	3.9309	1.0087	0.1155	1.6216	0.8606	0.2749	0.1155	0.388	2.6612	0.5077	6.7077	0.1155	0.648	0.2489	1	1.0731	11.1277	0.1155	0.1155	0.1155	0.2245	0.229	0.1155
1551	8-hydroxyoctanoate	Lipid	Fatty Acid, Monohydroxy	21239	LC/MS Neg	100000956	2300	159.103	764-89-6	69820	63018		HMDB61914	0.8498	0.5705	0.1911	0.1911	0.1911	1.995	0.1911	0.1911	1	1.2946	0.7518	0.1911	0.1911	2.759	0.7912	0.8059	1.5898	1.2277	0.8919	0.1911	0.7406	2.6339	0.1911	2.9359	1.0452	0.572	1.0569	0.9636	0.1911	0.8059	0.9679	0.8909	0.1911	0.1911	1.0231	1.048
1579	9,10-DiHOME	Lipid	Fatty Acid, Dihydroxy	38399	LC/MS Neg	179	5180	313.238	263399-34-4	9966640	8142232	C14828	HMDB04704	1.7828	0.8656	0.8149	0.9706	0.1359	2.4376	0.4504	0.194	1.2069	1.8901	0.4701	0.1743	0.0737	6.3035	0.6967	0.6247	7.8776	0.1762	0.9517	1.3042	1	3.4991	0.845	3.2928	3.3132	2.492	1.594	2.8734	0.0737	5.5229	0.5594	1.7256	0.31	2.9894	1.6446	0.452
4123	acesulfame	Xenobiotics	Food Component/Plant	48569	LC/MS Neg	100006203	1581	161.987	55589-62-3	36573	33607		HMDB33585	0.0733	0.0423	0.0423	2.8296	0.0423	0.0423	0.0423	0.0423	1.0008	0.0423	0.9992	0.0423	0.0949	0.0423	18.4806	0.0423	6.0043	0.4233	0.0423	0.0622	0.0423	0.0423	0.0423	0.0423	3.475	0.4797	7.9365	0.0423	0.9229	0.0423	0.0423	1.4486	0.0423	0.0423	0.0423	0.0423
415	acisoga	Amino Acid	Polyamine Metabolism	43258	LC/MS Pos Early	100004541	1813	185.128	106692-36-8	129397	114601			0.2681	0.2176	0.2176	0.2176	0.3539	4.7858	0.2176	0.2176	0.2176	0.3368	0.2176	0.2176	0.2176	2.3457	0.7956	0.2176	2.6116	1.4634	1.911	1.0457	0.6242	2.3988	0.601	1.0218	1	0.9698	0.5847	1.7351	0.4078	1.9021	0.2176	0.6265	0.2176	0.2176	0.8682	0.4672
1124	aconitate [cis or trans]	Energy	TCA Cycle	46173	LC/MS Polar	100001359	4260	173.009						2.5551	1.1388	0.2029	0.2295	2.4659	7.5691	1.204	0.2029	3.0617	1.868	2.0859	0.2029	0.5785	7.5286	0.6671	1.6575	1.1119	5.4374	0.4183	3.8678	0.9403	0.3266	2.9177	0.376	2.5769	0.2319	1.3338	0.3285	0.3806	0.3554	1.4702	2.5244	0.7975	0.4425	0.6559	0.7186
3412	adenine	Nucleotide	Purine Metabolism, Adenine containing	554	LC/MS Pos Early	880	2221	136.062	73-24-5	190	185	C00147	HMDB00034	1.0534	0.7386	1.677	0.7377	0.4127	0.6627	0.661	0.1416	0.4906	0.6518	3.2614	0.2888	0.9466	1.998	0.5752	2.2606	10.4921	3.3591	6.4081	2.5959	0.7651	2.9327	0.3844	3.9523	2.4503	1.8745	1.3874	0.2984	0.939	1.1181	3.8173	0.3898	0.1228	0.2532	0.6095	3.1264
3411	adenosine	Nucleotide	Purine Metabolism, Adenine containing	555	LC/MS Pos Early	798	2169	268.104	58-61-7	60961	54923	C00212	HMDB00050	4.2472	0.446	2.099	1.0758	0.168	0.9561	0.6677	0.1308	0.0751	0.1861	0.6067	0.7096	1.7162	0.9065	1.5394	1.4887	20.9454	1.7923	11.5698	0.6335	0.8159	2.5724	0.4674	6.1943	5.5043	0.8099	1.0439	0.7971	0.8144	2.9431	0.4536	1.1467	0.1454	0.368	0.3662	11.7813
3405	adenosine 3'-monophosphate (3'-AMP)	Nucleotide	Purine Metabolism, Adenine containing	35142	LC/MS Neg	100001449	1245	346.056	84-21-9	41211	10463793	C01367	HMDB03540	0.2053	0.2053	0.7165	0.432	1.1128	0.2053	0.4458	0.2053	0.2053	0.2787	0.8943	1.314	0.2053	0.2053	0.2053	0.2053	7.7562	0.2053	1.1057	0.2053	0.2053	0.2053	0.2053	0.2053	1.4711	0.2053	0.2053	0.2053	0.2053	0.2053	0.2053	0.2053	0.2053	0.6036	0.2053	27.3107
3408	adenosine-2',3'-cyclic monophosphate	Nucleotide	Purine Metabolism, Adenine containing	37467	LC/MS Neg	72	1793	328.045	37063-35-7	2024	1947	C02353	HMDB11616	0.053	0.053	0.053	0.053	0.053	0.053	0.053	0.053	0.053	0.053	1	0.2175	0.5106	0.053	0.053	0.053	6.5434	0.2562	3.8203	0.053	0.053	2.1125	0.053	0.053	0.8078	0.053	0.053	0.053	0.053	0.1737	2.3072	0.053	0.053	0.053	0.053	13.2641
1313	adipate (C6-DC)	Lipid	Fatty Acid, Dicarboxylate	21134	LC/MS Polar	100000863	3000	145.051	124-04-9	196	191	C06104	HMDB00448	2.556	0.1715	0.1431	0.1353	0.7168	0.4379	0.4768	0.0305	0.8594	0.7536	1.2092	0.0337	0.2178	5.0675	0.716	0.8761	3.2435	2.14	1.6795	5.2247	3.8689	0.8972	2.431	0.4529	3.1061	1.3401	1.8988	3.0837	2.3176	0.4719	1.1028	2.0345	0.0743	0.4111	1.4515	0.8323
1233	adrenate (22:4n6)	Lipid	Polyunsaturated Fatty Acid (n3 and n6)	32980	LC/MS Neg	100001193	5678	331.264	2091-25-0	5497181	4445971	C16527	HMDB02226	2.4675	1.7445	0.1608	0.237	0.1608	1.1498	0.1608	0.1608	0.2588	0.2295	0.1608	0.1608	0.3589	0.9787	0.9255	0.1608	0.9882	0.1608	0.8502	0.8833	1	1.1256	1.0134	1.5197	0.8276	1.0466	1.8694	1.9476	1.3004	1.207	2.7066	0.335	0.1608	0.1608	0.1608	0.7587
407	agmatine	Amino Acid	Polyamine Metabolism	15496	LC/MS Pos Early	100000103	3057	131.129	2482-00-0	199	194	C00179	HMDB01432	2.5619	1.1211	0.8739	0.5058	2.4786	1.3274	2.8735	0.5712	1.3447	3.7487	1.0581	0.7973	0.9604	15.0946	0.7749	0.6005	1.7795	0.754	0.6985	8.0643	2.0235	0.9477	2.75	1.4268	1.5899	0.5478	0.4322	0.847	0.9529	1.2179	1.6864	0.8192	0.8138	2.0919	0.8609	0.4295
28	alanine	Amino Acid	Alanine and Aspartate Metabolism	1126	LC/MS Pos Early	811	1700	90.055	56-41-7	5950	5735	C00041	HMDB00161	0.9751	0.392	0.075	0.0546	0.3494	1.5361	0.1585	0.0145	0.4094	0.2041	1.0006	0.0238	0.1451	1.8804	1.0667	1.6091	1.2742	0.9881	0.6599	2.9211	1.1832	2.2075	1.4206	0.8162	1.4696	1.3755	2.492	0.6298	1.3959	1.684	0.2956	1.5845	0.0232	0.1065	0.8114	1.5651
843	alanyl-glutamyl-meso-diaminopimelate	Peptide	Polypeptide	53165	LC/MS Neg	100008987	635	389.168		826	803			0.1324	0.3435	0.1157	0.1157	0.1157	17.8777	0.1157	0.1157	1.2825	0.5526	0.9051	0.1157	0.1157	60.829	1	0.1157	3.0832	0.1157	2.5714	2.4107	0.6483	0.7319	0.9156	0.1157	1.506	1.5926	0.7366	0.5338	0.1157	0.1157	0.547	1.2831	0.1157	0.1157	0.1157	1.2276
482	alanylleucine	Peptide	Dipeptide	37093	LC/MS Pos Early	100001890	3055	203.139	1638-60-4	259583	227831		HMDB28691	13.1794	5.5625	2.1482	1.5387	11.1263	1.7718	15.2741	0.6713	19.422	21.6325	37.7064	0.7282	2.1104	1.2813	0.6114	0.4164	0.8167	0.4268	0.3628	0.632	0.6637	2.2971	1.0793	13.9819	0.6581	0.7651	0.9207	0.6337	0.77	4.0179	18.2834	0.2717	1.1366	4.6888	0.5772	0.241
3398	allantoin	Nucleotide	Purine Metabolism, (Hypo)Xanthine/Inosine containing	1107	LC/MS Polar	1002	1672	157.037	97-59-6	204	199	C02350	HMDB00462	1.0223	6.427	0.1719	0.5183	0.7956	0.1509	0.6078	0.1509	4.4176	3.3999	1.9825	0.1509	0.8407	0.5862	0.1509	1.5451	0.1509	1.6422	0.1509	3.4926	0.2696	0.3016	1.4474	0.1509	0.1509	1	2.364	0.1509	1.5737	0.1509	0.1509	7.9979	0.1509	0.1509	1.7514	0.1781
18	allo-threonine	Amino Acid	Glycine, Serine and Threonine Metabolism	15142	LC/MS Polar	100000272	2511.1	118.051	28954-12-3	99289	89699	C05519	HMDB04041	0.4168	0.7663	0.1105	0.1105	0.1105	0.1105	0.1105	0.1105	0.1105	0.1105	0.2596	0.1105	0.1105	1.5145	0.1105	2.7415	0.1105	0.326	0.1105	6.9357	0.1105	2.022	1	1.147	0.4916	0.8407	4.1162	0.1105	3.4885	0.1105	0.1105	0.8911	0.1105	0.1105	0.1105	0.6981
264	alpha-hydroxyisocaproate	Amino Acid	Leucine, Isoleucine and Valine Metabolism	22132	LC/MS Neg	100000706	1840	131.071	10303-64-7	83697	75520	C03264	HMDB00746	1.8611	1.0111	0.0805	0.0414	0.5014	0.9889	0.2157	0.0414	1.8468	0.4084	4.2889	0.0414	0.1082	14.7738	0.4528	2.5907	0.5659	0.6039	0.3821	15.121	0.4853	0.6673	1.364	6.7937	3.8705	1.2835	55.4506	0.1685	2.0097	11.5625	0.1293	2.7382	0.0414	0.0582	0.2227	2.4268
297	alpha-hydroxyisovalerate	Amino Acid	Leucine, Isoleucine and Valine Metabolism	46537	LC/MS Polar	100001300	1052	117.056	600-37-3	99823	90190		HMDB00407	1.1864	0.6741	0.0218	0.0187	0.2883	1.3115	0.1004	0.0308	1	0.1744	2.1744	0.0187	0.0828	17.0799	0.4314	2.8248	0.5534	0.5807	0.7543	18.855	0.4058	1.0969	1.0122	4.5581	6.1272	1.081	36.704	0.2165	2.394	9.3628	0.1783	2.7937	0.0187	0.0473	0.2186	2.6546
4502	alpha-hydroxymetoprolol	Xenobiotics	Drug - Cardiovascular	54738	LC/MS Pos Early	100006385	2900	284.186	56392-16-6	114962	102899		HMDB60994	1	1	1	1	1	1	1	1	1	1	1	1	1	1	1	1	1	1	1	1	1	1	1	1	1	1	1	1	1	1	1	1	1	1	1	1
344	alpha-ketobutyrate	Amino Acid	Methionine, Cysteine, SAM and Taurine Metabolism	4968	LC/MS Polar	796	940	101.024	600-18-0	58	2829426	C00109	HMDB00005	0.3583	0.2327	0.2327	0.2327	0.2327	0.2327	0.2327	0.2327	0.2327	0.2327	0.2327	0.2327	0.2327	3.4215	0.2327	0.8633	0.2327	1.3384	0.2327	1.3773	0.2327	0.2327	0.2327	0.2327	0.2327	0.4376	1	0.2327	0.2327	0.2327	0.2327	0.2327	0.2327	0.2327	0.2327	0.2327
43	alpha-ketoglutaramate*	Amino Acid	Glutamate Metabolism	62101	LC/MS Polar	100002397	1916	144.03	18465-19-5					0.637	0.8138	0.0446	0.0446	0.6947	6.7196	0.1491	0.0446	1.0004	0.5446	1.3741	0.0446	0.216	5.1096	0.5789	8.8961	0.621	14.4041	0.3235	4.5538	4.8324	0.8348	5.7463	0.3187	2.061	0.6652	3.1513	1.0434	15.8609	1.3086	0.4087	1.1077	0.061	0.1022	1.27	0.4554
1128	alpha-ketoglutarate	Energy	TCA Cycle	528	LC/MS Polar	93	2700	145.014	305-72-6;328-50-7;22202-68-2	51	50	C00026	HMDB00208	1.5842	0.6927	0.0717	0.0883	0.8029	2.2659	0.3887	0.0327	1.4404	0.7002	2.7065	0.0403	0.2909	4.7963	0.7585	9.8444	0.3356	7.3253	0.3161	6.3105	0.9564	1.8768	1.1707	0.4142	2.4187	1.1902	5.5764	0.4801	1.2662	0.3586	0.5818	4.7955	0.1096	0.1415	1.3161	2.424
3599	alpha-tocopherol	Cofactors and Vitamins	Tocopherol Metabolism	1561	LC/MS Pos Late	1105	2522	430.378	59-02-9;10191-41-0	14985	14265	C02477	HMDB01893	1.7469	0.8068	0.4651	1.5938	0.5196	1.7438	0.752	0.0635	1.5387	0.9692	0.7355	0.0722	0.813	1.6821	0.1305	2.6232	2.0637	0.8746	0.6541	1.0308	1.1152	2.8092	0.5759	1.2176	0.5621	1.3079	1.8407	1.9831	1.8896	0.7377	0.57	1.2211	0.4477	0.8642	1.5719	0.7374
3600	alpha-tocopherol acetate	Cofactors and Vitamins	Tocopherol Metabolism	38288	LC/MS Pos Late	100002328	2702	490.425	7695-31-2	2117	2033	C13202	HMDB34227	0.0316	0.0316	0.0316	1.4582	0.0316	0.0316	0.6599	0.0316	0.0316	0.0316	0.0316	0.0316	0.0316	0.0316	0.0316	0.0316	0.0316	0.0316	0.0316	0.0316	0.0316	1.3401	0.0316	0.0316	0.0316	0.0316	0.0792	0.0316	3.3602	0.0316	0.0316	0.1604	0.0316	0.0316	0.0316	0.0316
3605	alpha-tocotrienol	Cofactors and Vitamins	Tocopherol Metabolism	37502	LC/MS Pos Late	100001979	1986	424.334	58864-81-6	5282347	4445512	C14153	HMDB06327	0.4582	0.6992	0.1239	0.2937	1	2.0126	0.0988	0.0335	1.8993	1.1074	0.7449	0.0335	0.5779	0.4008	0.0884	1.6186	1.0734	1.4829	1.0117	1.3788	0.8513	3.0682	0.1211	0.412	1.519	2.8556	2.0813	0.6032	1.6775	1.3385	0.3707	0.9361	0.0469	0.1285	1.3008	0.3989
2732	andro steroid monosulfate C19H28O6S (1)*	Lipid	Androgenic Steroids	32827	LC/MS Neg	100002152	3871	383.153				C04555	HMDB02759	0.2558	0.2558	0.2558	0.2558	0.2558	0.2558	0.2558	0.2558	0.2558	0.2558	0.2558	0.2558	0.2558	0.2558	0.2558	0.2558	0.2558	0.2558	0.2558	0.2558	1.7431	0.2558	0.2558	0.2558	0.2558	0.2558	0.2558	0.2558	0.2558	2.2948	0.2558	0.2558	0.2558	0.2558	0.2558	0.2558
2707	androstenediol (3alpha, 17alpha) monosulfate (2)	Lipid	Androgenic Steroids	37207	LC/MS Neg	100002026	4712	369.174						0.8997	0.1084	0.1084	0.1084	0.1084	1	0.1084	0.1084	0.1084	0.1084	0.1084	0.1084	0.1084	2.2054	0.1084	0.2744	0.1084	0.1084	0.1084	0.1084	1.7047	6.2489	0.1084	2.011	0.1084	1.1075	21.1883	0.1084	2.0855	1.3102	0.7135	0.1084	0.1084	0.1084	0.1084	0.1084
2703	androstenediol (3beta,17beta) disulfate (1)	Lipid	Androgenic Steroids	37202	LC/MS Neg	100001992	3740	224.062		87120982		C04295	HMDB03818	0.1626	0.1626	0.1626	0.1626	0.1626	2.0578	0.1626	0.1626	0.1626	0.1626	0.1626	0.1626	0.1626	0.5754	1.652	0.1626	0.1626	0.1626	0.1626	0.1626	7.7416	0.1626	0.2196	1	0.1626	0.1626	0.1626	0.1626	0.1626	2.302	0.2931	0.1626	0.1626	0.1626	0.1626	0.1626
2704	androstenediol (3beta,17beta) disulfate (2)	Lipid	Androgenic Steroids	37203	LC/MS Neg	100001994	4065	224.062		87120982		C04295	HMDB03818	0.02	0.02	0.02	0.02	0.02	1.7606	0.02	0.02	0.02	0.02	0.02	0.02	0.02	1.0871	0.9129	0.02	0.02	0.02	0.02	0.02	5.2204	0.02	0.2208	0.8513	0.02	0.8745	0.02	0.02	0.02	2.7483	0.5728	0.02	0.02	0.02	0.02	0.02
2700	androstenediol (3beta,17beta) monosulfate (1)	Lipid	Androgenic Steroids	37211	LC/MS Neg	100002028	4535	369.174	521-17-5	13847309			HMDB03818	0.0933	0.0933	0.0933	0.0933	0.0933	0.8426	0.0933	0.0933	0.0933	0.0933	0.0933	0.0933	0.0933	0.0933	1.9421	0.0933	0.0933	0.0933	0.0933	0.0933	13.8542	0.0933	0.2975	2.5243	0.0933	0.0933	0.0933	0.0933	0.0933	7.3029	0.1446	0.0933	0.0933	0.0933	0.0933	0.0933
2701	androstenediol (3beta,17beta) monosulfate (2)	Lipid	Androgenic Steroids	37210	LC/MS Neg	100002029	4500	369.174						0.2469	0.2469	0.2469	0.2469	0.2469	0.3793	0.2469	0.2469	0.2469	0.2469	0.2469	0.2469	0.2469	3.1414	0.2469	0.2469	0.2469	0.2469	0.2469	0.2469	0.8566	0.9649	0.2469	0.2469	0.2469	0.2469	4.7335	47.026	1.24	0.5595	0.2469	0.2469	0.2469	0.2469	0.2469	0.2469
2694	androsterone sulfate	Lipid	Androgenic Steroids	31591	LC/MS Neg	100001073	5022	369.174	2479-86-9	159663	19988780		HMDB02759	0.3307	0.3307	0.3307	0.8486	0.3307	6.6745	0.3307	0.3307	0.3307	0.5504	0.3307	0.3307	0.3307	0.3307	0.6281	0.3307	0.3307	0.3307	0.3307	0.3307	12.0889	0.3307	0.3307	2.4661	0.3307	0.3307	0.3307	0.3307	0.3307	5.7714	0.5785	0.3307	0.3307	0.3307	0.3307	0.3307
80	anserine	Amino Acid	Histidine Metabolism	15747	LC/MS Pos Early	100000044	2924	241.13	10030-52-1	112072	100482	C01262	HMDB00194	11.9134	0.4342	0.0299	0.0299	0.142	3.0508	0.931	0.1906	1.7677	0.1678	0.4228	0.0299	0.7536	2.1584	1.1406	1.6119	2.0516	1.0852	0.3608	0.6228	1.0222	2.3655	0.7889	11.6373	1.0733	2.7736	3.7327	1.3477	3.0772	0.7538	2.6812	1.2208	0.0299	0.1235	0.3762	0.1248
3879	apigenin	Xenobiotics	Food Component/Plant	21189	LC/MS Neg	100000935	3845	269.046	520-36-5	5280443	4444100	C01477	HMDB02124	0.2567	0.2567	0.2567	0.2567	0.2567	0.7488	0.2567	0.2567	0.2567	0.2567	0.2567	0.2567	0.2567	6.9522	101.275	0.2567	0.4698	1.1093	1.3184	0.2567	0.2567	0.5705	0.2567	0.2567	0.2567	0.2567	0.5591	0.2567	0.2567	1.8094	0.2567	0.2567	0.2567	0.2567	0.2567	1
971	arabinose	Carbohydrate	Pentose Metabolism	575	LC/MS Polar	828	1804.5	195.051	28697-53-2	66308	59687	C00216	HMDB00646	0.322	0.6812	0.0623	0.1104	0.0371	9.0458	0.453	0.0371	0.8001	0.0371	0.5229	0.0371	0.0371	14.5688	2.1165	1	0.6853	2.6155	2.6612	1.4379	3.4154	2.4734	0.4967	0.5972	0.8546	2.4957	2.7986	0.1095	2.7603	1.1459	0.5556	2.5259	0.0371	0.1418	0.3975	1.088
986	arabitol/xylitol	Carbohydrate	Pentose Metabolism	48885	LC/MS Polar	100006430	1932.4	151.061		6912		C01904		0.6665	1.0566	0.2875	0.2875	0.4063	1.434	0.3165	0.2875	1.1502	0.2875	1.4138	0.2875	0.2875	1.908	0.3411	0.4103	0.9434	0.5298	0.2875	3.125	0.2875	5.9058	0.3021	0.2875	1.5566	0.2875	0.8351	0.4407	0.2875	3.204	0.9143	18.8781	0.2875	0.2875	1.4999	0.3722
988	arabonate/xylonate	Carbohydrate	Pentose Metabolism	48255	LC/MS Polar	100006115	2700	165.04						0.5307	0.5794	0.1647	0.1168	0.3994	4.5972	0.2653	0.0577	0.9223	0.2171	0.6377	0.0577	0.4449	6.873	0.859	6.1443	1.0777	51.21	0.6878	29.3345	0.7005	2.2094	1.2609	5.2164	2.4052	1.8676	4.2091	0.7953	1.1098	2.9422	0.3414	3.9461	0.0577	0.0577	0.2713	0.7007
1199	arachidate (20:0)	Lipid	Long Chain Fatty Acid	1118	LC/MS Neg	893	6240	311.296	506-30-9	10467	10035	C06425	HMDB02212	0.8122	1.948	2.4919	2.7491	0.9419	0.6799	0.6629	0.1285	1.3976	2.5276	3.8962	0.1227	2.8954	0.9206	0.3639	7.9647	0.1572	2.1021	0.3547	4.8313	0.1211	0.6343	1.2467	1.0581	0.6449	0.2944	2.4412	0.2883	0.2978	0.184	0.6083	1.6492	0.8062	1.7804	0.8988	1.4557
1232	arachidonate (20:4n6)	Lipid	Polyunsaturated Fatty Acid (n3 and n6)	1110	LC/MS Neg	229	5535	303.233	506-32-1	444899	392692	C00219	HMDB01043	0.693	0.5542	0.0077	0.4549	0.3367	10.5404	0.3086	0.4789	8.7081	0.6113	2.4113	0.1175	0.1187	5.8864	1.4935	2.4879	1.5646	0.5856	1.5422	1.4174	1.6019	1.0228	0.669	5.3594	0.3484	1.8246	0.8314	0.6676	0.7096	4.8385	1.1993	1.1604	0.2358	0.2026	0.3859	1.727
1692	arachidoyl ethanolamide (20:0)*	Lipid	Endocannabinoid	57532	LC/MS Pos Late	100015853	1941	356.352		3787294	3015157			1.2699	0.712	0.6826	0.7635	0.4924	7.4395	0.3215	0.3215	3.588	0.6632	0.8471	0.3215	0.3691	1.0879	0.4552	0.6552	0.9624	2.5082	0.9561	1	1.1332	2.5934	2.612	2.1042	0.8593	1.2653	1.7435	1.4068	3.2544	1.7293	0.6177	0.9901	0.5518	0.9751	0.5225	0.8677
[truncated: 561 more rows]
[truncated: 6 more columns]
